# Supplementary material for: Development of a four-gene prognostic model for pancreatic cancer based on transcriptome dysregulation
Source: Aging (Albany NY). 2020 Feb 20;12(4):3747–70. doi: 10.18632/aging.102844 (PMC7066910; doi:10.18632/aging.102844)
Supplement: Supplementary Table 2 [file aging-12-102844-s003..xlsx]

## Sheet: GS_MM
Supplementary Table 2. The correlation of a gene with its Gene Significance (GS) for a specific clinical trait or Module Membership (MM) in a specific module.
Gene	Module	GS for overall survival time		GS for overall survival status		GS for age		GS for gender		GS for grade		GS for stage		GS for T		GS for N		MM in black module		MM in turquoise module		MM in salmon module		MM in brown module		MM in greenyellow module		MM in blue module		MM in grey60 module		MM in lightcyan module		MM in pink module		MM in tan module		MM in midnightblue module		MM in purple module		MM in red module		MM in grey module
		r	p	r	p	r	p	r	p	r	p	r	p	r	p	r	p	r	p	r	p	r	p	r	p	r	p	r	p	r	p	r	p	r	p	r	p	r	p	r	p	r	p	r	p
NCAPG	black	-0.0869664	0.312253	0.267626	0.00156872	0.139189	0.104773	-0.0227468	0.791904	0.08158	0.343282	-0.0910298	0.290096	0.00937267	0.913439	-0.0752344	0.382245	0.863657	5.44376e-42	0.290978	0.000561516	-0.0278941	0.746268	0.0205361	0.811733	-0.138868	0.105585	-0.280884	0.00088504	-0.384657	3.46933e-06	0.248012	0.00347674	-0.308207	0.000248283	-0.168544	0.0489777	-0.181088	0.0342004	-0.344373	3.77869e-05	0.0176902	0.837433	0.0869115	0.31256
MELTF	black	-0.0831733	0.333907	0.109798	0.201517	-0.0257068	0.765563	0.135929	0.113242	0.132105	0.123844	-0.106253	0.216546	0.00403132	0.96271	-0.0482038	0.575911	0.580626	1.02947e-13	0.373137	7.09843e-06	-0.152665	0.0749163	0.315407	0.000173891	0.0215345	0.802762	-0.188924	0.027037	-0.362611	1.33365e-05	0.0710685	0.409225	-0.349363	2.85974e-05	-0.341943	4.32048e-05	-0.154918	0.0706722	-0.32637	9.93421e-05	0.114539	0.182612	-0.151187	0.0778108
SLC2A1	black	0.0225469	0.793691	0.092145	0.284202	-0.135779	0.113645	0.0861032	0.317099	0.0938189	0.275507	-0.0480687	0.576983	0.0147181	0.864458	-0.035247	0.682612	0.686286	2.13725e-20	0.524762	4.63115e-11	-0.220443	0.0096395	0.104772	0.223057	0.0605673	0.482011	-0.389857	2.48884e-06	-0.40704	7.97078e-07	0.108003	0.209031	-0.527452	3.53864e-11	-0.330442	8.02484e-05	-0.322439	0.00012173	-0.368626	9.32612e-06	0.085571	0.320111	0.215138	0.01158
NME1-NME2	black	-0.0957571	0.265666	0.19455	0.0227206	0.178341	0.0370655	-0.122002	0.155543	0.141736	0.0985095	-0.094513	0.271955	-0.050338	0.55911	-0.0289898	0.736661	0.531436	2.36517e-11	0.245161	0.00388382	0.136906	0.110649	0.26972	0.00143583	-0.29496	0.000467066	-0.11054	0.198468	-0.223404	0.00868597	0.113344	0.18725	-0.233022	0.0061384	-0.253463	0.00280369	-0.0956531	0.266188	-0.291346	0.000552094	0.0630102	0.464483	-0.214675	0.0117647
NCEH1	black	-0.0331902	0.700217	0.20366	0.016986	-0.181473	0.0338148	-0.109561	0.202497	0.146059	0.0885582	-0.0267512	0.756332	0.0204525	0.812485	0.137992	0.107822	0.304533	0.000296737	0.00228342	0.978873	-0.414177	4.87382e-07	-0.390261	2.42478e-06	-0.173302	0.0428459	-0.109614	0.202277	-0.153499	0.0733205	0.293621	0.000497056	-0.195184	0.022274	0.0289845	0.736707	0.20247	0.0176553	0.113685	0.185919	0.187918	0.0278783	0.31052	0.000221654
RMI2	black	-0.080317	0.35083	0.12368	0.149892	0.206377	0.0155398	0.00632525	0.941522	0.15464	0.0711841	-0.0793317	0.35679	0.0569884	0.508318	-0.0268917	0.755092	0.709641	2.82515e-22	0.34137	4.45826e-05	0.165645	0.0530587	0.282743	0.000814922	-0.121958	0.155691	-0.225019	0.00820197	-0.468455	7.79323e-09	0.281919	0.000845359	-0.232488	0.00626015	-0.159999	0.0618142	-0.146602	0.0873663	-0.517768	9.21995e-11	-0.111674	0.193874	-0.0170461	0.843275
HMGB2	black	-0.114335	0.183398	0.151578	0.0770353	0.143418	0.0945367	-0.0408076	0.635884	-0.0138768	0.872138	0.0146379	0.86519	0.10698	0.213401	0.0123404	0.886194	0.410738	6.18596e-07	-0.123649	0.149996	0.156943	0.0670249	0.00504405	0.953352	0.138233	0.107202	-0.297005	0.000424488	-0.2991	0.000384603	0.229735	0.0069222	0.215612	0.0113935	0.114608	0.182347	0.0901994	0.294536	-0.109253	0.203775	-0.0529124	0.539163	-0.0587035	0.495619
MZT1	black	-0.0760093	0.377349	0.13089	0.127371	0.143258	0.0949079	0.0648116	0.451785	0.0220967	0.797721	-0.145105	0.0906818	-0.000290644	0.997311	-0.0662397	0.441859	0.604248	5.38605e-15	0.238042	0.00509344	0.0347324	0.687001	-0.127643	0.137169	-0.0723656	0.400707	-0.228082	0.00734894	-0.161207	0.0598474	0.139416	0.104201	-0.346692	3.32172e-05	-0.223346	0.00870382	-0.19509	0.0223396	-0.187956	0.0278455	6.45436e-06	0.99994	0.116664	0.174576
ITGB3BP	black	-0.197641	0.020612	0.114312	0.183486	0.160454	0.0610674	0.0912269	0.289048	-0.0816009	0.343158	-0.157631	0.0658215	0.0481943	0.575987	-0.134114	0.118182	0.463524	1.16987e-08	0.217319	0.0107441	0.21843	0.0103392	0.181775	0.033514	0.00981904	0.909334	-0.186052	0.0294974	-0.24657	0.00367764	0.091061	0.289929	-0.176836	0.0387187	-0.204751	0.0163917	-0.17739	0.0381032	-0.288944	0.000616257	-0.0964343	0.262285	-0.13448	0.117172
CMSS1	black	-0.119011	0.166007	0.201264	0.018357	0.209003	0.0142448	0.101062	0.239966	0.136886	0.110702	-0.0958135	0.265384	-0.0418554	0.62723	-0.10557	0.219528	0.481275	2.62891e-09	0.00316985	0.970675	0.452513	2.83211e-08	0.0234745	0.785406	-0.414894	4.63568e-07	-0.0141366	0.869766	0.0594535	0.490119	-0.0399862	0.642703	-0.0598018	0.487576	-0.0524137	0.542999	-0.0722242	0.40163	-0.104986	0.222105	0.0133699	0.876771	-0.388105	2.78524e-06
KRT6A	black	-0.15182	0.0765591	0.0236333	0.783989	0.121892	0.155919	0.195861	0.0218045	0.11551	0.178908	-0.119241	0.165183	-0.0233027	0.786938	-0.0345504	0.688556	0.555731	1.80291e-12	0.112374	0.191077	0.0373178	0.665057	0.0794037	0.356352	-0.114282	0.183604	-0.137667	0.108662	-0.166754	0.0514647	0.112111	0.192124	-0.184105	0.031272	-0.154495	0.0714524	-0.0020433	0.981094	-0.123496	0.150506	0.186205	0.0293618	-0.19865	0.0199615
INTS4	black	-0.128735	0.13381	0.180955	0.0343342	0.125447	0.144113	0.267162	0.00159966	0.0329895	0.701943	-0.0453254	0.598937	0.0424843	0.62206	-0.0647513	0.452207	0.547235	4.54069e-12	0.383176	3.80947e-06	0.247197	0.00358896	0.167914	0.049841	0.079719	0.35444	-0.195165	0.0222872	-0.484885	1.9203e-09	0.0295964	0.731359	-0.322078	0.000124005	-0.240487	0.00464456	-0.361387	1.43308e-05	-0.404644	9.3782e-07	-0.076292	0.375571	0.0629322	0.465037
ABCC1	black	-0.00727418	0.932768	0.117471	0.171593	0.0596831	0.488441	0.0857651	0.31901	0.0580363	0.500539	0.0549252	0.523816	0.104336	0.224999	-0.0123801	0.885829	0.352564	2.38582e-05	0.149214	0.0818141	-0.127135	0.138752	-0.251492	0.00303204	-0.0455131	0.597423	-0.336317	5.86662e-05	-0.279518	0.000940033	0.00480052	0.955601	-0.219118	0.010095	-0.1123	0.191372	-0.0670303	0.436418	-0.0470093	0.585417	0.103261	0.22984	0.430746	1.48743e-07
NEK2	black	-0.0498257	0.563122	0.317437	0.000157017	0.096233	0.263287	0.0751421	0.382831	0.147717	0.0849594	-0.0621109	0.470894	0.00320208	0.970377	-0.03798	0.659481	0.867734	8.09337e-43	0.516024	1.09203e-10	-0.00653011	0.939631	0.0679376	0.43022	-0.0807777	0.348065	-0.290226	0.000581217	-0.458022	1.8268e-08	0.189502	0.0265632	-0.561034	9.9942e-13	-0.380361	4.54529e-06	-0.3317	7.50819e-05	-0.467988	8.10103e-09	-0.0455599	0.597046	0.224792	0.00826844
PBK	black	-0.0852573	0.321894	0.225066	0.00818839	0.112084	0.192235	0.00626732	0.942056	0.115044	0.180681	-0.0574201	0.505106	0.0529456	0.538908	-0.0820362	0.340581	0.826041	1.99328e-35	0.391624	2.22025e-06	0.0292318	0.734544	0.0720813	0.402565	-0.178556	0.0368333	-0.263831	0.00183845	-0.408385	7.2714e-07	0.165413	0.0533971	-0.418955	3.48367e-07	-0.26048	0.00211098	-0.260776	0.00208553	-0.410932	6.10408e-07	-0.0355085	0.680385	0.125728	0.14321
SLBP	black	-0.0778664	0.365769	0.125839	0.142854	0.0870583	0.31174	-0.0417402	0.62818	-0.0330239	0.701647	-0.0391869	0.649366	-0.100012	0.244909	-0.0105074	0.903008	0.444309	5.36453e-08	0.0891053	0.300456	-0.0998335	0.245757	-0.12273	0.153072	-0.216223	0.0111573	-0.224797	0.00826697	-0.15969	0.0623241	0.212882	0.0125043	-0.129044	0.132873	0.0091222	0.915744	-0.0896038	0.297749	-0.133654	0.11946	0.0334653	0.697852	0.122874	0.152589
ENO1	black	0.0421387	0.624899	0.136793	0.110945	-0.0166638	0.846746	0.0139006	0.87192	0.13694	0.110559	0.0620852	0.471078	0.0140787	0.870294	0.0421008	0.625211	0.547273	4.52258e-12	0.147011	0.0864762	-0.326004	0.00010125	-0.0589277	0.493971	-0.176461	0.0391393	-0.276803	0.00105876	-0.192072	0.0245426	0.191538	0.0249514	-0.306804	0.000265839	-0.199614	0.0193559	0.0168755	0.844824	-0.0470402	0.58517	0.281029	0.000879367	0.00212236	0.980363
CCDC51	black	0.0218523	0.799912	0.212062	0.0128558	0.24842	0.00342176	0.0752249	0.382305	0.116788	0.174114	-0.044127	0.608644	0.0339581	0.693624	-0.0477944	0.579161	0.480782	2.74359e-09	0.425154	2.23597e-07	0.217148	0.0108076	0.253737	0.00277309	-0.181783	0.0335062	-0.113666	0.185993	-0.266874	0.00161912	0.0877673	0.307801	-0.34816	3.05979e-05	-0.194561	0.0227129	-0.274773	0.00115629	-0.445686	4.82496e-08	-0.155069	0.0703941	0.0134475	0.876061
S100A3	black	-0.00637821	0.941033	0.189407	0.0266405	-0.0591384	0.492425	-0.111089	0.196234	0.0820911	0.340257	0.0473466	0.582725	0.0738618	0.391013	-0.0926317	0.281655	0.450499	3.3181e-08	0.180977	0.0343123	0.0845046	0.3262	0.32176	0.000126041	-0.106918	0.213668	-0.1163	0.175933	-0.202944	0.0173859	0.131507	0.125571	-0.161665	0.0591144	-0.20854	0.0144659	0.0325362	0.705849	-0.24639	0.00370333	0.106141	0.217033	-0.317096	0.000159745
DLGAP5	black	-0.121379	0.157679	0.238062	0.00508973	0.121431	0.1575	0.0452197	0.59979	0.159704	0.0623014	-0.00902776	0.916613	0.0909807	0.290357	-0.011258	0.896117	0.908835	4.14039e-53	0.365794	1.10464e-05	0.00276138	0.974452	0.0323798	0.707198	-0.131325	0.126098	-0.314861	0.000178704	-0.410634	6.23079e-07	0.283336	0.00079366	-0.401997	1.12078e-06	-0.271103	0.00135375	-0.210265	0.0136567	-0.397988	1.46373e-06	0.000903091	0.991643	0.13663	0.111377
HRASLS2	black	-0.114217	0.183855	0.210502	0.0135483	0.0115979	0.892999	0.125231	0.14481	0.148439	0.0834314	0.0153559	0.858644	0.058557	0.496697	-0.0203396	0.813501	0.4761	4.09872e-09	0.276013	0.00109578	0.0355298	0.680203	0.153963	0.0724453	-0.00180799	0.983271	-0.216925	0.010891	-0.313875	0.000187719	0.319705	0.000139981	-0.210575	0.0135152	-0.180396	0.0349035	-0.175576	0.0401496	-0.309126	0.000237361	0.0140082	0.870938	0.0482695	0.57539
RACGAP1	black	-0.0612369	0.477171	0.291346	0.000552094	0.0816389	0.342932	0.164291	0.0550583	0.118554	0.167648	-0.0603421	0.483644	0.0706402	0.412061	-0.0279581	0.745706	0.825327	2.56251e-35	0.278556	0.000980603	0.026819	0.755734	-0.0572839	0.506119	-0.192142	0.0244896	-0.326455	9.89068e-05	-0.394596	1.82969e-06	0.285781	0.000711211	-0.35302	2.3246e-05	-0.229763	0.00691513	-0.0901347	0.294884	-0.291348	0.000552045	0.0598808	0.486999	0.154401	0.0716278
PLIN4	black	0.058934	0.493925	-0.206471	0.0154913	0.0340642	0.692716	-0.00959365	0.911407	-0.0766593	0.373271	0.089853	0.296402	0.0914503	0.287864	0.0896989	0.297234	-0.344132	3.82936e-05	-0.47848	3.34456e-09	0.167571	0.0503167	-0.0832839	0.333262	0.11041	0.199002	0.0223359	0.79558	0.272828	0.00125738	-0.129219	0.132343	0.522893	5.57498e-11	0.269891	0.00142546	0.170993	0.0457354	0.368599	9.34157e-06	0.00222608	0.979403	-0.319464	0.0001417
CIRBP	black	0.00638029	0.941014	-0.222912	0.00883856	0.0762259	0.375987	-0.0677345	0.431603	-0.0813762	0.344493	-0.116302	0.175927	-0.128	0.136064	-0.0559902	0.515787	-0.618212	8.37084e-16	-0.283016	0.000805065	0.390938	2.32118e-06	0.349584	2.82439e-05	0.447484	4.19799e-08	0.357035	1.8462e-05	0.396959	1.56666e-06	-0.292958	0.000512551	0.484747	1.94366e-09	0.164489	0.0547616	-0.0157868	0.854721	0.090536	0.292731	-0.274829	0.00115351	-0.437073	9.29447e-08
FAM83D	black	-0.0219698	0.798858	0.114983	0.180912	0.0679825	0.429915	0.034411	0.689747	0.124628	0.146772	0.0182992	0.831918	0.0833085	0.333119	0.0500545	0.561329	0.478442	3.35554e-09	0.196158	0.0216014	-0.048888	0.5705	-0.0208543	0.808871	-0.127094	0.13888	-0.31195	0.000206553	-0.403445	1.01686e-06	0.079773	0.354112	-0.301271	0.000346943	-0.290806	0.000565957	-0.0549204	0.523852	-0.0735743	0.392865	0.233043	0.00613381	0.102729	0.23226
RHOU	black	0.0765325	0.374064	-0.106075	0.217321	-0.108746	0.205894	-0.0798373	0.353723	-0.208943	0.014273	0.0610046	0.478847	-0.035421	0.681129	0.0793134	0.356901	-0.546172	5.08796e-12	-0.313901	0.000187482	-0.155777	0.0691052	-0.426139	2.0822e-07	-0.164078	0.055379	0.218311	0.0103819	0.231085	0.00659015	-0.0338497	0.694554	0.273323	0.00123091	0.278912	0.00096543	0.181855	0.0334351	0.363475	1.26745e-05	-0.0710263	0.409504	0.305825	0.00027878
TOP2A	black	-0.0873073	0.310353	0.300444	0.000360866	0.0208614	0.808807	0.010196	0.905869	0.101491	0.237966	-0.0508659	0.554991	0.0601618	0.484954	0.0128708	0.881337	0.816884	4.5804e-34	0.26772	0.00156255	-0.0849193	0.323823	-0.211847	0.0129494	-0.143074	0.0953391	-0.32358	0.000114786	-0.399832	1.29515e-06	0.240271	0.00468272	-0.372316	7.46216e-06	-0.148012	0.0843321	-0.137642	0.108727	-0.209958	0.0137978	0.118441	0.168058	0.282128	0.000837544
SLC25A27	black	0.0253909	0.768363	-0.172414	0.0439384	-0.138604	0.106256	0.022227	0.796555	0.0289516	0.736995	-0.0730033	0.396558	-0.12792	0.136309	0.00809601	0.925193	-0.528304	3.24802e-11	-0.199811	0.0192341	0.0651666	0.449306	0.134237	0.117843	0.440216	7.33196e-08	0.374136	6.67825e-06	0.426053	2.09525e-07	-0.202238	0.0177886	0.184567	0.0308432	0.0202654	0.814169	0.00391435	0.963791	0.201945	0.017958	-0.161882	0.0587713	-0.262687	0.00192769
NCAPH	black	-0.0682076	0.428385	0.241635	0.00444625	0.196675	0.021252	0.0129474	0.880636	0.131364	0.125986	-0.092926	0.280123	0.0424942	0.621979	-0.0181594	0.833184	0.873204	5.66254e-44	0.262208	0.00196623	0.0219165	0.799336	0.0198667	0.817761	-0.130397	0.128821	-0.35101	2.60581e-05	-0.356655	1.88712e-05	0.268817	0.00149183	-0.271734	0.00131778	-0.132105	0.123844	-0.135372	0.11474	-0.32896	8.67613e-05	0.019146	0.824263	0.0864195	0.315318
PPIA	black	0.0804531	0.350012	0.18003	0.0352812	0.0805436	0.349468	0.0595519	0.4894	0.0874517	0.30955	-0.107608	0.210708	-0.0460789	0.592869	-0.00612544	0.943366	0.582809	7.91578e-14	0.387919	2.81873e-06	0.35143	2.54454e-05	0.357323	1.81577e-05	-0.00512032	0.952647	-0.213736	0.0121468	-0.340457	4.68663e-05	0.0578984	0.501559	-0.236566	0.00538279	-0.329756	8.32066e-05	-0.279777	0.000929375	-0.540216	9.55352e-12	-0.257689	0.00236541	-0.0970123	0.259422
POLI	black	-0.0829605	0.33515	-0.0039268	0.963676	-0.0587795	0.49506	-0.189363	0.026676	0.00279158	0.974173	0.0384773	0.655306	-0.0191384	0.824331	0.112438	0.190822	-0.406033	8.53603e-07	-0.323419	0.000115746	-0.116236	0.176173	-0.247397	0.00356113	0.172051	0.0443916	0.327798	9.22104e-05	0.348697	2.96902e-05	-0.0581503	0.499697	0.161097	0.0600235	0.0850902	0.322847	0.13373	0.119248	0.377601	5.39588e-06	0.098195	0.253631	-0.0720236	0.402943
ALYREF	black	0.040545	0.63806	-0.0604877	0.482588	0.095165	0.268647	-0.011584	0.893127	0.0586433	0.496062	-0.18004	0.03527	0.0342224	0.691361	-0.0459347	0.594029	0.387626	2.872e-06	0.000229473	0.997877	0.266503	0.00164453	0.314463	0.000182297	-0.0728579	0.397502	-0.169761	0.0473433	-0.084671	0.325245	0.0250504	0.771383	0.129579	0.13126	-0.00848203	0.921637	-0.0251789	0.770243	-0.198744	0.0199015	-0.0659579	0.443808	-0.41799	3.72959e-07
DSG3	black	-0.091911	0.285432	0.114966	0.180977	0.0898407	0.296469	0.137118	0.110093	0.115242	0.179924	-0.0262208	0.761016	0.0828607	0.335733	0.0640831	0.456897	0.489959	1.22718e-09	0.131766	0.12482	-0.083185	0.333839	-0.00638841	0.940939	-0.11464	0.182224	-0.242103	0.00436767	-0.199878	0.0191934	0.220095	0.00975717	-0.207651	0.0148993	-0.0604102	0.48315	-0.0648071	0.451818	-0.0899297	0.295988	0.182505	0.0327971	-0.0236845	0.783533
FAM83A	black	-0.107068	0.213021	0.151944	0.0763161	-0.0453704	0.598574	0.120205	0.161768	0.157593	0.0658881	-0.0849671	0.32355	-0.0835239	0.331866	-0.0555977	0.518738	0.59355	2.11128e-14	0.350629	2.66269e-05	-0.0334338	0.698123	0.130812	0.127599	-0.104006	0.226475	-0.191927	0.0246533	-0.299295	0.000381072	-0.0721537	0.402091	-0.353656	2.2418e-05	-0.22933	0.00702478	-0.228447	0.00725282	-0.253759	0.00277073	0.165592	0.0531357	-0.0555411	0.519165
HRH1	black	-0.0890451	0.300784	0.203324	0.0171728	-0.181743	0.0335452	0.0104061	0.903939	0.127426	0.137843	-0.0415384	0.629843	0.0112614	0.896085	0.020455	0.812463	0.599104	1.04538e-14	0.339603	4.9101e-05	-0.171437	0.0451673	-0.0935176	0.277059	-0.123603	0.150149	-0.380835	4.41269e-06	-0.43044	1.52119e-07	0.128457	0.13466	-0.458443	1.76603e-08	-0.315859	0.000169997	-0.145163	0.0905513	-0.117623	0.171034	0.333945	6.66291e-05	0.150851	0.07848
CENPA	black	-0.111477	0.194666	0.26332	0.00187787	0.107076	0.212988	0.0565152	0.511851	0.174901	0.040935	-0.0695361	0.419424	0.0142178	0.869023	0.0262888	0.760415	0.891785	2.44478e-48	0.396899	1.57282e-06	0.0877834	0.307712	0.173479	0.04263	-0.137691	0.108599	-0.257175	0.00241515	-0.418179	3.68017e-07	0.192812	0.0239859	-0.383536	3.72403e-06	-0.283075	0.000802951	-0.282068	0.00083976	-0.457585	1.89195e-08	-0.0257097	0.765538	-0.0129011	0.88106
CENPF	black	-0.0818714	0.341555	0.325887	0.000101869	0.141417	0.0992758	0.0883195	0.304756	0.124924	0.145807	-0.0807455	0.348257	-0.0498316	0.563076	-0.0558588	0.516774	0.830708	3.75751e-36	0.44911	3.69882e-08	-0.0657144	0.445496	-0.0404053	0.63922	-0.0518441	0.547398	-0.32392	0.000112791	-0.421717	2.86236e-07	0.143953	0.0932997	-0.528201	3.28165e-11	-0.317509	0.000156451	-0.311436	0.000211868	-0.33762	5.46831e-05	0.0595254	0.489593	0.268663	0.0015016
DNAJB11	black	-0.104653	0.223584	0.209236	0.0141344	-0.0546318	0.52604	0.0295799	0.731503	0.0994716	0.247482	-0.108985	0.204896	-0.0642463	0.455749	-0.0193277	0.822623	0.542625	7.41563e-12	0.292496	0.000523604	0.0845093	0.326174	0.108941	0.20508	-0.18784	0.0279439	-0.0734532	0.393646	-0.317628	0.00015551	-0.0276346	0.74855	-0.330335	8.07055e-05	-0.226017	0.00791487	-0.240307	0.00467639	-0.277276	0.00103712	0.0576551	0.503362	-0.0755635	0.380161
TPX2	black	-0.103567	0.228451	0.284878	0.000740703	0.135062	0.115582	0.0959749	0.264575	0.193863	0.0232142	-0.106495	0.215496	0.0295223	0.732006	-0.0325745	0.705519	0.936404	2.93499e-63	0.414129	4.8901e-07	0.0635501	0.460657	0.105441	0.220099	-0.102606	0.23282	-0.34901	2.91717e-05	-0.428725	1.72501e-07	0.276978	0.00105069	-0.411194	5.99469e-07	-0.264307	0.00180247	-0.246545	0.0036811	-0.447302	4.25771e-08	-0.0134217	0.876297	0.0998227	0.245808
LAMC2	black	-0.0193869	0.822089	0.268374	0.00152001	-0.0565936	0.511266	0.0820754	0.340349	0.207078	0.0151844	0.00175112	0.983797	0.0504651	0.558117	0.0624142	0.468727	0.616224	1.09717e-15	0.345742	3.50231e-05	-0.262694	0.00192718	-0.128374	0.134913	-0.115045	0.180675	-0.260479	0.00211112	-0.265274	0.00173134	0.0554467	0.519877	-0.469081	7.3982e-09	-0.225358	0.00810335	-0.133408	0.120149	-0.14997	0.0802605	0.178308	0.0371007	0.19339	0.0235587
CSTF2	black	-0.0558416	0.516903	0.169494	0.0476973	0.112226	0.191666	0.126786	0.139847	0.108629	0.206388	-0.0346892	0.687369	0.0352961	0.682193	-0.00664667	0.938556	0.649257	9.39714e-18	0.209986	0.0137847	-0.0276889	0.748073	-0.152749	0.0747537	-0.326431	9.90281e-05	-0.225766	0.00798618	-0.31198	0.000206248	0.351874	2.48127e-05	-0.265222	0.00173509	-0.120216	0.161729	-0.0645898	0.453339	-0.240509	0.00464068	0.00672959	0.937791	0.196862	0.0211272
UNG	black	-0.0512551	0.551964	0.121429	0.157509	0.236515	0.00539307	0.0850129	0.323289	0.212769	0.012552	-0.106229	0.216648	-0.0212168	0.805614	0.0601377	0.48513	0.471425	6.08269e-09	0.173276	0.0428767	0.210425	0.0135834	0.0326599	0.704782	-0.123595	0.150176	0.0361336	0.675074	-0.113631	0.18613	0.150217	0.0797589	-0.1897	0.0264025	-0.0888552	0.30182	-0.174134	0.0418423	-0.272337	0.0012842	-0.181654	0.0336341	-0.0261405	0.761726
BTNL9	black	0.0500665	0.561235	-0.151348	0.0774908	0.144145	0.0928598	-0.0485809	0.572925	-0.0794769	0.355908	0.106592	0.215074	0.0116805	0.892241	0.117994	0.169679	-0.481484	2.58187e-09	-0.127433	0.137822	0.168922	0.0484655	0.0670835	0.436053	0.365503	1.12396e-05	0.0254532	0.767811	0.156155	0.0684261	-0.119028	0.165944	0.326781	9.72372e-05	0.189877	0.02626	-0.120571	0.160485	0.0392525	0.648818	-0.321199	0.000129709	0.104026	0.226385
NOP10	black	-0.0496142	0.564782	0.069421	0.420197	-0.0070456	0.934876	0.0111531	0.89708	-0.0298052	0.729537	-0.0247693	0.773879	0.0207087	0.81018	-0.0498987	0.56255	0.402194	1.10609e-06	0.333711	6.74639e-05	0.124068	0.148608	0.306384	0.000271327	-0.130446	0.128677	-0.190186	0.0260121	-0.227407	0.00752981	0.218425	0.0103411	-0.222505	0.00896635	-0.299712	0.000373618	-0.088692	0.302713	-0.421903	2.82444e-07	-0.100492	0.242642	-0.04224	0.624067
ABCA10	black	0.0576141	0.503666	-0.128502	0.134523	-0.167661	0.0501922	-0.12312	0.15176	-0.112303	0.191361	0.167664	0.050188	0.0803402	0.35069	0.0298544	0.729108	-0.58058	1.03517e-13	-0.43096	1.46413e-07	-0.133055	0.121141	-0.323313	0.000116377	0.0283967	0.741857	0.199175	0.0196295	0.395135	1.76625e-06	-0.0635826	0.460427	0.355054	2.06933e-05	0.318527	0.000148603	0.212324	0.0127425	0.51103	1.76388e-10	0.0883936	0.304349	0.00172814	0.98401
IARS2	black	-0.0040845	0.962218	0.19385	0.0232233	0.0511606	0.552698	-0.0684921	0.426457	0.0560725	0.515169	0.0265993	0.757673	-0.0276823	0.74813	0.00744279	0.931213	0.151091	0.078002	0.189661	0.0264344	-0.223406	0.00868539	-0.50928	2.0826e-10	-0.137298	0.109622	-0.0480277	0.577308	-0.0528166	0.539899	0.00035343	0.99673	-0.381172	4.32076e-06	-0.0748617	0.384614	-0.17014	0.0468439	0.0136647	0.874076	-0.0669348	0.437073	0.636515	6.31074e-17
NDC80	black	-0.125785	0.143026	0.239126	0.00488994	0.0476573	0.580252	0.0363984	0.672829	0.133838	0.118948	-0.0280568	0.74484	0.0758973	0.378054	-0.0267423	0.75641	0.735039	1.53156e-24	0.179325	0.0360167	-0.0549852	0.523362	0.0210348	0.807249	-0.141575	0.098895	-0.329343	8.50352e-05	-0.331733	7.49518e-05	0.330732	7.90296e-05	-0.228416	0.00726092	-0.134855	0.116146	-0.0619293	0.472195	-0.209411	0.0140521	0.186847	0.0287978	-0.00638951	0.940929
FEN1	black	-0.0927435	0.281072	0.200045	0.0190906	0.277966	0.00100629	-0.05822	0.499182	0.130053	0.129841	-0.14612	0.0884225	-0.0416982	0.628525	-0.083081	0.334446	0.7106	2.34418e-22	0.16484	0.0542395	0.196412	0.0214296	0.22635	0.00782112	-0.278779	0.00097105	-0.104987	0.222103	-0.203063	0.0173189	0.151886	0.0764303	-0.105605	0.219377	-0.0365141	0.671849	-0.109345	0.203392	-0.337146	5.61013e-05	-0.0574881	0.504601	-0.242329	0.00433011
ARNTL2	black	-0.11311	0.18817	0.343147	4.04347e-05	-0.0593766	0.490681	0.0207498	0.80981	0.234452	0.00582286	-0.0253207	0.768985	0.055536	0.519203	0.0823209	0.338902	0.719494	3.99673e-23	0.315674	0.000171574	-0.106151	0.21699	-0.0875186	0.309179	-0.129347	0.131957	-0.246282	0.00371896	-0.381235	4.30364e-06	0.218353	0.0103668	-0.44934	3.63299e-08	-0.281344	0.000867184	-0.136873	0.110737	-0.197978	0.0203925	0.197428	0.0207515	0.108183	0.208266
RAD51AP1	black	-0.114034	0.184564	0.263738	0.00184557	0.146135	0.0883896	0.00727714	0.932741	0.144412	0.0922505	-0.0790607	0.35844	0.00983138	0.909221	0.0832684	0.333353	0.772323	2.19665e-28	0.288083	0.000640869	0.00515422	0.952334	-0.151933	0.076339	-0.115742	0.178032	-0.247122	0.00359948	-0.340573	4.65708e-05	0.3317	7.50821e-05	-0.374239	6.63631e-06	-0.223561	0.00863778	-0.164695	0.0544546	-0.281253	0.000870672	-0.016379	0.849335	0.257502	0.00238344
AP1S3	black	-0.0541918	0.529382	0.252492	0.00291411	-0.0761016	0.376768	0.079416	0.356278	0.115542	0.178788	-0.0451502	0.600352	-0.0262111	0.761102	0.0220001	0.798587	0.63982	3.88368e-17	0.510398	1.87302e-10	-0.268267	0.0015269	-0.137447	0.109234	-0.0953775	0.267574	-0.283294	0.000795149	-0.38214	4.06624e-06	0.0694839	0.419775	-0.629447	1.74757e-16	-0.344805	3.6893e-05	-0.296337	0.000437987	-0.289111	0.000611595	0.0562767	0.513638	0.442907	5.97315e-08
TES	black	-0.0127529	0.882416	0.178528	0.0368641	-0.196329	0.0214858	0.0103199	0.90473	-0.0336519	0.69625	0.00779406	0.927975	-0.00229739	0.978744	0.0443687	0.60668	0.368709	9.28008e-06	0.197234	0.0208794	-0.325164	0.000105766	-0.304011	0.000304286	-0.0864017	0.315418	-0.30988	0.000228749	-0.316687	0.000163065	-0.0430116	0.61774	-0.301315	0.000346222	-0.128605	0.134208	-0.167167	0.0508814	0.0485044	0.573531	0.206255	0.0156024	0.325773	0.000102475
SPC24	black	-0.143624	0.0940596	0.175039	0.0407735	0.189844	0.0262867	0.0511194	0.553019	0.121296	0.157966	-0.159721	0.0622738	-0.0597491	0.48796	-0.167409	0.0505427	0.812726	1.79517e-33	0.503451	3.59832e-10	0.191579	0.0249199	0.516015	1.09296e-10	0.0336827	0.695986	-0.284852	0.000741558	-0.42936	1.64665e-07	0.161892	0.0587556	-0.344097	3.8369e-05	-0.385631	3.26143e-06	-0.314895	0.000178403	-0.612437	1.82794e-15	-0.113791	0.185506	-0.170452	0.0464358
PLK1	black	-0.0594239	0.490335	0.214188	0.0119617	0.172167	0.0442467	0.118463	0.167977	0.181551	0.033736	-0.0956355	0.266277	0.0323141	0.707765	-0.0158225	0.854396	0.858414	5.7821e-41	0.592123	2.52362e-14	0.0557421	0.517652	0.375719	6.06024e-06	0.0791134	0.358119	-0.301901	0.000336671	-0.512122	1.5893e-10	0.192764	0.0240217	-0.467289	8.58369e-09	-0.37345	6.964e-06	-0.366968	1.02998e-05	-0.655722	3.45286e-18	-0.182723	0.0325862	0.141664	0.0986802
IL20RB	black	-0.158666	0.0640444	0.17563	0.0400872	-0.042757	0.619825	0.195036	0.0223777	0.26133	0.00203863	-0.0783999	0.362484	-0.0157534	0.855025	0.0840394	0.32888	0.493659	8.81244e-10	0.125492	0.143968	-0.023204	0.787819	0.0593961	0.490538	-0.129115	0.132656	-0.213526	0.0122341	-0.225663	0.00801562	0.253029	0.00285259	-0.160822	0.0604683	-0.185771	0.029748	-0.0319954	0.710518	-0.134495	0.117131	0.165534	0.0532198	-0.116296	0.17595
MRPS10	black	-0.134714	0.116531	0.15528	0.0700078	0.117958	0.16981	0.00215757	0.980037	0.155439	0.0697189	-0.0947086	0.27096	-0.109061	0.204576	-0.0475467	0.581132	0.422484	2.70942e-07	0.0496853	0.564224	0.046654	0.588258	-0.197501	0.0207039	-0.222247	0.00904816	-0.0180131	0.834509	-0.0378926	0.660215	0.0529613	0.538787	-0.211897	0.0129273	-0.0172522	0.841406	-0.0366013	0.671111	-0.0300065	0.727782	0.0582728	0.498792	0.0229266	0.790296
ANXA8	black	-0.152727	0.0747962	0.103798	0.227411	-0.0139879	0.871123	0.170066	0.0469415	0.200936	0.0185522	-0.0554611	0.519768	0.0153148	0.859019	0.00872601	0.919391	0.592836	2.30868e-14	0.144478	0.0921004	-0.04066	0.637107	0.0721157	0.40234	-0.174266	0.041685	-0.214722	0.0117458	-0.240785	0.00459244	0.218408	0.010347	-0.160478	0.0610276	-0.0704718	0.413179	0.00513758	0.952488	-0.150543	0.0790997	0.195006	0.0223982	-0.181529	0.0337586
MAB21L4	black	0.0370322	0.667467	0.185658	0.0298498	0.000616593	0.994294	0.0321316	0.709341	0.145915	0.0888749	-0.0561101	0.514886	-0.095091	0.269021	-0.00325241	0.969911	0.468459	7.79079e-09	0.302218	0.000331609	-0.0379533	0.659705	0.200085	0.019066	-0.121816	0.156177	-0.375291	6.22173e-06	-0.258649	0.00227495	0.116388	0.175604	-0.192274	0.0243895	-0.0608366	0.480061	-0.162575	0.0576824	-0.284918	0.000739362	0.0620461	0.471358	0.00091656	0.991519
GTSE1	black	-0.0341086	0.692335	0.228486	0.0072427	0.168886	0.0485128	-0.0142755	0.868497	0.0278313	0.74682	-0.173161	0.043017	-0.0183875	0.83112	-0.0387003	0.653437	0.805204	1.9525e-32	0.348075	3.07444e-05	-0.0685096	0.426339	0.17795	0.0374889	0.0148598	0.863166	-0.342731	4.13723e-05	-0.443604	5.66267e-08	0.155587	0.0694495	-0.314097	0.000185655	-0.171345	0.0452845	-0.215812	0.0113159	-0.368346	9.48424e-06	0.0321718	0.708994	0.044905	0.602335
RIPK2	black	-0.062491	0.468178	0.188138	0.0276923	-0.0280115	0.745237	-0.0143137	0.868149	0.0779063	0.365523	-0.0166897	0.846512	0.104744	0.223178	0.0320404	0.710129	0.519713	7.62495e-11	0.100105	0.244469	-0.0384278	0.65572	-0.054228	0.529107	-0.159072	0.0633587	-0.238712	0.00496675	-0.381678	4.18574e-06	0.373328	7.01611e-06	-0.182662	0.0326449	-0.156945	0.0670212	0.0622161	0.470142	-0.129499	0.1315	0.180393	0.0349074	0.0323442	0.707505
ZNF493	black	-0.0337753	0.695192	-0.114798	0.18162	-0.0357243	0.678549	-0.0524954	0.54237	-0.151208	0.0777693	0.034087	0.69252	-0.0449481	0.601985	0.0969712	0.259625	-0.447483	4.19828e-08	-0.136221	0.112461	-0.0136953	0.873796	-0.205563	0.015961	0.27449	0.00117051	0.298197	0.000401353	0.2429	0.00423668	-0.143818	0.0936116	0.143614	0.0940823	0.0395564	0.646282	-0.0710797	0.409151	0.127247	0.1384	-0.267283	0.00159155	0.247915	0.00348989
AC245041.1	black	-0.127551	0.137454	0.230274	0.00678789	-0.0904892	0.292982	0.0250894	0.771037	0.175528	0.0402052	-0.078527	0.361704	-0.0691582	0.421963	0.0595927	0.489101	0.456891	2.00015e-08	0.177179	0.0383358	-0.153898	0.0725686	-0.181243	0.0340445	-0.0736171	0.392589	-0.152904	0.0744564	-0.116541	0.175033	0.120469	0.160843	-0.285558	0.000718392	-0.181291	0.033996	-0.127777	0.136754	-0.0269886	0.754238	0.0873188	0.310289	0.0911492	0.28946
HIST1H2BJ	black	-0.135125	0.115411	0.199879	0.0191926	-0.0511323	0.552918	0.0283383	0.742369	0.0709078	0.410288	0.0584514	0.497475	0.100533	0.242447	0.117132	0.172843	0.573955	2.27043e-13	0.380815	4.41835e-06	-0.107316	0.21196	0.100796	0.241209	-0.142566	0.0965314	-0.183756	0.0316	-0.329389	8.48288e-05	0.239583	0.00480627	-0.371125	8.0213e-06	-0.20118	0.0184067	-0.183181	0.0321457	-0.336609	5.775e-05	0.0516555	0.548858	0.149066	0.0821214
FARSB	black	-0.00717138	0.933716	0.216305	0.0111258	0.287511	0.000657732	0.0293771	0.733275	0.158913	0.0636267	-0.0377934	0.66105	-0.0155094	0.857246	0.0182198	0.832637	0.470217	6.72956e-09	0.369385	8.91027e-06	0.361709	1.4063e-05	0.104152	0.225823	-0.104001	0.226499	-0.148521	0.0832584	-0.122459	0.153987	0.00648807	0.940019	-0.368998	9.12027e-06	-0.254427	0.00269764	-0.293817	0.00049255	-0.431692	1.38728e-07	-0.288638	0.000624899	0.12589	0.142692
FAM111B	black	-0.0714904	0.406443	0.334023	6.63512e-05	0.14718	0.0861125	-0.134923	0.11596	0.00582639	0.946126	-0.0691565	0.421974	0.00290463	0.973127	-0.0803355	0.350719	0.731889	3.02134e-24	0.268187	0.00153204	-0.143677	0.0939353	-0.151037	0.0781089	-0.268599	0.00150563	-0.247577	0.00353621	-0.390439	2.39713e-06	0.207126	0.0151602	-0.344043	3.84822e-05	-0.120037	0.162358	-0.165734	0.0529294	-0.209504	0.0140087	0.101768	0.236681	0.250002	0.00321581
RRM2	black	-0.0562908	0.513531	0.163616	0.0560783	0.0796701	0.354736	-0.0413793	0.631156	0.0889078	0.301533	-0.0940207	0.274471	0.0158285	0.854342	-0.0550347	0.522988	0.83434	9.89268e-37	0.365046	1.15485e-05	-0.0209277	0.808211	0.0870094	0.312014	-0.121479	0.157335	-0.266614	0.0016369	-0.433314	1.2304e-07	0.218867	0.0101836	-0.33221	7.30798e-05	-0.15819	0.0648563	-0.221208	0.00938472	-0.419981	3.2391e-07	-0.0436913	0.61219	0.132211	0.123541
WDR12	black	-0.0150258	0.861653	0.100694	0.241688	0.21112	0.0132703	0.0527606	0.540329	0.0955063	0.266926	-0.00265243	0.97546	-0.000451737	0.99582	-0.0230932	0.788808	0.432337	1.32268e-07	0.130162	0.129518	0.176579	0.0390071	-0.271185	0.00134904	-0.29199	0.000535968	-0.261456	0.00202806	-0.0889552	0.301274	0.0713947	0.407073	-0.283828	0.000776388	-0.0747601	0.385261	-0.0897216	0.297112	-0.0810691	0.346322	0.0135927	0.874734	0.215267	0.011529
CDT1	black	-0.0599745	0.486317	0.129843	0.13047	0.260063	0.00214733	0.113374	0.187133	0.17945	0.035885	-0.129176	0.132473	-0.0211411	0.806293	-0.0985918	0.251709	0.77548	9.61164e-29	0.511993	1.60906e-10	0.262427	0.00194848	0.512823	1.4862e-10	0.101464	0.238092	-0.229049	0.00709674	-0.475992	4.13634e-09	0.0431328	0.616749	-0.356242	1.93261e-05	-0.321009	0.000130974	-0.369616	8.78676e-06	-0.653122	5.17997e-18	-0.216155	0.0111836	-0.0970505	0.259234
NDC1	black	-0.0609058	0.479561	0.222873	0.00885054	0.107985	0.209106	-0.0738801	0.390896	0.170911	0.0458411	-0.0252203	0.769875	0.0243036	0.778019	0.0398555	0.64379	0.646606	1.40706e-17	0.117702	0.170747	0.0391429	0.649734	-0.234145	0.00588934	-0.313914	0.000187353	-0.218865	0.0101843	-0.134851	0.116157	0.187722	0.0280447	-0.225045	0.00819446	-0.0223721	0.795256	-0.103898	0.226963	-0.105483	0.219913	0.0386768	0.653633	0.108453	0.207127
ITGA3	black	-0.122466	0.153965	0.223348	0.00870341	-0.091805	0.28599	0.0996691	0.246539	0.199541	0.0194016	-0.103409	0.229168	-0.0341914	0.691626	0.0179529	0.835053	0.657529	2.59846e-18	0.540362	9.4081e-12	-0.100291	0.243591	0.156936	0.0670372	0.0553934	0.520278	-0.223953	0.00851887	-0.403769	9.94877e-07	0.0987684	0.250856	-0.537614	1.25323e-11	-0.362068	1.37695e-05	-0.327065	9.58107e-05	-0.402839	1.05919e-06	0.0138723	0.872179	0.149555	0.0811094
S100A2	black	-0.146688	0.0871783	0.133569	0.119699	0.029437	0.732751	0.15864	0.0640883	0.225143	0.00816571	-0.0693331	0.420787	0.0232783	0.787156	-0.106497	0.215487	0.634265	8.75224e-17	0.251942	0.00297852	0.125676	0.143378	0.185279	0.0301914	-0.0532973	0.536211	-0.192254	0.0244045	-0.168109	0.0495722	0.109782	0.201583	-0.262507	0.00194212	-0.14842	0.0834705	-0.187241	0.0284565	-0.272317	0.00128527	0.0434069	0.61451	-0.224814	0.008262
TK1	black	-0.00957696	0.91156	0.153497	0.0733244	0.125216	0.14486	0.0755755	0.380085	0.140157	0.102355	-0.161328	0.0596533	0.0209548	0.807968	-0.0583399	0.498297	0.802478	4.51992e-32	0.401515	1.15755e-06	0.082536	0.337637	0.394922	1.79099e-06	-0.0286718	0.739445	-0.200109	0.0190518	-0.449286	3.64852e-08	0.166455	0.0518901	-0.304043	0.000303813	-0.252153	0.00295372	-0.215284	0.0115224	-0.50896	2.14676e-10	-0.0678667	0.430703	-0.15413	0.0721326
NCAPD2	black	-0.113388	0.187079	0.187579	0.028166	0.0743937	0.387601	0.0119639	0.889643	0.103482	0.228837	-0.0824785	0.337975	-0.012988	0.880264	0.118181	0.168999	0.456245	2.10622e-08	-0.0588224	0.494745	0.0510251	0.553752	-0.197418	0.0207581	-0.0586793	0.495797	-0.108248	0.207994	-0.0903989	0.293466	0.0993664	0.247984	0.0173264	0.840732	0.0486963	0.572013	-0.00165573	0.98468	-0.000251494	0.997673	0.0103466	0.904485	0.0205529	0.811582
PMS2P1	black	-0.065387	0.447772	-0.0450003	0.601564	0.0191133	0.824559	0.172409	0.0439443	0.123291	0.151191	-0.0226911	0.792402	0.0421609	0.624717	-0.115602	0.17856	0.42721	1.92645e-07	0.199747	0.019274	0.344913	3.66721e-05	0.151551	0.0770882	-0.0935209	0.277042	-0.304056	0.000303631	-0.208409	0.0145288	0.00223674	0.979305	-0.0456617	0.596226	-0.107593	0.210776	-0.227476	0.0075112	-0.309484	0.000233242	-0.169782	0.0473162	-0.0726138	0.399089
PATL1	black	-0.0211233	0.806453	0.216269	0.0111399	0.00129888	0.987981	0.091325	0.288528	0.0538903	0.531679	0.0305453	0.723092	0.0203174	0.813701	0.0372508	0.665621	0.434854	1.0973e-07	0.319553	0.000141061	-0.398532	1.41192e-06	-0.334754	6.3804e-05	0.117164	0.172723	-0.339076	5.05317e-05	-0.401889	1.12891e-06	0.288798	0.000620367	-0.481197	2.64689e-09	-0.24668	0.00366193	-0.163686	0.0559723	-0.109889	0.201142	0.127703	0.136981	0.632401	1.14531e-16
IRAK2	black	-0.059957	0.486444	0.20274	0.0175014	-0.163098	0.0568715	0.0596259	0.488859	0.170156	0.0468229	0.0718737	0.403925	0.159871	0.0620244	0.0233897	0.786162	0.505681	2.92255e-10	0.313773	0.000188679	-0.152425	0.0753802	-0.0223617	0.795348	-0.103561	0.228478	-0.265008	0.00175061	-0.346703	3.31965e-05	0.352596	2.38148e-05	-0.303093	0.000318003	-0.223121	0.00877352	-0.134585	0.116885	-0.284419	0.000756106	-0.0269506	0.754573	0.23438	0.00583838
SERPINB5	black	0.00366834	0.966065	0.187748	0.0280221	0.0105101	0.902983	0.0800438	0.352476	0.176466	0.0391345	-0.0369362	0.668279	-0.0067313	0.937775	-0.0349689	0.684982	0.602184	7.03865e-15	0.512195	1.57832e-10	-0.0515578	0.549615	0.0554855	0.519584	-0.0664075	0.440702	-0.294023	0.00048787	-0.339128	5.03881e-05	0.153221	0.0738487	-0.510494	1.85616e-10	-0.282258	0.000832686	-0.296918	0.000426229	-0.376989	5.60393e-06	0.00244261	0.9774	0.276035	0.00109475
CDC20	black	-0.0729907	0.39664	0.212175	0.0128068	0.103113	0.230512	0.0616972	0.47386	0.190552	0.0257211	-0.113149	0.188017	0.0392032	0.64923	-0.0376714	0.662077	0.861549	1.42411e-41	0.375662	6.08137e-06	0.128058	0.135886	0.352229	2.43171e-05	-0.00338809	0.968656	-0.295377	0.000458069	-0.392583	2.08629e-06	0.249612	0.00326552	-0.274441	0.00117302	-0.209097	0.0142002	-0.221957	0.00914105	-0.509861	1.97109e-10	-0.0731514	0.395598	-0.139983	0.102788
GSTM2	black	0.0503011	0.559399	-0.203106	0.0172946	-0.0365152	0.671839	-0.0449939	0.601615	-0.0179952	0.83467	0.0764452	0.374611	0.0640699	0.45699	0.0237398	0.78304	-0.543541	6.7307e-12	-0.428042	1.81316e-07	0.161988	0.0586039	0.193551	0.0234407	0.40258	1.0778e-06	0.152572	0.075095	0.344014	3.85447e-05	-0.136755	0.111046	0.487621	1.50977e-09	0.156365	0.0680494	0.205748	0.0158644	0.307694	0.000254568	0.0182471	0.83239	-0.462177	1.30566e-08
MCM6	black	-0.0505169	0.557713	0.0297565	0.729962	0.206152	0.0156552	-0.101425	0.238271	0.0384034	0.655925	-0.125686	0.143344	-0.00451153	0.958272	-0.0424027	0.62273	0.500467	4.74173e-10	-0.271886	0.0013092	0.0729881	0.396657	-0.277324	0.00103493	-0.387658	2.8662e-06	-0.265052	0.00174742	-0.0967397	0.260769	0.170758	0.0460391	0.179186	0.0361635	0.250329	0.00317463	0.1933	0.0236251	0.197752	0.0205398	0.306209	0.000273631	-0.177419	0.038071
KIF4A	black	-0.0738873	0.390849	0.295566	0.000454047	0.0963071	0.262918	0.0618568	0.472714	0.139721	0.103439	-0.0808453	0.34766	0.0140119	0.870904	-0.0408894	0.635206	0.921444	2.75616e-57	0.437686	8.87595e-08	-0.0477673	0.579376	0.0574648	0.504774	-0.174938	0.0408911	-0.323896	0.000112932	-0.420843	3.04645e-07	0.28364	0.000782954	-0.45948	1.62454e-08	-0.301294	0.000346565	-0.243327	0.00416789	-0.430959	1.46421e-07	0.00714986	0.933914	0.173338	0.0428013
ANLN	black	-0.0485025	0.573546	0.298051	0.000404113	0.0192177	0.823615	0.0694714	0.419859	0.175464	0.0402789	-0.0905633	0.292585	-0.000183726	0.9983	-0.00125219	0.988413	0.865345	2.49162e-42	0.426916	1.968e-07	-0.198494	0.0200604	-0.11775	0.170572	-0.119663	0.163682	-0.307306	0.000259428	-0.381838	4.14411e-06	0.136606	0.111439	-0.583338	7.4256e-14	-0.338854	5.11425e-05	-0.257103	0.00242218	-0.266487	0.00164567	0.13678	0.110982	0.246922	0.00362768
TACC3	black	-0.0769149	0.371674	-0.0219915	0.798665	0.20278	0.0174791	-0.0130371	0.879815	-0.0139072	0.87186	-0.15365	0.073036	-0.0897934	0.296724	-0.0704418	0.413379	0.548499	3.9643e-12	0.185047	0.0304029	0.128779	0.133676	0.48618	1.714e-09	0.0998176	0.245833	-0.271454	0.00133364	-0.323216	0.000116959	0.223183	0.00875422	0.0620024	0.471671	-0.0389413	0.651419	-0.131611	0.125269	-0.464872	1.04752e-08	-0.170264	0.0466815	-0.23857	0.00499343
PRR11	black	-0.0877442	0.307929	0.25364	0.00278395	0.0380073	0.659252	0.102697	0.232405	0.196115	0.0216311	-0.052524	0.542149	0.0883319	0.304688	0.00352776	0.967365	0.765101	1.38505e-27	0.150476	0.0792341	-0.0897137	0.297155	-0.240647	0.00461645	-0.249147	0.00332562	-0.275308	0.00112982	-0.240682	0.0046103	0.204228	0.0166742	-0.31534	0.000174473	-0.126151	0.141859	-0.0515627	0.549577	-0.0713895	0.407107	0.197752	0.0205395	0.100978	0.240358
AC106795.1	black	-0.114206	0.183899	0.137665	0.108668	0.103568	0.228448	0.0246804	0.774668	-0.0311668	0.717693	-0.0807793	0.348055	-0.059919	0.486721	-0.128504	0.134516	0.520808	6.84813e-11	0.375274	6.22828e-06	0.337419	5.52805e-05	0.304368	0.000299102	-0.0845485	0.325948	-0.190423	0.0258231	-0.321786	0.000125872	0.144206	0.0927196	-0.310996	0.000216514	-0.338201	5.29897e-05	-0.226894	0.00767	-0.46657	9.10898e-09	-0.135022	0.11569	-0.084912	0.323865
PBXIP1	black	0.205124	0.0161929	-0.137533	0.109011	-0.139954	0.102859	-0.00472672	0.956283	-0.11031	0.199409	0.0830204	0.3348	-0.0138737	0.872167	-0.100642	0.241934	-0.532921	2.03278e-11	-0.349627	2.81766e-05	-0.0751495	0.382784	-0.136838	0.110829	-0.000266962	0.99753	0.00347306	0.967871	0.248065	0.00346955	-0.122332	0.154419	0.381945	4.11627e-06	0.21789	0.0105343	0.138451	0.106646	0.349039	2.91238e-05	0.00380006	0.964848	-0.0581383	0.499785
TMOD3	black	-0.131946	0.124301	0.186355	0.0292291	-0.18569	0.0298213	0.0596231	0.488879	0.0719215	0.403612	-0.0255497	0.766955	-0.0689008	0.423696	0.097088	0.259049	0.456158	2.12088e-08	0.256172	0.00251506	-0.488271	1.42538e-09	-0.453998	2.51833e-08	-0.142226	0.0973383	-0.248101	0.00346471	-0.207742	0.0148544	0.171456	0.0451443	-0.457658	1.88099e-08	-0.155753	0.0691484	-0.165469	0.053315	0.0417879	0.627786	0.226466	0.0077887	0.502397	3.96775e-10
SNRPB	black	0.0622599	0.469829	0.0237014	0.783382	0.240852	0.00458063	0.094037	0.274388	-0.0532041	0.536925	-0.185887	0.0296447	-0.0773788	0.368788	-0.0998074	0.245881	0.506621	2.67617e-10	0.395349	1.74159e-06	0.22477	0.00827495	0.438843	8.13466e-08	0.110623	0.198128	-0.244796	0.0039389	-0.316146	0.000167565	0.196889	0.0211091	-0.206832	0.0153078	-0.359866	1.5664e-05	-0.305092	0.000288829	-0.5382	1.17912e-11	-0.217411	0.0107103	-0.0752	0.382463
DIABLO	black	-0.00843973	0.922027	0.135589	0.114155	-0.033757	0.695348	0.135544	0.114277	0.169472	0.0477269	-0.0467208	0.587723	0.0531129	0.537624	0.0152613	0.859507	0.50826	2.29349e-10	0.26788	0.00155202	0.088609	0.303167	-0.0766566	0.373288	-0.211982	0.0128906	-0.231958	0.00638305	-0.294765	0.000471326	0.162367	0.0580076	-0.322279	0.000122731	-0.261067	0.00206075	-0.174206	0.0417558	-0.250466	0.00315756	-0.0486802	0.572141	0.175721	0.039983
FBXO9	black	0.0313705	0.715927	-0.143662	0.0939709	0.0455473	0.597147	-0.167361	0.0506096	-0.07898	0.358932	-0.00906756	0.916247	-0.0544048	0.527762	0.0517632	0.548024	-0.54953	3.54694e-12	-0.307944	0.000251485	0.120277	0.161516	-0.0194396	0.821613	0.354888	2.08913e-05	0.424663	2.31662e-07	0.471091	6.25521e-09	-0.362359	1.35354e-05	0.286018	0.000703662	0.177734	0.0377248	0.0452063	0.599899	0.23901	0.00491123	-0.235527	0.00559522	-0.183759	0.0315966
FSCN1	black	-0.0876059	0.308695	-0.081752	0.342262	0.0317019	0.713057	0.160756	0.0605754	0.189595	0.0264876	-0.0494265	0.566257	-0.0552649	0.521248	-0.0252985	0.769182	0.517974	9.0367e-11	0.173622	0.0424574	-0.0106725	0.901491	0.303875	0.000306276	0.0773475	0.368982	-0.381888	4.13097e-06	-0.347907	3.10358e-05	0.158084	0.0650385	-0.147619	0.0851701	-0.165275	0.0535994	-0.0744475	0.387258	-0.162872	0.0572215	0.312023	0.00020581	-0.257148	0.0024178
PTGES	black	-0.130956	0.127177	0.149743	0.0807234	-0.0309963	0.719173	0.126294	0.141403	0.207588	0.01493	-0.143547	0.0942378	-0.0939488	0.27484	-0.128969	0.133098	0.518714	8.40715e-11	0.194119	0.0230292	0.0529536	0.538847	0.0840926	0.328573	-0.113359	0.187191	-0.188587	0.0273163	-0.239982	0.00473426	0.0408326	0.635677	-0.196131	0.0216202	-0.101773	0.236656	-0.161505	0.0593698	-0.125401	0.144262	0.229106	0.00708205	-0.202337	0.0177314
MKI67	black	-0.0721326	0.40223	0.269802	0.00143085	0.136054	0.112908	0.0606361	0.481512	0.135461	0.1145	-0.0435994	0.612939	0.0276526	0.748391	-0.0768833	0.371872	0.801577	5.94694e-32	0.42194	2.8171e-07	0.024439	0.776814	0.0406755	0.636978	-0.0425491	0.621528	-0.302351	0.000329515	-0.426224	2.06944e-07	0.257155	0.00241708	-0.395561	1.71754e-06	-0.262201	0.00196677	-0.242553	0.00429332	-0.45209	2.92833e-08	-0.102209	0.234645	0.305643	0.000281236
ABLIM3	black	-0.0117314	0.891774	0.187874	0.0279153	-0.0711152	0.408917	0.219332	0.0100204	0.0529525	0.538855	-0.112708	0.189754	-0.070053	0.415968	-0.0981478	0.253861	0.525779	4.18414e-11	0.428201	1.79225e-07	-0.194093	0.023048	0.0370774	0.667086	-0.108289	0.207819	-0.296352	0.000437668	-0.356192	1.93828e-05	-0.0849944	0.323394	-0.45336	2.64889e-08	-0.354126	2.18239e-05	-0.280054	0.000918077	-0.230923	0.00662929	0.129722	0.13083	0.161268	0.0597496
SLC35E2B	black	0.0256529	0.766041	-0.0621386	0.470696	-0.0595282	0.489573	-0.126948	0.139338	-0.179825	0.0354933	0.102588	0.232904	-0.0161342	0.851561	0.0587836	0.49503	-0.506162	2.79379e-10	-0.365183	1.14553e-05	-0.256679	0.00246406	-0.171288	0.0453579	0.22505	0.00819288	0.0905659	0.292571	0.157291	0.0664135	-0.0674156	0.43378	0.3386	5.18546e-05	0.289719	0.000594855	0.176271	0.0393552	0.370003	8.58432e-06	0.0877584	0.30785	0.0182494	0.832369
GAPDH	black	-0.0635116	0.46093	0.166627	0.0516457	-0.0259085	0.763778	0.132196	0.123583	0.154045	0.0722922	-0.100806	0.241166	-0.0331935	0.700188	-0.00250285	0.976843	0.744165	2.02421e-25	0.49065	1.15394e-09	-0.0333036	0.699242	0.106362	0.216073	0.0562219	0.514048	-0.452917	2.74324e-08	-0.441647	6.5762e-08	0.0412219	0.632456	-0.5412	8.6166e-12	-0.462612	1.26019e-08	-0.298757	0.000390877	-0.359408	1.60882e-05	0.100285	0.243616	0.145953	0.0887912
KRT16	black	-0.106011	0.217601	0.111719	0.193695	0.0203607	0.813311	0.172826	0.0434282	0.137059	0.110249	-0.14153	0.0990043	-0.0560437	0.515385	-0.071094	0.409057	0.580545	1.03953e-13	0.397959	1.46654e-06	0.0715784	0.405864	0.309567	0.000232292	0.0480409	0.577204	-0.312812	0.000197915	-0.347111	3.24491e-05	-0.0115625	0.893324	-0.331329	7.65717e-05	-0.271426	0.00133523	-0.218412	0.0103456	-0.356223	1.93482e-05	0.0885706	0.303377	-0.119428	0.164518
HJURP	black	-0.078054	0.364612	0.235357	0.00563073	0.0914553	0.287837	0.0960025	0.264437	0.137232	0.109795	-0.120359	0.161229	-0.0229736	0.789877	-0.0478655	0.578596	0.915357	3.45081e-55	0.488697	1.37261e-09	0.0206835	0.810406	0.183763	0.0315928	-0.0130661	0.879549	-0.333925	6.66997e-05	-0.47331	5.19118e-09	0.243039	0.00421421	-0.47554	4.29855e-09	-0.361235	1.44595e-05	-0.313549	0.000190794	-0.50872	2.19611e-10	-0.0424476	0.622362	0.106975	0.213423
ZNHIT3	black	-0.144563	0.091905	0.274273	0.00118155	0.127825	0.136605	0.0602382	0.484399	0.070234	0.414761	-0.0220117	0.798483	-0.0290025	0.73655	0.0189323	0.826194	0.512098	1.59289e-10	0.317548	0.00015614	0.386156	3.15441e-06	0.299492	0.000377538	-0.185329	0.0301465	-0.0918504	0.285751	-0.265414	0.00172118	0.0503389	0.559103	-0.205915	0.0157776	-0.232217	0.00632275	-0.268908	0.00148607	-0.427868	1.83625e-07	-0.104193	0.225638	-0.202471	0.0176549
INTS8	black	-0.0584598	0.497413	0.164523	0.0547122	0.0814736	0.343914	0.0796928	0.354598	0.0707855	0.411098	-0.00313354	0.97101	0.0136933	0.873815	0.0141663	0.869494	0.375158	6.27265e-06	0.136492	0.111742	0.08959	0.297824	-0.158155	0.0649165	0.0244741	0.776503	-0.101371	0.238524	-0.244383	0.00400211	0.182998	0.0323211	-0.208398	0.0145342	-0.123228	0.151399	-0.147361	0.085722	-0.196559	0.0213301	-0.0820413	0.340551	0.240251	0.0046863
CKS2	black	-0.0692871	0.421096	0.244021	0.00405822	0.0720573	0.402722	0.113035	0.188463	0.119406	0.164594	-0.100168	0.244171	0.0455625	0.597025	0.00521319	0.951789	0.848354	4.17176e-39	0.402605	1.07599e-06	0.127999	0.136067	0.175843	0.039843	-0.110101	0.200268	-0.345003	3.64891e-05	-0.475463	4.32656e-09	0.277856	0.00101114	-0.360866	1.47747e-05	-0.2966	0.000432627	-0.226765	0.00770577	-0.472289	5.65726e-09	-0.0322448	0.708364	0.0497778	0.563498
KIF2C	black	-0.0571451	0.507152	0.213627	0.012192	0.118648	0.167309	0.0239401	0.781255	0.142728	0.0961495	-0.104608	0.223783	0.0121172	0.888238	-0.111557	0.194346	0.884793	1.31328e-46	0.343475	3.97092e-05	0.0459096	0.594231	0.218071	0.0104686	-0.0780365	0.36472	-0.358821	1.66465e-05	-0.427645	1.86641e-07	0.269069	0.00147599	-0.294597	0.000475026	-0.209704	0.0139154	-0.182784	0.0325273	-0.425042	2.2542e-07	0.0240695	0.780102	-0.0574513	0.504874
AC092718.4	black	-0.0476965	0.57994	0.0719974	0.403114	0.0758722	0.378212	-0.00100558	0.990695	0.018693	0.828356	-0.196788	0.0211767	-0.0265513	0.758096	-0.034394	0.689893	0.574944	2.02145e-13	0.24199	0.00438647	0.223723	0.00858845	0.492804	9.5163e-10	0.0293762	0.733283	-0.128485	0.134573	-0.176437	0.0391671	0.0699177	0.416871	-0.106575	0.215148	-0.241721	0.00443175	-0.162629	0.0575985	-0.415708	4.37887e-07	-0.130347	0.128968	-0.407695	7.62244e-07
ZBED2	black	-0.0932802	0.278286	0.17782	0.037631	-0.102182	0.234771	0.13853	0.106443	0.224638	0.00831399	-0.182914	0.0324012	-0.140894	0.100545	-0.06837	0.427284	0.496382	6.88848e-10	0.0415197	0.629997	0.035736	0.67845	-0.024733	0.774201	-0.180728	0.0345645	-0.125469	0.144042	-0.168342	0.0492526	0.170314	0.0466158	-0.0679313	0.430263	-0.00317363	0.97064	0.00495113	0.95421	-0.0380933	0.658529	0.234314	0.00585261	-0.21944	0.00998272
LAMB3	black	0.0492508	0.56764	0.218513	0.0103093	-0.00858613	0.920678	0.19115	0.0252519	0.161592	0.0592313	-0.0173	0.840972	0.0199191	0.817288	-0.033092	0.701061	0.634942	7.93357e-17	0.672567	2.25741e-19	-0.131553	0.125435	0.168892	0.0485048	0.040912	0.635019	-0.309085	0.000237841	-0.43397	1.17189e-07	0.00601852	0.944353	-0.645804	1.58851e-17	-0.470497	6.57414e-09	-0.383615	3.70563e-06	-0.499449	5.20686e-10	-0.0756691	0.379494	0.334562	6.44648e-05
MRRF	black	-0.0349368	0.685256	0.164702	0.0544442	0.249788	0.00324298	0.0954401	0.267259	0.0747678	0.385212	-0.0549569	0.523577	0.0264958	0.758587	-0.0965903	0.26151	0.419465	3.36002e-07	0.606917	3.80007e-15	0.355267	2.04416e-05	0.333842	6.69939e-05	0.223293	0.0087203	-0.128171	0.135538	-0.349446	2.84645e-05	-0.135414	0.114627	-0.436183	9.93539e-08	-0.348916	2.93265e-05	-0.569103	3.99088e-13	-0.630737	1.45386e-16	-0.41045	6.31012e-07	0.199461	0.0194508
MRPL15	black	0.00682657	0.936896	0.16555	0.0531968	0.250305	0.00317758	-0.0396137	0.645804	0.137799	0.10832	-0.187334	0.0283763	-0.107205	0.212434	-0.0372193	0.665888	0.489418	1.28756e-09	0.132906	0.121562	0.145271	0.0903093	-0.0133747	0.876727	-0.264478	0.0017897	-0.0716611	0.405321	-0.211156	0.0132544	0.167344	0.0506339	-0.190765	0.0255533	-0.181337	0.03395	-0.0965062	0.261928	-0.160554	0.060904	0.0407289	0.636535	-0.0437967	0.611331
ACACB	black	0.0913238	0.288534	-0.133411	0.12014	-0.0115333	0.893591	-0.0606228	0.481609	-0.0658855	0.44431	0.0505337	0.557582	-0.00531227	0.950874	0.110338	0.199297	-0.692709	6.77546e-21	-0.478566	3.31998e-09	0.0591216	0.492549	-0.183488	0.0318527	0.0664112	0.440675	0.400114	1.27104e-06	0.605995	4.2886e-15	-0.218597	0.0102794	0.456442	2.07323e-08	0.290722	0.000568155	0.213899	0.0120799	0.410115	6.45725e-07	-0.180883	0.0344075	-0.149661	0.0808921
LINP1	black	-0.172534	0.0437889	0.160357	0.0612245	0.0375362	0.663215	0.0522916	0.54394	0.0774886	0.368107	-0.0606751	0.48123	-0.068338	0.427501	-0.037135	0.666599	0.464763	1.057e-08	0.329615	8.38243e-05	-0.00308432	0.971466	0.0943981	0.272541	-0.248498	0.00341125	-0.136226	0.112447	-0.214363	0.0118904	0.169947	0.0470979	-0.321614	0.000126987	-0.278913	0.000965386	-0.218362	0.0103637	-0.270499	0.00138905	0.011943	0.889835	0.058188	0.499418
CCNA2	black	-0.123338	0.151033	0.235557	0.00558901	0.099312	0.248245	0.000175868	0.998373	0.154069	0.0722478	-0.0562503	0.513835	0.0346255	0.687913	-0.0718752	0.403915	0.859705	3.26016e-41	0.364975	1.15974e-05	0.0228072	0.791364	0.0654915	0.447045	-0.0912186	0.289092	-0.268446	0.00151544	-0.450719	3.26147e-08	0.237802	0.00513949	-0.366444	1.06274e-05	-0.256742	0.00245784	-0.244704	0.00395293	-0.433239	1.23721e-07	-0.0554908	0.519544	0.149855	0.0804943
PCNA	black	-0.0840772	0.328662	0.13036	0.128932	0.268366	0.00152055	-0.0965709	0.261606	0.00592101	0.945253	-0.128845	0.133477	-0.059611	0.488967	-0.0350119	0.684615	0.499623	5.12435e-10	-0.0157355	0.855188	0.00664447	0.938576	-0.0944853	0.272096	-0.186027	0.0295198	-0.0695652	0.41923	-0.0508664	0.554988	0.247716	0.00351713	-0.0377404	0.661496	0.0466089	0.588619	0.0151551	0.860474	-0.0771712	0.370078	0.0284005	0.741823	-0.0630968	0.463868
UHRF1	black	-0.0887854	0.302201	0.197427	0.0207525	0.168283	0.0493338	-0.0216005	0.80217	0.0803824	0.350436	-0.156877	0.0671409	-0.0638952	0.45822	-0.117836	0.170256	0.81781	3.36233e-34	0.373818	6.80942e-06	-0.0502749	0.559604	0.0668965	0.437336	-0.0768004	0.372389	-0.334369	6.5135e-05	-0.450397	3.34484e-08	0.166398	0.0519722	-0.386642	3.05818e-06	-0.257609	0.00237312	-0.239139	0.00488748	-0.339306	4.99018e-05	0.0998777	0.245547	0.140203	0.102242
DUSP7	black	-0.0395365	0.646448	0.00814825	0.924712	0.0920098	0.284912	0.0934236	0.277544	0.19155	0.0249423	0.0214692	0.803348	-0.0331587	0.700488	-0.11637	0.175673	0.398655	1.40048e-06	0.186695	0.0289306	-0.232726	0.00620557	0.13018	0.129464	-0.113361	0.187183	-0.331129	7.73884e-05	-0.20294	0.0173882	0.0944943	0.27205	-0.211321	0.0131806	-0.0574248	0.505071	-0.0461703	0.592136	-0.0426651	0.620577	0.372258	7.48823e-06	-0.108162	0.208356
TRIP13	black	-0.0772496	0.36959	0.180295	0.0350075	0.108657	0.206268	0.0571088	0.507422	0.138598	0.106269	-0.112112	0.19212	0.0171056	0.842735	-0.0450043	0.601531	0.885443	9.16762e-47	0.339712	4.88115e-05	-0.00704959	0.934839	0.096714	0.260897	-0.111972	0.192681	-0.356695	1.88286e-05	-0.415947	4.30634e-07	0.203121	0.0172862	-0.385391	3.31151e-06	-0.233409	0.0060515	-0.184633	0.030782	-0.339722	4.87845e-05	0.103264	0.229825	-0.00801103	0.925976
MTFR1L	black	0.0376987	0.661847	-0.0807183	0.348421	-0.0523902	0.54318	-0.054579	0.52644	-0.0865074	0.314824	0.139583	0.103782	0.0627286	0.466485	0.0311276	0.718033	-0.389243	2.58917e-06	-0.271684	0.00132056	0.046114	0.592588	0.158795	0.063825	0.109742	0.201747	0.247914	0.00349005	0.316192	0.000167172	-0.156454	0.0678911	0.260128	0.00214169	0.0473202	0.582935	0.183331	0.032002	0.230207	0.00680455	0.0548824	0.52414	-0.458471	1.76209e-08
CDH3	black	-0.0572819	0.506134	0.10145	0.238158	-0.0474225	0.58212	0.0764387	0.374652	0.187221	0.0284736	-0.0226497	0.792772	0.0699325	0.416772	-0.0401485	0.641353	0.655862	3.37771e-18	0.368233	9.54894e-06	-0.1982	0.0202494	0.082175	0.339761	-0.038217	0.657489	-0.381588	4.20949e-06	-0.48472	1.9482e-09	0.282751	0.000814618	-0.390487	2.38974e-06	-0.23146	0.00650058	-0.0624332	0.468591	-0.26324	0.00188407	0.236139	0.00546924	0.139128	0.104925
AC099850.3	black	-0.0546664	0.525777	0.236119	0.00547333	0.045916	0.594179	0.106927	0.213627	0.19071	0.0255966	-0.0637823	0.459017	0.040315	0.639969	0.0117886	0.89125	0.732353	2.73501e-24	0.136498	0.111726	-0.105734	0.218813	-0.303024	0.000319059	-0.213558	0.0122208	-0.303641	0.000309751	-0.260638	0.00209735	0.201741	0.018077	-0.299309	0.00038081	-0.0759178	0.377925	-0.0724101	0.400417	-0.0435654	0.613216	0.194073	0.023062	0.184057	0.0313171
COX6B2	black	-0.0166133	0.847206	0.102589	0.2329	-0.0350347	0.684421	0.118746	0.166959	0.141462	0.0991667	-0.0644833	0.454085	-0.00913974	0.915582	-0.115446	0.179151	0.527357	3.5726e-11	0.353879	2.21336e-05	-0.103392	0.229242	0.248748	0.00337813	0.16988	0.047186	-0.309958	0.00022787	-0.37131	7.9322e-06	0.23683	0.00532998	-0.298491	0.000395822	-0.242264	0.00434093	-0.183524	0.0318187	-0.310673	0.000219999	0.119967	0.162606	-0.0575466	0.504167
CSE1L	black	-0.118576	0.167571	0.192409	0.0242879	0.214754	0.0117331	0.00170378	0.984235	0.224734	0.00828559	-0.0207773	0.809563	-0.0576215	0.503611	0.0230621	0.789086	0.515213	1.18111e-10	-0.131434	0.125782	0.164955	0.0540699	-0.340887	4.57768e-05	-0.335504	6.1289e-05	0.0044602	0.958746	0.0667107	0.438613	0.200328	0.0189182	-0.0917431	0.286317	0.0512309	0.552152	0.0478842	0.578447	0.0852621	0.321867	0.0988535	0.250446	-0.090247	0.294281
AC004816.1	black	-0.0293202	0.733772	0.0514974	0.550083	0.0310857	0.718397	0.182291	0.0330061	0.132672	0.122226	-0.0845379	0.326009	-0.0479167	0.578189	-0.113842	0.185308	0.52622	4.00383e-11	0.36264	1.33135e-05	0.164209	0.055182	0.272465	0.00127716	0.0227806	0.791602	-0.0652492	0.448731	-0.10889	0.205291	0.015424	0.858025	-0.310919	0.000217343	-0.252625	0.00289881	-0.289653	0.00059664	-0.403605	1.00596e-06	-0.143338	0.0947215	-0.154414	0.0716043
KIF11	black	-0.0910626	0.289921	0.251949	0.00297764	0.140472	0.101578	0.0494161	0.566339	0.123861	0.149293	-0.0955643	0.266634	0.00441905	0.959126	-0.0838502	0.329974	0.823326	5.14465e-35	0.40728	7.84173e-07	-0.00116897	0.989183	0.0137571	0.873232	-0.0815691	0.343347	-0.328117	9.06816e-05	-0.443932	5.52205e-08	0.293628	0.000496901	-0.381257	4.29769e-06	-0.272529	0.00127364	-0.255452	0.00258896	-0.42698	1.95881e-07	-0.0726937	0.398569	0.296748	0.000429636
LRRC8A	black	-0.0375664	0.662961	0.14772	0.0849529	0.0242673	0.778342	0.139241	0.104641	0.135624	0.114061	-0.0657327	0.44537	-0.0489707	0.569847	-0.0888676	0.301752	0.521266	6.54658e-11	0.467765	8.25215e-09	-0.180955	0.0343346	0.0753445	0.381547	-0.0669218	0.437162	-0.31411	0.000185533	-0.336611	5.77463e-05	-0.0485888	0.572863	-0.455445	2.24492e-08	-0.253595	0.00278889	-0.255816	0.00255136	-0.250389	0.00316717	0.153468	0.0733804	0.196673	0.0212534
ZWINT	black	-0.0274165	0.750468	0.215037	0.01162	0.157272	0.0664472	0.0222239	0.796583	0.0883354	0.304668	-0.121613	0.156874	0.00184478	0.982931	-0.0508168	0.555374	0.830016	4.82759e-36	0.515036	1.20146e-10	0.0444719	0.605843	0.282138	0.000837139	0.0270393	0.753791	-0.259454	0.00220144	-0.464455	1.08404e-08	0.271094	0.00135429	-0.424098	2.41289e-07	-0.327682	9.27692e-05	-0.309831	0.000229293	-0.604724	5.06233e-15	-0.191291	0.0251421	0.161195	0.0598658
ZNF185	black	-0.081369	0.344536	0.198294	0.020189	-0.121443	0.157459	0.0830419	0.334674	0.123713	0.149784	0.00685474	0.936636	-0.00224674	0.979212	-0.0677515	0.431487	0.580491	1.04623e-13	0.298811	0.000389889	-0.196042	0.0216807	-0.0906441	0.292152	-0.185158	0.0303013	-0.187505	0.02823	-0.240051	0.00472198	0.1475	0.0854239	-0.387722	2.85439e-06	-0.186049	0.0295006	-0.0707832	0.411113	-0.162972	0.0570668	0.165418	0.0533887	0.090548	0.292667
NMU	black	0.0396027	0.645896	0.193814	0.0232494	0.0653029	0.448357	0.137631	0.108756	0.181964	0.0333277	-0.0180021	0.834607	0.0583988	0.497863	-0.0382835	0.656931	0.597445	1.29141e-14	0.568296	4.37969e-13	0.0261573	0.761578	0.261732	0.00200518	-0.0161637	0.851293	-0.194402	0.0228263	-0.334605	6.43168e-05	0.0779732	0.36511	-0.479184	3.14857e-09	-0.354256	2.16615e-05	-0.320857	0.000132	-0.506412	2.7291e-10	-0.131107	0.126734	0.13489	0.116049
CDC25B	black	-0.0740956	0.389511	-0.0463622	0.590596	0.173559	0.042534	0.115579	0.178648	0.0468139	0.586978	-0.21257	0.0126369	-0.0666233	0.439214	-0.103325	0.229547	0.385562	3.27587e-06	0.0637374	0.459334	0.135027	0.115676	0.267796	0.00155755	0.15517	0.0702097	-0.289269	0.000607196	-0.253455	0.00280456	0.322178	0.000123368	0.0537725	0.532578	-0.097185	0.258571	-0.0605276	0.482298	-0.236144	0.00546823	0.0131504	0.878778	-0.138621	0.106211
GCSH	black	-0.134295	0.117682	0.22286	0.00885456	0.0919634	0.285156	0.0671665	0.435484	0.258244	0.00231273	-0.0764624	0.374503	-0.0660204	0.443376	-0.0627697	0.466192	0.573185	2.48446e-13	0.223179	0.00875542	0.295237	0.000461076	0.085296	0.321674	-0.352491	2.39569e-05	-0.0445103	0.605531	-0.142771	0.09605	-0.0884265	0.304168	-0.310866	0.000217907	-0.212161	0.0128129	-0.15106	0.0780623	-0.192512	0.0242103	0.108128	0.208502	-0.232576	0.00623995
TOMM5	black	-0.0226641	0.792643	0.0802503	0.351231	0.183429	0.0319094	-0.0535576	0.534219	-0.0821166	0.340106	-0.130217	0.129354	-0.055192	0.521799	-0.0942842	0.273122	0.387535	2.88877e-06	0.189452	0.0266043	0.354817	2.09769e-05	0.272064	0.0012993	-0.15871	0.0639705	-0.0411532	0.633024	-0.157494	0.0660604	0.010972	0.898742	-0.116147	0.176508	-0.149603	0.0810105	-0.183725	0.0316288	-0.329173	8.57982e-05	-0.16921	0.0480781	-0.200426	0.0188589
DTL	black	-0.106908	0.213712	0.257714	0.00236297	0.213933	0.0120661	-0.0182492	0.832371	0.0922525	0.283638	-0.103978	0.226603	-0.058303	0.49857	-0.106707	0.214578	0.782662	1.39373e-29	0.352358	2.41395e-05	-0.0110035	0.898453	-0.0928761	0.280382	-0.211423	0.0131356	-0.250045	0.00321033	-0.327266	9.48102e-05	0.145769	0.0891986	-0.439751	7.59531e-08	-0.236892	0.0053178	-0.230208	0.00680419	-0.304461	0.000297763	0.00212976	0.980294	0.227458	0.00751602
UBE2C	black	-0.049736	0.563826	0.176045	0.0396118	0.128623	0.134152	0.104068	0.226198	0.157166	0.0666324	-0.154593	0.0712719	0.0143806	0.867537	-0.0620661	0.471215	0.8763	1.18914e-44	0.489453	1.28357e-09	0.134966	0.115844	0.406778	8.11453e-07	0.0393941	0.647636	-0.277458	0.00102889	-0.47121	6.19337e-09	0.27004	0.00141645	-0.394533	1.83726e-06	-0.351916	2.47538e-05	-0.257711	0.0023633	-0.608372	3.13766e-15	-0.113448	0.186842	-0.0598307	0.487365
CDCA5	black	-0.0870987	0.311515	0.276215	0.00108619	0.16003	0.0617627	0.0590361	0.493175	0.148714	0.0828546	-0.0933322	0.278016	0.0537803	0.532518	-0.0873123	0.310325	0.914777	5.36608e-55	0.386028	3.18016e-06	0.112841	0.189229	0.216249	0.0111476	-0.188721	0.0272051	-0.26707	0.00160588	-0.442863	5.9935e-08	0.23563	0.00557399	-0.344328	3.78803e-05	-0.235186	0.00566656	-0.227353	0.0075445	-0.485751	1.77991e-09	-0.0353438	0.681786	-0.0313011	0.716528
CENPW	black	0.00335153	0.968995	-0.0105141	0.902946	0.153554	0.0732174	0.0914366	0.287936	0.0905118	0.292861	-0.145692	0.0893697	0.0618844	0.472517	-0.0608252	0.480144	0.559789	1.14893e-12	0.125782	0.143036	0.271476	0.00133236	0.382403	3.99947e-06	-0.0268117	0.755798	-0.172447	0.0438973	-0.210895	0.0133709	0.132734	0.122048	-0.0326111	0.705203	-0.159939	0.0619127	-0.0559742	0.515907	-0.325145	0.00010587	-0.0967824	0.260558	-0.366968	1.03001e-05
KPNA2	black	-0.0458766	0.594496	0.122621	0.153439	-0.00157302	0.985445	-0.0544382	0.527509	0.0713447	0.407403	-0.0973832	0.257597	0.0865808	0.314412	0.00944229	0.912799	0.554423	2.08202e-12	-0.183736	0.0316186	-0.0134826	0.875741	-0.226831	0.00768732	-0.29547	0.000456092	-0.294023	0.000487863	-0.0493449	0.566899	0.169052	0.0482899	0.0801716	0.351705	0.156819	0.0672438	0.144723	0.0915427	0.13522	0.115153	0.240524	0.00463813	-0.162323	0.0580762
USP5	black	-0.0707979	0.411015	0.0426712	0.620527	0.121276	0.158035	-0.0459534	0.593878	0.131536	0.125485	-0.163176	0.0567519	-0.119415	0.164564	0.116538	0.175045	0.190635	0.0256558	-0.165189	0.0537245	0.138181	0.107337	-0.0843931	0.326842	-0.201113	0.0184464	-0.0155731	0.856666	0.183512	0.0318301	-0.0139629	0.871351	0.108238	0.208035	0.0388704	0.652012	0.0965349	0.261785	0.139441	0.104139	0.0954743	0.267087	-0.252745	0.00288495
MELK	black	-0.0753878	0.381273	0.201125	0.0184394	0.134963	0.115852	0.0204284	0.812702	0.0885073	0.303725	-0.131619	0.125245	-0.012093	0.88846	-0.0741478	0.389177	0.818399	2.76053e-34	0.401002	1.19792e-06	-0.0301323	0.726686	0.0836732	0.331	-0.0537457	0.532782	-0.315417	0.0001738	-0.428534	1.74913e-07	0.21242	0.0127014	-0.425321	2.20909e-07	-0.29485	0.000469463	-0.270922	0.00136427	-0.39272	2.06789e-06	0.000673524	0.993768	0.152873	0.0745151
IQGAP3	black	-0.000378638	0.996496	0.182595	0.0327104	0.0879765	0.306645	0.0924641	0.28253	0.0958131	0.265386	-0.0625014	0.468104	0.0358096	0.677824	-0.0530172	0.538358	0.681873	4.62704e-20	0.710248	2.51067e-22	-0.0553218	0.520819	0.28462	0.000749329	0.313912	0.00018738	-0.285978	0.000704922	-0.500086	4.91087e-10	0.0470951	0.584731	-0.65849	2.2323e-18	-0.494146	8.43375e-10	-0.453469	2.62604e-08	-0.610165	2.47491e-15	-0.178731	0.0366459	0.369863	8.657e-06
FOXM1	black	-0.1145	0.182762	0.292303	0.000528292	0.1315	0.125591	0.1082	0.208195	0.167687	0.0501556	-0.0996918	0.246431	0.00478148	0.955777	0.0647175	0.452444	0.843451	3.00398e-38	0.38054	4.49471e-06	0.0589684	0.493673	0.074762	0.385249	-0.0358637	0.677365	-0.201609	0.0181542	-0.348966	2.92446e-05	0.145104	0.0906843	-0.414588	4.73601e-07	-0.327296	9.46637e-05	-0.269752	0.00143387	-0.394503	1.84087e-06	-0.0714435	0.406752	0.0928097	0.280728
EREG	black	-0.185225	0.0302406	0.204507	0.0165231	4.01788e-05	0.999628	0.0626236	0.467233	0.182245	0.0330516	-0.0757072	0.379253	-0.0108338	0.900011	-0.0589922	0.493498	0.522616	5.72976e-11	0.205611	0.0159362	-0.158369	0.0645507	-0.111432	0.19485	-0.163964	0.0555511	-0.262877	0.0019126	-0.264794	0.00176631	0.0923403	0.283178	-0.310555	0.00022128	-0.205917	0.0157766	-0.0752117	0.382389	-0.075826	0.378503	0.205383	0.0160557	0.0771929	0.369943
IFITM10	black	0.0413124	0.631709	0.0280017	0.745324	0.0328669	0.702999	0.189181	0.026825	0.0849065	0.323897	-0.100367	0.243228	-0.0237296	0.78313	-0.139981	0.102792	0.484816	1.93185e-09	0.25861	0.00227857	0.0298411	0.729224	0.382633	3.942e-06	0.0104354	0.903669	-0.192252	0.0244063	-0.209355	0.0140785	0.123753	0.149652	-0.210846	0.0133931	-0.214026	0.0120276	-0.109938	0.200941	-0.283712	0.000780442	0.0834313	0.332405	-0.345268	3.59565e-05
LAMA3	black	-0.0440627	0.609167	0.329626	8.37776e-05	0.0169085	0.844525	0.0868969	0.312642	0.134381	0.117445	0.00482138	0.955409	0.0296583	0.730819	0.142953	0.0956221	0.53165	2.3142e-11	0.382878	3.88172e-06	-0.229472	0.00698867	-0.220478	0.00962771	-0.191337	0.0251063	-0.118553	0.167653	-0.232672	0.00621798	0.120036	0.162361	-0.524795	4.6157e-11	-0.286168	0.000698908	-0.171141	0.045546	-0.193372	0.023572	0.0534455	0.535076	0.37471	6.44732e-06
MAPKAPK2	black	0.184248	0.0311384	-0.176705	0.0388653	-0.130542	0.128393	-0.100826	0.241072	-0.164342	0.0549814	-0.0246431	0.775	-0.0560464	0.515365	0.0335378	0.697229	-0.483097	2.24451e-09	-0.275519	0.00111954	-0.131986	0.124187	-0.0304883	0.723587	0.193549	0.0234421	0.00803476	0.925757	0.248313	0.00343612	-0.297121	0.000422171	0.309712	0.000230642	0.209197	0.0141527	0.0808438	0.347669	0.362769	1.3213e-05	0.122998	0.15217	-0.140019	0.102698
HMMR	black	-0.143893	0.0934383	0.297644	0.000411939	0.105716	0.218891	0.0600069	0.486081	0.177268	0.0382375	-0.0423664	0.623029	0.0300847	0.7271	-0.000161264	0.998508	0.862766	8.19213e-42	0.305563	0.000282328	-0.0567642	0.509991	-0.0960445	0.264227	-0.153243	0.0738072	-0.316492	0.000164674	-0.419046	3.46121e-07	0.278152	0.000998145	-0.379561	4.77793e-06	-0.196535	0.0213461	-0.173474	0.0426371	-0.316516	0.000164473	0.0137285	0.873493	0.226645	0.00773892
ITGB6	black	-0.0516212	0.549123	0.253304	0.00282145	-0.0967917	0.260512	0.123741	0.149691	0.134965	0.115845	-0.0791239	0.358055	-0.0566447	0.510884	0.0613931	0.476046	0.478736	3.27191e-09	0.386816	3.02443e-06	-0.211999	0.0128832	-0.0909855	0.290331	-0.0487585	0.571522	-0.10753	0.211043	-0.220544	0.00960537	0.00123136	0.988606	-0.472454	5.57958e-09	-0.276443	0.00107547	-0.269446	0.00145262	-0.208721	0.014379	0.0217958	0.800418	0.247424	0.0035575
ECT2	black	-0.0667935	0.438044	0.268543	0.00150922	0.00593826	0.945094	0.00143593	0.986713	0.136315	0.112212	-0.00488026	0.954865	0.0516015	0.549276	0.0487544	0.571555	0.741316	3.84235e-25	0.426955	1.96244e-07	-0.287146	0.000668688	-0.232929	0.00615953	-0.141508	0.0990564	-0.368549	9.36928e-06	-0.429752	1.60007e-07	0.26197	0.00198561	-0.570422	3.4267e-13	-0.285202	0.000730001	-0.191024	0.0253499	-0.229663	0.0069404	0.136525	0.111655	0.462614	1.26006e-08
MRPL44	black	0.0654869	0.447077	0.0273325	0.751208	0.136686	0.111229	-0.0224909	0.794193	0.0599319	0.486627	-0.0296951	0.730497	-0.0563004	0.51346	0.0942836	0.273126	0.404623	9.39152e-07	0.155614	0.0694	0.22348	0.00866258	-0.0400231	0.642396	-0.175146	0.0406478	-0.0510611	0.553472	-0.154641	0.0711824	0.082509	0.337795	-0.155658	0.06932	-0.078924	0.359274	-0.142196	0.0974091	-0.257764	0.0023582	-0.219272	0.0100413	0.103823	0.227299
CDA	black	-0.112681	0.189859	0.091385	0.288209	-0.0840166	0.329012	0.20022	0.0189837	0.106733	0.214463	-0.164382	0.0549223	-0.0395538	0.646304	-0.0359219	0.67687	0.520707	6.91667e-11	0.199339	0.0195269	-0.082988	0.334989	0.117308	0.172191	-0.0610969	0.478181	-0.273746	0.00120873	-0.292959	0.000512531	0.192828	0.0239743	-0.205296	0.0161017	-0.206695	0.0153777	-0.0203383	0.813513	-0.16077	0.0605527	0.239654	0.00479342	-0.0890732	0.300631
TPI1	black	-0.0886381	0.303008	0.18165	0.0336383	-0.0277398	0.747625	0.0856529	0.319646	0.200491	0.0188196	-0.0832234	0.333615	-0.0120272	0.889063	0.0726103	0.399112	0.687627	1.68569e-20	0.349005	2.91794e-05	-0.0135003	0.875579	0.0669678	0.436847	-0.0241848	0.779076	-0.262825	0.00191676	-0.31877	0.000146782	0.0774802	0.368159	-0.423994	2.43111e-07	-0.375175	6.26613e-06	-0.187753	0.0280179	-0.293509	0.000499649	0.0576996	0.503032	0.0552675	0.521229
SEC61G	black	0.0101553	0.906243	0.12675	0.139962	0.0513296	0.551386	0.0369259	0.668366	0.054883	0.524135	-0.101962	0.235783	0.0445521	0.605192	0.00484255	0.955213	0.4112	5.99214e-07	0.150129	0.0799365	0.360166	1.53919e-05	0.226664	0.00773366	-0.230355	0.00676806	0.0780639	0.364551	-0.123184	0.151548	-0.0357858	0.678027	-0.17087	0.0458942	-0.211332	0.0131758	-0.0858298	0.318644	-0.285086	0.000733821	-0.0541802	0.52947	-0.302332	0.00032981
PSMC6	black	-0.0135297	0.87531	0.07047	0.413191	-0.0067001	0.938063	0.0953428	0.267749	0.0967562	0.260688	0.0239057	0.781562	0.0822082	0.339566	0.0389017	0.65175	0.58122	9.58674e-14	0.412648	5.42062e-07	0.165958	0.052605	0.0386611	0.653765	0.0402335	0.640647	-0.260205	0.00213489	-0.392789	2.05855e-06	0.0789134	0.359339	-0.416084	4.2651e-07	-0.370791	8.18515e-06	-0.294803	0.000470488	-0.416756	4.06852e-07	-0.139259	0.104596	0.251111	0.00307818
MRPS22	black	-0.111506	0.194551	0.362285	1.35946e-05	0.161949	0.0586651	0.0154339	0.857934	0.142953	0.0956221	0.0381512	0.658042	0.0674146	0.433786	-0.00644163	0.940448	0.526934	3.72739e-11	0.239846	0.00475872	0.254181	0.00272432	0.0471589	0.584222	-0.319308	0.00014283	0.03175	0.71264	-0.131937	0.124328	0.0984833	0.252234	-0.306678	0.000267474	-0.22008	0.00976242	-0.119325	0.164883	-0.298604	0.000393711	-0.101524	0.237811	-0.109618	0.202261
AC026401.3	black	-0.0085725	0.920804	-0.0343656	0.690136	0.0265364	0.758228	0.17395	0.0420622	0.0337626	0.6953	-0.0916703	0.286701	0.0448814	0.602525	-0.0481192	0.576583	0.531284	2.4021e-11	0.292587	0.000521408	0.283496	0.000787994	0.521183	6.6001e-11	0.0815866	0.343242	-0.326056	0.000100978	-0.467477	8.45111e-09	0.0665214	0.439916	-0.128743	0.133785	-0.26276	0.00192187	-0.170953	0.0457879	-0.429062	1.68294e-07	-0.00843003	0.922116	-0.314583	0.000181204
CDKN3	black	-0.140982	0.100331	0.23306	0.00612986	0.137747	0.108455	0.0473213	0.582927	0.108948	0.205049	-0.0646638	0.45282	0.0886519	0.302932	-0.00907819	0.916149	0.823735	4.46531e-35	0.234277	0.00586076	0.212396	0.0127116	0.0817771	0.342113	-0.196858	0.0211293	-0.240438	0.00465324	-0.296075	0.00044339	0.269243	0.00146518	-0.214431	0.011863	-0.2029	0.0174109	-0.168142	0.0495276	-0.380323	4.55606e-06	-0.0908592	0.291004	-0.0537451	0.532787
ARF6	black	-0.103329	0.229528	0.0988208	0.250604	-0.0394281	0.647352	0.071511	0.406307	0.120579	0.160457	0.118371	0.168311	0.0515538	0.549646	0.113038	0.188453	0.400868	1.20867e-06	0.10916	0.204164	-0.0395123	0.64665	-0.297371	0.000417248	-0.0172621	0.841316	-0.371018	8.07365e-06	-0.235097	0.00568546	0.164277	0.0550791	-0.152827	0.0746045	-0.0685512	0.426057	-0.120561	0.16052	-0.0644821	0.454094	0.0184142	0.830878	0.376354	5.82805e-06
CENPU	black	-0.0983211	0.253019	0.246416	0.00369961	0.194341	0.02287	-0.0414148	0.630863	0.080422	0.350198	-0.0598912	0.486924	0.106015	0.217581	0.000768413	0.99289	0.754406	1.88133e-26	0.428681	1.73049e-07	-0.00319754	0.970418	0.186837	0.0288067	-0.0214267	0.803729	-0.22074	0.00953975	-0.430891	1.47155e-07	0.212636	0.0126086	-0.379665	4.74691e-06	-0.261405	0.00203231	-0.25237	0.00292836	-0.509882	1.96709e-10	-0.143235	0.0949617	0.138708	0.105989
PTTG1	black	-0.0874329	0.309655	0.184752	0.0306729	0.0891415	0.300259	0.0327719	0.703817	0.116166	0.176436	-0.105216	0.22109	0.0416064	0.629282	-0.129004	0.132993	0.827971	1.00596e-35	0.362915	1.30997e-05	0.206168	0.0156467	0.342187	4.26275e-05	-0.0794591	0.356016	-0.281803	0.000849692	-0.47489	4.54196e-09	0.300117	0.00036651	-0.246939	0.00362525	-0.265071	0.00174604	-0.201745	0.0180746	-0.535521	1.55642e-11	-0.0837878	0.330336	-0.0951255	0.268846
POMP	black	0.00670974	0.937974	0.0711109	0.408945	0.125608	0.143597	-0.0494861	0.565789	0.0444111	0.606337	-0.17157	0.0449983	-0.121724	0.156493	-0.0535477	0.534295	0.381562	4.21625e-06	0.219972	0.00979939	0.191406	0.0250535	0.277498	0.00102713	-0.0207288	0.809999	-0.18947	0.0265894	-0.10261	0.232805	0.237963	0.00510865	-0.123489	0.150528	-0.224614	0.00832093	-0.0971972	0.258511	-0.332984	7.01313e-05	-0.147794	0.084795	-0.138284	0.107073
LSM12	black	-0.11155	0.194371	0.313415	0.000192072	0.00143368	0.986734	0.000695532	0.993564	0.0867992	0.313188	0.0675595	0.432797	0.0957534	0.265685	0.0144704	0.866718	0.573722	2.33323e-13	0.381248	4.30002e-06	-0.042429	0.622514	-0.150234	0.0797231	-0.189747	0.0263645	-0.150942	0.0782976	-0.215152	0.0115746	0.119117	0.165625	-0.474106	4.85368e-09	-0.260019	0.00215124	-0.273877	0.0012019	-0.282241	0.000833313	-0.0649089	0.451105	0.323145	0.000117389
TCF19	black	-0.0406222	0.63742	0.186914	0.0287396	0.206614	0.0154185	-0.0272503	0.751932	0.0402055	0.640879	-0.128717	0.133866	-0.0455312	0.597277	-0.102933	0.231331	0.671867	2.53765e-19	0.230687	0.00668671	-0.00214125	0.980188	0.150997	0.0781888	-0.0833378	0.332948	-0.209398	0.014058	-0.346104	3.43236e-05	0.0874112	0.309776	-0.186297	0.0292808	-0.131431	0.125791	-0.166514	0.051806	-0.32472	0.000108222	-0.00718931	0.93355	0.0140587	0.870477
RPE	black	-0.0294984	0.732215	0.160431	0.0611043	0.0237472	0.782974	0.119107	0.165661	0.136874	0.110733	0.0148223	0.863508	-0.000528383	0.995111	0.126385	0.141115	0.538751	1.11339e-11	0.261682	0.00200931	-0.155321	0.069933	-0.43281	1.27723e-07	-0.212329	0.0127403	-0.226886	0.00767233	-0.19706	0.0209948	0.170397	0.0465084	-0.491481	1.0714e-09	-0.178406	0.036995	-0.117831	0.170276	-0.100876	0.240834	0.0541978	0.529337	0.485958	1.74776e-09
RAD51	black	-0.0857204	0.319263	0.216094	0.0112069	0.16037	0.0612043	-0.00459472	0.957503	0.127953	0.136207	-0.170661	0.046165	-0.00898953	0.916965	-0.0871594	0.311177	0.848276	4.30736e-39	0.411539	5.85335e-07	0.0766346	0.373425	0.261048	0.00206238	-0.168949	0.0484284	-0.288554	0.000627293	-0.399388	1.33398e-06	0.232171	0.00633347	-0.346942	3.27562e-05	-0.243728	0.00410427	-0.212758	0.0125569	-0.490303	1.19011e-09	-0.0410188	0.634136	-0.0334682	0.697827
SMS	black	-0.087815	0.307538	0.210365	0.0136106	-0.0726504	0.398851	0.00336735	0.968848	0.00842328	0.922178	-0.0991474	0.249034	-0.0530174	0.538357	0.0301507	0.726525	0.57608	1.76821e-13	0.323241	0.000116808	-0.18396	0.0314078	-0.00759793	0.929783	-0.172414	0.0439383	-0.170441	0.0464511	-0.347448	3.18432e-05	0.202065	0.0178887	-0.428826	1.71232e-07	-0.387303	2.93185e-06	-0.11936	0.164759	-0.205114	0.0161981	0.149821	0.0805651	0.0807464	0.348252
NUSAP1	black	-0.103032	0.23088	0.292405	0.000525817	0.0882225	0.305289	-0.0200484	0.816123	0.0748983	0.384381	-0.119678	0.163627	0.0383069	0.656735	-0.0167153	0.846279	0.830254	4.42913e-36	0.363575	1.25998e-05	-0.053869	0.531842	0.0417282	0.628278	-0.073213	0.395199	-0.319875	0.000138773	-0.454625	2.39623e-08	0.339892	4.83356e-05	-0.347882	3.10794e-05	-0.186813	0.0288279	-0.170877	0.0458847	-0.399291	1.34258e-06	-0.0133261	0.877171	0.201695	0.0181036
MBOAT2	black	-0.0693827	0.420454	0.162556	0.0577117	-0.044137	0.608562	0.166836	0.0513487	0.131984	0.124192	-0.0550044	0.523217	-0.0471804	0.584051	-0.0673567	0.434182	0.677472	9.86229e-20	0.547922	4.21796e-12	-0.186649	0.0289707	0.000930754	0.991387	-0.0452621	0.599448	-0.411099	6.03395e-07	-0.423823	2.46115e-07	-0.00103558	0.990418	-0.587056	4.72179e-14	-0.371417	7.88082e-06	-0.380096	4.62106e-06	-0.309189	0.000236639	0.174036	0.0419593	0.290295	0.000579371
MET	black	-0.0731588	0.39555	0.35241	2.40688e-05	-0.143667	0.0939593	0.0893942	0.298886	0.168398	0.049177	-0.0410631	0.633769	0.0496091	0.564822	0.00918897	0.915129	0.621432	5.3775e-16	0.431002	1.45958e-07	-0.238487	0.00500898	-0.228848	0.00714841	-0.161116	0.0599929	-0.211551	0.0130791	-0.373051	7.1356e-06	0.193949	0.0231518	-0.572916	2.56374e-13	-0.325391	0.000104529	-0.221162	0.00939985	-0.211044	0.0133043	0.0760351	0.377186	0.388123	2.78203e-06
EPHX4	black	0.0108331	0.900017	0.0971223	0.25888	0.081887	0.341463	0.0978927	0.255103	0.0487693	0.571436	-0.124944	0.145742	-0.0313048	0.716497	-0.131505	0.125575	0.542184	7.76905e-12	0.554722	2.0147e-12	-0.0828325	0.335899	0.271455	0.00133356	-0.0723115	0.40106	-0.268865	0.00148882	-0.422539	2.69882e-07	0.139322	0.104437	-0.487556	1.51839e-09	-0.350396	2.69795e-05	-0.312893	0.000197114	-0.465472	9.97197e-09	-0.0294157	0.732937	0.116307	0.175906
DDX11	black	-0.0822619	0.33925	0.117248	0.172412	0.09653	0.26181	0.108234	0.208053	0.187335	0.0283759	-0.00382952	0.964575	0.072522	0.399687	-0.0221093	0.797609	0.46705	8.75543e-09	0.375362	6.19455e-06	0.143621	0.0940659	0.285487	0.000720697	0.240158	0.00470288	-0.161809	0.0588867	-0.336492	5.81156e-05	0.197719	0.0205613	-0.278293	0.000991998	-0.256883	0.00244381	-0.265587	0.00170884	-0.422452	2.71571e-07	-0.115508	0.178916	0.0525284	0.542116
CCNB2	black	-0.152189	0.0758379	0.218452	0.0103312	0.138863	0.105597	0.0795778	0.355295	0.183572	0.0317732	-0.107241	0.212277	0.0311143	0.718149	0.0132735	0.877652	0.892948	1.22698e-48	0.426252	2.06513e-07	0.0947357	0.270822	0.259871	0.00216433	-0.0739272	0.390593	-0.305659	0.00028102	-0.445048	5.06802e-08	0.310907	0.000217474	-0.352669	2.37154e-05	-0.243968	0.00406652	-0.24773	0.00351526	-0.520366	7.15201e-11	-0.0524791	0.542496	-0.00128008	0.988155
ATAD2	black	-0.0800875	0.352213	0.230118	0.00682651	0.0329782	0.70204	-0.0309686	0.719413	0.136512	0.111688	-0.0588889	0.494257	0.0048568	0.955081	-0.0155501	0.856876	0.690526	1.00465e-20	0.105732	0.218821	-0.0449289	0.602141	-0.311023	0.000216235	-0.179066	0.0362898	-0.234769	0.00575501	-0.243381	0.00415919	0.173754	0.042298	-0.249992	0.00321701	-0.0692726	0.421194	-0.103999	0.226508	-0.0767785	0.372526	0.0960125	0.264387	0.208303	0.0145803
CDK1	black	-0.0764985	0.374277	0.276876	0.00105536	0.0969501	0.259729	0.0967576	0.260681	0.0829143	0.33542	-0.136052	0.112912	0.0223699	0.795276	-0.078675	0.360797	0.875866	1.48358e-44	0.448892	3.76224e-08	0.0537538	0.532721	0.141194	0.0998156	-0.0585093	0.497048	-0.290339	0.000578204	-0.425119	2.24172e-07	0.311821	0.000207872	-0.432942	1.2648e-07	-0.338193	5.30127e-05	-0.260604	0.0021003	-0.49352	8.9235e-10	-0.0797362	0.354336	0.147865	0.084644
MEMO1	black	-0.114632	0.182254	-0.0191797	0.823959	0.0152155	0.859924	0.081873	0.341546	0.0895351	0.298121	0.00830639	0.923255	0.0346526	0.687682	-0.020087	0.815776	0.4131	5.25291e-07	0.198162	0.0202739	-0.129449	0.131651	-0.151301	0.0775829	-0.088596	0.303238	-0.18888	0.0270726	-0.298941	0.000387492	-0.00119728	0.988921	-0.297628	0.000412241	-0.266037	0.00167694	-0.208837	0.0143234	-0.0721855	0.401883	0.146494	0.0876015	0.244415	0.00399719
PMAIP1	black	-0.091551	0.287331	0.0452256	0.599743	-0.0180196	0.83445	-0.0208588	0.80883	-0.0111252	0.897335	-0.0622297	0.470044	0.0470989	0.584701	-0.122346	0.154372	0.574476	2.13576e-13	0.132625	0.12236	-0.0325891	0.705393	-0.0371717	0.666289	-0.0874068	0.3098	-0.323641	0.000114427	-0.432673	1.29027e-07	0.196158	0.0216018	-0.176012	0.0396494	-0.176443	0.0391604	-0.0636959	0.459627	-0.110489	0.198676	0.246577	0.00367665	0.0242525	0.778474
GINS2	black	-0.135896	0.113331	0.178033	0.0373986	0.201483	0.0182282	-0.0264655	0.758854	0.147176	0.086121	-0.115067	0.180592	-0.0482392	0.575631	-0.10835	0.207562	0.810071	4.21911e-33	0.326737	9.74608e-05	0.217638	0.0106263	0.200441	0.0188495	-0.248409	0.00342322	-0.184757	0.0306684	-0.310891	0.000217638	0.103751	0.227624	-0.301465	0.000343755	-0.207404	0.0150213	-0.206736	0.0153566	-0.430934	1.46696e-07	-0.055793	0.517269	-0.119508	0.164232
CDCA8	black	-0.0264549	0.758947	0.183489	0.0318519	0.0599892	0.48621	0.0663412	0.441159	0.103561	0.228478	-0.123462	0.15062	0.0267778	0.756097	-0.0572594	0.506301	0.815165	8.09013e-34	0.468232	7.93894e-09	-0.0293142	0.733824	0.225239	0.00813803	0.0466456	0.588325	-0.367845	9.77347e-06	-0.486988	1.59636e-09	0.293787	0.000493245	-0.378747	5.02605e-06	-0.261432	0.0020301	-0.252465	0.00291732	-0.535961	1.48731e-11	-0.116605	0.174795	0.192613	0.0241349
THOC3	black	-0.116485	0.175244	0.146958	0.0865918	0.141331	0.0994852	0.0200816	0.815825	0.18013	0.0351771	-0.066648	0.439044	-0.0682267	0.428256	-0.143719	0.0938399	0.615708	1.17674e-15	0.489553	1.27225e-09	0.307988	0.000250948	0.371356	7.90996e-06	0.00458929	0.957553	-0.215765	0.011334	-0.427785	1.84736e-07	0.12569	0.143331	-0.370973	8.09533e-06	-0.3078	0.000253261	-0.390005	2.46521e-06	-0.578551	1.31914e-13	-0.228396	0.00726622	0.0186572	0.82868
ENO2	black	-0.0413655	0.63127	0.0717809	0.404534	-0.151969	0.0762667	0.00627942	0.941945	0.0897912	0.296736	-0.0147614	0.864063	-0.020732	0.809971	0.00108529	0.989958	0.419745	3.29401e-07	0.331086	7.75661e-05	-0.149436	0.081356	0.130951	0.12719	0.239902	0.00474858	-0.437153	9.23849e-08	-0.290197	0.000581985	0.00330445	0.96943	-0.365927	1.09597e-05	-0.349082	2.90545e-05	-0.194044	0.0230829	-0.185459	0.0300289	0.206986	0.0152304	0.0716714	0.405253
DARS2	black	-0.025375	0.768504	0.125172	0.145003	0.18717	0.0285179	0.0365054	0.671922	0.125476	0.144021	0.0796643	0.354771	0.0289925	0.736637	0.0324221	0.706833	0.388776	2.66797e-06	0.360458	1.51314e-05	-0.0245832	0.775532	-0.238637	0.00498073	-0.0947945	0.270523	-0.052433	0.54285	-0.194721	0.0225994	0.0259988	0.762979	-0.488935	1.34403e-09	-0.174136	0.0418401	-0.27832	0.000990834	-0.257207	0.00241204	-0.173713	0.0423477	0.506339	2.74798e-10
CKAP2	black	-0.0383324	0.656521	0.254644	0.00267431	0.132871	0.121663	0.00095931	0.991123	0.0592461	0.491636	-0.0148957	0.862839	0.0522354	0.544374	0.0205127	0.811943	0.637817	5.21592e-17	0.0912272	0.289046	-0.129825	0.130523	-0.290231	0.000581063	-0.202345	0.0177273	-0.327523	9.35465e-05	-0.224424	0.00837736	0.275131	0.00113854	-0.197413	0.0207615	-0.0387038	0.653407	-0.049299	0.56726	-0.0463771	0.590477	0.154206	0.071992	0.219311	0.0100275
LMNB1	black	-0.115281	0.179776	0.148062	0.0842263	0.126684	0.140169	-0.0478725	0.57854	0.015148	0.860539	-0.0790284	0.358637	-0.00313641	0.970984	-0.0188325	0.827095	0.672098	2.44166e-19	0.0644587	0.454258	0.00358545	0.966832	-0.122993	0.152188	-0.107196	0.212472	-0.24599	0.00376127	-0.321292	0.000129096	0.320112	0.000137111	-0.0713254	0.40753	0.0220467	0.79817	-0.0530241	0.538306	-0.176512	0.039082	0.00444013	0.958932	0.138284	0.107071
PCDH1	black	0.026041	0.762606	0.257053	0.00242711	-0.0574286	0.505043	0.105837	0.218362	0.113235	0.18768	-0.0818983	0.341396	-0.0905278	0.292775	-0.150766	0.0786513	0.498542	5.65758e-10	0.666272	6.38655e-19	-0.253415	0.002809	0.00664346	0.938585	-0.160398	0.0611583	-0.259471	0.00219997	-0.397825	1.47957e-06	0.0682715	0.427952	-0.666959	5.70843e-19	-0.343377	3.99257e-05	-0.392291	2.12622e-06	-0.435383	1.05481e-07	-0.0681403	0.428843	0.527172	3.63957e-11
ULBP2	black	0.0024813	0.977043	-0.00447433	0.958615	0.0684524	0.426726	0.0563225	0.513295	0.159979	0.0618467	-0.16923	0.0480509	-0.0585625	0.496657	-0.116506	0.175164	0.591339	2.78254e-14	0.173409	0.0427151	0.00154933	0.985664	0.104107	0.226024	-0.266762	0.00162678	-0.242866	0.00424216	-0.230397	0.00675767	0.134321	0.117612	-0.200842	0.0186081	-0.0627795	0.466123	-0.032878	0.702903	-0.164582	0.0546232	0.20758	0.0149341	-0.183392	0.0319441
AC026271.1	black	0.0341397	0.692069	0.154904	0.0706979	0.136652	0.111319	0.00129743	0.987995	0.0443675	0.606691	-0.0685492	0.426071	-0.0044668	0.958685	-0.169402	0.0478206	0.447349	4.24227e-08	0.146908	0.0867009	0.181236	0.0340511	0.0769892	0.371211	-0.296225	0.000440296	-0.202829	0.0174508	-0.287572	0.00065593	0.121511	0.157226	-0.187827	0.0279548	-0.257743	0.0023602	0.0199345	0.817149	-0.178465	0.0369313	0.188877	0.0270756	-0.131393	0.1259
HDGF	black	0.050627	0.556854	0.199553	0.0193941	0.0699423	0.416707	0.185567	0.0299314	0.123755	0.149645	-0.0436837	0.612252	0.00542636	0.94982	-0.0509442	0.554382	0.594972	1.76589e-14	0.517231	9.71369e-11	-0.0327775	0.703769	0.0566148	0.511107	0.104589	0.223871	-0.267569	0.00157251	-0.272293	0.0012866	0.0476439	0.580358	-0.541571	8.28666e-12	-0.357887	1.75737e-05	-0.397906	1.47163e-06	-0.420022	3.22974e-07	-0.173593	0.0424928	0.279682	0.000933253
ITGA6	black	0.0204087	0.812879	0.188997	0.0269768	0.00776691	0.928225	0.0765471	0.373973	0.0820995	0.340207	0.00799551	0.926119	0.0391382	0.649773	0.00434903	0.959773	0.482432	2.3782e-09	0.363203	1.28792e-05	-0.403786	9.93775e-07	-0.37833	5.15769e-06	-0.23433	0.00584917	-0.210794	0.0134163	-0.279838	0.000926884	0.175801	0.0398906	-0.52787	3.39304e-11	-0.187112	0.0285677	-0.189786	0.0263333	-0.112885	0.189056	0.0754439	0.380917	0.580909	9.95073e-14
TBC1D2	black	-0.00631536	0.941613	0.0418919	0.626929	0.0026613	0.975378	0.0818063	0.34194	0.216986	0.0108681	-0.0747185	0.385527	-0.019015	0.825446	-0.0166407	0.846956	0.566537	5.35835e-13	0.224938	0.00822554	-0.22294	0.00882954	0.104671	0.223505	-0.126029	0.142246	-0.375306	6.21601e-06	-0.36338	1.27456e-05	0.142179	0.0974501	-0.306408	0.000271002	-0.112767	0.189521	0.064587	0.453359	-0.103262	0.229832	0.434651	1.11398e-07	-0.085756	0.319062
MOB3C	black	0.0525879	0.541658	-0.101586	0.237526	-0.148054	0.0842443	-0.0352105	0.682922	0.124861	0.146011	0.121934	0.155775	0.0566116	0.511131	0.0663888	0.44083	-0.406231	8.42219e-07	-0.291642	0.00054462	0.0870106	0.312007	0.234966	0.00571315	0.109375	0.203269	0.20571	0.0158841	0.232675	0.00621729	-0.0213908	0.804051	0.422908	2.62837e-07	0.205881	0.0157955	0.226021	0.00791366	0.126203	0.141693	-0.0414656	0.630444	-0.422409	2.72412e-07
KIFC1	black	-0.131852	0.124573	0.215088	0.0115998	0.220148	0.00973922	0.0252183	0.769893	0.124798	0.146216	-0.139812	0.103212	-0.0499893	0.561839	-0.0673555	0.434191	0.829391	6.0469e-36	0.433856	1.18186e-07	0.118566	0.167608	0.338814	5.12549e-05	0.0486366	0.572485	-0.313049	0.000195592	-0.446786	4.43143e-08	0.180359	0.0349422	-0.321027	0.000130855	-0.251119	0.00307717	-0.307918	0.00025181	-0.52549	4.30679e-11	-0.0957076	0.265914	-0.0161955	0.851003
SKA3	black	-0.086676	0.313878	0.257219	0.00241089	0.171221	0.0454431	0.0581025	0.50005	0.075239	0.382216	-0.13733	0.109538	-0.0360986	0.675371	-0.0992598	0.248495	0.864759	3.2727e-42	0.494766	7.97472e-10	0.0474831	0.581638	0.239242	0.00486854	-0.0508283	0.555285	-0.261951	0.00198716	-0.398496	1.4153e-06	0.191497	0.024983	-0.464185	1.10828e-08	-0.35499	2.07689e-05	-0.320441	0.000134828	-0.512354	1.55452e-10	-0.0775967	0.367437	0.0515853	0.549402
NUF2	black	-0.0794534	0.35605	0.246848	0.00363803	0.199731	0.0192839	0.0215899	0.802265	0.071714	0.404973	-0.0994862	0.247412	-0.00328048	0.969652	-0.140019	0.102697	0.832468	1.9762e-36	0.45343	2.63432e-08	0.118312	0.168524	0.184006	0.0313648	0.00102289	0.990535	-0.323513	0.000115187	-0.395354	1.74103e-06	0.114204	0.183906	-0.433358	1.22634e-07	-0.322547	0.000121053	-0.336255	5.88622e-05	-0.492911	9.42544e-10	-0.106477	0.215574	0.0993314	0.248152
CEP55	black	-0.118358	0.168359	0.276955	0.00105177	0.06872	0.424916	0.0456934	0.59597	0.140258	0.102107	-0.113531	0.186519	0.00547678	0.949355	-0.0654174	0.44756	0.905531	4.08662e-52	0.434401	1.13493e-07	-0.0402934	0.640149	0.0657248	0.445424	-0.136661	0.111295	-0.291688	0.000543483	-0.432085	1.34759e-07	0.288274	0.000635343	-0.470075	6.81016e-09	-0.366957	1.03067e-05	-0.235242	0.0056549	-0.421626	2.88106e-07	0.0173121	0.840862	0.165174	0.0537468
ARL15	black	0.0633106	0.462352	-0.111723	0.193678	-0.0619689	0.471911	-0.219587	0.0099318	-0.171261	0.0453921	0.0258529	0.76427	-0.0339598	0.693609	-0.0127784	0.882182	-0.516737	1.01907e-10	-0.38861	2.69663e-06	-0.0934827	0.277239	-0.433702	1.19546e-07	-0.0913164	0.288573	-0.00166253	0.984617	0.442813	6.01629e-08	-0.0950863	0.269045	0.294422	0.000478908	0.276301	0.00108211	0.217346	0.0107341	0.49544	7.50302e-10	0.0727968	0.397899	0.144259	0.0925986
BUB1	black	-0.0765734	0.373808	0.262478	0.00194445	0.145717	0.0893138	0.0931817	0.278795	0.152674	0.074899	-0.0675179	0.433081	0.0393448	0.648048	-0.0219426	0.799102	0.915193	3.91205e-55	0.317115	0.000159592	-0.0212453	0.805358	-0.0516387	0.548988	-0.17966	0.0356657	-0.386335	3.11859e-06	-0.449593	3.56191e-08	0.312863	0.000197414	-0.356262	1.93038e-05	-0.189361	0.026678	-0.182445	0.0328556	-0.335913	5.99574e-05	0.0563236	0.513286	0.180831	0.0344604
GPR87	black	-0.185831	0.0296945	0.106137	0.217052	-0.0637525	0.459227	0.0969008	0.259973	0.209324	0.0140929	-0.137094	0.110155	-0.0264685	0.758827	-0.0812971	0.344964	0.54922	3.66775e-12	0.214643	0.0117775	0.0106778	0.901443	0.138797	0.105764	-0.0736837	0.39216	-0.151336	0.0775138	-0.268004	0.00154394	0.0826419	0.337015	-0.19277	0.024017	-0.132947	0.121447	-0.133872	0.118854	-0.190484	0.0257752	0.179147	0.0362039	-0.176	0.0396629
UBE2T	black	-0.030091	0.727046	0.187657	0.0281002	0.207424	0.0150115	0.05322	0.536803	0.0623953	0.468861	-0.145703	0.0893449	-0.00977595	0.90973	-0.100117	0.24441	0.806303	1.38637e-32	0.517305	9.64384e-11	0.143337	0.0947259	0.319181	0.000143753	-0.0264346	0.759127	-0.263206	0.00188675	-0.415633	4.40222e-07	0.20197	0.0179433	-0.438648	8.25548e-08	-0.368534	9.37804e-06	-0.314243	0.000184308	-0.592824	2.31214e-14	-0.177082	0.038444	0.057501	0.504505
ATP5MC3	black	0.098173	0.253739	0.0287615	0.738659	0.223751	0.00857988	-0.00502934	0.953487	0.0212426	0.805382	-0.170645	0.0461849	-0.0889975	0.301043	-0.0241832	0.779091	0.385846	3.21717e-06	0.229972	0.00686292	0.240057	0.0047209	0.17785	0.0375981	-0.286121	0.000700393	-0.0376112	0.662584	-0.134434	0.117299	0.104229	0.225477	-0.198229	0.0202303	-0.145766	0.0892064	-0.0879531	0.306774	-0.348365	3.02489e-05	-0.177933	0.0375075	-0.0442102	0.607967
TNS2	black	0.0258613	0.764196	-0.256229	0.00250921	-0.0591959	0.492004	-0.069049	0.422697	-0.10734	0.211856	0.0297588	0.729942	-0.027069	0.753529	-0.0100515	0.907197	-0.730183	4.34725e-24	-0.562453	8.51974e-13	-0.132551	0.122569	-0.0594358	0.490248	0.147021	0.086455	0.229555	0.0069677	0.555143	1.92353e-12	-0.210489	0.0135545	0.518552	8.54124e-11	0.316186	0.000167229	0.381366	4.26841e-06	0.605552	4.54401e-15	0.191961	0.0246271	-0.360509	1.50868e-05
SNAPC1	black	-0.0432399	0.615873	0.0270594	0.753614	-0.0822544	0.339294	0.119779	0.163272	0.0305977	0.722636	0.0568627	0.509256	0.118741	0.166977	0.0232305	0.787583	0.463894	1.13495e-08	0.119558	0.164055	0.0390474	0.650532	-0.0428574	0.619002	-0.0615973	0.474578	-0.326996	9.61543e-05	-0.270708	0.00137675	0.12932	0.132038	-0.232606	0.00623316	-0.23151	0.00648859	-0.0892674	0.299574	-0.0526113	0.541478	0.226002	0.00791908	-0.0367827	0.669576
SCEL	black	-0.00117618	0.989117	0.153919	0.0725295	-0.0326906	0.704518	0.164769	0.0543453	0.134654	0.116696	-0.146523	0.0875383	-0.0632033	0.463113	-0.0805205	0.349607	0.493585	8.87075e-10	0.295937	0.000446251	-0.170631	0.0462038	0.017367	0.840364	-0.0938528	0.275333	-0.220123	0.00974788	-0.254747	0.00266325	0.0263421	0.759944	-0.31698	0.000160681	-0.109333	0.203444	-0.134197	0.117952	-0.110637	0.198071	0.255929	0.00253971	-0.00422207	0.960947
SPC25	black	-0.117343	0.172065	0.207746	0.0148523	0.0636099	0.460234	-0.0134479	0.876058	0.00903984	0.916502	-0.134665	0.116664	-0.0630967	0.463869	-0.128598	0.134229	0.634562	8.38372e-17	0.214642	0.0117778	0.0156664	0.855817	0.0513086	0.551548	-0.263207	0.0018867	-0.211793	0.0129729	0.0163843	0.849286	0.183061	0.03226	-0.233944	0.00593323	-0.175642	0.0400734	-0.168593	0.0489111	-0.261174	0.00205173	-0.0507343	0.556017	-0.0461561	0.592249
OSER1	black	0.0554163	0.520106	0.10575	0.218739	-0.005785	0.946509	0.178137	0.0372851	-0.00321744	0.970235	-0.00257393	0.976186	0.0747549	0.385295	-0.00483882	0.955248	0.45662	2.04399e-08	0.124783	0.146265	0.198351	0.0201519	0.0380307	0.659055	-0.00308589	0.971451	-0.301219	0.000347803	-0.359868	1.56625e-05	0.113515	0.186581	-0.0777879	0.366254	-0.0995937	0.246899	-0.0868517	0.312895	-0.192521	0.0242034	0.0323894	0.707115	-0.0564403	0.512412
POC1A	black	-0.0265775	0.757865	0.198231	0.0202292	0.128416	0.134785	0.0783466	0.362811	0.123327	0.151067	-0.0837325	0.330656	0.0752082	0.382411	-0.110921	0.196916	0.830506	4.04207e-36	0.549532	3.54652e-12	0.139568	0.103821	0.383027	3.84554e-06	-0.07998	0.352861	-0.270277	0.00140224	-0.429877	1.58545e-07	0.148011	0.084335	-0.435159	1.07263e-07	-0.342741	4.13498e-05	-0.326215	0.00010015	-0.619975	6.57356e-16	-0.148614	0.0830635	-0.0186345	0.828885
SLC7A6OS	black	-0.00395726	0.963395	0.0902744	0.294134	0.11312	0.18813	0.139687	0.103524	0.159626	0.0624307	0.114826	0.181511	-0.00544741	0.949626	0.0628462	0.465648	0.515333	1.16742e-10	0.291312	0.00055296	-0.0413466	0.631426	-0.129729	0.130808	-0.14723	0.0860042	-0.351991	2.46489e-05	-0.511574	1.67475e-10	0.0569366	0.508705	-0.366209	1.07771e-05	-0.165951	0.0526142	-0.142612	0.0964235	-0.214626	0.0117844	0.120139	0.161999	0.340485	4.67961e-05
IAH1	black	-0.130781	0.127688	0.0594115	0.490426	0.111901	0.192964	0.0987828	0.250787	0.0986451	0.251451	-0.0723245	0.400975	-0.0271167	0.753109	0.0180975	0.833744	0.458558	1.74983e-08	0.300292	0.000363476	0.174225	0.0417331	0.297909	0.000406831	-0.12116	0.158437	-0.191774	0.0247703	-0.347885	3.10743e-05	0.0473102	0.583015	-0.253431	0.00280718	-0.240993	0.00455623	-0.158705	0.0639778	-0.308882	0.000240224	0.128488	0.134565	-0.210753	0.013435
LPCAT2	black	-0.0619357	0.472149	0.192316	0.0243576	-0.0700236	0.416164	0.0550091	0.523181	0.143428	0.0945124	-0.0492043	0.568006	-0.0572817	0.506135	0.000844352	0.992187	0.424041	2.42292e-07	0.187043	0.0286277	-0.191912	0.0246647	-0.284063	0.000768259	-0.178396	0.0370061	-0.156944	0.0670225	-0.220985	0.00945818	0.0275884	0.748956	-0.367592	9.9227e-06	-0.180595	0.0347005	-0.0306139	0.722495	0.0211787	0.805955	0.249754	0.00324728	0.199489	0.0194334
WNT10A	black	-0.0838962	0.329708	0.0655339	0.44675	-0.113122	0.188121	0.0600128	0.486038	0.202478	0.0176508	-0.0698325	0.417441	-0.0257669	0.765031	0.00285412	0.973594	0.452828	2.76268e-08	0.199204	0.0196113	-0.0368556	0.668959	0.174268	0.041683	0.0228771	0.790739	-0.294979	0.000466664	-0.265775	0.00169544	0.182309	0.0329887	-0.124558	0.147001	-0.044877	0.602561	-0.0910257	0.290117	-0.16844	0.0491184	0.200519	0.0188025	-0.141192	0.0998201
KIF20A	black	-0.139128	0.104926	0.271387	0.00133743	0.0331854	0.700258	0.0401978	0.640943	0.16174	0.0589952	-0.0473507	0.582692	0.0124237	0.88543	0.0073632	0.931947	0.874899	2.42242e-44	0.33452	6.461e-05	-0.0473756	0.582494	0.0131298	0.878967	-0.131554	0.125435	-0.270951	0.00136256	-0.418932	3.48924e-07	0.267083	0.00160496	-0.407718	7.61052e-07	-0.250072	0.00320691	-0.174475	0.0414367	-0.316815	0.000162021	0.0787524	0.360323	0.0967988	0.260477
PSMB3	black	-0.0328604	0.703055	0.0605482	0.482149	0.068797	0.424396	-0.0641718	0.456273	0.00756784	0.93006	-0.121156	0.158452	-0.0362263	0.674288	0.00472685	0.956282	0.419094	3.44949e-07	0.273718	0.00121015	0.1639	0.0556474	0.442482	6.17064e-08	0.0159573	0.853169	-0.173031	0.0431768	-0.227442	0.0075205	0.296877	0.000427046	-0.0899314	0.295979	-0.229297	0.0070331	-0.157231	0.0665196	-0.431315	1.42638e-07	-0.16723	0.050793	-0.201224	0.0183806
CALCOCO1	black	0.0456484	0.596332	-0.151026	0.078131	-0.0846419	0.325413	0.0623891	0.468906	-0.0503339	0.559142	0.156454	0.0678905	0.10284	0.231755	0.0885218	0.303645	-0.531414	2.37056e-11	-0.236197	0.00545749	-0.210288	0.0136458	-0.154961	0.0705917	0.302397	0.00032878	0.123725	0.149743	0.112165	0.191911	0.0508758	0.554914	0.184813	0.0306166	0.0745534	0.38658	0.225265	0.00813044	0.376835	5.65764e-06	0.147512	0.0853987	0.0670996	0.435943
RGS5	black	0.080493	0.349772	-0.0715927	0.40577	-0.0551161	0.522373	-0.232883	0.00617002	-0.240993	0.00455617	0.102181	0.234772	-0.0637012	0.45959	-0.0252026	0.770033	-0.546179	5.08415e-12	-0.291167	0.000556655	-0.0892183	0.299841	-0.289215	0.000608699	0.0449332	0.602106	0.163613	0.0560826	0.374326	6.60105e-06	-0.240524	0.00463815	0.209198	0.0141522	0.136516	0.111679	0.126342	0.141251	0.416658	4.09649e-07	-0.0209033	0.80843	0.1216	0.156919
NT5E	black	-0.202411	0.0176895	0.134084	0.118265	-0.0457522	0.595497	0.0588351	0.494652	0.049754	0.563684	-0.0644802	0.454107	0.0532441	0.536619	0.000143464	0.998672	0.492426	9.8443e-10	0.076263	0.375754	-0.0680662	0.429346	-0.199565	0.0193863	-0.153772	0.0728044	-0.245008	0.00390683	-0.224395	0.00838606	0.100722	0.241558	-0.222999	0.0088114	-0.12771	0.13696	-0.0572617	0.506284	0.0299614	0.728175	0.263702	0.00184832	0.0117399	0.891696
SEMA7A	black	0.00328347	0.969624	0.0610463	0.478546	-0.113958	0.184856	0.0454491	0.597939	-0.0260534	0.762496	-0.097066	0.259157	-0.0481671	0.576203	-0.0427117	0.620196	0.442785	6.0291e-08	0.268421	0.00151701	-0.144939	0.0910543	0.149884	0.0804354	0.026329	0.76006	-0.351238	2.57246e-05	-0.312492	0.000201075	0.129726	0.130818	-0.161507	0.0593661	-0.153602	0.0731255	-0.143689	0.0939095	-0.213821	0.012112	0.157538	0.0659826	0.0613452	0.476391
UBE2V1	black	-0.0237638	0.782826	0.127168	0.138648	-0.0247909	0.773687	0.175943	0.0397279	0.145736	0.0892725	-0.0470852	0.58481	-0.0037869	0.964969	0.0268142	0.755776	0.534095	1.8024e-11	0.357843	1.76185e-05	-0.0204011	0.812947	-0.16563	0.05308	0.100017	0.244887	-0.323183	0.000117162	-0.432072	1.34889e-07	-0.0121159	0.88825	-0.433595	1.205e-07	-0.266917	0.00161623	-0.297772	0.00040946	-0.236471	0.00540188	0.00745034	0.931144	0.396925	1.5702e-06
RAB11FIP3	black	0.0722513	0.401454	-0.220512	0.00961619	-0.105272	0.220843	-0.087311	0.310333	0.0144227	0.867154	-0.0351769	0.683208	-0.107148	0.212677	0.0780963	0.364352	-0.524269	4.86356e-11	-0.414341	4.81832e-07	-0.108595	0.206528	0.0628803	0.465406	-0.0402112	0.640832	0.300684	0.000356776	0.380329	4.55442e-06	-0.135735	0.113761	0.374249	6.6321e-06	0.261969	0.0019857	0.251883	0.00298546	0.404892	9.22259e-07	0.223841	0.00855248	-0.389751	2.50592e-06
KIF18B	black	-0.0956058	0.266426	0.253356	0.00281559	0.116841	0.173917	0.0527081	0.540733	0.0981448	0.253875	-0.0941329	0.273897	0.0305231	0.723284	-0.0186845	0.828433	0.862351	9.89875e-42	0.468713	7.62805e-09	0.0218442	0.799984	0.275588	0.00111617	0.0855204	0.320398	-0.306704	0.000267144	-0.47454	4.67883e-09	0.184035	0.0313374	-0.406945	8.02268e-07	-0.343151	4.04249e-05	-0.291269	0.000554047	-0.514492	1.26605e-10	-0.0613298	0.476502	0.0654488	0.447341
RAP2B	black	-0.0508773	0.554903	0.0645175	0.453846	-0.109599	0.202338	-0.051639	0.548985	0.106317	0.216265	-0.00179388	0.983402	0.0382489	0.657222	0.0678956	0.430506	0.477963	3.49612e-09	0.125495	0.143957	-0.197069	0.020989	-0.04544	0.598013	-0.0286413	0.739712	-0.370912	8.1253e-06	-0.265699	0.00170084	0.121996	0.155562	-0.161325	0.0596574	-0.0794793	0.355893	0.0990016	0.249733	-0.0608898	0.479676	0.252392	0.00292579	0.0907103	0.291799
RALA	black	-0.00779588	0.927958	0.210243	0.0136666	-0.0968209	0.260368	0.0662157	0.442025	0.0470731	0.584907	0.00968545	0.910562	0.00364279	0.966302	0.026279	0.760502	0.481152	2.65718e-09	0.154089	0.0722107	-0.200331	0.0189165	-0.218535	0.0103017	-0.160686	0.0606895	-0.2663	0.00165858	-0.188457	0.0274245	0.0683711	0.427277	-0.330802	7.87393e-05	-0.22115	0.00940385	-0.00254437	0.976459	0.0231423	0.78837	0.305228	0.00028694	0.122465	0.153968
AC245041.2	black	-0.117143	0.172801	0.277338	0.00103429	-0.0610194	0.47874	0.0188198	0.82721	0.137041	0.110294	-0.0859472	0.31798	-0.0475943	0.580752	0.0634919	0.461068	0.612893	1.71955e-15	0.322401	0.000121965	-0.0825297	0.337674	0.085574	0.320093	-0.189572	0.0265066	-0.191256	0.0251692	-0.25987	0.00216438	0.138579	0.106318	-0.351634	2.51529e-05	-0.16995	0.0470933	-0.139632	0.103661	-0.259808	0.0021699	0.100856	0.240929	-0.0221634	0.797125
AMIGO2	black	-0.0589727	0.493641	0.11251	0.190536	-0.182021	0.0332706	0.162441	0.0578922	0.195091	0.0223386	-0.0582686	0.498823	0.0295084	0.732128	0.129921	0.130235	0.492551	9.73498e-10	0.155476	0.0696505	-0.0336119	0.696594	-0.0535587	0.534211	-0.0370822	0.667045	-0.202514	0.0176301	-0.306803	0.000265861	0.125458	0.144078	-0.223884	0.00853966	-0.13861	0.10624	-0.0384964	0.655145	-0.0621765	0.470425	0.264457	0.00179127	-0.00996906	0.907955
RPN1	black	-0.071281	0.407822	0.232546	0.00624676	-0.0489644	0.569897	0.0365591	0.671468	0.176912	0.0386329	-0.0739091	0.390709	-0.0818341	0.341775	0.0995579	0.247069	0.55431	2.1079e-12	0.295374	0.000458153	-0.129596	0.131208	0.0379922	0.659378	-0.125566	0.143729	-0.0878056	0.307589	-0.230765	0.00666758	0.153944	0.0724811	-0.384549	3.49309e-06	-0.289763	0.000593658	-0.171808	0.0446983	-0.238211	0.00506122	0.0194759	0.821285	-0.0171258	0.842552
MCM2	black	-0.112262	0.191525	0.149269	0.0816999	0.233439	0.00604485	0.0468913	0.586359	0.243635	0.00411889	-0.0951024	0.268963	-0.00669036	0.938153	-0.036659	0.670622	0.802422	4.59666e-32	0.191313	0.0251254	0.0745757	0.386438	0.0495098	0.565602	-0.21238	0.0127185	-0.295348	0.0004587	-0.368248	9.54018e-06	0.20484	0.0163438	-0.197906	0.0204391	-0.043987	0.609782	-0.097847	0.255326	-0.248877	0.00336104	0.126685	0.140164	-0.0819604	0.341028
TXN	black	-0.0383409	0.65645	0.159596	0.0624806	0.166693	0.0515521	0.062046	0.471359	0.0586112	0.496298	-0.137247	0.109755	-0.040294	0.640144	-0.0955239	0.266838	0.581215	9.59181e-14	0.557472	1.48717e-12	0.0642362	0.45582	0.280937	0.000882947	-0.034604	0.688098	-0.209035	0.0142292	-0.349562	2.82797e-05	0.126517	0.140696	-0.474837	4.56254e-09	-0.402147	1.10952e-06	-0.350302	2.71226e-05	-0.547941	4.20942e-12	-0.170747	0.0460537	0.148306	0.0837114
PSMC1	black	0.0188049	0.827345	0.16601	0.052529	-0.00388425	0.964069	-0.00357575	0.966921	0.193661	0.0233603	0.112533	0.190445	0.0669697	0.436834	0.0850333	0.323172	0.480297	2.86084e-09	0.0286386	0.739736	-0.116135	0.176551	-0.473001	5.32843e-09	-0.53887	1.09971e-11	-0.221823	0.00918431	-0.131244	0.126335	0.168517	0.0490141	-0.269163	0.00147015	0.0178765	0.835746	0.0889983	0.301039	0.100038	0.244786	0.255937	0.00253892	0.242356	0.00432574
TNFAIP8L1	black	0.0286895	0.73929	0.105219	0.221077	0.0683271	0.427575	-0.0802869	0.351011	-0.0795199	0.355646	-0.1201	0.162138	-0.0328982	0.702729	-0.0731226	0.395785	0.457516	1.90246e-08	0.0725455	0.399534	-0.000624194	0.994224	0.168723	0.0487347	-0.236855	0.00532514	-0.318615	0.000147941	-0.326913	9.65709e-05	0.0959138	0.264881	-0.0362238	0.674309	-0.164656	0.0545133	0.026289	0.760413	-0.0717912	0.404466	0.247501	0.00354679	-0.21777	0.010578
ANO1	black	-0.0262718	0.760565	0.183366	0.0319686	-0.118685	0.167178	0.0517876	0.547835	0.102852	0.2317	-0.0596898	0.488392	-0.0789352	0.359206	0.000541214	0.994992	0.490488	1.17068e-09	0.313514	0.000191127	-0.274375	0.00117635	-0.165384	0.0534399	-0.197472	0.0207225	-0.276424	0.00107634	-0.26635	0.00165509	0.131091	0.126781	-0.374421	6.56283e-06	-0.146305	0.0880157	-0.123265	0.151277	-0.0720588	0.402712	0.25413	0.00272991	0.281099	0.000876658
CRABP2	black	-0.00634154	0.941371	0.129508	0.131471	-0.0553984	0.52024	0.185285	0.0301859	0.195888	0.0217864	-0.0743924	0.38761	-0.0399702	0.642835	-0.0668454	0.437687	0.51821	8.83069e-11	0.304074	0.000303361	-0.0254612	0.76774	0.203403	0.0171288	-0.0302589	0.725583	-0.279724	0.000931539	-0.265651	0.00170423	0.0526658	0.541058	-0.288716	0.0006227	-0.208667	0.0144049	-0.221584	0.00926169	-0.250829	0.00311257	0.157117	0.0667194	-0.114827	0.181507
CDC45	black	-0.0626448	0.467082	0.236769	0.00534221	0.208771	0.0143551	-0.00975401	0.909932	0.0714726	0.40656	-0.166433	0.0519221	-0.00495529	0.954171	-0.101522	0.23782	0.822801	6.16836e-35	0.381529	4.2251e-06	0.131266	0.126272	0.299912	0.000370093	-0.0557486	0.517602	-0.238079	0.00508646	-0.384255	3.55873e-06	0.0901385	0.294864	-0.311938	0.000206678	-0.20404	0.0167769	-0.270575	0.00138456	-0.461311	1.40091e-08	-0.0494361	0.566182	-0.100602	0.242124
NDRG2	black	0.103906	0.226924	-0.0912826	0.288753	-0.0156807	0.855687	-0.0548084	0.524701	-0.176904	0.0386423	0.020714	0.810132	-0.0456906	0.595993	-0.0519407	0.546651	-0.572552	2.67504e-13	-0.00943593	0.912857	0.0236562	0.783785	0.00279814	0.974112	0.0699553	0.41662	0.434321	1.14166e-07	0.325389	0.000104536	-0.181031	0.0342581	0.0890829	0.300578	-0.00875472	0.919126	-0.0517893	0.547822	0.0226963	0.792355	-0.36973	8.7269e-06	0.157596	0.0658816
CDCA4	black	-0.127133	0.138757	0.0657505	0.445246	0.200369	0.0188935	0.126529	0.140658	0.165444	0.0533521	-0.0528206	0.539868	0.0119802	0.889494	-0.000150486	0.998607	0.753818	2.16288e-26	0.331172	7.72125e-05	0.135831	0.113504	0.372401	7.42356e-06	0.0342334	0.691266	-0.234319	0.00585173	-0.374943	6.35587e-06	0.188615	0.0272924	-0.262886	0.00191187	-0.259267	0.00221834	-0.231289	0.00654138	-0.410215	6.41304e-07	0.0401296	0.64151	-0.235835	0.00553162
KRT7	black	-0.0557099	0.517894	0.139317	0.104449	-0.15753	0.0659975	0.229205	0.00705656	0.169691	0.0474358	-0.142101	0.0976348	-0.0413886	0.63108	0.0260979	0.762103	0.61263	1.78124e-15	0.437633	8.91172e-08	-0.045011	0.601477	0.257429	0.00239044	0.0389543	0.65131	-0.131111	0.126724	-0.31757	0.000155969	0.147756	0.0848778	-0.392071	2.15689e-06	-0.367483	9.98793e-06	-0.259871	0.00216431	-0.389478	2.55023e-06	-0.0405862	0.637719	-0.0647058	0.452526
SLC16A3	black	-0.0715408	0.406112	0.0993205	0.248204	-0.0483027	0.575127	0.0895255	0.298173	0.159921	0.0619425	-0.0358537	0.67745	0.0381243	0.658268	-0.0125092	0.884647	0.600259	9.01784e-15	0.511901	1.62322e-10	-0.194666	0.0226386	0.441836	6.48228e-08	0.123471	0.15059	-0.278111	0.000999914	-0.515519	1.14664e-10	0.0612012	0.477429	-0.465219	1.01815e-08	-0.363345	1.27718e-05	-0.176577	0.0390095	-0.44926	3.65594e-08	0.11944	0.164472	-0.0538464	0.532014
IER5	black	0.000557157	0.994844	0.0132023	0.878304	-0.0934146	0.277591	0.190583	0.025697	0.144511	0.0920243	0.017668	0.837634	0.0813149	0.344858	-0.037079	0.667072	0.399234	1.34766e-06	0.218293	0.0103885	0.094044	0.274352	0.238982	0.00491657	0.176485	0.0391124	-0.374685	6.45755e-06	-0.390777	2.3454e-06	0.0264084	0.759359	-0.141413	0.0992851	-0.156885	0.0671273	-0.157842	0.0654567	-0.266541	0.00164193	0.0659566	0.443818	-0.0464568	0.589838
PPIAP22	black	0.0247633	0.773932	0.277671	0.00101937	-0.000236897	0.997808	0.0686574	0.42534	0.140309	0.101979	-0.0159625	0.853122	-0.0432497	0.615793	0.0303537	0.724758	0.509559	2.02836e-10	0.237623	0.0051741	0.251154	0.0030729	0.0117838	0.891294	-0.138149	0.107419	-0.159713	0.0622862	-0.226369	0.00781588	-0.0594928	0.489831	-0.222569	0.00894597	-0.175888	0.0397909	-0.208803	0.01434	-0.281782	0.000850487	-0.106228	0.216654	0.0397127	0.644979
BIRC5	black	-0.0393817	0.647739	0.222033	0.00911661	0.12733	0.138143	0.0131941	0.878379	0.130442	0.128687	-0.133876	0.118843	0.0192134	0.823654	-0.0915685	0.287238	0.861781	1.28248e-41	0.306178	0.00027405	0.141506	0.0990618	0.275107	0.00113972	-0.169914	0.0471408	-0.248673	0.00338804	-0.394005	1.90169e-06	0.185675	0.0298345	-0.250027	0.00321257	-0.184951	0.0304901	-0.163336	0.0565065	-0.435904	1.01449e-07	-0.0160746	0.852102	-0.177208	0.0383039
PSMA6	black	-0.0766031	0.373622	0.226006	0.00791816	0.123335	0.151042	0.0121287	0.888133	0.172864	0.0433817	-0.00312601	0.97108	0.0754573	0.380833	0.0733623	0.394233	0.604782	5.02485e-15	0.124814	0.146166	-0.0404569	0.638791	-0.297343	0.000417797	-0.414983	4.60699e-07	-0.227027	0.00763363	-0.239461	0.00482844	0.384716	3.4564e-06	-0.286208	0.000697669	-0.104016	0.226431	0.0671104	0.435868	-0.131177	0.126529	0.0832919	0.333216	0.249592	0.00326807
SLC1A5	black	0.0859563	0.317929	0.0507633	0.555791	0.0919358	0.285301	0.162488	0.0578188	0.0751518	0.38277	0.0392274	0.649028	0.127727	0.136908	-0.0361479	0.674952	0.390104	2.44945e-06	0.358505	1.69552e-05	0.103893	0.226982	0.208856	0.0143147	-0.0910469	0.290004	-0.153962	0.0724472	-0.286037	0.00070306	0.258774	0.00226334	-0.312661	0.000199404	-0.208091	0.0146832	-0.197438	0.0207451	-0.382758	3.91125e-06	-0.0808022	0.347918	0.0965964	0.26148
MRPL47	black	-0.0480036	0.577499	0.18382	0.0315397	0.0230144	0.789512	-0.0571951	0.506779	0.0323654	0.707322	-0.111727	0.193663	0.00416156	0.961506	-0.0661164	0.442711	0.455553	2.22572e-08	0.0792083	0.357541	0.283671	0.000781841	0.16858	0.0489287	-0.233637	0.00600098	-0.202852	0.0174379	-0.155137	0.0702689	0.132817	0.121815	-0.036137	0.675045	-0.106118	0.217135	-0.0660583	0.443114	-0.200328	0.0189181	0.0154317	0.857954	-0.296296	0.000438828
CDKN2D	black	-0.0164462	0.848724	0.0350749	0.684078	0.0773994	0.36866	0.0439676	0.60994	0.0149556	0.862293	-0.158368	0.0645521	-0.0850247	0.323221	-0.220199	0.00972195	0.466096	9.47203e-09	0.281248	0.000870889	0.205981	0.0157434	0.412348	5.53436e-07	0.0777181	0.366686	-0.376312	5.84307e-06	-0.332831	7.07066e-05	0.0881704	0.305576	-0.0760562	0.377053	-0.262114	0.00197387	-0.235211	0.00566135	-0.376961	5.61394e-06	-0.0181806	0.832992	-0.198571	0.0200114
TKT	black	-0.0659572	0.443813	0.0829977	0.334932	0.242044	0.00437754	0.0926317	0.281655	0.131313	0.126133	-0.0234297	0.785805	0.103904	0.226933	-0.0317902	0.712293	0.389609	2.52893e-06	0.259547	0.00219313	0.18009	0.035219	0.208146	0.0146566	-0.0192362	0.823449	0.197122	0.0209535	-0.111258	0.195553	-0.0906096	0.292337	-0.263195	0.00188758	-0.154486	0.0714695	-0.135676	0.113921	-0.334999	6.29741e-05	-0.213261	0.0123447	-0.0921859	0.283987
CENPM	black	-0.0430422	0.61749	0.0598525	0.487206	0.190975	0.0253883	-0.110375	0.199143	-0.0850731	0.322945	-0.151294	0.0775966	-0.0079348	0.926678	-0.174653	0.0412267	0.558105	1.38624e-12	0.324028	0.000112163	0.165806	0.052825	0.496133	7.04596e-10	-0.047893	0.578378	-0.172009	0.0444446	-0.368915	9.16564e-06	0.103004	0.231004	-0.141594	0.09885	-0.197209	0.0208961	-0.193074	0.0237912	-0.498881	5.48467e-10	-0.122736	0.153052	-0.196471	0.0213898
FGD6	black	-0.0514812	0.550209	0.231623	0.00646187	-0.170012	0.0470124	-0.0153626	0.858584	0.133799	0.119057	0.0481602	0.576257	0.048865	0.570681	0.046902	0.586274	0.501872	4.16549e-10	0.384334	3.54087e-06	-0.249491	0.00328108	-0.217784	0.0105731	0.0252904	0.769253	-0.314203	0.000184679	-0.424036	2.42373e-07	0.260492	0.00211	-0.516227	1.07079e-10	-0.357235	1.82497e-05	-0.133955	0.118623	-0.181787	0.0335025	0.14402	0.0931465	0.483984	2.07762e-09
ASF1B	black	-0.110735	0.197675	0.228564	0.00722225	0.185837	0.0296896	-0.016786	0.845637	0.046971	0.585722	-0.125974	0.142423	0.0424306	0.622501	-0.038912	0.651664	0.836259	4.82501e-37	0.492799	9.52042e-10	0.0258757	0.764068	0.315521	0.0001729	-0.00747578	0.930909	-0.331823	7.45936e-05	-0.476186	4.06865e-09	0.271327	0.00134085	-0.357298	1.81833e-05	-0.268371	0.00152023	-0.279439	0.000943315	-0.584553	6.40849e-14	-0.131348	0.126031	0.0797111	0.354488
AHNAK2	black	-0.0307088	0.72167	0.228893	0.00713677	0.000857826	0.992062	0.120516	0.160677	0.122025	0.155463	-0.00841366	0.922267	-0.0137345	0.873439	-0.0145863	0.865661	0.58945	3.51681e-14	0.521784	6.22044e-11	-0.223995	0.00850607	-0.00536054	0.950428	-0.0175449	0.838751	-0.357837	1.76247e-05	-0.425285	2.21486e-07	0.0412813	0.631965	-0.621666	5.20593e-16	-0.355046	2.07027e-05	-0.263577	0.00185797	-0.252712	0.00288882	0.224659	0.00830786	0.304343	0.000299457
LMNB2	black	-0.0274658	0.750035	0.0773276	0.369106	0.15482	0.0708518	0.0481899	0.576022	0.145736	0.0892715	-0.157389	0.0662426	-0.0683434	0.427465	-0.0293509	0.733503	0.665449	7.303e-19	0.405369	8.92935e-07	0.0178849	0.83567	0.343141	4.04472e-05	0.0147483	0.864183	-0.304632	0.000295318	-0.352681	2.36994e-05	0.0125055	0.884681	-0.333307	6.89369e-05	-0.26838	0.00151967	-0.307892	0.00025213	-0.387805	2.83927e-06	0.0407861	0.636062	-0.0495931	0.564948
ALDOC	black	0.0136588	0.87413	0.0544596	0.527346	0.00889382	0.917846	-0.0319393	0.711003	-0.014454	0.866867	-0.0117763	0.891363	0.102776	0.232043	-0.127828	0.136594	0.465323	1.00943e-08	0.351925	2.47413e-05	-0.0722962	0.40116	0.186253	0.0293194	-0.0214904	0.803157	-0.383603	3.70829e-06	-0.270385	0.00139579	0.0036422	0.966307	-0.329568	8.40346e-05	-0.201865	0.0180047	-0.206815	0.0153165	-0.305187	0.000287513	0.0577295	0.50281	0.0611194	0.478018
CDCP1	black	-0.0349661	0.685006	0.243125	0.00420029	-0.0814941	0.343792	0.106762	0.214339	0.202107	0.0178644	-0.0923914	0.282911	-0.0123561	0.886049	-0.0905571	0.292618	0.632183	1.18178e-16	0.567504	4.79675e-13	-0.278737	0.000972841	-0.0399506	0.642998	-0.0901558	0.294771	-0.228428	0.00725795	-0.337578	5.48062e-05	0.144678	0.0916458	-0.662014	1.27251e-18	-0.369874	8.6511e-06	-0.271601	0.00132524	-0.361082	1.45891e-05	0.0221146	0.797562	0.380178	4.5976e-06
COL7A1	black	-0.0930328	0.279568	0.10936	0.20333	-0.00256077	0.976308	0.0407657	0.636231	0.12994	0.130178	-0.00594965	0.944989	0.00258623	0.976072	-0.0158526	0.854123	0.497428	6.26326e-10	0.237899	0.00512098	-0.117161	0.172735	0.265065	0.00174646	0.194506	0.0227524	-0.293892	0.000490849	-0.307139	0.000261554	0.0387837	0.652738	-0.241826	0.00441411	-0.20478	0.0163759	-0.133428	0.120094	-0.139839	0.103144	0.303948	0.000305207	-0.189992	0.0261675
RHNO1	black	-0.246199	0.00373098	0.225676	0.00801191	0.118708	0.167096	-0.00198479	0.981635	0.0301907	0.726177	0.0251646	0.77037	-0.0285895	0.740167	0.209104	0.0141966	0.346074	3.43807e-05	0.151474	0.0772405	0.213169	0.0123831	-0.087359	0.310066	-0.12497	0.145659	0.0334974	0.697576	-0.084059	0.328767	0.116386	0.175614	-0.197247	0.0208712	-0.175565	0.0401625	-0.0990568	0.249468	-0.18317	0.0321561	-0.118006	0.169636	0.05924	0.491681
HMGA1	black	0.0460627	0.593	0.159921	0.0619421	0.137269	0.109699	0.145179	0.0905158	0.108782	0.205746	-0.0956658	0.266124	-0.0529235	0.539078	-0.10371	0.227807	0.680059	6.33067e-20	0.530827	2.51644e-11	0.119309	0.164941	0.269784	0.00143192	0.167105	0.0509696	-0.275152	0.00113747	-0.447024	4.35037e-08	-0.022862	0.790874	-0.451568	3.0511e-08	-0.41213	5.61867e-07	-0.459275	1.6516e-08	-0.479393	3.0923e-09	-0.099859	0.245636	0.0729225	0.397082
SAE1	black	0.0561891	0.514294	0.0382556	0.657166	0.0957703	0.2656	0.10639	0.215949	0.198984	0.0197498	-0.033284	0.69941	-0.0372047	0.666011	-0.0443456	0.606868	0.446498	4.53143e-08	-0.00222286	0.979433	0.147467	0.0854956	-0.0799615	0.352973	-0.296719	0.000430215	-0.206418	0.0155187	-0.115877	0.177523	0.199261	0.0195756	-0.0437972	0.611327	0.0462321	0.591639	0.030207	0.726035	-0.035565	0.679904	0.143811	0.0936271	-0.0769841	0.371243
KRT17	black	-0.0540281	0.530628	0.0248339	0.773305	-0.0963871	0.262519	0.131839	0.124611	0.0771387	0.370281	-0.196815	0.0211584	-0.104681	0.223459	-0.0183252	0.831683	0.468514	7.75507e-09	0.209927	0.0138121	-0.0537447	0.53279	0.239308	0.00485647	0.0602708	0.484162	-0.280984	0.000881118	-0.160686	0.0606883	0.0578389	0.502	-0.149141	0.0819647	-0.119921	0.162768	-0.194433	0.022804	-0.139217	0.104701	0.191023	0.0253508	-0.243606	0.00412356
RNU2-27P	black	-0.0924574	0.282566	0.150185	0.079824	-0.0511645	0.552668	0.118993	0.166069	0.0758361	0.37844	0.0331343	0.700697	0.0978736	0.255196	-0.0756637	0.379528	0.404878	9.23104e-07	0.219499	0.00996232	-0.108361	0.207517	-0.295564	0.000454092	-0.0513126	0.551517	-0.297891	0.000407169	-0.376915	5.62957e-06	-0.0084883	0.921579	-0.356496	1.90453e-05	-0.140133	0.102416	-0.150808	0.0785657	-0.0598587	0.48716	0.177698	0.0377636	0.407379	7.7888e-07
NME1	black	-0.0176591	0.837716	0.151287	0.0776122	0.124443	0.147376	-0.0848025	0.324492	-0.0124085	0.885569	-0.149156	0.0819328	-0.0249003	0.772716	-0.0686702	0.425253	0.540228	9.54177e-12	0.274437	0.0011732	0.466619	9.07263e-09	0.385243	3.34272e-06	-0.156596	0.0676396	-0.0673511	0.434221	-0.183653	0.0316965	0.0119371	0.889889	-0.196975	0.0210517	-0.224116	0.00846969	-0.212343	0.0127344	-0.404026	9.77792e-07	-0.093688	0.276181	-0.340395	4.7026e-05
WNT7B	black	-0.0454561	0.597883	0.193428	0.0235309	-0.0263032	0.760287	0.125351	0.144424	0.108839	0.205507	-0.229357	0.00701777	-0.144478	0.0920988	-0.0488849	0.570524	0.559333	1.20893e-12	0.396586	1.60565e-06	-0.12822	0.135384	0.145508	0.08978	-0.147154	0.0861688	-0.186536	0.0290695	-0.25501	0.00263532	0.0257795	0.76492	-0.424256	2.38565e-07	-0.225952	0.00793328	-0.241169	0.00452588	-0.259189	0.00222546	0.110269	0.199577	-0.0296219	0.731137
PLEKHA4	black	0.235262	0.0056506	-0.261946	0.00198759	-0.202448	0.0176678	-0.121882	0.155953	-0.0223451	0.795497	-0.0553756	0.520412	-0.0974263	0.257385	0.0239734	0.780959	-0.445951	4.72697e-08	-0.113777	0.185561	0.101965	0.235768	0.340202	4.7523e-05	0.208928	0.0142803	0.12917	0.13249	0.218901	0.0101716	-0.0968302	0.260322	0.260002	0.00215269	-0.00784994	0.92746	0.0225072	0.794047	0.065007	0.450421	-0.155637	0.0693584	-0.334883	6.33676e-05
PLA2G16	black	-0.0799297	0.353165	0.23181	0.00641778	-0.202293	0.0177568	0.0479485	0.577937	0.194221	0.022956	-0.00376694	0.965154	0.0219379	0.799144	-0.0252689	0.769444	0.472412	5.599e-09	0.316787	0.000162245	-0.0317729	0.712442	0.123971	0.148928	-0.0461262	0.592489	-0.240737	0.00460077	-0.293248	0.00050572	0.200334	0.0189142	-0.289358	0.000604733	-0.209401	0.0140566	-0.22698	0.00764645	-0.260591	0.00210142	0.0853244	0.321512	0.00482663	0.95536
CDK6	black	-0.0124584	0.885113	0.280932	0.000883167	-0.0305351	0.72318	0.10328	0.229751	0.0803986	0.350339	-0.00752132	0.930489	-0.0485379	0.573266	0.0637316	0.459374	0.418974	3.47906e-07	0.194707	0.0226091	-0.220743	0.00953887	-0.316426	0.00016522	-0.168489	0.0490517	-0.0433373	0.615077	-0.101353	0.238607	0.016956	0.844093	-0.404594	9.41035e-07	-0.144296	0.0925133	-0.153101	0.0740792	0.0325032	0.706134	0.151252	0.0776804	0.232445	0.00626999
SAPCD2	black	0.0226614	0.792667	0.0998837	0.245519	0.146685	0.0871848	0.039782	0.644402	0.0660095	0.443451	-0.0878752	0.307205	0.0203425	0.813475	-0.105068	0.221744	0.729833	4.68239e-24	0.645037	1.78338e-17	0.0543513	0.528169	0.403327	1.02498e-06	0.0133638	0.876827	-0.279395	0.000945131	-0.454096	2.49898e-08	0.0793288	0.356807	-0.535144	1.61805e-11	-0.392391	2.11247e-06	-0.417081	3.9766e-07	-0.656513	3.04974e-18	-0.163993	0.0555069	0.134316	0.117625
GJB5	black	-0.0466966	0.587917	0.146495	0.0876	-0.151219	0.0777458	0.113699	0.185866	0.140806	0.10076	-0.0351373	0.683546	0.0453192	0.598987	-0.0449	0.602374	0.459775	1.58636e-08	0.210187	0.0136922	-0.0645882	0.45335	0.175257	0.0405187	-0.0991991	0.248786	-0.309352	0.000234747	-0.263208	0.00188663	0.277331	0.00103463	-0.0957399	0.265752	-0.0308525	0.720421	-0.079207	0.357549	-0.258362	0.00230164	0.0629094	0.465199	-0.0386565	0.653804
SLC35F2	black	-0.0309633	0.719459	0.335622	6.09022e-05	0.000390087	0.99639	0.0590694	0.492931	0.0336124	0.69659	-0.0884992	0.303769	-0.0514624	0.550355	-0.0164188	0.848973	0.692669	6.82509e-21	0.519522	7.76867e-11	-0.0666021	0.43936	0.0790653	0.358412	-0.117827	0.170288	-0.143357	0.0946776	-0.403645	1.00322e-06	0.0569012	0.508968	-0.556816	1.59917e-12	-0.349604	2.82118e-05	-0.366969	1.02991e-05	-0.401615	1.14983e-06	-0.01733	0.840699	0.20408	0.0167553
FAF1	black	-0.0415649	0.629625	0.177042	0.0384883	0.133709	0.119308	-0.0490936	0.568878	0.193457	0.0235098	0.00671521	0.937923	0.0264305	0.759163	-0.0753742	0.381359	0.40926	6.8483e-07	0.204688	0.0164255	0.406067	8.51626e-07	0.223866	0.00854507	-0.196525	0.0213534	0.0414607	0.630484	-0.00247346	0.977115	-0.0167103	0.846324	-0.181948	0.0333426	-0.193278	0.0236409	-0.196631	0.0212818	-0.312465	0.000201349	-0.184697	0.0307232	-0.30365	0.000309609
AURKA	black	-0.0521208	0.545259	0.239388	0.00484172	0.143407	0.0945627	0.0952488	0.268223	0.147109	0.0862663	-0.111908	0.192938	0.02308	0.788927	-0.0136497	0.874213	0.908846	4.10951e-53	0.380833	4.4133e-06	0.0625897	0.467475	0.0983426	0.252915	-0.172607	0.043699	-0.276355	0.0010796	-0.40211	1.11229e-06	0.277931	0.00100784	-0.38383	3.65557e-06	-0.225622	0.00802742	-0.22903	0.00710144	-0.45244	2.84862e-08	-0.0581761	0.499506	0.0725612	0.399431
P2RY2	black	-0.0824556	0.338109	0.158075	0.0650542	0.0368264	0.669206	0.15415	0.0720965	0.20217	0.0178277	-0.124491	0.147218	-0.0628596	0.465553	-0.180551	0.0347455	0.65575	3.43771e-18	0.573586	2.37054e-13	-0.13955	0.103867	0.180722	0.0345706	-0.164874	0.0541903	-0.252397	0.0029252	-0.35162	2.51729e-05	0.0988123	0.250644	-0.536547	1.39975e-11	-0.375728	6.05701e-06	-0.303646	0.000309678	-0.482256	2.41472e-09	-0.0471743	0.584099	0.228455	0.0072507
GNA15	black	-0.0444811	0.605768	0.0937321	0.275953	0.000680908	0.993699	0.0594982	0.489792	0.112859	0.189157	-0.0937727	0.275745	-0.00281045	0.973998	-0.031517	0.714658	0.584581	6.38695e-14	0.392362	2.11651e-06	-0.0768651	0.371985	0.334235	6.56043e-05	0.0312126	0.717296	-0.308779	0.000241429	-0.4381	8.60372e-08	0.213852	0.0120992	-0.300054	0.000367616	-0.256598	0.00247216	-0.0568951	0.509014	-0.415102	4.56885e-07	0.068177	0.428593	-0.0245998	0.775385
CGAS	black	-0.0129586	0.880534	0.0405752	0.63781	0.0295465	0.731795	-0.0175523	0.838684	-0.00899764	0.91689	0.0803054	0.3509	0.139874	0.103058	0.0845224	0.326098	0.399354	1.33692e-06	0.164866	0.0542019	-0.00771176	0.928734	-0.0626717	0.466891	-0.0783117	0.363026	-0.304732	0.000293903	-0.398502	1.41469e-06	0.277852	0.00101133	-0.197907	0.0204384	-0.13923	0.104669	-0.0407158	0.636645	-0.183201	0.032126	0.0556324	0.518477	0.230174	0.0068128
PDZD11	black	-0.101746	0.236783	0.196013	0.0217003	-0.0833185	0.333061	-0.00204598	0.981069	0.0310049	0.719098	0.0396309	0.645661	0.079756	0.354215	-0.00240017	0.977793	0.517076	9.86122e-11	0.418826	3.5157e-07	0.0694486	0.420012	0.223397	0.00868829	-0.137745	0.108461	-0.203654	0.0169895	-0.378435	5.12424e-06	0.229283	0.00703677	-0.400186	1.26494e-06	-0.434812	1.10073e-07	-0.177247	0.0382603	-0.406499	8.26974e-07	0.0367577	0.669787	0.0506459	0.556706
CELSR1	black	0.0397383	0.644766	0.115938	0.177293	0.0648243	0.451697	0.0524533	0.542694	0.119427	0.16452	-0.229115	0.00707975	-0.0546378	0.525994	0.0143333	0.867969	0.609292	2.77835e-15	0.356875	1.86336e-05	-0.243763	0.0040987	0.0722765	0.401289	0.0817382	0.342343	-0.364921	1.1635e-05	-0.459904	1.56992e-08	0.0514189	0.550692	-0.391263	2.2728e-06	-0.126415	0.141018	-0.171738	0.0447864	-0.214038	0.0120229	0.208625	0.0144251	0.121974	0.155638
E2F1	black	-0.0524789	0.542497	0.208842	0.0143214	0.185932	0.0296043	-0.0312589	0.716894	0.1453	0.0902439	-0.186336	0.0292461	-0.0367384	0.66995	-0.134895	0.116035	0.825546	2.37253e-35	0.42455	2.33568e-07	0.134464	0.117216	0.36705	1.02495e-05	-0.0681041	0.429088	-0.239532	0.0048156	-0.393448	1.97206e-06	0.0926694	0.281459	-0.32856	8.86047e-05	-0.285984	0.00070475	-0.297724	0.000410384	-0.520141	7.31135e-11	-0.0835457	0.33174	-0.128443	0.134703
BCAR3	black	-0.126816	0.139751	0.197897	0.0204449	-0.0939585	0.27479	0.207422	0.0150125	0.216231	0.0111543	-0.118755	0.166924	-0.0576128	0.503676	-0.0345478	0.688577	0.615213	1.25827e-15	0.292735	0.000517848	-0.146565	0.0874464	0.0259175	0.763699	-0.115621	0.178488	-0.237465	0.00520485	-0.283827	0.000776407	0.117841	0.17024	-0.346608	3.33736e-05	-0.200223	0.0189822	-0.162232	0.0582183	-0.162667	0.0575388	0.21871	0.0102392	-0.0232233	0.787647
TTC9	black	0.0287167	0.739052	-0.072806	0.397839	-0.0731734	0.395456	0.21081	0.0134091	0.023123	0.788542	0.00189609	0.982456	0.0482506	0.575541	-0.149613	0.0809903	0.482768	2.30973e-09	0.349042	2.91191e-05	-0.0150585	0.861355	0.172614	0.0436904	0.0395612	0.646242	-0.258384	0.00229954	-0.343175	4.0371e-05	-0.0136499	0.874211	-0.253803	0.00276586	-0.185265	0.030204	-0.231194	0.006564	-0.316079	0.000168122	-0.000725077	0.993291	0.0272788	0.751681
BOLA2-SMG1P6	black	0.0579914	0.500872	0.187638	0.0281159	0.0588613	0.494459	-0.00226821	0.979014	0.0884021	0.304302	-0.0420688	0.625474	-0.0300243	0.727627	-0.0735519	0.393009	0.56174	9.23186e-13	0.220477	0.00962797	-0.159435	0.0627493	-0.154175	0.0720499	-0.378619	5.06608e-06	-0.279326	0.000948015	-0.279264	0.000950612	0.205236	0.0161334	-0.344623	3.72668e-05	-0.190101	0.0260803	-0.0930988	0.279225	-0.124079	0.148573	0.174996	0.0408233	0.202999	0.0173552
OSBPL10	black	-0.046246	0.591528	0.149132	0.0819843	-0.0043059	0.960172	0.134923	0.11596	-0.000803468	0.992565	-0.00309074	0.971406	0.148243	0.0838435	-0.0464647	0.589774	0.553627	2.27188e-12	0.262203	0.00196665	0.00191644	0.982268	-0.123494	0.150512	-0.0199127	0.817346	-0.504276	3.3324e-10	-0.411303	5.94965e-07	0.0334999	0.697555	-0.325065	0.000106308	-0.168113	0.0495674	-0.171076	0.0456291	-0.105498	0.219848	0.233831	0.00595823	0.170323	0.0466041
AURKB	black	-0.0767299	0.372829	0.176167	0.0394734	0.199707	0.0192985	0.0563885	0.5128	0.0811273	0.345975	-0.183383	0.0319532	0.0616766	0.474007	-0.116558	0.174969	0.758564	6.93402e-27	0.301083	0.00035007	0.267282	0.00159164	0.448089	4.00528e-08	0.0849087	0.323884	-0.26706	0.0016065	-0.424382	2.36402e-07	0.21659	0.0110175	-0.119234	0.165209	-0.190058	0.0261143	-0.190938	0.0254171	-0.53631	1.43452e-11	-0.156253	0.06825	-0.216768	0.0109501
BTG2	black	-0.023818	0.782343	-0.0405696	0.637857	0.0211502	0.806212	-0.146124	0.0884146	-0.0819393	0.341153	0.165288	0.0535796	0.0765626	0.373875	0.0249815	0.771994	-0.618819	7.70341e-16	-0.404338	9.57432e-07	0.196808	0.0211633	-0.197157	0.0209305	0.00521547	0.951768	0.387263	2.93931e-06	0.440404	7.22823e-08	-0.186627	0.0289901	0.431091	1.45007e-07	0.268496	0.00151224	0.159915	0.0619518	0.317794	0.000154216	-0.214664	0.0117689	-0.0301659	0.726393
SHCBP1	black	-0.107177	0.212552	0.161045	0.0601081	0.112316	0.191308	0.00165139	0.98472	0.142695	0.0962288	-0.0869641	0.312266	0.0242662	0.778352	-0.0551217	0.52233	0.822046	8.00025e-35	0.111063	0.196342	0.0241406	0.77947	-0.0504117	0.558535	-0.266287	0.00165947	-0.320313	0.000135709	-0.328886	8.70997e-05	0.23552	0.00559672	-0.152452	0.0753274	-0.0345497	0.688562	-0.0235719	0.784536	-0.19778	0.0205212	0.101909	0.236027	-0.0182779	0.832111
GPBAR1	black	0.103305	0.229639	-0.126528	0.140662	-0.096287	0.263018	-0.0572613	0.506286	-0.174686	0.0411876	-0.0351903	0.683094	-0.112388	0.191023	-0.0694826	0.419783	-0.411331	5.9382e-07	-0.0818211	0.341852	-0.192238	0.0244166	0.072757	0.398158	-0.055979	0.515871	0.219741	0.0098784	0.31019	0.000225291	-0.0609365	0.479339	0.101335	0.23869	0.0370452	0.667358	0.139109	0.104974	0.137386	0.109393	-0.110489	0.198677	-0.0270406	0.75378
CMC2	black	-0.0318615	0.711676	0.134905	0.116009	0.087052	0.311775	0.0513701	0.551071	0.0362086	0.674438	-0.0404456	0.638885	0.0286237	0.739866	-0.0837831	0.330363	0.529822	2.78641e-11	0.34801	3.08566e-05	0.380596	4.47918e-06	0.378097	5.23291e-06	-0.180352	0.0349493	-0.127392	0.137947	-0.277215	0.00103989	0.0527016	0.540783	-0.257874	0.00234771	-0.38293	3.86907e-06	-0.204966	0.0162767	-0.50547	2.98078e-10	-0.1775	0.0379813	-0.166109	0.052387
CCNB1	black	-0.0910455	0.290012	0.226624	0.00774483	0.145183	0.0905064	0.049418	0.566324	0.174432	0.0414879	-0.0994059	0.247796	-0.00637165	0.941093	-0.0199909	0.816642	0.86381	5.07345e-42	0.389752	2.50566e-06	0.106626	0.214928	0.171791	0.0447188	-0.101934	0.235912	-0.259276	0.00221751	-0.417813	3.77664e-07	0.297396	0.000416756	-0.37528	6.22603e-06	-0.260476	0.00211135	-0.223927	0.00852671	-0.449533	3.57869e-08	-0.0296485	0.730904	0.0183099	0.831821
LRRC20	black	-0.0654185	0.447552	0.136855	0.110783	0.0219458	0.799074	0.0198524	0.817889	0.0221484	0.797258	-0.118716	0.167064	-0.0891942	0.299972	-0.0923636	0.283056	0.428404	1.76584e-07	0.292553	0.000522239	-0.0266079	0.757596	0.184983	0.0304607	-0.247579	0.00353595	-0.15168	0.0768357	-0.161973	0.0586262	-0.0293323	0.733666	-0.271884	0.00130932	-0.185512	0.029981	-0.184823	0.0306073	-0.213066	0.0124263	0.113389	0.187076	-0.104253	0.225367
SSBP1	black	-0.0761133	0.376694	0.133311	0.12042	0.15311	0.0740608	0.041766	0.627967	0.0541507	0.529695	-0.141684	0.0986337	0.0593858	0.490614	-0.148711	0.08286	0.435183	1.07064e-07	0.238028	0.00509608	0.270014	0.00141802	0.247915	0.00348993	-0.152561	0.0751156	-0.120914	0.159288	-0.201654	0.0181273	0.151277	0.0776322	-0.148978	0.0823034	-0.165514	0.0532489	-0.124447	0.147364	-0.382506	3.97367e-06	-0.140614	0.10123	-0.101086	0.239855
BUB1B	black	-0.0740729	0.389657	0.268131	0.00153569	0.136821	0.110872	0.00727457	0.932764	0.131635	0.1252	-0.11291	0.188957	-0.00384056	0.964473	-0.0447312	0.603741	0.88082	1.1278e-45	0.404025	9.77889e-07	-0.0442459	0.607678	0.051916	0.546841	-0.0779609	0.365186	-0.340284	4.73109e-05	-0.441925	6.43862e-08	0.268565	0.00150778	-0.414755	4.6811e-07	-0.244059	0.00405238	-0.235781	0.00554262	-0.416957	4.01142e-07	-0.000496997	0.995401	0.221471	0.00929834
RPL39L	black	-0.0372934	0.665262	0.0625427	0.46781	-0.0750406	0.383476	0.0417241	0.628312	0.242271	0.0043397	-0.0455892	0.59681	0.0240019	0.780704	-0.0237944	0.782553	0.532475	2.1275e-11	0.0868271	0.313032	-6.19053e-05	0.999427	0.197439	0.0207443	-0.216692	0.0109787	-0.18945	0.0266052	-0.251099	0.00307957	0.21529	0.0115202	-0.0700502	0.415987	-0.0881222	0.305842	-0.0076205	0.929575	-0.153856	0.0726471	0.208943	0.014273	-0.300917	0.000352845
PARP2	black	-0.0817922	0.342024	0.0674733	0.433385	0.22675	0.00770991	0.0657058	0.445556	0.192376	0.0243124	0.00124286	0.9885	0.0916822	0.286638	0.0321724	0.708989	0.573998	2.25897e-13	0.275289	0.00113077	0.15371	0.0729221	0.21273	0.0125688	0.101963	0.235778	-0.18347	0.0318701	-0.211864	0.0129417	0.166518	0.0518008	-0.311087	0.000215553	-0.254331	0.00270803	-0.189668	0.0264283	-0.330424	8.03267e-05	0.00939634	0.913222	-0.0891247	0.30035
NUCB2	blue	-0.0918814	0.285588	0.0605519	0.482123	0.10778	0.209979	-0.106236	0.216621	-0.071425	0.406874	-0.0433539	0.614942	-0.0817566	0.342235	0.027085	0.753389	-0.369029	9.103e-06	-0.412473	5.4867e-07	0.18817	0.0276656	-0.227379	0.00753764	-0.300037	0.00036791	0.716705	7.01064e-23	0.576872	1.6101e-13	-0.149207	0.0818289	0.229172	0.0070651	0.186102	0.0294532	0.221462	0.00930146	0.302155	0.000332609	-0.0655152	0.44688	-0.28828	0.000635181
TMEM52	blue	-0.11091	0.196961	0.129053	0.132844	0.170851	0.0459194	-0.109199	0.204	-0.00664769	0.938546	0.0648621	0.451433	-0.0410103	0.634206	0.0964355	0.262279	-0.145174	0.0905263	0.0188674	0.82678	0.22893	0.0071274	0.131437	0.125773	-0.133462	0.119997	0.871014	1.6663e-43	0.288457	0.000630069	-0.192402	0.0242931	-0.0726076	0.399129	-0.0599675	0.486368	-0.0899953	0.295635	-0.130793	0.127655	-0.312366	0.000202335	-0.218696	0.0102443
MT-ND1	blue	0.0971287	0.258848	-0.12713	0.138767	-0.127303	0.138226	0.0556283	0.518508	-0.0433945	0.614611	-0.0763481	0.37522	-0.0556165	0.518597	-0.0141821	0.86935	-0.0195948	0.820213	0.23623	0.00545076	-0.0322475	0.70834	0.393384	1.98033e-06	0.512791	1.49076e-10	-0.356644	1.88834e-05	-0.182379	0.0329198	-0.13637	0.112065	-0.0109442	0.898997	-0.185787	0.0297337	-0.299575	0.000376056	-0.216049	0.0112243	-0.142046	0.0977678	-0.0218101	0.80029
GRAMD1C	blue	-0.178505	0.0368887	0.159721	0.0622731	-0.0950848	0.269052	-0.0287187	0.739035	0.0851408	0.322558	-0.00366138	0.96613	-0.0237998	0.782505	0.164702	0.0544445	-0.0390786	0.650271	0.262258	0.00196214	-0.0639496	0.457837	-0.136699	0.111195	-0.00429382	0.960284	0.494613	8.08562e-10	0.0350624	0.684185	0.0299212	0.728526	-0.340478	4.68137e-05	-0.185276	0.0301946	-0.229948	0.00686879	-0.197527	0.0206866	-0.325368	0.00010465	0.302296	0.00033038
VNN2	blue	-0.0715994	0.405726	-0.0222279	0.796547	-0.115562	0.178711	-0.0721532	0.402094	-0.0405681	0.637869	0.0869912	0.312115	0.112327	0.191266	0.0913361	0.288469	-0.322968	0.000118462	-0.30804	0.00025031	0.0563994	0.512719	-0.11277	0.189508	-0.00745821	0.931071	0.447591	4.16308e-08	0.268933	0.00148454	-0.000963826	0.991081	0.268105	0.0015374	0.307294	0.000259589	0.195319	0.0221798	0.15681	0.0672599	-0.206716	0.015367	-0.120548	0.160566
ONECUT1	blue	-0.0246788	0.774683	0.00759579	0.929803	-0.0807442	0.348265	0.0621548	0.47058	-0.00813596	0.924825	0.0526433	0.541231	-0.0275984	0.748868	0.155918	0.0688519	-0.284457	0.00075482	-0.0125641	0.884145	-0.0851374	0.322578	-0.143318	0.0947698	0.0875622	0.308937	0.721284	2.77603e-23	0.295921	0.000446589	-0.061647	0.47422	-0.111093	0.196217	0.00468748	0.956646	-0.0316746	0.713293	0.00577479	0.946603	-0.342214	4.25649e-05	0.138926	0.105436
KCNJ5	blue	-0.0183821	0.831168	-0.00276967	0.974375	0.110171	0.199981	-0.111513	0.194522	0.0385952	0.654317	0.0672513	0.434904	0.0454933	0.597583	0.10773	0.21019	-0.438949	8.06975e-08	-0.451876	2.97802e-08	0.122879	0.152571	-0.197606	0.020635	-0.246561	0.00367893	0.800033	9.48878e-32	0.535399	1.57607e-11	-0.0862486	0.316279	0.282225	0.000833919	0.250294	0.00317897	0.407995	7.46781e-07	0.331784	7.47487e-05	-0.0575564	0.504094	-0.28312	0.000801344
ECHDC3	blue	-0.126063	0.142138	-0.0575567	0.504092	0.0911625	0.28939	-0.0753052	0.381796	0.00702083	0.935104	0.00689931	0.936225	-0.0796386	0.354927	0.169401	0.0478222	-0.413377	5.1528e-07	-0.477368	3.67859e-09	0.156322	0.0681265	-0.0662567	0.441742	-0.270121	0.00141158	0.650251	8.06943e-18	0.592631	2.36838e-14	-0.0456327	0.59646	0.37631	5.84393e-06	0.214679	0.0117629	0.40274	1.06628e-06	0.305532	0.000282761	-0.0909894	0.290311	-0.451819	2.99129e-08
PDCD4	blue	-0.089542	0.298084	-0.0301428	0.726595	0.0373837	0.664501	-0.156886	0.0671263	-0.106191	0.216814	0.0434656	0.61403	-0.034927	0.685339	0.10958	0.202417	-0.574804	2.05484e-13	-0.56059	1.0505e-12	0.147968	0.0844249	-0.282518	0.000823116	-0.108075	0.208725	0.675448	1.39057e-19	0.582448	8.2691e-14	-0.0309075	0.719944	0.509106	2.11727e-10	0.346973	3.26999e-05	0.27992	0.000923516	0.352724	2.36416e-05	-0.238511	0.00500451	-0.159596	0.0624813
LRIG1	blue	0.02101	0.807471	-0.0492997	0.567255	0.159069	0.0633633	-0.116398	0.175566	-0.109979	0.200768	0.165487	0.0532893	0.0279143	0.746091	0.150288	0.0796137	-0.500964	4.52963e-10	-0.337186	5.59808e-05	-0.0619562	0.472002	-0.25318	0.0028355	-0.0719782	0.40324	0.517784	9.20556e-11	0.26692	0.00161601	-0.17633	0.0392877	0.199932	0.0191602	0.190038	0.0261308	0.22615	0.00787728	0.393089	2.01879e-06	0.102065	0.235307	0.0233424	0.786584
NR5A2	blue	-0.0451168	0.600622	0.00479607	0.955642	-0.068237	0.428186	-0.0941131	0.273998	0.0200748	0.815886	-0.0207904	0.809445	-0.0439861	0.609789	0.135479	0.114451	-0.393425	1.9751e-06	-0.124563	0.146985	-0.049629	0.564666	-0.170349	0.0465701	-0.0267029	0.756758	0.840209	1.06795e-37	0.406274	8.39753e-07	-0.0506816	0.556428	0.00997188	0.907929	0.0742076	0.388793	0.0388773	0.651955	0.0701098	0.415589	-0.350453	2.68928e-05	0.0794657	0.355975
PBX1	blue	0.015818	0.854438	0.00846744	0.921771	-0.0479196	0.578167	-0.0480818	0.576879	0.0712265	0.408182	0.102333	0.234075	-0.0321865	0.708867	0.0862117	0.316487	-0.452635	2.80502e-08	-0.188289	0.027565	-0.147082	0.0863235	-0.482783	2.30676e-09	-0.186324	0.0292564	0.523363	5.32159e-11	0.445417	4.92607e-08	-0.154878	0.0707445	-0.0483319	0.574897	0.0940587	0.274276	0.101325	0.23874	0.366763	1.04269e-05	-0.0254567	0.76778	0.248409	0.00342326
SORBS2	blue	-0.0476269	0.580493	0.113587	0.186299	-0.0713064	0.407655	-0.0841209	0.32841	0.0924694	0.282503	-0.0157137	0.855386	-0.12951	0.131466	0.145315	0.0902092	-0.293661	0.000496137	-0.0339291	0.693873	-0.16524	0.0536502	-0.219111	0.0100976	-0.163762	0.0558563	0.68491	2.72307e-20	0.426317	2.05544e-07	-0.220036	0.00977733	-0.140968	0.100365	0.00383556	0.96452	-0.010253	0.905346	0.149332	0.0815702	-0.157358	0.0662961	0.0344882	0.689087
LINC00982	blue	0.15945	0.0627241	-0.120947	0.159176	0.0150709	0.861241	0.027811	0.746999	0.0565982	0.511231	0.0159392	0.853334	-0.00426186	0.960579	0.105278	0.220814	-0.26658	0.00163924	0.220254	0.00970344	0.0814191	0.344238	0.442417	6.20146e-08	0.287032	0.000672175	0.635064	7.79464e-17	0.178282	0.0371289	-0.172974	0.043246	-0.150212	0.0797687	-0.201955	0.0179521	-0.231534	0.00648286	-0.307906	0.000251957	-0.444033	5.47934e-08	-0.158843	0.0637442
CFB	blue	-0.0810393	0.3465	0.075022	0.383594	-0.0130427	0.879764	-0.0524078	0.543045	-0.0362314	0.674245	-0.0073376	0.932183	0.0583457	0.498254	0.0701985	0.414998	0.0066378	0.938638	0.156887	0.0671235	-0.0965386	0.261767	0.0996147	0.246799	0.0636325	0.460075	0.356742	1.8777e-05	-0.0780072	0.364901	0.187158	0.0285285	-0.200905	0.0185706	-0.093287	0.278251	-0.0316401	0.713592	-0.202334	0.0177334	-0.237507	0.00519678	0.0902307	0.294368
SERP1	blue	-0.176745	0.0388206	0.197938	0.0204186	0.0324426	0.706657	-0.00420707	0.961085	0.0612472	0.477097	0.100621	0.242034	0.03335	0.698843	0.0886996	0.302671	-0.0602544	0.484281	-0.184338	0.0310552	0.218636	0.0102656	-0.327211	9.508e-05	-0.228653	0.00719911	0.432436	1.31308e-07	0.177658	0.0378076	-0.0946309	0.271355	0.00492165	0.954482	0.0439731	0.609895	0.0465987	0.588701	0.12427	0.147944	-0.0727886	0.397952	0.00667267	0.938316
PHGDH	blue	-0.0341978	0.691572	0.030697	0.721773	0.108793	0.205697	0.0881333	0.30578	0.151583	0.0770264	-0.182705	0.0326036	-0.134836	0.116197	0.00851944	0.921293	0.141085	0.10008	0.0337447	0.695454	0.192073	0.0245423	0.187035	0.0286351	-0.207408	0.0150193	0.562401	8.56943e-13	0.160939	0.0602787	-0.0152527	0.859584	-0.0795934	0.355201	-0.141212	0.0997722	-0.0593596	0.490806	-0.148312	0.0836976	-0.185973	0.0295676	-0.351051	2.59983e-05
EPB41L4B	blue	-0.00677036	0.937415	0.101842	0.236336	0.0753384	0.381586	-0.0668688	0.437526	-0.0476164	0.580577	0.0640906	0.456844	-0.00574483	0.94688	-0.0109052	0.899355	-0.167312	0.0506786	0.170989	0.0457414	0.0482649	0.575428	-0.0798805	0.353462	-0.215454	0.0114556	0.712372	1.6567e-22	0.306796	0.000265955	-0.253553	0.00279356	-0.241746	0.00442749	-0.0792407	0.357344	-0.183342	0.0319917	-0.161882	0.0587713	-0.363308	1.28e-05	0.194686	0.0226239
CA4	blue	-0.0480726	0.576952	0.00225442	0.979141	0.0268801	0.755195	-0.081242	0.345292	0.0996936	0.246423	-0.0207888	0.80946	-0.0537462	0.532779	0.119991	0.162522	-0.290178	0.000582494	-0.075713	0.379217	0.149141	0.0819653	0.116943	0.17354	-0.0382583	0.657143	0.868662	5.19833e-43	0.414284	4.83737e-07	-0.130874	0.127417	0.0205429	0.811671	-0.000389558	0.996395	0.00275842	0.974479	-0.0625877	0.467489	-0.374508	6.52791e-06	-0.223182	0.00875444
ARSE	blue	-0.0616718	0.474042	0.0473825	0.582439	0.0608913	0.479666	-0.200723	0.0186797	-0.0112463	0.896224	0.0612607	0.477	-0.084763	0.324718	0.132643	0.122309	-0.262547	0.00193885	0.210664	0.0134749	0.0378503	0.660572	0.135557	0.114242	-0.00495755	0.954151	0.652398	5.79501e-18	0.186261	0.0293123	-0.112816	0.189326	-0.246064	0.00375047	-0.141565	0.0989202	-0.134444	0.117271	-0.214607	0.011792	-0.340995	4.55081e-05	0.110963	0.196748
SPCS1	blue	-0.00681216	0.937029	0.137165	0.10997	0.180643	0.0346518	-0.0198864	0.817584	0.00763461	0.929445	0.0247628	0.773937	0.0785401	0.361624	-0.142151	0.0975157	0.106532	0.215334	0.0851041	0.322768	0.317107	0.000159654	0.159829	0.0620948	-0.224272	0.00842282	0.320131	0.000136974	0.113787	0.185523	-0.0995679	0.247022	-0.0625178	0.467987	-0.0320071	0.710417	-0.110018	0.200608	-0.220344	0.00967282	-0.218766	0.0102195	-0.229833	0.00689774
RNA5SP111	blue	0.198217	0.0202383	-0.119612	0.163861	-0.125902	0.142654	-0.027738	0.74764	-0.237105	0.0052755	-0.0096005	0.911344	-0.0941694	0.27371	0.096526	0.261829	-0.52361	5.19248e-11	-0.28081	0.000887938	-0.0957678	0.265612	-0.184443	0.0309573	0.071077	0.409169	0.412496	5.47783e-07	0.313155	0.000194566	-0.129091	0.132731	0.273825	0.00120459	0.20156	0.0181824	0.0489342	0.570135	0.291703	0.000543103	-0.159475	0.0626826	0.0319318	0.711068
ITIH2	blue	0.0586522	0.495996	-0.0167112	0.846317	-0.0209712	0.80782	-0.0128617	0.88142	-0.168841	0.0485738	-0.142279	0.0972123	-0.0380127	0.659206	-0.0196213	0.819973	-0.0378351	0.660699	0.279933	0.000923002	-0.0178436	0.836044	0.133659	0.119446	0.120895	0.159357	0.214785	0.0117205	-0.0680434	0.429501	-0.187189	0.0285014	-0.25226	0.00294116	-0.208848	0.0143185	-0.21472	0.0117467	-0.258477	0.00229093	-0.295999	0.000444963	0.171914	0.0445647
DPEP1	blue	-0.0636974	0.459616	-0.00140769	0.986975	0.128471	0.134618	0.0318649	0.711646	0.0151031	0.860948	0.0935301	0.276995	-0.0449258	0.602166	-0.0216501	0.801725	-0.427744	1.85292e-07	-0.251268	0.00305905	0.0209411	0.808091	-0.133966	0.118593	-0.231798	0.00642061	0.693923	5.43542e-21	0.473868	4.95256e-09	-0.0654564	0.447288	0.14158	0.098883	0.204429	0.0165654	0.19357	0.0234273	0.215119	0.0115875	-0.0399652	0.642877	-0.0920159	0.28488
P2RX4	blue	-0.114087	0.184357	0.0739237	0.390615	0.0255567	0.766893	0.0735212	0.393207	0.0345544	0.688521	0.0566791	0.510626	0.0761064	0.376738	0.0360444	0.67583	-0.0036984	0.965788	0.270802	0.00137122	0.173007	0.0432059	0.231133	0.00657868	0.0457376	0.595614	0.386617	3.06299e-06	-0.110912	0.196952	-0.00663884	0.938628	-0.256813	0.00245073	-0.339163	5.02917e-05	-0.0974904	0.257071	-0.358405	1.70541e-05	-0.240683	0.00461022	0.074012	0.390048
RAP1GAP	blue	0.0194259	0.821736	0.101564	0.237625	-0.0178277	0.836187	-0.105594	0.219425	0.00614754	0.943162	0.130349	0.128964	-0.075653	0.379595	0.150468	0.0792508	-0.25362	0.00278616	0.241891	0.00440311	-0.0547921	0.524824	0.136857	0.110779	0.064658	0.452861	0.59974	9.63703e-15	0.269009	0.00147977	-0.183583	0.0317627	-0.280058	0.000917905	-0.135774	0.113657	-0.19906	0.0197016	-0.195761	0.0218734	-0.357772	1.76915e-05	0.0873437	0.310151
RBPJL	blue	-0.0612465	0.477102	0.0192571	0.82326	0.111982	0.192642	-0.093324	0.278059	0.0144943	0.8665	-0.00867318	0.919877	-0.0575202	0.504363	0.115303	0.179694	-0.292126	0.000532619	-0.142288	0.0971903	0.147821	0.084739	-0.000335256	0.996898	-0.0548781	0.524173	0.93644	2.82906e-63	0.390005	2.46516e-06	-0.126848	0.139653	0.0578391	0.501999	0.0272793	0.751677	0.0406365	0.637301	0.0247042	0.774458	-0.300023	0.000368151	-0.192863	0.023948
LGALS2	blue	-0.0550237	0.523071	-0.0199983	0.816575	-0.00637723	0.941042	-0.127539	0.13749	-0.0738075	0.391363	-0.0656577	0.44589	-0.113627	0.186146	0.120198	0.161792	-0.483069	2.24994e-09	-0.138048	0.107678	0.152039	0.0761303	0.0900479	0.295352	0.0912557	0.288895	0.666894	5.7696e-19	0.35512	2.06145e-05	-0.141932	0.0980385	0.218456	0.01033	0.113608	0.186219	0.0201586	0.815131	-0.0316699	0.713334	-0.434336	1.14041e-07	-0.0732257	0.395117
ROCR	blue	-7.94058e-05	0.999265	0.00690995	0.936127	0.0587553	0.495238	0.0211653	0.806076	0.130865	0.127443	0.0111998	0.896651	-0.0574694	0.50474	0.18588	0.0296509	-0.308014	0.000250635	-0.0456952	0.595956	0.185105	0.03035	0.176405	0.0392029	0.0968135	0.260404	0.860146	2.67794e-41	0.364345	1.20384e-05	-0.117855	0.170187	0.0143522	0.867797	-0.0535459	0.534309	-0.0273359	0.751178	-0.0827614	0.336315	-0.373121	7.10508e-06	-0.245844	0.00378263
HPN	blue	-0.0647345	0.452325	0.140636	0.101176	0.174644	0.0412364	-0.124525	0.147107	0.0320616	0.709946	0.0376553	0.662213	-0.0800306	0.352556	0.13749	0.109121	-0.212279	0.012762	-0.128986	0.133048	0.0757929	0.378712	0.111717	0.193702	-0.12367	0.149927	0.766412	9.96502e-28	0.474028	4.88584e-09	-0.114976	0.180938	0.0200025	0.816537	0.0225454	0.793705	0.0567712	0.509939	0.0120291	0.889046	-0.226065	0.00790145	-0.325882	0.000101897
FBXO25	blue	-0.0555569	0.519046	0.151935	0.0763351	0.0557112	0.517884	-0.0544641	0.527312	0.0981714	0.253746	0.0592468	0.491631	-0.061516	0.475162	0.0667404	0.438409	-0.230583	0.00671208	-0.168521	0.0490085	0.217465	0.01069	-0.109639	0.202176	-0.313762	0.000188782	0.5235	5.24978e-11	0.373447	6.96547e-06	-0.169806	0.047284	0.0637904	0.45896	0.0481052	0.576693	0.0359438	0.676685	0.110711	0.197769	-0.150167	0.0798595	-0.179411	0.0359259
FGL1	blue	-0.0994777	0.247453	0.0656854	0.445698	0.0769208	0.371638	-0.0843855	0.326885	0.027508	0.749664	-0.00922834	0.914767	-0.00977984	0.909694	0.117822	0.170307	-0.242002	0.00438447	-0.120165	0.161909	0.181951	0.0333397	0.0534432	0.535094	-0.0792357	0.357374	0.910058	1.73508e-53	0.38315	3.81581e-06	-0.131583	0.125349	0.0428865	0.618764	-0.00125143	0.98842	0.0300704	0.727225	-0.0121788	0.887674	-0.301515	0.000342925	-0.262653	0.00193039
PNLIP	blue	-0.0387814	0.652758	0.024796	0.773642	0.0547554	0.525102	-0.103217	0.230035	-0.054121	0.529921	0.0171265	0.842545	-0.0575214	0.504354	0.129854	0.130435	-0.24974	0.00324914	-0.125249	0.144751	0.00841272	0.922275	-0.0980949	0.254118	-0.180937	0.0343524	0.839908	1.19998e-37	0.34549	3.55163e-05	-0.043011	0.617745	0.0196905	0.819349	0.0545466	0.526686	0.0900539	0.295319	0.0730699	0.396126	-0.216335	0.0111146	-0.0892981	0.299407
MT-ATP6	blue	0.0356053	0.679562	-0.0298667	0.729001	-0.176711	0.0388583	0.0956203	0.266353	-0.0188564	0.826879	0.0608369	0.480059	-0.0214082	0.803895	-0.0589897	0.493516	0.0946983	0.271012	0.297279	0.000419066	-0.19484	0.0225151	0.210463	0.013566	0.377334	5.48577e-06	-0.538995	1.08547e-11	-0.307486	0.00025717	0.030361	0.724694	-0.140969	0.100362	-0.188809	0.0271319	-0.195038	0.0223763	-0.21685	0.0109194	-0.0603487	0.483596	0.254015	0.00274254
CELP	blue	-0.067267	0.434796	0.0670153	0.436521	0.11847	0.167951	-0.0722758	0.401294	0.0495968	0.564919	0.0355109	0.680365	0.0010341	0.990431	0.136528	0.111648	-0.232865	0.006174	-0.154107	0.0721752	0.178764	0.0366113	-0.00860627	0.920493	-0.148493	0.0833169	0.867897	7.48986e-43	0.375319	6.21104e-06	-0.110549	0.198431	0.0707724	0.411185	0.0600466	0.485792	0.0644422	0.454374	0.019668	0.819553	-0.246837	0.00363958	-0.212193	0.0127992
GTF2IP4	blue	-0.0239845	0.780859	0.0383019	0.656776	-0.176519	0.0390739	-0.0884176	0.304217	0.016311	0.849953	0.033463	0.697872	-0.152353	0.0755191	0.0750184	0.383617	-0.278683	0.000975176	-0.136102	0.11278	-0.264857	0.00176169	-0.35937	1.61231e-05	-0.196603	0.0213004	0.496906	6.56857e-10	0.332025	7.37995e-05	-0.0598271	0.487391	-0.0663547	0.441065	0.035932	0.676785	0.1541	0.0721896	0.258147	0.00232186	-0.0705951	0.41236	0.172261	0.0441292
SLC37A4	blue	-0.0307166	0.721602	0.0883577	0.304546	0.01742	0.839883	-0.0302519	0.725644	0.0799512	0.353035	-0.049389	0.566552	-0.134706	0.116553	0.07612	0.376652	-0.320184	0.000136604	0.0952309	0.268314	0.0551976	0.521756	0.0977856	0.255626	0.151682	0.0768303	0.592132	2.52072e-14	0.465764	9.73488e-09	-0.130308	0.129085	-0.146269	0.0880954	-0.144036	0.0931101	-0.17305	0.0431533	-0.142065	0.0977211	-0.443672	5.6333e-08	0.00991507	0.908451
FAM3B	blue	0.0234004	0.786066	0.00872445	0.919405	0.0168966	0.844632	-0.0569597	0.508532	-0.123458	0.150633	0.0303574	0.724726	0.00560656	0.948156	0.0898187	0.296588	-0.289544	0.000599619	0.220192	0.00972435	0.0730677	0.396141	0.288467	0.000629778	0.11112	0.196109	0.596711	1.41747e-14	0.134359	0.117507	-0.103983	0.226577	-0.118191	0.168963	-0.0621109	0.470894	-0.170255	0.0466933	-0.296869	0.000427211	-0.424384	2.36377e-07	0.0191955	0.823817
AADAC	blue	-0.0270198	0.753963	0.153603	0.0731235	0.0711534	0.408665	-0.0436631	0.612419	-0.00874754	0.919192	0.147085	0.0863179	0.0527804	0.540177	0.148183	0.0839702	-0.136291	0.112275	0.247785	0.0035077	0.0317819	0.712365	0.0730922	0.395982	-0.024707	0.774433	0.321972	0.000124677	-0.0592755	0.491421	-0.0732998	0.394638	-0.20536	0.0160677	-0.0733071	0.39459	-0.141362	0.0994093	-0.270635	0.00138106	-0.300485	0.000360159	0.29538	0.000458018
MAP6D1	blue	-0.0992201	0.248685	0.0591559	0.492297	0.0689559	0.423325	-0.104773	0.223048	0.196141	0.0216131	-0.0445628	0.605106	0.000388044	0.996409	0.0513868	0.550941	0.00435175	0.959748	-0.13303	0.121213	0.332317	7.26629e-05	0.13908	0.105047	-0.222357	0.00901329	0.365048	1.15472e-05	0.360072	1.54764e-05	-0.118997	0.166056	0.0977079	0.256005	-0.0253942	0.768333	-2.46271e-05	0.999772	-0.0014775	0.986329	-0.0993672	0.247981	-0.468321	7.88009e-09
TMED6	blue	-0.0778842	0.365659	0.0937548	0.275837	0.150805	0.0785732	-0.0991265	0.249134	0.0538657	0.531867	0.0215466	0.802653	-0.0461873	0.591999	0.092166	0.284092	-0.361312	1.4394e-05	-0.164732	0.054401	0.219619	0.00992058	-0.0154112	0.858141	-0.0953145	0.267892	0.856119	1.57929e-40	0.610237	2.45107e-15	-0.21119	0.013239	0.0781696	0.3639	0.0204087	0.812879	-0.0178374	0.8361	0.0588862	0.494276	-0.338248	5.28536e-05	-0.231549	0.00647943
ATP5F1A	blue	0.037098	0.666911	-0.0571399	0.50719	0.0137547	0.873254	-0.247655	0.00352547	-0.0400279	0.642356	-0.0123393	0.886204	-0.0591766	0.492146	0.0974486	0.257275	-0.459249	1.65506e-08	-0.574468	2.13773e-13	0.209223	0.0141406	-0.142668	0.0962905	-0.247171	0.00359262	0.55276	2.49754e-12	0.609762	2.61087e-15	-0.16771	0.0501243	0.509284	2.08191e-10	0.341005	4.54826e-05	0.297655	0.000411713	0.404866	9.23883e-07	-0.102744	0.23219	-0.436719	9.54473e-08
DYM	blue	-0.0786259	0.361098	0.147835	0.0847095	0.0563089	0.513396	-0.159937	0.0619159	0.0103174	0.904754	0.118128	0.169192	0.0029126	0.973054	0.108309	0.207737	-0.282247	0.000833109	-0.461834	1.34261e-08	0.178918	0.0364466	-0.309439	0.000233751	-0.44184	6.4803e-08	0.621834	5.0862e-16	0.416649	4.09907e-07	-0.190643	0.0256495	0.231294	0.00653997	0.230205	0.006805	0.289347	0.000605032	0.434825	1.09965e-07	0.164909	0.0541386	-0.325765	0.000102519
AC131097.2	blue	-0.088916	0.301488	0.0817504	0.342271	0.158091	0.0650264	-0.128794	0.133631	-0.0186724	0.828542	0.0116024	0.892957	-0.0292838	0.73409	0.111551	0.194368	-0.235609	0.00557825	-0.143844	0.0935501	0.235189	0.00566606	0.0192441	0.823378	-0.185801	0.0297212	0.89522	3.11918e-49	0.377032	5.58905e-06	-0.157011	0.0669058	0.0646191	0.453133	0.0252876	0.769279	0.0478863	0.578431	0.0148045	0.863671	-0.250547	0.00314746	-0.264748	0.00176969
AC055720.2	blue	0.0173077	0.840902	-0.0185816	0.829364	0.0350745	0.684081	-0.111892	0.193	0.0109997	0.898487	0.0319892	0.710571	-0.0383093	0.656715	0.16189	0.0587581	-0.330283	8.09253e-05	-0.412912	5.32197e-07	0.172135	0.0442863	-0.0910636	0.289916	-0.148792	0.0826904	0.440364	7.25024e-08	0.335398	6.16405e-05	-0.0428303	0.619224	0.358756	1.671e-05	0.246762	0.00365022	0.274798	0.00115506	0.295966	0.000445655	0.0075886	0.929869	-0.34298	4.08088e-05
CDNF	blue	-0.0811291	0.345965	0.137202	0.109873	0.233828	0.00595886	-0.154394	0.0716401	0.00406274	0.962419	0.00133776	0.987622	-0.00887411	0.918027	0.0566036	0.511191	-0.329282	8.53079e-05	-0.0657684	0.445122	0.351322	2.56017e-05	-0.0403197	0.63993	0.0600149	0.486023	0.464196	1.10725e-08	0.403917	9.85045e-07	-0.211081	0.0132875	0.0690423	0.422742	0.0132527	0.877843	-0.138614	0.10623	-0.0264309	0.759159	-0.416902	4.02686e-07	-0.019649	0.819724
SRPRB	blue	-0.108131	0.208488	0.124171	0.14827	0.132405	0.122987	-0.0175084	0.839081	0.0860162	0.31759	-0.0025881	0.976055	-0.0304875	0.723594	0.0419612	0.626359	0.0984605	0.252344	-0.130108	0.129679	0.355211	2.0507e-05	-0.00806105	0.925515	-0.337078	5.63075e-05	0.428924	1.7001e-07	0.297672	0.000411385	-0.184207	0.0311774	0.00877831	0.918909	0.0355634	0.679918	-0.00369764	0.965794	0.0283864	0.741947	-0.052894	0.539304	-0.396828	1.58018e-06
MT-CO3	blue	0.109396	0.203183	-0.0451925	0.60001	-0.150321	0.0795473	0.0556881	0.518058	-0.0357901	0.67799	-0.119265	0.165097	-0.0337343	0.695543	-0.0483761	0.574546	0.169578	0.0475866	0.22381	0.00856195	-0.0420483	0.625643	0.220295	0.00968926	0.256923	0.00243992	-0.552603	2.54075e-12	-0.321118	0.000130248	0.0665964	0.4394	-0.0431501	0.616607	-0.13826	0.107134	-0.185875	0.0296549	-0.183032	0.0322884	-0.0324044	0.706986	0.089151	0.300207
AMY2A	blue	-0.0158563	0.854088	0.0342107	0.691461	0.0254539	0.767804	-0.130563	0.128331	-0.0683501	0.427419	-0.00337819	0.968748	-0.0176226	0.838046	0.115358	0.179486	-0.210724	0.013448	-0.117225	0.172497	0.0078041	0.927883	-0.0967656	0.260641	-0.18482	0.0306103	0.815336	7.64628e-34	0.322527	0.000121178	-0.037942	0.6598	0.0147721	0.863966	0.0375377	0.663203	0.0855338	0.320322	0.058019	0.500667	-0.215905	0.0112798	-0.083481	0.332116
MKNK1	blue	-0.0130529	0.879671	-0.137025	0.110338	0.0952941	0.267995	-0.101479	0.238021	0.0838724	0.329846	0.0348536	0.685965	0.0830205	0.334799	0.143968	0.0932653	-0.323864	0.000113119	-0.382944	3.86566e-06	0.0867305	0.313573	0.165456	0.0533338	0.194204	0.0229678	0.535035	1.63634e-11	0.288613	0.000625607	-0.0476801	0.58007	0.384104	3.59288e-06	0.188828	0.0271163	0.32537	0.000104641	0.180366	0.0349343	-0.040027	0.642363	-0.479767	2.99453e-09
GKAP1	blue	-0.0137441	0.873351	-0.00383731	0.964503	-0.0655611	0.446561	-0.0445198	0.605454	-0.128089	0.135788	0.0571263	0.507291	-0.0747174	0.385534	0.0965046	0.261935	-0.503609	3.54582e-10	-0.266146	0.00166935	0.241825	0.00441427	-0.040072	0.641989	-0.0385661	0.654561	0.689093	1.29836e-20	0.565867	5.78408e-13	-0.263816	0.0018396	0.230553	0.00671929	0.0522792	0.544036	-0.0178495	0.83599	0.131053	0.126893	-0.408216	7.35617e-07	-0.238568	0.00499376
CRISP3	blue	0.00472909	0.956261	0.015774	0.854837	-0.0286199	0.7399	-0.0437392	0.6118	-0.0568924	0.509034	0.0369312	0.66832	0.00185992	0.982791	0.0187046	0.828252	-0.373069	7.12769e-06	-0.00984421	0.909103	-0.0402712	0.640333	-0.055535	0.519211	0.105712	0.218906	0.343657	3.93123e-05	0.260599	0.00210072	-0.155431	0.0697319	-0.000953668	0.991175	0.000984477	0.99089	-0.0961291	0.263805	0.0440359	0.609385	-0.293385	0.000502529	0.125496	0.143956
MT-CYB	blue	0.0994626	0.247525	-0.121257	0.1581	-0.192459	0.0242504	0.040564	0.637903	-0.0991218	0.249156	-0.0484649	0.573844	-0.035588	0.679709	-0.00358407	0.966844	-0.129939	0.130182	0.190638	0.0256534	-0.168247	0.0493833	0.199629	0.0193468	0.458105	1.81471e-08	-0.364896	1.16519e-05	-0.194465	0.022781	-0.115984	0.177117	-0.0242662	0.778352	-0.144823	0.0913159	-0.206378	0.015539	-0.086736	0.313542	-0.102279	0.234321	0.191877	0.0246913
CBFA2T3	blue	-0.054992	0.523311	-0.186649	0.0289706	0.0838251	0.33012	-0.0513833	0.550969	-0.0269295	0.754759	0.0158704	0.853961	-0.0601404	0.48511	0.0514225	0.550664	-0.501425	4.34106e-10	-0.592505	2.40617e-14	0.322789	0.000119556	0.0687765	0.424535	-0.00777374	0.928163	0.487126	1.57706e-09	0.478208	3.42347e-09	-0.159823	0.0621036	0.71722	6.32319e-23	0.484279	2.02468e-09	0.234511	0.00581029	0.284835	0.000742132	-0.159019	0.0634474	-0.522391	5.85885e-11
AC007207.2	blue	-0.0839437	0.329433	0.0777393	0.366555	0.109242	0.203821	-0.129139	0.132586	0.039921	0.643245	0.00108367	0.989973	-0.0305451	0.723093	0.154128	0.0721376	-0.253826	0.00276329	-0.131066	0.126853	0.132848	0.121726	-0.00180364	0.983311	-0.0908433	0.291089	0.920167	7.83602e-57	0.371562	7.81183e-06	-0.0317504	0.712637	0.0379699	0.659566	0.00773771	0.928495	0.0601027	0.485384	0.0160015	0.852767	-0.29248	0.000523998	-0.196779	0.0211821
AC010547.2	blue	-0.0585813	0.496518	-0.0399143	0.643301	-0.0616921	0.473896	-0.0527571	0.540356	-0.0473664	0.582567	-0.0488096	0.571118	-0.076271	0.375703	0.0138558	0.87233	-0.255635	0.00257004	0.168736	0.0487165	-0.0945448	0.271793	0.0686275	0.425542	0.113734	0.185729	0.476269	4.0401e-09	0.102153	0.234902	-0.0855222	0.320387	-0.168266	0.0493573	-0.123057	0.151971	-0.0989973	0.249754	-0.114902	0.181223	-0.307108	0.000261948	0.146348	0.0879209
CRAT	blue	-0.0123039	0.886527	-0.0576234	0.503597	0.0573099	0.505925	0.0282454	0.743184	0.0472788	0.583266	0.0281898	0.743672	-0.0444097	0.606348	0.142549	0.096572	-0.247528	0.00354307	0.0402153	0.640797	-0.0744863	0.387009	0.182931	0.0323848	-0.0492552	0.567606	0.606049	4.25847e-15	0.219289	0.0100352	-0.251908	0.00298256	-0.0735752	0.392859	-0.0569866	0.508332	-0.0331519	0.700546	-0.0289014	0.737435	-0.104746	0.223172	-0.157051	0.0668357
LINC02532	blue	0.00672237	0.937857	0.00904326	0.91647	-0.030137	0.726645	-0.0316575	0.713442	-0.0274399	0.750262	-0.0278905	0.7463	-0.0844821	0.32633	0.14884	0.0825918	-0.406097	8.49918e-07	-0.000646881	0.994014	0.0482642	0.575433	0.0376476	0.662277	0.143223	0.0949903	0.724314	1.4888e-23	0.354447	2.14263e-05	-0.112325	0.191273	-0.0179472	0.835105	-0.0177178	0.837184	-0.0708871	0.410425	-0.0629922	0.464611	-0.459368	1.63924e-08	0.0417097	0.628431
PWWP3B	blue	-0.0361867	0.674623	-0.0372604	0.665541	-0.142845	0.0958747	-0.00471757	0.956368	-0.0330489	0.701432	-0.024835	0.773295	-0.112208	0.19174	0.142885	0.0957821	-0.358569	1.68924e-05	-0.347625	3.15287e-05	-0.144316	0.0924674	-0.208575	0.0144491	-0.192417	0.0242816	0.606397	4.06858e-15	0.397149	1.54714e-06	-0.094816	0.270414	0.114883	0.181296	0.113669	0.185981	0.261056	0.00206169	0.415656	4.39497e-07	0.140927	0.100465	-0.267424	0.00158212
ABCA5	blue	0.0406684	0.637038	-0.115971	0.177167	-0.120014	0.162441	-0.0455415	0.597194	-0.0878984	0.307076	-0.0514806	0.550213	-0.0288686	0.737721	-0.014525	0.86622	-0.51018	1.91234e-10	-0.144893	0.0911591	0.00941627	0.913038	-0.0741049	0.389452	0.380223	4.58479e-06	0.447356	4.23999e-08	0.456277	2.1008e-08	-0.221371	0.00933101	0.137419	0.109307	0.0687972	0.424395	-0.05835	0.498223	0.09447	0.272174	-0.400338	1.25222e-06	0.0697256	0.418156
SEC11C	blue	-0.022399	0.795015	-0.00523019	0.951632	0.0936803	0.27622	-0.157225	0.0665298	-0.0585128	0.497023	-0.0441107	0.608777	-0.0647469	0.452238	-0.0202235	0.814546	-0.45846	1.7637e-08	-0.474216	4.80909e-09	0.280166	0.000913571	-0.0863882	0.315494	-0.242244	0.00434426	0.634192	8.845e-17	0.761535	3.35575e-27	-0.165573	0.0531632	0.422056	2.79372e-07	0.366606	1.05252e-05	0.193417	0.0235386	0.256431	0.00248886	-0.25827	0.00231023	-0.425806	2.13296e-07
TCEA3	blue	0.0450711	0.600991	0.0554533	0.519827	0.0578132	0.50219	0.011921	0.890037	-0.0047512	0.956057	0.154197	0.0720078	0.0132201	0.878141	0.146988	0.0865262	-0.274146	0.00118803	0.293007	0.000511388	0.152771	0.0747106	0.241183	0.00452337	0.0513129	0.551515	0.687909	1.60338e-20	0.114122	0.184221	-0.135386	0.114702	-0.239155	0.00488449	-0.184701	0.0307192	-0.266801	0.00162411	-0.31441	0.000182777	-0.447355	4.24028e-08	0.0793	0.356983
GATM	blue	0.00721077	0.933352	-0.00352569	0.967384	0.0576647	0.503291	-0.0878371	0.307415	0.00243117	0.977506	0.0319242	0.711134	-0.0229434	0.790147	0.185472	0.0300171	-0.337565	5.48451e-05	-0.0354986	0.680469	0.00589071	0.945533	-0.106973	0.213431	-0.0468311	0.586841	0.873811	4.18335e-44	0.361331	1.4378e-05	-0.0612379	0.477164	-0.0496584	0.564435	0.0500445	0.561407	-0.014863	0.863137	-0.0301552	0.726486	-0.384172	3.57739e-06	0.108181	0.208276
EIF4EBP1	blue	-0.149769	0.0806709	0.107246	0.212257	0.210288	0.0136458	0.049309	0.567181	0.133182	0.120785	0.0108007	0.900315	0.0271251	0.753035	0.0798346	0.35374	0.261922	0.00198952	0.0974387	0.257324	0.368411	9.4474e-06	0.352319	2.41929e-05	-0.118208	0.1689	0.480459	2.82111e-09	0.0714052	0.407004	-0.0344632	0.689301	-0.104672	0.223499	-0.207583	0.0149326	-0.0687142	0.424955	-0.29639	0.000436905	-0.200242	0.0189702	-0.439916	7.50073e-08
ZNF33B	blue	-0.103476	0.228862	0.118573	0.167582	0.109986	0.200742	0.0762258	0.375987	0.0162311	0.850679	-0.0671731	0.435439	-0.110664	0.197964	0.0129481	0.88063	-0.168232	0.0494035	0.278044	0.00100288	0.22479	0.00826918	-0.0183209	0.831722	0.172871	0.0433726	0.510686	1.82254e-10	0.0658193	0.444768	-0.129596	0.131208	-0.253964	0.00274811	-0.212149	0.0128181	-0.327905	9.16934e-05	-0.28837	0.000632586	-0.513086	1.44923e-10	0.332818	7.07547e-05
MCCC1	blue	-0.0871005	0.311505	0.046283	0.591231	0.132493	0.122736	-0.0190924	0.824747	0.0352412	0.682661	0.0430667	0.617289	-0.0159711	0.853044	0.158261	0.0647354	-0.249655	0.00325998	-0.135073	0.11555	0.293062	0.000510083	0.044391	0.606499	0.0700169	0.416209	0.656104	3.25211e-18	0.352894	2.34141e-05	-0.131482	0.125643	0.144052	0.0930729	0.0931824	0.278792	-0.0459074	0.594248	-0.0455101	0.597448	-0.423599	2.50106e-07	-0.217594	0.0106427
LINC00339	blue	-0.113557	0.186416	-0.0174772	0.839364	0.0690037	0.423003	-0.123941	0.14903	-0.0628969	0.465288	0.0252424	0.769679	-0.0835416	0.331764	0.0543019	0.528545	-0.369603	8.79401e-06	-0.449283	3.64924e-08	0.233397	0.00605439	-0.00863742	0.920206	-0.177824	0.0376265	0.667394	5.31615e-19	0.553418	2.3243e-12	-0.10393	0.226816	0.440011	7.44672e-08	0.28928	0.000606901	0.245387	0.00385004	0.243599	0.00412457	-0.125159	0.145043	-0.503351	3.63195e-10
GPT2	blue	-0.074349	0.387888	0.134316	0.117625	0.185135	0.0303225	-0.101541	0.237733	-0.0690607	0.422619	0.00984002	0.909141	-0.00905312	0.91638	0.0489921	0.569678	0.0497851	0.56344	0.297784	0.000409233	0.101025	0.240138	0.123082	0.15189	-0.0844965	0.326247	0.588266	4.06953e-14	0.0424279	0.622523	-0.145098	0.090696	-0.318559	0.000148359	-0.263219	0.00188575	-0.288287	0.000634956	-0.330339	8.06888e-05	-0.373145	7.09493e-06	0.125998	0.142347
MT1X	blue	-0.0888304	0.301956	0.0531053	0.537682	0.0683602	0.427351	-0.118414	0.168156	0.0510966	0.553196	0.0208268	0.809118	-0.00478312	0.955762	0.142876	0.0958026	-0.165096	0.0538625	-0.381384	4.26354e-06	0.221351	0.00933767	-0.00323079	0.970111	-0.118722	0.167046	0.406322	8.36995e-07	0.480436	2.82655e-09	-0.118751	0.16694	0.315405	0.00017391	0.21931	0.010028	0.163906	0.0556378	0.229162	0.00706762	-0.052669	0.541033	-0.491958	1.02662e-09
IFRD1	blue	-0.00992581	0.908352	0.10754	0.210999	0.00372701	0.965523	0.0437092	0.612044	-0.0150518	0.861415	0.0633951	0.461754	0.150065	0.080068	0.13592	0.113265	0.0313746	0.715891	0.140882	0.100574	0.165054	0.0539246	0.17998	0.0353321	0.266207	0.00166505	0.383692	3.68757e-06	-0.0014881	0.986231	-0.144198	0.092738	-0.163108	0.0568565	-0.222804	0.00887212	-0.180089	0.0352195	-0.204275	0.0166485	-0.235954	0.00550707	-0.0824167	0.338338
WDFY2	blue	-0.154562	0.0713291	0.0942298	0.273401	0.136485	0.111761	-0.0389345	0.651476	0.0973525	0.257747	-0.0529161	0.539134	-0.0301836	0.726239	0.067017	0.436509	-0.071874	0.403923	-0.239938	0.00474224	0.192884	0.0239324	-0.0407713	0.636185	0.0457316	0.595663	0.395718	1.69997e-06	0.345173	3.61476e-05	-0.0867727	0.313337	0.164593	0.0546072	0.0260166	0.762822	0.0770856	0.370611	0.0665841	0.439484	-0.190377	0.0258598	-0.288221	0.000636859
PSMD6	blue	-0.130551	0.128365	0.0656792	0.445741	0.204096	0.0167462	-0.0648505	0.451514	-0.00994982	0.908132	0.0358098	0.677823	0.071747	0.404756	0.0384273	0.655725	-0.0262156	0.761062	-0.0435162	0.613617	0.329951	8.23551e-05	0.131604	0.12529	-0.0101828	0.905991	0.583301	7.45916e-14	0.244989	0.0039098	-0.113356	0.187206	0.0266664	0.75708	-0.0788028	0.360015	-0.0574316	0.505021	-0.101629	0.237324	-0.260753	0.00208751	-0.334935	6.31887e-05
PLIN5	blue	-0.0416254	0.629125	-0.0105295	0.902805	0.071736	0.404829	-0.0175282	0.838902	0.0673982	0.433899	-0.0473436	0.582749	0.00329647	0.969504	0.107466	0.211318	-0.223183	0.00875407	0.0629613	0.46483	0.261262	0.00204432	0.325826	0.000102194	0.196216	0.021562	0.806346	1.36814e-32	0.248159	0.00345678	-0.219356	0.0100119	-0.0609186	0.479468	-0.135809	0.113562	-0.16057	0.0608777	-0.195255	0.022224	-0.409875	6.56507e-07	-0.311709	0.000209029
MUC6	blue	0.110582	0.198297	-0.00214915	0.980115	-0.0161336	0.851566	-0.0205379	0.811716	-0.126442	0.140933	0.108876	0.20535	0.00561627	0.948067	0.16247	0.0578456	-0.423148	2.5834e-07	0.0726392	0.398924	-0.0191315	0.824394	0.1312	0.126463	0.261567	0.00201882	0.534158	1.79075e-11	0.220479	0.00962738	-0.188062	0.0277562	-0.0696603	0.418593	-0.04015	0.64134	-0.146396	0.0878162	-0.000402488	0.996276	-0.255377	0.00259678	-0.0185136	0.829978
AC064807.1	blue	-0.146512	0.0875627	0.111505	0.194555	0.202934	0.0173915	0.0374756	0.663726	0.251148	0.00307363	0.000949437	0.991215	0.0508918	0.55479	0.131226	0.126387	0.109234	0.203854	-0.146625	0.0873164	0.271208	0.00134772	-0.0585412	0.496813	-0.0830561	0.334591	0.329625	8.37804e-05	0.17929	0.0360536	0.0567414	0.510161	0.0606545	0.481379	-0.0465127	0.589389	0.0660741	0.443004	-0.0592628	0.491514	-0.175059	0.0407499	-0.155902	0.0688791
FTL	blue	0.0451716	0.600179	-0.0152538	0.859575	0.0296455	0.730931	0.00554863	0.948691	0.0478549	0.578681	0.0299965	0.727869	0.145729	0.0892875	0.00758532	0.929899	0.150936	0.0783107	-0.319697	0.000140038	-0.147656	0.0850905	-0.299817	0.000371769	-0.368475	9.41136e-06	-0.520822	6.83869e-11	-0.132178	0.123635	0.280562	0.000897708	0.186922	0.0287326	0.273736	0.00120922	0.565412	6.09219e-13	0.352413	2.40641e-05	0.555571	1.835e-12	-0.0428248	0.619269
PM20D1	blue	-0.0730924	0.39598	0.00308662	0.971444	0.136551	0.111586	-0.0753549	0.381482	0.0273941	0.750666	0.0649211	0.45102	0.0113388	0.895375	0.0860944	0.317149	-0.297337	0.000417917	-0.152788	0.0746788	0.18469	0.0307297	-0.0521644	0.544922	-0.0951973	0.268484	0.781613	1.85628e-29	0.394154	1.88333e-06	-0.130278	0.129174	0.086178	0.316677	0.00446854	0.958669	0.0249675	0.772119	0.039372	0.64782	-0.278332	0.0009903	-0.139768	0.103322
ACTG1	blue	-0.0346994	0.687282	0.00317367	0.970639	-0.134324	0.117603	0.161181	0.0598883	0.057081	0.507628	-0.0408808	0.635278	0.0117028	0.892037	-0.0350987	0.683875	0.412089	5.63481e-07	0.303738	0.000308312	-0.216564	0.0110272	0.0480509	0.577125	0.0615974	0.474577	-0.636164	6.64169e-17	-0.398629	1.40283e-06	0.02597	0.763234	-0.263696	0.00184882	-0.222969	0.00882079	-0.160525	0.0609508	-0.084584	0.325745	0.312793	0.000198102	0.178834	0.0365363
NADK2	blue	-0.022469	0.794389	0.104921	0.222395	0.0792132	0.357511	-0.083576	0.331564	0.00301405	0.972115	0.129641	0.131073	0.0257854	0.764868	0.110741	0.197649	-0.123953	0.148988	-0.314639	0.000180696	0.0184277	0.830755	-0.344072	3.84205e-05	-0.308676	0.000242657	0.45026	3.38079e-08	0.189802	0.0263206	0.0493258	0.56705	0.0481646	0.576222	0.0668031	0.437978	0.251237	0.0030629	0.334537	6.45518e-05	0.208247	0.0146076	-0.1171	0.172961
GGT1	blue	-0.004337	0.959885	-0.0430542	0.617391	-0.0837497	0.330556	-0.0257206	0.765442	-0.0406197	0.637441	-0.0939278	0.274948	-0.121542	0.157119	0.104997	0.222056	-0.320619	0.000133612	0.0298563	0.729091	-0.165492	0.0532817	0.145269	0.0903136	0.00726295	0.932871	0.552	2.71347e-12	0.212015	0.0128762	-0.148678	0.0829291	-0.0211415	0.80629	0.0794196	0.356256	-0.0404558	0.638801	-0.0218605	0.799838	-0.202184	0.0178196	-0.0510486	0.553569
ERVE-1	blue	-0.0690107	0.422956	0.0745812	0.386403	0.0942645	0.273223	-0.105356	0.22047	-0.0314866	0.714921	0.0881741	0.305556	0.0421279	0.624988	0.185366	0.030113	-0.230601	0.00670755	-0.0683587	0.427361	0.034957	0.685083	-0.178249	0.0371639	-0.0969828	0.259568	0.808412	7.14629e-33	0.311024	0.00021622	-0.0571411	0.507181	-0.0533132	0.536089	0.0415411	0.629821	-0.00649876	0.93992	0.0192382	0.82343	-0.274516	0.00116922	0.0732461	0.394985
COQ10B	blue	0.108579	0.206597	0.0576139	0.503668	-0.149071	0.0821098	0.0419201	0.626697	-0.0303143	0.725101	0.0900133	0.295538	0.0920173	0.284873	-0.0474608	0.581815	0.260552	0.00210477	0.182338	0.03296	-0.169578	0.0475865	-0.290164	0.000582865	-0.1557	0.0692452	-0.378645	5.05803e-06	-0.183813	0.0315459	0.0500761	0.561159	-0.280949	0.0008825	-0.16638	0.051998	-0.0950746	0.269104	-0.0077005	0.928838	0.098321	0.25302	0.365731	1.10878e-05
LYRM9	blue	-0.0404861	0.638549	-0.0236741	0.783626	0.197589	0.020646	-0.0645219	0.453815	0.1066	0.215039	-0.0553199	0.520833	-0.113949	0.184893	-0.0430531	0.6174	-0.316593	0.000163841	-0.234761	0.00575663	0.282913	0.000808749	0.281573	0.000858414	-0.154368	0.0716892	0.42562	2.16185e-07	0.323331	0.000116269	-0.0360424	0.675848	0.319954	0.000138219	0.123448	0.150664	0.151579	0.0770332	0.0375923	0.662743	-0.107665	0.210467	-0.531836	2.27089e-11
TTYH1	blue	-0.0158255	0.854369	-0.0324354	0.706719	0.0080264	0.925834	-0.0465911	0.588761	0.0113428	0.895339	-0.0682321	0.428219	-0.0997229	0.246283	0.011845	0.890734	-0.248138	0.00345964	0.0177127	0.83723	0.194455	0.0227881	0.247232	0.00358409	-0.00539906	0.950072	0.815324	7.67713e-34	0.327408	9.4108e-05	-0.18248	0.0328219	-0.0353235	0.681959	-0.120068	0.162248	-0.0746904	0.385706	-0.132209	0.123547	-0.355469	2.02059e-05	-0.302879	0.000321286
NPHS1	blue	-0.137594	0.108853	0.0374801	0.663689	0.16452	0.0547164	-0.135084	0.115523	-0.0296503	0.730888	-0.035152	0.683421	-0.0188731	0.826729	0.10225	0.234457	-0.391476	2.24175e-06	-0.404588	9.41386e-07	0.237403	0.00521697	-0.0148926	0.862867	-0.0796461	0.354881	0.754064	2.0404e-26	0.613762	1.53023e-15	-0.161888	0.0587617	0.383958	3.62613e-06	0.275423	0.00112422	0.179804	0.0355151	0.182971	0.0323464	-0.24642	0.00369901	-0.375433	6.16762e-06
ANPEP	blue	0.028337	0.74238	0.114617	0.182313	-0.0742358	0.388612	-0.058106	0.500024	-0.0191627	0.824112	0.00877028	0.918983	-0.0352222	0.682822	0.150218	0.0797558	-0.251301	0.00305506	-0.128609	0.134193	-0.044939	0.602059	-0.118637	0.167349	-0.125549	0.143785	0.6613	1.4268e-18	0.335345	6.18162e-05	-0.101402	0.23838	0.0289786	0.736759	0.0642099	0.456005	0.0600303	0.485911	0.0530242	0.538305	-0.24467	0.00395818	0.00681898	0.936966
COCH	blue	-0.0629885	0.464637	-0.0283353	0.742395	0.124064	0.148624	-0.136861	0.110767	0.0859635	0.317888	0.116104	0.176668	0.101789	0.236585	0.114334	0.183401	-0.0339748	0.693482	-0.0799817	0.352851	0.205133	0.0161878	-0.0715515	0.406041	-0.0694924	0.419717	0.362297	1.35853e-05	0.123856	0.149309	-0.0488336	0.570929	0.0703031	0.414302	0.0549815	0.52339	-0.0137105	0.873658	-0.0464799	0.589652	-0.207966	0.0147442	-0.0195345	0.820757
ELF4	blue	0.0382704	0.657041	0.116661	0.174587	-0.153325	0.0736513	0.117095	0.172979	0.0782546	0.363377	0.145618	0.0895333	0.0720857	0.402536	0.0565969	0.511241	0.312561	0.000200394	0.250653	0.00313437	-0.221677	0.00923147	-0.228398	0.00726572	-0.0012884	0.988078	-0.462419	1.28017e-08	-0.367329	1.00802e-05	0.141052	0.10016	-0.231925	0.00639089	-0.0547606	0.525063	-0.103156	0.230315	-0.132743	0.122024	0.0935248	0.277022	0.548625	3.91085e-12
PDK2	blue	-0.015461	0.857687	0.0529567	0.538823	0.0646313	0.453048	-0.0985746	0.251792	0.0251541	0.770463	0.111125	0.196088	0.0128931	0.881133	0.12886	0.133429	-0.254246	0.00271725	0.116064	0.176817	0.0726571	0.398808	0.0152109	0.859966	-0.140152	0.102369	0.445829	4.77186e-08	0.143734	0.093805	-0.17035	0.0465691	-0.133847	0.118923	-0.0844942	0.32626	-0.0632421	0.462838	-0.0579865	0.500908	-0.161711	0.0590414	0.101261	0.239036
NEURL3	blue	-0.0267666	0.756196	-0.0113178	0.895568	-0.00400639	0.96294	-0.00990363	0.908556	0.0964612	0.262151	-0.00563106	0.94793	-0.108656	0.206275	0.143651	0.0939962	-0.23519	0.00566568	0.00695559	0.935706	0.0141317	0.86981	0.190571	0.0257061	-0.04001	0.642505	0.762839	2.43235e-27	0.316232	0.000166839	0.0584741	0.497308	-0.0312736	0.716767	-0.0246116	0.775281	0.019168	0.824064	-0.112068	0.192295	-0.32147	0.000127927	-0.196946	0.0210711
FKBP11	blue	-0.0544922	0.527099	0.0103684	0.904285	0.235491	0.00560274	-0.03225	0.708319	-0.0316919	0.713143	-0.024863	0.773047	-0.00734656	0.9321	0.0298928	0.728773	-0.294238	0.000483021	-0.243071	0.00420901	0.416512	4.13897e-07	0.2699	0.00142487	0.0105472	0.902642	0.659995	1.75752e-18	0.353955	2.2038e-05	-0.174162	0.0418092	0.304842	0.000292336	0.225449	0.00807705	0.0721988	0.401796	-0.0298323	0.729301	-0.273211	0.00123688	-0.490007	1.2219e-09
LMO3	blue	0.0219861	0.798713	0.0140642	0.870426	0.12438	0.147584	-0.0758117	0.378594	-0.0451998	0.599952	0.0548651	0.524271	0.0433461	0.615006	0.0839024	0.329672	-0.558572	1.316e-12	-0.520259	7.22753e-11	0.159144	0.0632371	-0.287355	0.000662414	-0.255755	0.00255757	0.614147	1.45298e-15	0.575599	1.87129e-13	-0.185222	0.0302433	0.389378	2.56674e-06	0.311751	0.00020859	0.305521	0.000282905	0.46628	9.33014e-09	-0.0265939	0.75772	-0.259895	0.00216217
FGGY	blue	-0.109926	0.200989	0.0927036	0.28128	0.0850183	0.323258	0.0320779	0.709806	0.099699	0.246397	0.0462916	0.591162	-0.0204835	0.812205	0.100126	0.244368	-0.0518669	0.547222	0.0853572	0.321326	0.123535	0.150377	0.0856186	0.319841	-0.292664	0.000519559	0.540845	8.94417e-12	0.265359	0.00172517	-0.166517	0.0518028	-0.151987	0.0762333	-0.152179	0.075857	-0.106627	0.214923	-0.100216	0.243942	-0.207421	0.0150131	-0.211506	0.013099
AMBP	blue	-0.0178756	0.835753	0.0138972	0.871952	-0.00610704	0.943536	-0.0266512	0.757214	-0.0124182	0.885481	0.00824992	0.923775	-0.0453436	0.59879	0.197178	0.0209168	-0.292448	0.000524772	0.0409948	0.634334	0.036968	0.66801	0.118141	0.169145	0.00545494	0.949556	0.802462	4.54162e-32	0.3159	0.000169645	-0.0831578	0.333997	-0.0856461	0.319684	-0.0369471	0.668186	-0.0569873	0.508327	-0.108371	0.207475	-0.361446	1.42817e-05	-0.0966174	0.261376
CSDC2	blue	0.0105528	0.902591	0.0807775	0.348066	0.0282067	0.743523	-0.129953	0.130139	0.0641593	0.456361	0.0101196	0.906571	-0.0396521	0.645484	0.0700897	0.415723	-0.177361	0.0381349	-0.187581	0.0281643	0.0849752	0.323504	0.105749	0.218747	-0.175443	0.0403033	0.496079	7.08112e-10	0.2645	0.00178806	-0.205299	0.0161002	0.0996322	0.246715	0.0192911	0.822953	0.175313	0.0404545	0.182577	0.0327272	0.135626	0.114056	-0.437772	8.81865e-08
GAS2	blue	-0.0590114	0.493357	0.0719259	0.403583	0.0296675	0.730739	-0.043689	0.612208	9.23696e-05	0.999145	0.028083	0.74461	-0.00967941	0.910618	0.0686118	0.425648	-0.446943	4.37795e-08	-0.140331	0.101926	-0.0346286	0.687887	-0.216088	0.0112094	-0.0745346	0.3867	0.645779	1.59459e-17	0.612812	1.73832e-15	-0.191933	0.0246485	0.0346952	0.687318	0.0343757	0.690049	-0.0369518	0.668147	0.163431	0.0563605	-0.282831	0.000811743	0.0632901	0.462497
SYBU	blue	-0.00550461	0.949098	0.197641	0.0206118	-0.0607861	0.480427	-0.110021	0.200598	-0.0319481	0.710927	0.00996425	0.907999	-0.052643	0.541234	0.217757	0.0105827	-0.262482	0.00194409	-0.0494308	0.566224	-0.000466299	0.995685	-0.207858	0.0147971	-0.127158	0.138679	0.608297	3.16896e-15	0.342321	4.23167e-05	-0.141437	0.0992278	-0.0482517	0.575532	-0.00430892	0.960144	-0.101241	0.239129	0.0725517	0.399493	-0.336127	5.92697e-05	0.0871506	0.311225
AZGP1	blue	-0.107624	0.210642	-0.0764686	0.374464	0.130454	0.128653	0.0332271	0.699899	-0.107644	0.210557	0.0172691	0.841252	-0.012252	0.887003	0.0554034	0.520203	-0.345984	3.45529e-05	0.156743	0.0673781	0.154864	0.07077	0.181306	0.0339814	0.0808919	0.347381	0.616212	1.09898e-15	0.155803	0.0690576	-0.16999	0.0470414	-0.0839353	0.329482	-0.0945941	0.271542	-0.143648	0.094004	-0.21331	0.0123241	-0.429318	1.65168e-07	0.0953786	0.267569
CTRB1	blue	-0.0392375	0.648944	-0.00891069	0.91769	0.0338691	0.694387	-0.0745163	0.386818	-0.0323753	0.707237	0.00428733	0.960344	-0.0511663	0.552654	0.142767	0.0960585	-0.236726	0.00535082	-0.0840356	0.328903	-0.00676813	0.937435	-0.0170452	0.843284	-0.107251	0.212238	0.84678	7.91951e-39	0.316137	0.00016764	-0.0492126	0.56794	-0.00836745	0.922692	0.0175776	0.838454	0.0608374	0.480056	0.030523	0.723286	-0.239189	0.00487828	-0.125392	0.14429
TMEM37	blue	-0.149154	0.0819385	0.0208393	0.809006	0.00255181	0.97639	-0.039808	0.644185	0.0233341	0.786658	0.08943	0.298691	-0.056081	0.515105	0.142991	0.0955332	-0.310341	0.000223618	0.132794	0.121879	-0.0226508	0.792762	0.13362	0.119555	0.0663746	0.440928	0.338605	5.18392e-05	0.179013	0.0363466	0.0386697	0.653693	-0.0865581	0.314539	-0.00934738	0.913672	-0.0556436	0.518393	-0.160075	0.0616886	-0.326825	9.70177e-05	0.133817	0.119006
SSR4	blue	-0.0541406	0.529772	0.00882479	0.918481	0.174569	0.0413254	-0.0749208	0.384238	-0.000954122	0.991171	-0.0476814	0.58006	-0.0581118	0.499982	-0.0464367	0.589998	-0.25076	0.0031211	-0.125649	0.143464	0.440902	6.95979e-08	0.344333	3.78696e-05	0.00106541	0.990142	0.605811	4.39298e-15	0.429517	1.62787e-07	-0.173918	0.0421002	0.232429	0.0062737	0.106724	0.214502	-0.0345718	0.688373	-0.178136	0.0372871	-0.408568	7.18106e-07	-0.462443	1.27765e-08
DCAF11	blue	-0.0352942	0.682209	0.0897385	0.29702	0.0670805	0.436073	0.00750927	0.9306	0.10002	0.244871	0.0717797	0.404542	-0.00757843	0.929963	0.120974	0.159081	-0.274211	0.00118473	-0.165441	0.0533553	0.141355	0.0994262	-0.131623	0.125235	-0.146918	0.0866779	0.61785	8.79479e-16	0.424697	2.31093e-07	0.00274016	0.974648	0.130041	0.129878	0.0874463	0.30958	0.023278	0.787158	0.0157787	0.854794	-0.342471	4.19672e-05	-0.0282422	0.743212
BHLHA15	blue	-0.125342	0.144453	0.0805559	0.349394	0.138162	0.107386	-0.140915	0.100495	-0.015357	0.858635	-0.0272361	0.752057	-0.0651142	0.449672	0.109855	0.20128	-0.183281	0.0320496	-0.149075	0.0821021	0.0841093	0.328477	-0.0594847	0.489891	-0.105325	0.220606	0.827336	1.26088e-35	0.309262	0.00023579	-0.132889	0.121611	0.0493301	0.567016	0.131823	0.124656	0.036791	0.669505	0.0617828	0.473245	-0.203736	0.0169438	-0.151736	0.0767242
CLPSL1	blue	-0.047749	0.579522	-0.00707634	0.934592	0.10231	0.234179	-0.0885821	0.303314	-0.00127726	0.988181	0.0503512	0.559007	-0.018911	0.826386	0.130083	0.129752	-0.203792	0.0169132	-0.0702889	0.414396	0.192297	0.0243724	0.0853204	0.321535	-0.0919538	0.285207	0.74702	1.05591e-25	0.3099	0.000228519	-0.149102	0.0820447	0.0176701	0.837615	-0.035691	0.678832	-0.0140831	0.870254	-0.0308276	0.720638	-0.222702	0.00890406	-0.232251	0.00631485
AL034369.1	blue	-0.0510619	0.553466	0.0295227	0.732002	0.0974705	0.257168	-0.0734338	0.393772	-0.0144708	0.866714	-0.039112	0.649992	-0.0581445	0.49974	0.0472019	0.583879	-0.177034	0.0384969	-0.115078	0.18055	0.13502	0.115696	0.00887686	0.918002	-0.149637	0.0809422	0.736832	1.03592e-24	0.243072	0.00420877	-0.12367	0.149928	0.0411482	0.633065	0.0220052	0.798542	0.0192076	0.823707	0.0360282	0.675968	-0.18587	0.0296596	-0.216531	0.0110399
GP2	blue	0.00458792	0.957566	0.00856269	0.920894	0.0283551	0.742221	-0.104209	0.225567	-0.0273516	0.75104	-0.0100955	0.906793	-0.0486555	0.572336	0.131215	0.12642	-0.279838	0.000926875	-0.0777215	0.366665	0.0264989	0.758559	-0.083944	0.329432	-0.108761	0.205831	0.86963	3.26379e-43	0.323466	0.000115462	-0.0853668	0.321271	-0.0108131	0.900201	0.0339198	0.693953	0.0290454	0.736174	0.0197251	0.819038	-0.295506	0.000455326	-0.017527	0.838913
ALDOB	blue	0.0593104	0.491166	-0.0341367	0.692094	-0.150879	0.0784239	0.0141042	0.870061	-0.10436	0.22489	0.10095	0.240488	0.125157	0.145051	0.0795369	0.355543	-0.376739	5.69116e-06	0.0809207	0.347209	-0.023217	0.787704	0.0759384	0.377795	0.106407	0.215877	0.304651	0.000295054	0.0898751	0.296283	-0.140763	0.100864	-0.0090035	0.916836	-0.00289185	0.973245	-0.119927	0.162746	-0.0916842	0.286627	-0.28131	0.000868508	0.188464	0.0274184
CEACAM7	blue	-0.0786588	0.360896	0.0493912	0.566535	-0.0736803	0.392181	-0.0320994	0.709619	0.0138397	0.872477	0.101075	0.239903	0.0126459	0.883396	0.0216322	0.801885	-0.333312	6.89183e-05	-0.028626	0.739847	-0.0891804	0.300047	-0.145423	0.0899677	0.0375874	0.662784	0.337487	5.50766e-05	0.303306	0.000314768	-0.0792355	0.357375	-0.0305055	0.723437	0.174866	0.0409757	-0.0355316	0.680188	0.057812	0.502199	-0.229523	0.00697581	0.181058	0.0342304
CALR	blue	-0.0638277	0.458697	0.0280279	0.745093	-0.127912	0.136336	0.120788	0.159727	0.118589	0.167522	-0.0703573	0.41394	-0.115455	0.179115	-0.063182	0.463263	0.42747	1.89035e-07	0.176432	0.0391723	-0.447538	4.18029e-08	-0.146385	0.0878405	-0.0418083	0.627618	-0.472882	5.38205e-09	-0.271448	0.00133397	0.191223	0.0251954	-0.346573	3.3439e-05	-0.231797	0.00642087	-0.00377948	0.965038	0.0357031	0.67873	0.380274	4.57024e-06	0.215097	0.0115961
GPHA2	blue	-0.0908307	0.291156	0.0360779	0.675547	0.121907	0.155868	-0.150932	0.0783191	-0.0296405	0.730974	0.0184094	0.830921	-0.0393984	0.6476	0.133237	0.12063	-0.282619	0.000819432	-0.159503	0.0626356	0.149829	0.0805483	-0.0230854	0.788878	-0.112178	0.191857	0.887454	2.97413e-47	0.394367	1.85724e-06	-0.0847684	0.324687	0.0772569	0.369546	0.0256871	0.765738	0.0716397	0.405461	0.0390349	0.650637	-0.263902	0.00183306	-0.180581	0.0347147
AL121929.2	blue	-0.0679306	0.430268	-0.00950475	0.912224	0.0715424	0.406101	0.000144842	0.99866	0.140295	0.102014	-0.0768931	0.37181	-0.12331	0.151127	0.0364079	0.672749	-0.418002	3.72663e-07	-0.189457	0.0265995	0.316496	0.000164641	0.16471	0.0544337	0.131904	0.124422	0.724006	1.58683e-23	0.642168	2.74135e-17	-0.255213	0.00261398	0.187104	0.028575	0.0127101	0.882808	-0.0238664	0.781912	0.0326981	0.704453	-0.384994	3.3959e-06	-0.384481	3.50826e-06
SPP1	blue	-0.106819	0.214094	0.109733	0.201784	-0.0579619	0.501089	-0.0346677	0.687553	0.110334	0.199313	0.00202454	0.981268	-0.0974017	0.257505	0.121424	0.157524	0.00215932	0.980021	-0.104057	0.226244	-0.234736	0.00576198	-0.179007	0.0363526	-0.257875	0.00234758	0.412277	5.5619e-07	0.197494	0.0207085	-0.000507413	0.995305	-0.145275	0.0902989	0.00363207	0.966401	0.273673	0.00121251	0.17265	0.0436463	0.137227	0.109808	-0.089784	0.296775
VEPH1	blue	-0.0880146	0.306435	0.1107	0.197814	0.00500484	0.953714	-0.00795386	0.926503	0.127173	0.138633	-0.0667916	0.438057	-0.141637	0.0987457	0.0969642	0.259659	-0.101339	0.238674	-0.0516915	0.548579	-0.0119029	0.890202	-0.100925	0.240607	-0.212578	0.0126333	0.773501	1.6161e-28	0.336533	5.79891e-05	-0.0772756	0.369429	-0.134277	0.117731	-0.0378596	0.660493	0.0417623	0.627997	0.0629679	0.464783	-0.132682	0.122199	-0.137763	0.108413
PDZK1	blue	0.00376359	0.965185	0.059887	0.486955	-0.218201	0.0104217	-0.0221277	0.797444	0.0461469	0.592323	-0.0501402	0.560658	-0.112599	0.190185	0.0785274	0.361702	-0.396009	1.66777e-06	-0.119954	0.16265	-0.0214104	0.803875	-0.192995	0.0238503	-0.086857	0.312865	0.47039	6.63332e-09	0.526042	4.07571e-11	-0.106729	0.214481	0.0637242	0.459427	0.117224	0.172501	-0.0180676	0.834014	0.153725	0.0728929	-0.254586	0.00268051	0.0512157	0.55227
TC2N	blue	-0.0963206	0.262851	0.0658516	0.444545	0.0329126	0.702605	0.0222044	0.796757	-0.0495901	0.564971	0.126731	0.140022	0.0907442	0.291618	0.143248	0.0949319	-0.0877635	0.307822	0.238082	0.00508591	-0.114555	0.182553	-0.194927	0.0224542	0.125285	0.144635	0.44243	6.19495e-08	0.0297162	0.730313	0.0362917	0.673733	-0.3167	0.000162959	-0.117222	0.172509	-0.248207	0.00345032	-0.196082	0.0216535	-0.388358	2.74043e-06	0.463633	1.15944e-08
SLC18B1	blue	0.0643146	0.455269	-0.150056	0.0800847	-0.0677842	0.431264	-0.195915	0.021768	-0.197054	0.0209988	-0.107969	0.209174	-0.0195465	0.820648	0.107126	0.212773	-0.488327	1.4184e-09	-0.264244	0.00180723	0.0292719	0.734194	-0.117487	0.171533	0.148134	0.084074	0.371467	7.8569e-06	0.405602	8.7892e-07	-0.041421	0.630812	0.258923	0.00224964	0.211009	0.0133199	0.101318	0.23877	0.174643	0.041238	-0.32601	0.000101222	0.043791	0.611377
MTUS1	blue	0.00293344	0.972861	0.0939517	0.274825	-0.101002	0.240246	-0.0134619	0.87593	-0.0395022	0.646734	0.0503879	0.558721	0.0175871	0.838368	0.184174	0.0312075	-0.372728	7.27735e-06	-0.0395921	0.645985	-0.188326	0.0275344	-0.300876	0.000353532	-0.0026384	0.97559	0.555715	1.80606e-12	0.289669	0.000596191	-0.1101	0.200273	-0.109669	0.202051	0.0431905	0.616277	-0.0478278	0.578896	0.150756	0.0786705	-0.268045	0.00154128	0.276012	0.00109582
HOGA1	blue	-0.0524592	0.542649	-0.0256029	0.766484	0.0201874	0.814871	0.00609118	0.943682	0.0311129	0.718161	-0.0938103	0.275551	-0.148551	0.0831952	0.111646	0.193989	-0.361006	1.46547e-05	-0.0258678	0.764138	0.134674	0.11664	0.124202	0.148169	-0.00771545	0.9287	0.877789	5.53066e-45	0.427814	1.84358e-07	-0.14652	0.0875454	-0.0072861	0.932658	-0.0467781	0.587265	-0.0327857	0.703698	-0.0720181	0.402979	-0.405091	9.09893e-07	-0.173745	0.0423091
SUCLG1	blue	0.0212161	0.80562	-0.0707357	0.411428	0.243406	0.00415524	0.00130326	0.987941	0.0551777	0.521907	-0.0459429	0.593963	-0.0910692	0.289886	0.00929198	0.914182	-0.125044	0.145417	0.0848094	0.324452	0.470385	6.63576e-09	0.260542	0.00210566	-0.113041	0.188441	0.537835	1.22472e-11	0.243958	0.00406813	-0.160922	0.0603061	-0.0128327	0.881685	-0.116351	0.175741	-0.188401	0.0274715	-0.271805	0.00131378	-0.438053	8.63407e-08	-0.207135	0.0151558
PRSS2	blue	0.00470299	0.956503	0.0196138	0.820041	0.0719676	0.403309	-0.0229773	0.789843	-0.0501594	0.560507	-0.0185402	0.829738	-0.0454079	0.598271	0.0768473	0.372096	-0.225299	0.00812063	-0.004523	0.958166	-0.00991119	0.908487	-0.062513	0.468022	-0.12396	0.148967	0.777731	5.2888e-29	0.253801	0.00276601	-0.0907384	0.291649	-0.0804367	0.35011	0.0442315	0.607795	0.00990007	0.908589	-0.0128395	0.881624	-0.249465	0.00328445	0.0216748	0.801503
SERPINA1	blue	0.0573224	0.505832	0.034998	0.684734	-0.0626197	0.467261	-0.0370412	0.667391	-0.0546131	0.526181	0.0050586	0.953217	0.0744402	0.387304	0.0811191	0.346024	-0.0897651	0.296877	0.074781	0.385129	-0.120492	0.16076	0.0480064	0.577477	0.0736598	0.392313	0.329015	8.65108e-05	0.101257	0.239055	-0.116187	0.176357	-0.174339	0.0415979	0.00447955	0.958567	-0.0192228	0.82357	-0.0640966	0.456802	-0.159907	0.061966	-0.0300301	0.727577
PCCA	blue	-0.0695302	0.419464	0.0444519	0.606005	0.203536	0.0170547	0.0276784	0.748164	0.00295031	0.972705	-0.0460608	0.593015	-0.0947845	0.270574	0.0815025	0.343742	-0.149158	0.0819293	0.145502	0.0897916	0.136891	0.110689	0.0374942	0.66357	-0.1616	0.0592178	0.615816	1.15961e-15	0.258061	0.00232993	-0.224916	0.00823225	-0.254778	0.00266003	-0.164526	0.0547065	-0.120428	0.160986	-0.119346	0.16481	-0.319646	0.000140401	-0.0180478	0.834194
TMED11P	blue	-0.0770481	0.370844	0.0629839	0.464669	0.111348	0.195186	-0.101445	0.23818	-0.0148824	0.86296	0.0069435	0.935817	-0.0296046	0.731287	0.119628	0.163806	-0.270667	0.00137914	-0.147346	0.0857536	0.188302	0.0275544	-0.0319593	0.71083	-0.136605	0.111443	0.916963	1.00065e-55	0.386395	3.10664e-06	-0.13374	0.119222	0.064125	0.456602	0.0350813	0.684023	0.0431563	0.616557	0.0362109	0.674418	-0.276047	0.00109417	-0.198996	0.0197424
COL9A3	blue	-0.00613435	0.943283	-0.106425	0.2158	0.0859125	0.318176	-0.0141252	0.869869	-0.0258225	0.764539	0.150943	0.0782971	0.0657277	0.445404	0.0185936	0.829255	-0.00781644	0.927769	0.10619	0.21682	0.114243	0.183753	0.34178	4.35926e-05	0.0913202	0.288553	0.307998	0.000250823	0.08542	0.320968	-0.0532038	0.536927	-0.0319089	0.711266	-0.152358	0.0755104	-0.136355	0.112105	-0.222236	0.00905176	-0.23223	0.00631974	-0.252891	0.00286828
MT-CO1	blue	0.0911985	0.289199	-0.101862	0.236244	-0.209894	0.0138272	0.0382784	0.656974	-0.0418205	0.627517	-0.0783665	0.362689	-0.0661965	0.442158	0.053245	0.536612	-0.00717062	0.933723	0.0403265	0.639874	-0.407478	7.73647e-07	-0.135185	0.115246	0.270991	0.00136021	-0.491014	1.11699e-09	-0.241961	0.00439144	0.153288	0.0737229	-0.0245026	0.776249	0.0307095	0.721664	0.0185021	0.830083	0.106414	0.215845	0.13749	0.109122	0.337034	5.64424e-05
P2RX1	blue	-0.0899468	0.295896	0.0203099	0.813769	0.137051	0.110268	-0.134633	0.116753	-0.0300522	0.727384	0.0359185	0.6769	0.00993191	0.908296	0.0846395	0.325426	-0.393171	2.00802e-06	-0.333357	6.87515e-05	0.300364	0.000362247	0.0706789	0.411805	-0.0260091	0.762888	0.775047	1.0776e-28	0.377972	5.2735e-06	-0.148182	0.0839734	0.341705	4.37713e-05	0.197987	0.0203869	0.164295	0.0550532	0.119861	0.162979	-0.23537	0.00562794	-0.357298	1.81839e-05
PLA2G1B	blue	-0.040826	0.635732	0.0258283	0.764488	0.0588566	0.494493	-0.0851067	0.322753	-0.0478325	0.578858	0.00536839	0.950356	-0.0517651	0.548009	0.144932	0.0910699	-0.251946	0.00297804	-0.112625	0.190084	0.0409021	0.635102	-0.0711887	0.408431	-0.166771	0.0514415	0.87027	2.39408e-43	0.34159	4.40493e-05	-0.0530524	0.538088	0.0132672	0.877711	0.0470158	0.585364	0.0733912	0.394047	0.0518068	0.547686	-0.23955	0.00481218	-0.113178	0.187902
FGFR3	blue	-0.000411708	0.99619	-0.0961895	0.263504	0.0453195	0.598985	-0.0758348	0.378448	-0.00851499	0.921334	-0.0138659	0.872237	-0.104793	0.222963	0.0524806	0.542484	-0.232859	0.00617542	0.23141	0.0065123	-0.0194334	0.821668	0.309002	0.000238816	0.26796	0.00154684	0.663212	1.04923e-18	0.162206	0.0582603	-0.0786522	0.360937	-0.193916	0.0231756	-0.134641	0.11673	-0.164797	0.0543033	-0.302009	0.000334946	-0.44911	3.69889e-08	0.0254532	0.767811
PRSS3	blue	-0.0522166	0.544519	0.119217	0.16527	0.0422344	0.624113	-0.00333976	0.969103	-0.012153	0.88791	0.0441753	0.608251	-0.0089307	0.917506	0.0484412	0.574031	-0.0815576	0.343415	0.137673	0.108646	0.100861	0.240906	-0.00901489	0.916731	-0.127654	0.137132	0.659411	1.92864e-18	0.157633	0.0658176	-0.0357727	0.678138	-0.148553	0.0831915	-0.0678661	0.430707	-0.135788	0.113619	-0.183551	0.0317931	-0.332174	7.32205e-05	0.121601	0.156914
SEL1L	blue	-0.0656553	0.445907	0.129222	0.132335	0.0426926	0.620352	-0.0746278	0.386105	0.0620528	0.47131	0.148646	0.0829968	0.0464042	0.590259	0.15779	0.0655465	-0.207274	0.0150861	-0.320923	0.000131552	-0.200361	0.0188981	-0.610724	2.29747e-15	-0.339991	4.80735e-05	0.552851	2.47301e-12	0.348316	3.03308e-05	-0.0483381	0.574847	0.00425566	0.960636	0.243853	0.00408461	0.246729	0.003655	0.420183	3.19294e-07	0.128376	0.134908	0.177026	0.0385064
PIGR	blue	0.142542	0.0965897	0.0327196	0.704268	-0.129233	0.132301	-0.0130291	0.879888	-0.0555953	0.518757	0.141062	0.100138	0.0558915	0.516528	0.0831466	0.334063	-0.341368	4.45887e-05	0.147917	0.0845341	-0.203712	0.0169573	-0.0351128	0.683754	0.0209165	0.808311	0.29966	0.000374545	0.0434987	0.613761	-0.10863	0.206381	-0.163434	0.056356	-0.0223057	0.79585	-0.119135	0.16556	-0.0616598	0.474128	-0.235721	0.00555502	0.341808	4.35248e-05
BACE1	blue	-0.0925163	0.282257	0.0595485	0.489424	-0.0359934	0.676264	-0.113388	0.187078	0.0438131	0.611198	0.0927852	0.280855	-0.00845117	0.921921	0.0975469	0.256794	-0.417484	3.86514e-07	-0.532611	2.09821e-11	-0.141861	0.0982081	-0.49798	5.95605e-10	-0.290879	0.000564072	0.601185	8.00596e-15	0.59249	2.41052e-14	-0.157156	0.0666513	0.198912	0.0197952	0.248344	0.00343191	0.399051	1.36411e-06	0.638604	4.64633e-17	0.305748	0.000279811	-0.177629	0.0378394
PMM1	blue	-0.0234844	0.785317	-0.064173	0.456265	-0.0549139	0.523902	0.0119083	0.890153	0.0178377	0.836097	0.00252171	0.976669	-0.0212468	0.805344	0.0450451	0.601201	-0.217638	0.0106266	-0.239349	0.00484894	0.145921	0.0888618	0.262837	0.0019158	-0.16215	0.0583485	0.386478	3.09034e-06	0.189414	0.026635	-0.108566	0.206653	0.257202	0.00241254	0.00403056	0.962717	0.189709	0.0263954	0.141887	0.098147	0.120584	0.160438	-0.589065	3.68807e-14
FLRT2	blue	-0.0162524	0.850486	-0.0349655	0.685011	-0.0884281	0.304159	-0.00793036	0.926719	0.0118881	0.890338	-0.00696133	0.935653	-0.1152	0.180086	0.118541	0.167697	-0.513331	1.41553e-10	-0.488499	1.39697e-09	-0.0412227	0.63245	-0.339091	5.04888e-05	-0.256241	0.00250807	0.732922	2.42039e-24	0.57473	2.07284e-13	-0.13298	0.121352	0.297248	0.000419664	0.298353	0.000398399	0.316614	0.000163663	0.473297	5.197e-09	-0.0263353	0.760004	-0.202899	0.0174113
SLC1A1	blue	0.0209338	0.808156	0.0213734	0.804208	-0.204865	0.0163309	-0.0397417	0.644737	-0.127128	0.138775	-0.0207326	0.809965	-0.0142674	0.868571	-0.0196516	0.8197	-0.287227	0.000666262	0.193194	0.023703	-0.210979	0.0133331	-0.117588	0.171163	0.105937	0.217923	0.194265	0.0229244	0.0696066	0.418953	-0.0613996	0.475999	-0.208561	0.0144557	-0.0700665	0.415878	-0.152161	0.0758929	-0.0594651	0.490034	-0.266995	0.00161092	0.416992	4.0014e-07
RN7SL186P	blue	-0.058218	0.499197	0.0433012	0.615373	0.0825869	0.337338	-0.0355538	0.679999	0.0501947	0.560231	-0.0159271	0.853445	-0.0754558	0.380842	0.123324	0.15108	-0.270709	0.0013767	-0.0849647	0.323564	0.135795	0.1136	0.0942044	0.273531	0.105529	0.219709	0.870089	2.61389e-43	0.342045	4.29632e-05	-0.107008	0.213281	0.0374769	0.663715	-0.0305908	0.722696	0.0114125	0.8947	-0.0388635	0.652071	-0.332989	7.01142e-05	-0.191369	0.0250822
PLPP5	blue	-0.113863	0.185226	0.0931296	0.279066	0.128725	0.133839	-0.0364507	0.672386	0.0244639	0.776593	0.111199	0.195788	0.072379	0.400619	0.0798551	0.353616	-0.140416	0.101716	-0.0299037	0.728679	0.275304	0.00113003	0.111098	0.196196	0.124415	0.147468	0.468892	7.51536e-09	0.233904	0.00594201	-0.0196446	0.819764	0.0275456	0.749333	-0.0288374	0.737995	-0.130222	0.12934	-0.115398	0.179332	-0.317598	0.000155747	-0.175558	0.040171
CPA2	blue	-0.0303808	0.724522	0.00897343	0.917113	0.0538994	0.531609	-0.0870439	0.311821	-0.0311244	0.718061	0.0135872	0.874785	-0.0385334	0.654835	0.158285	0.0646947	-0.27359	0.00121689	-0.142156	0.0975041	0.0250543	0.771348	-0.0924955	0.282367	-0.154794	0.0709003	0.883043	3.41854e-46	0.367374	1.00527e-05	-0.0504727	0.558058	0.0298403	0.729231	0.0589451	0.493844	0.104652	0.22359	0.0766114	0.37357	-0.241992	0.00438624	-0.119328	0.164871
RORC	blue	0.0193304	0.822599	0.149896	0.0804109	0.150028	0.0801422	0.00223585	0.979313	0.0355536	0.680001	0.192687	0.024079	0.0658968	0.444232	0.0657064	0.445552	-0.18564	0.0298654	0.30255	0.000326394	0.0305399	0.723138	0.159776	0.0621815	0.0921214	0.284326	0.530257	2.66608e-11	0.238404	0.00502464	-0.108265	0.207921	-0.339528	4.93035e-05	-0.175229	0.0405512	-0.21772	0.0105964	-0.284543	0.000751934	-0.418699	3.54731e-07	0.108074	0.20873
CTRC	blue	-0.0427676	0.619738	0.00649787	0.939929	0.0433988	0.614576	-0.094552	0.271756	-0.0369645	0.668039	-0.00191793	0.982254	-0.0523403	0.543565	0.157341	0.0663264	-0.272967	0.00124991	-0.126654	0.140263	0.0398036	0.644222	-0.0574285	0.505044	-0.14726	0.0859406	0.896074	1.84908e-49	0.359971	1.55685e-05	-0.056091	0.51503	0.0292174	0.734671	0.0367915	0.669502	0.0829983	0.334929	0.0533816	0.535566	-0.256151	0.00251716	-0.132656	0.122272
DEFB1	blue	-0.139315	0.104456	0.11312	0.188131	-0.00129959	0.987975	-0.0233711	0.786327	0.0750408	0.383474	-0.0309	0.720009	-0.0495567	0.565234	0.0991032	0.249246	0.00801713	0.92592	0.103172	0.230241	0.0749319	0.384167	0.165303	0.0535574	-0.0764817	0.374382	0.510612	1.83547e-10	0.124894	0.145905	-0.148247	0.083836	-0.173187	0.0429861	-0.144513	0.0920185	-0.0667821	0.438122	-0.136284	0.112295	-0.191316	0.0251233	-0.220482	0.0096262
MT-RNR2	blue	0.1275	0.137613	-0.103221	0.23002	-0.223886	0.00853884	0.167363	0.050607	-0.0719121	0.403673	-0.125023	0.145484	-0.0131785	0.878522	-0.0478114	0.579026	0.249471	0.00328358	0.307509	0.000256879	-0.142287	0.0971929	0.21249	0.0126711	0.271991	0.00130337	-0.512493	1.53396e-10	-0.406208	8.43507e-07	0.152006	0.0761956	-0.182283	0.0330143	-0.227078	0.00761944	-0.210397	0.0135962	-0.291441	0.000549685	-0.0775786	0.36755	0.190559	0.0257154
FXYD2	blue	-0.0507251	0.556088	-0.024366	0.777464	-0.00951348	0.912144	-0.0462937	0.591145	-0.00425044	0.960685	-0.0557923	0.517274	-0.141279	0.0996092	0.0913777	0.288248	-0.455275	2.27548e-08	-0.184517	0.0308895	0.0964715	0.2621	0.0548649	0.524273	-0.0479045	0.578286	0.783949	9.78643e-30	0.626902	2.50587e-16	-0.158357	0.064571	0.132498	0.122721	0.0658842	0.444319	0.0595056	0.489738	0.0937522	0.27585	-0.333383	6.86563e-05	-0.277458	0.00102891
AC008556.1	blue	-0.103161	0.23029	0.0724679	0.40004	0.0991382	0.249077	-0.0352809	0.682322	0.220878	0.00949376	-0.0277621	0.747428	-0.0810848	0.346229	0.0231982	0.787871	0.0512021	0.552375	-0.0251872	0.770169	0.272001	0.00130276	0.248252	0.0034443	-0.212946	0.0124771	0.495297	7.60063e-10	0.150766	0.0786517	-0.0587412	0.495342	0.0427872	0.619577	-0.0220874	0.797805	0.0176674	0.83764	-0.156526	0.0677637	-0.134683	0.116616	-0.422641	2.67918e-07
GSTA2	blue	-0.074939	0.384122	0.0676212	0.432376	0.0587669	0.495153	-0.0898366	0.296491	-0.0677081	0.431783	0.00707215	0.934631	-0.0149232	0.862588	0.134207	0.117924	-0.2805	0.000900183	-0.11413	0.184192	0.114711	0.181955	-0.0738154	0.391312	-0.18786	0.0279269	0.93172	3.03424e-61	0.362856	1.31452e-05	-0.1212	0.158297	0.0267269	0.756546	0.0258801	0.76403	0.0432231	0.616011	0.0122655	0.88688	-0.323868	0.000113095	-0.09801	0.254531
CES1	blue	0.0401256	0.641543	-0.119214	0.165281	-0.0899631	0.295808	0.0236664	0.783694	-0.0515313	0.549821	0.0643445	0.455059	0.0528192	0.539878	0.0983476	0.252891	-0.422548	2.69704e-07	-0.302308	0.000330191	-0.0911924	0.289231	-0.108056	0.208803	-0.142637	0.0963635	0.385735	3.23987e-06	0.281384	0.000865636	-0.0592802	0.491387	0.239952	0.0047397	0.1233	0.151157	0.299632	0.00037503	0.277407	0.00103118	-0.0400745	0.641968	-0.145268	0.0903154
RGN	blue	-0.0725007	0.399826	0.0635203	0.460868	0.0305789	0.722799	-0.0631172	0.463723	0.0701066	0.41561	0.00743424	0.931292	-0.0915739	0.28721	0.0930993	0.279223	-0.318529	0.000148588	-0.171937	0.0445357	0.180291	0.0350116	-0.0176344	0.83794	-0.134346	0.11754	0.818832	2.38599e-34	0.645686	1.61721e-17	-0.220669	0.00956352	0.0608349	0.480074	0.0282061	0.743529	0.0372885	0.665304	0.091203	0.289175	-0.318065	0.000152118	-0.282913	0.000808757
CPA1	blue	-0.0395772	0.646109	0.0175996	0.838254	0.0562057	0.51417	-0.0798391	0.353713	-0.0472337	0.583626	0.00549484	0.949188	-0.0499833	0.561887	0.150279	0.0796335	-0.233677	0.00599211	-0.119223	0.165246	-0.00188972	0.982515	-0.108596	0.206525	-0.172932	0.0432977	0.85295	6.14427e-40	0.338118	5.32267e-05	-0.0518059	0.547693	0.00655232	0.939426	0.068374	0.427257	0.0772961	0.369302	0.0706986	0.411674	-0.220104	0.00975412	-0.0858314	0.318635
PABPC4	blue	-0.051618	0.549148	-0.0387665	0.652882	0.116773	0.174173	-0.0266476	0.757246	0.0324887	0.706258	-0.0481223	0.576557	-0.0504584	0.558169	0.0817337	0.34237	-0.3002	0.00036508	-0.409518	6.72779e-07	0.281508	0.000860914	-0.0546171	0.526151	0.0584716	0.497327	0.587187	4.64619e-14	0.372869	7.2153e-06	-0.211166	0.0132499	0.339028	5.06624e-05	0.254218	0.00272029	0.204982	0.0162682	0.261155	0.00205333	-0.0664447	0.440445	-0.411614	5.82288e-07
CTNND2	blue	-0.0173649	0.840383	0.0535977	0.533913	0.0212376	0.805427	-0.0680823	0.429236	0.0382883	0.656891	-0.0132615	0.877763	-0.0901637	0.294728	0.175572	0.0401543	-0.412956	5.30582e-07	-0.263022	0.00190114	-0.0513663	0.5511	-0.229072	0.00709065	-0.205048	0.0162331	0.875889	1.4664e-44	0.61678	1.01741e-15	-0.0765002	0.374266	0.093096	0.27924	0.144497	0.092055	0.153432	0.0734474	0.224877	0.00824341	-0.249311	0.00330429	-0.103687	0.227912
ACSM3	blue	-0.0419892	0.626129	0.0880611	0.306178	0.0315312	0.714535	0.00864482	0.920138	-0.0052854	0.951122	-0.0659946	0.443554	-0.114133	0.184178	0.128962	0.133121	-0.275527	0.00111912	0.089698	0.297239	0.119936	0.162717	0.0245758	0.775598	-0.0211405	0.806299	0.798197	1.64512e-31	0.27517	0.00113658	-0.126883	0.139541	-0.153449	0.0734157	-0.0868119	0.313117	-0.111036	0.196451	-0.138792	0.105777	-0.440759	7.03603e-08	0.0577369	0.502756
SLC43A1	blue	-0.0405945	0.63765	0.0135844	0.87481	0.190626	0.0256627	-0.0337509	0.695401	-0.0496563	0.564452	0.0719773	0.403246	0.0213873	0.804083	0.0881817	0.305514	-0.337798	5.41569e-05	-0.0183357	0.831588	0.260569	0.00210332	0.134858	0.116136	-0.0397022	0.645067	0.798688	1.42061e-31	0.275194	0.00113542	-0.215381	0.0114844	0.014049	0.870565	-0.015343	0.858762	-0.0411243	0.633263	-0.0929806	0.279839	-0.317368	0.000157567	-0.102416	0.233695
GCAT	blue	-0.0698295	0.417461	0.0921752	0.284044	0.241451	0.00447762	-0.0540596	0.530388	-0.0293016	0.733934	-0.0444001	0.606425	-0.0748204	0.384877	-0.0175832	0.838403	-0.0773462	0.36899	0.147594	0.0852227	0.397419	1.51981e-06	0.352491	2.39579e-05	-0.032664	0.704747	0.633342	1.00017e-16	0.194426	0.0228092	-0.316687	0.000163065	-0.127173	0.138633	-0.166325	0.0520762	-0.206632	0.0154096	-0.248623	0.00339468	-0.283065	0.000803296	-0.341738	4.36931e-05
CLDN2	blue	0.0267578	0.756274	-0.129278	0.132164	-0.0731428	0.395654	-0.0911936	0.289225	-0.132793	0.121883	0.0960734	0.264083	0.0121237	0.888179	0.0565913	0.511283	-0.428478	1.75632e-07	0.0743943	0.387598	-0.0874173	0.309742	0.0581641	0.499595	0.160984	0.0602059	0.345285	3.59228e-05	0.101721	0.236898	-0.119644	0.16375	-0.03896	0.651263	0.00608767	0.943714	-0.0861383	0.316901	-0.0191323	0.824387	-0.241432	0.00448086	0.172246	0.0441476
MT-ND3	blue	0.0657072	0.445546	-0.160178	0.0615184	-0.14014	0.102397	-0.0635643	0.460556	-0.116318	0.175868	0.0557895	0.517295	0.0349591	0.685066	0.015276	0.859372	-0.0444749	0.605818	0.0240598	0.780189	0.0644698	0.45418	0.179071	0.0362849	0.189721	0.0263859	-0.429032	1.68662e-07	-0.16842	0.0491457	-0.0152239	0.859847	0.148909	0.0824471	-0.0549952	0.523287	-0.0767172	0.372908	-0.0276627	0.748303	0.00182998	0.983068	-0.0486637	0.572271
SMARCD3	blue	-0.0294414	0.732713	-0.108638	0.206348	-0.0495	0.565679	0.0412595	0.632146	-0.00164905	0.984742	-0.0835883	0.331492	-0.0778339	0.36597	0.0439348	0.610207	-0.433072	1.25263e-07	-0.284709	0.000746354	0.134585	0.116883	0.227343	0.00754739	-0.00234562	0.978298	0.557781	1.43697e-12	0.454258	2.467e-08	-0.157624	0.0658343	0.244076	0.00404977	0.0636968	0.45962	0.186282	0.0292941	0.218234	0.0104096	-0.0149122	0.862688	-0.570222	3.50711e-13
AC148476.1	blue	0.00793174	0.926706	-0.046301	0.591087	0.0551922	0.521797	0.0129026	0.881046	0.0390233	0.650733	-0.0480134	0.577422	-0.118616	0.167426	0.110033	0.200549	-0.240267	0.00468349	0.0431862	0.616312	0.155595	0.0694341	0.283472	0.000788825	0.107034	0.213168	0.772372	2.169e-28	0.243195	0.00418898	-0.0319113	0.711245	-0.00890756	0.917719	-0.0852316	0.322041	-0.0537693	0.532602	-0.197383	0.0207816	-0.41598	4.29623e-07	-0.233851	0.00595379
GDPD5	blue	0.114163	0.184064	-0.142959	0.0956073	0.0219563	0.79898	-0.109413	0.203112	-0.0426037	0.621081	-0.0753772	0.38134	0.014331	0.86799	0.0108811	0.899576	-0.149095	0.0820612	0.000231179	0.997861	0.180845	0.0344464	0.420893	3.03559e-07	0.175351	0.04041	0.477796	3.54626e-09	0.0781885	0.363784	0.00958391	0.911496	0.0982584	0.253324	-0.122923	0.152423	0.0207299	0.80999	-0.227864	0.00740712	-0.30177	0.00033879	-0.32453	0.000109295
AC156455.1	blue	-0.202906	0.0174075	0.0649406	0.450884	0.223362	0.00869883	0.0280311	0.745065	0.0254344	0.767977	-0.128647	0.134079	-0.0846511	0.32536	-0.0133631	0.876833	-0.196546	0.0213389	-0.128285	0.135186	0.28798	0.000643882	0.0824787	0.337974	-0.130437	0.128704	0.621111	5.62133e-16	0.347598	3.15775e-05	-0.268968	0.00148231	0.0192581	0.823251	-0.117031	0.173215	0.0591231	0.492538	0.0399747	0.642798	-0.143776	0.0937066	-0.292167	0.000531622
IL22RA1	blue	-0.0385757	0.654481	0.132822	0.1218	0.0507272	0.556072	-0.00282591	0.973855	0.0507892	0.555589	0.0849314	0.323754	-0.00780875	0.92784	0.102251	0.234451	-0.0610747	0.478341	0.32923	8.5538e-05	-0.00159184	0.985271	0.0745165	0.386816	-0.067989	0.429871	0.587916	4.24879e-14	-0.00594605	0.945022	-0.0435283	0.613518	-0.295734	0.000450516	-0.169662	0.0474743	-0.220175	0.00973028	-0.32192	0.000125014	-0.345969	3.45821e-05	0.267165	0.00159946
MT-CO2	blue	0.186336	0.0292456	-0.064706	0.452525	-0.0946125	0.271448	0.0463656	0.590569	-0.0400033	0.64256	-0.0213835	0.804117	0.0123553	0.886056	-0.0941905	0.273602	0.213851	0.0120998	0.25684	0.00244808	-0.0257045	0.765584	0.282387	0.000827918	0.178574	0.036814	-0.597577	1.27004e-14	-0.366347	1.06889e-05	0.0762567	0.375793	-0.054096	0.530112	-0.125262	0.144712	-0.187547	0.0281936	-0.26146	0.00202772	-0.0854435	0.320835	0.0982003	0.253606
SPINK1	blue	-0.005384	0.950212	0.0977618	0.255742	-0.0483057	0.575104	-0.12528	0.144653	-0.127139	0.138738	0.0809624	0.34696	0.00926172	0.91446	0.0647607	0.452142	-0.291225	0.000555163	0.130044	0.129868	0.101154	0.239538	0.126328	0.141297	0.0604821	0.482628	0.686728	1.97666e-20	0.11792	0.16995	-0.0363679	0.673087	-0.100606	0.242102	-0.091261	0.288867	-0.101321	0.238754	-0.231249	0.00655077	-0.438627	8.26849e-08	0.0923557	0.283098
ABCC6	blue	0.0107281	0.900981	0.0304317	0.72408	-0.0513516	0.551215	-0.0616758	0.474013	-0.182189	0.0331064	-0.0447464	0.603618	-0.0768956	0.371795	0.0846632	0.32529	-0.320594	0.00013378	0.152448	0.075335	0.0249463	0.772307	0.0776871	0.366878	0.0577507	0.502653	0.589268	3.59652e-14	0.188562	0.0273365	-0.147363	0.0857184	-0.1289	0.133309	-0.12302	0.152098	-0.163379	0.05644	-0.184109	0.0312685	-0.437974	8.68595e-08	0.173449	0.0426673
DBH-AS1	blue	-0.0617261	0.473652	-0.170175	0.0467984	0.106617	0.214965	-0.0470083	0.585425	0.0152106	0.859968	-0.0352872	0.682269	-0.0163873	0.849259	0.0405275	0.638206	-0.2675	0.00157707	-0.454046	2.50887e-08	0.320491	0.000134484	0.23059	0.00671025	0.141339	0.0994652	0.220946	0.00947129	0.273676	0.00121235	0.00306149	0.971677	0.64752	1.22476e-17	0.350205	2.72718e-05	0.178244	0.0371697	0.113449	0.186841	-0.124999	0.145562	-0.543035	7.10092e-12
PRDX4	blue	-0.132224	0.123505	0.0843545	0.327064	0.153683	0.0729732	-0.10593	0.217954	0.09386	0.275296	-0.0234876	0.785288	-0.0656441	0.445984	0.0769448	0.371488	-0.163868	0.0556956	-0.240876	0.00457661	0.239242	0.00486847	-0.0161446	0.851466	-0.285833	0.000709561	0.743659	2.26949e-25	0.440456	7.19981e-08	-0.179827	0.0354914	0.102059	0.235338	0.0784805	0.361989	0.118341	0.16842	0.112145	0.19199	-0.0755142	0.380473	-0.37946	4.80811e-06
MNX1	blue	-0.0698678	0.417205	0.00055091	0.994902	0.0814186	0.344241	0.0462697	0.591338	0.15477	0.0709445	-0.0708134	0.410913	-0.116853	0.173875	0.031354	0.71607	-0.10094	0.240538	0.365104	1.1509e-05	0.0936765	0.27624	0.416151	4.24519e-07	0.24013	0.0047078	0.639179	4.2695e-17	0.190275	0.0259411	-0.0772241	0.369749	-0.316012	0.000168693	-0.298834	0.000389464	-0.302771	0.000322949	-0.450308	3.36813e-08	-0.541231	8.58803e-12	-0.0178221	0.836238
APCS	blue	-0.0148379	0.863366	0.0744818	0.387038	-0.0532692	0.536426	0.0848864	0.324011	-0.0353754	0.681518	-0.0050113	0.953654	-0.0395532	0.646308	0.0824029	0.33842	-0.210207	0.0136833	0.0718329	0.404193	0.0494177	0.566326	0.0911368	0.289527	0.100859	0.240916	0.512876	1.47873e-10	0.175341	0.0404213	-0.0897441	0.29699	-0.114613	0.182329	-0.0869549	0.312318	-0.0990294	0.2496	-0.0851906	0.322274	-0.295013	0.000465928	-0.0638291	0.458687
BRSK2	blue	-0.0495972	0.564916	0.0500015	0.561744	0.150648	0.0788886	-0.0988871	0.250284	0.080198	0.351546	0.0152834	0.859305	-0.0414846	0.630287	0.107404	0.21158	-0.29287	0.00051464	-0.13607	0.112865	0.209508	0.0140066	0.0683955	0.427111	-0.0349638	0.685026	0.85489	2.68472e-40	0.476476	3.96939e-09	-0.218496	0.0103154	0.0630767	0.46401	0.00223066	0.979361	-0.00265035	0.975479	0.0147656	0.864025	-0.29399	0.000488625	-0.273783	0.0012068
SERPINA5	blue	-0.0754624	0.380801	0.0036243	0.966473	-0.0174393	0.839708	-0.0159052	0.853643	0.00827919	0.923505	-0.0379266	0.65993	-0.09261	0.281768	0.167797	0.0500033	-0.250361	0.00317063	-0.0387796	0.652772	-0.00348946	0.967719	0.0266831	0.756933	0.016013	0.852663	0.740002	5.14908e-25	0.354166	2.17736e-05	-0.11967	0.163656	-0.0555063	0.519427	-0.040551	0.638011	0.00713515	0.93405	0.0191958	0.823813	-0.25024	0.00318583	-0.158421	0.0644619
DERL2	blue	-0.0912809	0.288762	-0.00762893	0.929497	0.0687279	0.424863	-0.0905675	0.292562	-0.186131	0.0294274	-0.147942	0.0844804	-0.0619985	0.471699	-0.0758887	0.378108	-0.224163	0.00845545	-0.2849	0.000739975	0.294248	0.000482808	0.0983915	0.252678	-0.176988	0.0385491	0.454009	2.5161e-08	0.302146	0.00033275	-0.101555	0.237666	0.24676	0.00365057	0.109732	0.201789	0.127663	0.137105	0.113092	0.188241	-0.076531	0.374073	-0.47327	5.20866e-09
PAH	blue	0.0139483	0.871485	-0.0728814	0.397349	-0.0590215	0.493283	-0.023147	0.788328	-0.0731589	0.39555	0.0202044	0.814718	-0.00381881	0.964674	0.129009	0.132979	-0.383928	3.63303e-06	-0.109407	0.203135	-0.0245475	0.77585	-0.0879071	0.307028	-0.0279392	0.745873	0.684993	2.68394e-20	0.403189	1.03453e-06	-0.0915189	0.287501	0.0399275	0.643191	-0.0349154	0.685438	0.00937471	0.91342	0.079839	0.353713	-0.319796	0.000139335	-0.0242272	0.778699
DNASE1	blue	0.0471402	0.584372	-0.0602308	0.484453	-0.00971037	0.910333	0.145851	0.0890166	0.0314587	0.715163	0.0595663	0.489294	0.0751749	0.382623	0.116028	0.176953	-0.13611	0.112757	0.16594	0.0526303	0.113881	0.185157	0.282117	0.000837938	0.309245	0.000235986	0.453988	2.52032e-08	-0.00998122	0.907843	-0.0926542	0.281538	-0.0706978	0.411679	-0.128998	0.133011	-0.221614	0.00925201	-0.311969	0.000206354	-0.333969	6.65411e-05	-0.0285737	0.740305
SIDT2	blue	-0.105374	0.220391	-0.101641	0.237268	0.130222	0.129339	-0.0888042	0.302099	0.0165997	0.847329	0.108759	0.205842	0.0827692	0.336269	0.0995828	0.246951	-0.451348	3.10429e-08	-0.465264	1.01438e-08	0.147522	0.0853761	-0.0634937	0.461056	0.0239855	0.78085	0.427769	1.84964e-07	0.332768	7.09425e-05	-0.0939247	0.274964	0.445005	5.08489e-08	0.244732	0.00394869	0.323279	0.000116583	0.303394	0.000313451	0.038412	0.655853	-0.248006	0.00347756
ANKRD53	blue	-0.0442742	0.607448	-0.0274452	0.750216	0.107483	0.211245	-0.0889458	0.301326	0.0886982	0.302678	0.0162311	0.850679	-0.0452358	0.59966	0.0993024	0.248291	-0.280493	0.000900478	-0.40486	9.24255e-07	0.200659	0.0187179	0.0647261	0.452384	-0.281722	0.000852761	0.628888	1.89193e-16	0.412602	5.43775e-07	-0.119845	0.163037	0.320281	0.000135935	0.244047	0.00405417	0.266854	0.0016205	0.25384	0.00276171	0.0362721	0.673899	-0.583216	7.53604e-14
IMPA2	blue	-0.000834397	0.992279	0.0412842	0.631941	0.0934933	0.277184	-0.0132877	0.877523	0.0941289	0.273917	0.0729539	0.396879	0.0277018	0.747959	0.0954593	0.267163	-0.166246	0.0521903	0.293349	0.000503347	0.149284	0.0816683	0.144143	0.0928629	-0.0520241	0.546006	0.693963	5.39521e-21	0.131139	0.126642	-0.161372	0.0595828	-0.272287	0.00128694	-0.184147	0.0312326	-0.248597	0.00339808	-0.33952	4.93231e-05	-0.481827	2.50636e-09	0.179497	0.0358354
RAB3D	blue	-0.00401943	0.96282	0.198702	0.0199283	0.190258	0.0259546	-0.0477872	0.579218	0.0975074	0.256987	0.0968905	0.260024	0.046565	0.58897	0.131384	0.125927	0.0708468	0.410692	0.282882	0.000809876	0.0469634	0.585783	-0.0614938	0.475321	-0.169368	0.047866	0.480938	2.7067e-09	0.121919	0.155827	-0.147795	0.0847938	-0.365552	1.12068e-05	-0.178994	0.0363663	-0.238361	0.00503281	-0.254805	0.00265715	-0.337399	5.5339e-05	0.243961	0.00406762
ALB	blue	-0.143422	0.0945277	0.178237	0.0371769	0.00833732	0.92297	-0.0758358	0.378442	-0.0174011	0.840055	0.0286874	0.739308	0.0405553	0.637975	0.170663	0.0461619	-0.21247	0.0126795	-0.0189186	0.826317	0.13647	0.111801	0.0839402	0.329454	-0.0713825	0.407154	0.752195	3.17322e-26	0.242389	0.00432023	-0.0879833	0.306607	-0.0358768	0.677254	-0.0203464	0.81344	-0.0449338	0.602101	-0.0693633	0.420584	-0.259499	0.00219749	-0.170997	0.0457302
ARHGDIG	blue	0.0381345	0.658182	0.0701363	0.415412	0.105564	0.219556	-0.0670185	0.436499	0.0258872	0.763967	0.0140284	0.870754	0.0438209	0.611134	0.121629	0.156819	-0.19685	0.0211348	0.0543824	0.527933	0.258008	0.00233499	0.176985	0.0385524	-0.0373328	0.66493	0.719206	4.23678e-23	0.3154	0.000173951	-0.203086	0.0173063	-0.0595024	0.489761	-0.0849539	0.323625	-0.185103	0.0303513	-0.159367	0.0628639	-0.38483	3.43144e-06	-0.178252	0.037161
BNIP3	blue	-0.140259	0.102103	0.153405	0.0735001	0.0402866	0.640205	-0.0943154	0.272963	0.108193	0.208224	0.0707159	0.411559	-0.00153367	0.985809	0.144415	0.092242	-0.166984	0.0511399	-0.32091	0.000131641	0.0429141	0.618538	-0.156371	0.0680385	-0.254584	0.00268079	0.700539	1.60269e-21	0.487647	1.50628e-09	-0.165288	0.0535794	0.0943096	0.272993	0.104727	0.223257	0.184397	0.0309999	0.266801	0.00162411	0.034242	0.691193	-0.373295	7.03018e-06
DUOX2	blue	-0.0592975	0.49126	-0.0337852	0.695107	-0.09761	0.256485	-0.0625559	0.467716	-0.00318138	0.970568	0.129677	0.130966	0.139533	0.103909	-0.0491046	0.568791	-0.132072	0.12394	0.296695	0.000430698	-0.14357	0.0941831	0.055108	0.522434	0.252019	0.00296945	0.117967	0.169778	-0.1147	0.181996	-0.070709	0.411605	-0.267892	0.00155124	-0.149321	0.0815915	-0.187546	0.0281946	-0.231078	0.00659192	-0.292993	0.000511713	0.412409	5.51104e-07
C4A	blue	-0.0170815	0.842954	0.00747313	0.930933	-0.153998	0.0723798	-0.00898298	0.917025	0.0235084	0.785103	-0.0279967	0.745367	-0.0300958	0.727004	0.167307	0.050685	-0.232874	0.00617206	-0.267053	0.00160703	-0.0335762	0.6969	-0.154097	0.0721955	-0.202345	0.0177273	0.347486	3.17761e-05	0.347586	3.15977e-05	-0.146821	0.0868882	0.148507	0.0832885	0.230125	0.00682496	0.16134	0.0596338	0.278834	0.000968723	0.00487644	0.9549	-0.190696	0.0256071
EMID1	blue	0.0636032	0.460281	-0.103024	0.230916	-0.0255905	0.766594	-0.0620507	0.471325	0.00709834	0.934389	0.00583759	0.946023	-0.0517634	0.548022	0.0152056	0.860014	-0.380793	4.4243e-06	-0.310123	0.000226031	0.191452	0.025018	0.173017	0.0431943	-0.104283	0.225236	0.609178	2.82091e-15	0.421109	2.98923e-07	-0.136364	0.11208	0.31795	0.000153001	0.147908	0.0845524	0.16143	0.0594892	0.15965	0.0623912	-0.118825	0.166674	-0.482675	2.32837e-09
MLYCD	blue	0.0554019	0.520215	0.0236009	0.784278	0.160249	0.0614025	-0.0340384	0.692937	0.0718481	0.404093	0.0496776	0.564284	-0.0695427	0.419381	0.0427564	0.619829	-0.143321	0.0947629	0.0783324	0.362899	0.221281	0.00936073	0.133647	0.11948	-0.183304	0.0320282	0.524714	4.6529e-11	0.215255	0.0115338	-0.247155	0.00359489	-0.0655272	0.446796	-0.101935	0.235908	-0.0800031	0.352722	-0.176156	0.0394851	-0.353582	2.25132e-05	-0.078801	0.360026
MPV17L	blue	0.0431718	0.61643	0.0407671	0.63622	0.00437581	0.959526	-0.0382332	0.657353	0.0960022	0.264439	0.00914274	0.915555	-0.0056775	0.947501	0.110462	0.198787	-0.214896	0.0116762	-0.0280433	0.744958	0.107581	0.210827	-0.0222474	0.796372	-0.187139	0.0285446	0.705508	6.26542e-22	0.338743	5.14517e-05	-0.0298344	0.729282	-0.0658926	0.444261	-0.00472368	0.956311	-0.0423529	0.623139	-0.0163319	0.849763	-0.249658	0.00325954	-0.101334	0.238696
LINC00261	blue	0.0781626	0.363943	0.0225509	0.793656	0.0286615	0.739535	-0.0727851	0.397975	0.0214824	0.803229	0.022158	0.797173	-0.0853747	0.321226	0.0735699	0.392893	-0.432264	1.32991e-07	-0.0247703	0.77387	0.152453	0.0753262	-0.0745365	0.386688	-0.0293179	0.733792	0.70893	3.24348e-22	0.537581	1.25755e-11	-0.1506	0.0789844	-0.0437248	0.611917	-0.00342146	0.968348	-0.0992625	0.248482	-0.0168789	0.844793	-0.446393	4.56814e-08	0.0705238	0.412834
TMEM25	blue	0.0118711	0.890494	0.0683508	0.427415	-0.0640091	0.457418	0.0364329	0.672536	0.0515576	0.549616	0.0576378	0.50349	-0.0402821	0.640243	0.0180788	0.833914	-0.0697321	0.418112	-0.149948	0.080306	-0.0282173	0.74343	0.00519836	0.951926	-0.353869	2.21466e-05	0.411826	5.7384e-07	0.379989	4.65222e-06	-0.0188936	0.826543	0.012525	0.884503	-0.0152802	0.859334	0.0812365	0.345324	0.12893	0.133217	0.0319843	0.710615	-0.395075	1.77321e-06
CASTOR3	blue	-0.0292909	0.734028	-0.0510342	0.553682	-0.0821949	0.339644	-0.0175745	0.838482	0.0457387	0.595605	-0.0123005	0.886559	-0.0563598	0.513015	0.15063	0.0789234	-0.497014	6.50413e-10	-0.301765	0.000338864	0.0331875	0.70024	-0.0432376	0.615892	0.0463156	0.590969	0.752398	3.02503e-26	0.52201	6.08325e-11	-0.0588313	0.494679	0.254998	0.00263665	0.161115	0.0599945	0.14835	0.0836187	0.205022	0.0162468	-0.288142	0.000639155	-0.251354	0.00304874
SLC3A1	blue	0.00923627	0.914694	-0.0662967	0.441466	-0.0816212	0.343037	-0.045962	0.593809	-0.0375505	0.663095	-0.0176774	0.837549	-0.122444	0.15404	0.184567	0.0308427	-0.456805	2.01398e-08	-0.0552703	0.521208	-0.0357736	0.67813	-0.0691172	0.422239	0.0118716	0.890489	0.771793	2.51983e-28	0.395212	1.75738e-06	-0.118015	0.169602	-0.0125578	0.884202	0.0616678	0.474071	0.0374006	0.664359	0.0531026	0.537703	-0.324857	0.000107457	0.045413	0.59823
AL049839.2	blue	-0.0498504	0.562928	0.0108106	0.900223	-0.0171013	0.842774	-0.0782816	0.363211	-0.0289514	0.736997	0.0419008	0.626857	0.0916829	0.286634	0.0877385	0.307961	-0.0570726	0.507691	-0.0886727	0.302818	0.0389306	0.651509	0.0192826	0.82303	-0.177637	0.0378306	0.619477	7.03895e-16	0.224869	0.00824598	0.00859502	0.920597	-0.0131346	0.878923	0.0142407	0.868815	0.0796397	0.35492	-0.010388	0.904105	-0.209667	0.0139327	-0.251352	0.0030489
CFAP221	blue	-0.0636743	0.459779	0.0960052	0.264424	-0.0893072	0.299358	-0.0687313	0.42484	0.0346734	0.687504	0.0670033	0.436603	-0.0678093	0.431093	0.125388	0.144303	-0.302669	0.000324529	0.111539	0.194418	-0.0414332	0.630711	0.0288801	0.737621	0.108827	0.205556	0.584463	6.47879e-14	0.183464	0.0318756	-0.0610218	0.478723	-0.180069	0.0352403	-0.0863017	0.315981	-0.0392508	0.648832	-0.0860813	0.317223	-0.313894	0.000187546	0.0947665	0.270665
POMC	blue	-0.0593168	0.491119	-0.0901941	0.294565	0.126385	0.141116	-0.140859	0.100631	-0.040871	0.635359	0.0444479	0.606038	0.10893	0.205124	0.0639127	0.458097	-0.257381	0.0023951	-0.197908	0.0204381	0.216666	0.0109885	0.276459	0.00107474	0.0325398	0.705818	0.413413	5.1401e-07	0.250365	0.00317013	-0.124612	0.146825	0.248264	0.00344267	0.0154113	0.85814	0.173873	0.0421548	0.0395025	0.646732	-0.125085	0.145282	-0.443466	5.72298e-08
PCSK7	blue	0.111975	0.192669	-0.0923149	0.283311	0.0614484	0.475648	0.0139717	0.871271	-0.0684809	0.426533	0.172147	0.0442716	0.199521	0.0194137	-0.0611918	0.477496	0.0175817	0.838417	0.0991077	0.249224	-0.228284	0.00729573	-0.186167	0.0293951	0.148005	0.0843473	-0.39611	1.65673e-06	-0.320039	0.000137621	-0.00849077	0.921557	-0.109096	0.20443	-0.0743051	0.388168	-0.0318704	0.711599	0.0507857	0.555616	0.13354	0.119779	0.478062	3.46664e-09
RPH3AL	blue	-0.135035	0.115656	0.0143072	0.868207	0.110049	0.200482	-0.0309783	0.719329	-0.00754164	0.930302	-0.0571584	0.507052	-0.0968632	0.260159	-0.0829916	0.334968	-0.328433	8.91962e-05	-0.013843	0.872447	0.208679	0.014399	0.117062	0.1731	0.000451522	0.995822	0.587038	4.73216e-14	0.691423	8.54817e-21	-0.253044	0.00285087	-0.0152122	0.859954	-0.0605358	0.482239	-0.106839	0.214009	-0.0507715	0.555727	-0.427319	1.91123e-07	-0.213722	0.0121526
NOMO1	blue	-0.0211605	0.80612	0.163633	0.0560526	0.105732	0.21882	0.00523638	0.951575	0.192837	0.0239674	0.0346004	0.688128	0.0206693	0.810535	0.0458527	0.594688	0.121785	0.156284	-0.0486414	0.572448	-0.0127961	0.88202	-0.165902	0.0526853	-0.477963	3.49607e-09	0.441827	6.48702e-08	0.243575	0.00412849	-0.0108447	0.899911	-0.164117	0.0553198	-0.00295748	0.972638	0.0966681	0.261124	0.0758503	0.37835	0.0813117	0.344876	-0.134133	0.11813
PTF1A	blue	-0.0735763	0.392852	0.0698729	0.41717	0.118807	0.166739	-0.109924	0.200995	0.0109331	0.899098	0.0166826	0.846576	-0.0185155	0.829962	0.114407	0.183123	-0.262606	0.00193413	-0.158829	0.0637684	0.163138	0.0568098	-0.0464038	0.590262	-0.136752	0.111056	0.916382	1.57019e-55	0.378576	5.07977e-06	-0.135364	0.114762	0.0579288	0.501334	0.0387693	0.652859	0.059193	0.492025	0.0458275	0.594891	-0.261074	0.00206016	-0.193065	0.0237981
TRPV6	blue	-0.06681	0.43793	-0.0126489	0.883368	-0.066412	0.44067	0.0316095	0.713857	0.022337	0.79557	-0.0244588	0.776638	-0.064654	0.452889	0.168831	0.048588	-0.306467	0.000270232	0.036942	0.668229	0.0339637	0.693577	0.120879	0.159411	0.0646896	0.452639	0.7948	4.48724e-31	0.294384	0.000479757	-0.0623563	0.46914	-0.0890878	0.300551	-0.0967458	0.260739	-0.0279124	0.746107	-0.0961297	0.263802	-0.367857	9.76644e-06	-0.0859789	0.3178
MIR217HG	blue	-0.0989808	0.249833	0.148103	0.0841391	0.149286	0.081665	-0.0917136	0.286472	0.0336761	0.696043	-0.0207348	0.809945	-0.0390658	0.650378	0.108893	0.20528	-0.171779	0.0447345	-0.0940648	0.274245	0.249788	0.00324294	0.0340137	0.693148	-0.136488	0.111753	0.843045	3.52578e-38	0.318335	0.000150056	-0.178582	0.036806	0.0218862	0.799608	0.00738929	0.931706	-0.0134145	0.876363	-0.0200247	0.816337	-0.253023	0.00285321	-0.248466	0.00341561
PNLIPRP1	blue	-0.0710099	0.409613	0.0375135	0.663407	0.0695903	0.419062	-0.119624	0.163818	-0.0162267	0.850719	-0.00445312	0.958811	-0.0423575	0.623101	0.150154	0.0798854	-0.279318	0.000948359	-0.149563	0.0810946	0.0856259	0.319799	-0.0704878	0.413073	-0.132434	0.122905	0.92933	2.85532e-60	0.37575	6.04881e-06	-0.0736159	0.392596	0.0411379	0.633151	0.0377871	0.661103	0.0900545	0.295316	0.0618083	0.473062	-0.271128	0.00135234	-0.148686	0.0829129
ECI2	blue	-0.055068	0.522736	0.00587735	0.945656	0.0834149	0.3325	-0.125322	0.144517	-0.0829539	0.335188	0.0103034	0.904882	-0.00508667	0.952958	-0.033552	0.697108	-0.430028	1.56798e-07	-0.116868	0.173817	0.22636	0.00781827	0.033935	0.693822	-0.0331114	0.700895	0.530005	2.73526e-11	0.317302	0.000158089	-0.167929	0.0498208	0.12846	0.13465	0.0119741	0.889549	0.0386561	0.653807	0.033458	0.697915	-0.305247	0.000286687	-0.0541814	0.529461
KIRREL2	blue	-0.0872248	0.310812	0.0593477	0.490893	0.178043	0.0373877	-0.120978	0.159069	0.0214461	0.803555	-0.053633	0.533643	-0.0768675	0.37197	0.100917	0.240645	-0.355012	2.07426e-05	-0.245734	0.00379873	0.100708	0.241624	-0.0649911	0.450531	-0.128499	0.134532	0.792566	8.59113e-31	0.637689	5.31468e-17	-0.146877	0.0867668	0.140212	0.10222	0.173526	0.0425735	0.115407	0.179297	0.138663	0.106105	-0.250435	0.00316134	-0.235702	0.00555904
CTRB2	blue	-0.0361472	0.674958	-0.00568832	0.947401	0.0419644	0.626333	-0.0916175	0.28698	-0.0386557	0.65381	0.017726	0.837109	-0.035199	0.68302	0.163445	0.0563389	-0.253837	0.00276213	-0.121017	0.158931	0.00615121	0.943128	-0.053445	0.53508	-0.133685	0.119373	0.864507	3.6783e-42	0.336835	5.70522e-05	-0.0413174	0.631667	0.0171391	0.842431	0.0544704	0.527264	0.0939646	0.274759	0.0623736	0.469016	-0.226019	0.00791441	-0.13466	0.116678
CELA2B	blue	-0.0450806	0.600914	0.0336137	0.696579	0.0629467	0.464934	-0.112165	0.191911	-0.0378782	0.660336	-0.00157599	0.985418	-0.0650009	0.450463	0.140754	0.100887	-0.278274	0.00099284	-0.121533	0.157151	0.0648753	0.451341	-0.0650223	0.450314	-0.151686	0.0768225	0.896358	1.55215e-49	0.3641	1.22145e-05	-0.0724382	0.400233	0.0280407	0.744981	0.0285317	0.740673	0.0703312	0.414114	0.0499254	0.56234	-0.259323	0.00221325	-0.115811	0.17777
KLK1	blue	-0.0524932	0.542386	0.0653009	0.448371	0.104888	0.222541	-0.106104	0.217193	-0.0323325	0.707607	0.0299138	0.72859	-0.0320878	0.709719	0.111768	0.193497	-0.184744	0.03068	0.0487302	0.571745	0.196032	0.0216873	0.0435381	0.613439	-0.106544	0.215281	0.86585	1.96826e-42	0.244256	0.0040217	-0.0774375	0.368424	-0.0751061	0.38306	-0.0626826	0.466813	-0.0822609	0.339255	-0.153795	0.072762	-0.393457	1.9709e-06	-0.0254604	0.767746
GRB14	blue	-0.0915994	0.287075	0.0286661	0.739495	0.043162	0.61651	-0.0827143	0.336591	0.0659735	0.443701	-0.0200125	0.816447	-0.0914815	0.287698	0.162629	0.0575987	-0.30874	0.000241892	-0.0774334	0.368449	0.192239	0.0244161	0.0953848	0.267538	0.0246335	0.775086	0.853035	5.9274e-40	0.432111	1.34494e-07	-0.144523	0.0919972	-0.00219637	0.979678	-0.0916608	0.286751	-0.0143164	0.868124	-0.0216732	0.801518	-0.39862	1.4037e-06	-0.2362	0.00545682
CHST4	blue	-0.0607165	0.48093	-0.0141694	0.869466	-0.0898213	0.296573	-0.0197032	0.819235	-0.0155803	0.856601	0.00698233	0.935459	-0.0559123	0.516372	0.0579224	0.501382	-0.258544	0.00228467	0.156168	0.0684022	-0.134171	0.118025	-0.0276581	0.748343	0.0291576	0.735193	0.486614	1.64981e-09	0.11553	0.178833	-0.0754882	0.380637	-0.187463	0.0282661	-0.0742825	0.388313	-0.0757846	0.378764	-0.0694763	0.419825	-0.27699	0.00105014	0.209219	0.0141425
PHYHD1	blue	-0.0680966	0.429139	0.0976792	0.256146	0.0628588	0.465559	0.0209598	0.807923	0.0317563	0.712586	0.0667687	0.438214	0.0720366	0.402858	0.193507	0.023473	-0.100687	0.241723	0.0661659	0.44237	0.231484	0.00649478	0.279816	0.000927767	0.109741	0.201753	0.420531	3.11482e-07	0.120073	0.162231	-0.137156	0.109993	-0.0140876	0.870213	-0.19814	0.0202878	-0.0742778	0.388343	-0.115226	0.179985	-0.177796	0.0376565	-0.317567	0.000155989
MT1E	blue	-0.0566987	0.51048	0.044602	0.604788	0.118457	0.167998	-0.0178389	0.836086	0.061073	0.478354	0.00361706	0.966539	0.0271065	0.753199	0.136171	0.112595	0.0388674	0.652038	-0.0941021	0.274054	0.173642	0.0424336	0.171886	0.0445992	-0.183987	0.0313827	0.402044	1.11723e-06	0.226755	0.0077085	0.0660814	0.442954	0.0488329	0.570934	-0.0289612	0.736911	0.0694119	0.420258	-0.0643694	0.454885	-0.11382	0.185393	-0.389801	2.49787e-06
LAPTM4B	blue	0.0278518	0.74664	0.0752936	0.38187	-0.113042	0.188436	-0.0872863	0.31047	0.0410967	0.633492	-0.0405962	0.637636	-0.095104	0.268955	0.0843506	0.327086	0.0501294	0.560742	0.166899	0.0512599	-0.0355881	0.679707	-0.201797	0.0180438	-0.198253	0.0202152	0.378936	4.96737e-06	0.229745	0.00691978	-0.0569696	0.508459	-0.312488	0.000201119	-0.164457	0.0548098	-0.239921	0.00474515	-0.0518456	0.547386	-0.22356	0.00863809	0.151034	0.0781157
TTLL7	blue	0.0211139	0.806538	-0.0219224	0.799283	-0.156593	0.0676446	-0.0501563	0.560532	0.0103199	0.90473	-0.000297794	0.997244	-0.064448	0.454333	0.044138	0.608554	-0.461446	1.38564e-08	-0.365163	1.14686e-05	-0.20699	0.0152283	-0.38298	3.85689e-06	-0.0678733	0.430658	0.529995	2.73781e-11	0.574389	2.15752e-13	-0.141424	0.0992591	0.112421	0.19089	0.0788145	0.359943	0.168316	0.0492885	0.486429	1.6769e-09	-0.000466969	0.995679	-0.0489691	0.56986
KCNJ16	blue	-0.0206494	0.810713	-0.00764461	0.929353	-0.0657596	0.445183	-0.0428911	0.618726	0.00841088	0.922292	-0.024092	0.779902	-0.130986	0.127088	0.166312	0.052095	-0.386137	3.15823e-06	-0.141629	0.0987643	-0.0392229	0.649065	-0.0623456	0.469216	-0.0261544	0.761603	0.843767	2.65063e-38	0.473724	5.01298e-09	-0.0489324	0.570149	0.0339965	0.693296	0.0549919	0.523311	0.0774105	0.368591	0.0891452	0.300239	-0.313224	0.000193907	-0.100564	0.2423
AZIN1-AS1	blue	-0.00623378	0.942366	0.221767	0.00920222	0.0785217	0.361736	-0.0723055	0.4011	0.0194423	0.821588	-0.0655692	0.446504	-0.0236108	0.78419	0.0695138	0.419574	0.0366691	0.670537	0.0415096	0.630081	0.241792	0.00441979	0.0737116	0.39198	-0.226944	0.00765627	0.602212	7.01254e-15	0.208992	0.0142496	-0.160457	0.0610625	-0.0965628	0.261646	-0.152262	0.0756952	-0.105823	0.21842	-0.143615	0.0940808	-0.223933	0.00852479	-0.250177	0.00319375
TMEM220	blue	0.0592758	0.491419	-0.181162	0.0341264	-0.0186922	0.828364	-0.0718029	0.40439	-0.189873	0.0262627	0.0476345	0.580433	0.0351627	0.683329	0.0644652	0.454213	-0.496042	7.10472e-10	-0.166568	0.0517293	0.117192	0.172621	-0.0973205	0.257904	0.0206723	0.810508	0.480393	2.83713e-09	0.260696	0.00209235	-0.27137	0.00133839	0.159446	0.0627313	0.101667	0.237151	-0.00671145	0.937958	0.126917	0.139436	-0.255022	0.00263411	0.0409783	0.634471
MT1H	blue	-0.00452765	0.958123	0.0812796	0.345068	0.0737043	0.392027	-0.0528301	0.539795	0.0613748	0.476178	0.0631491	0.463497	0.0222442	0.796401	0.125251	0.144747	-0.170168	0.0468068	-0.135241	0.115096	0.0912009	0.289186	0.0257465	0.765212	-0.233415	0.00605021	0.755855	1.33157e-26	0.300294	0.000363445	0.0143449	0.867863	0.0576561	0.503354	0.0127516	0.882428	0.178743	0.0366339	0.00853662	0.921134	-0.181179	0.034109	-0.204242	0.0166665
ERP27	blue	-0.10295	0.23125	0.0848259	0.324358	0.0538408	0.532057	-0.118251	0.168747	0.00619107	0.94276	-0.00846242	0.921818	-0.0165114	0.848131	0.192214	0.0244347	-0.213665	0.0121764	-0.143306	0.0947977	0.167717	0.0501135	-0.021688	0.801384	-0.11329	0.187463	0.923208	6.31851e-58	0.376654	5.72114e-06	-0.0942969	0.273058	0.0553058	0.52094	0.0390645	0.650389	0.0410064	0.634238	0.00920625	0.91497	-0.302453	0.000327911	-0.229184	0.00706194
ZNF710-AS1	blue	0.0805667	0.349329	-0.112838	0.18924	0.0329628	0.702173	-0.0699529	0.416636	0.0168939	0.844657	-0.0866089	0.314254	-0.0387993	0.652608	0.0473907	0.582373	-0.384505	3.50283e-06	-0.348863	2.94144e-05	0.185272	0.0301976	0.12377	0.149596	0.0762783	0.375658	0.480769	2.74662e-09	0.280323	0.000907238	-0.313599	0.000190321	0.353702	2.23595e-05	0.144538	0.0919629	0.134719	0.116516	0.254528	0.00268677	-0.00766691	0.929147	-0.469958	6.87679e-09
F11	blue	-0.0335279	0.697315	0.0115157	0.893753	-0.0181879	0.832925	-0.0486152	0.572654	0.0195714	0.820424	0.0491316	0.568579	-0.006398	0.94085	0.182366	0.0329329	-0.402093	1.11354e-06	-0.170226	0.0467315	0.0394495	0.647173	-0.0691044	0.422325	-0.0721937	0.40183	0.937087	1.45e-63	0.53923	1.05914e-11	-0.1416	0.0988359	0.0542402	0.529014	0.0708218	0.410857	0.0405566	0.637964	0.0846238	0.325516	-0.339547	4.92526e-05	-0.133483	0.119939
HLA-A	blue	-0.0355935	0.679661	-0.0783043	0.363072	0.0884742	0.303906	-0.05641	0.512639	0.0233795	0.786253	-0.0855445	0.320261	-0.0379281	0.659917	-0.0186058	0.829144	0.210799	0.0134142	0.0991217	0.249157	-0.273453	0.00122407	0.250258	0.00318356	0.117655	0.170918	-0.377789	5.33374e-06	-0.256188	0.00251335	0.438657	8.2498e-08	0.0057621	0.94672	-0.052382	0.543244	0.0835846	0.331514	-0.177897	0.0375462	0.0790622	0.358431	-0.00385541	0.964336
NTRK2	blue	0.0763269	0.375352	-0.0871561	0.311195	-0.0635758	0.460475	-0.0881464	0.305708	-0.061943	0.472097	0.018226	0.83258	-0.102356	0.23397	0.0694604	0.419932	-0.542724	7.33843e-12	-0.556185	1.71484e-12	0.0603986	0.483234	-0.341067	4.53281e-05	-0.20817	0.0146447	0.617545	9.16748e-16	0.658524	2.22028e-18	-0.126766	0.139911	0.427162	1.93316e-07	0.363909	1.23535e-05	0.306951	0.000263951	0.48721	1.56541e-09	-0.0927126	0.281233	-0.24237	0.00432335
SEC61B	blue	-0.133785	0.119096	-0.00344933	0.96809	0.230684	0.00668738	-0.0889488	0.301309	-0.0785093	0.361812	-0.13769	0.108603	-0.103527	0.228633	0.01349	0.875673	-0.0921817	0.284009	-0.120756	0.159839	0.378319	5.1612e-06	0.312943	0.000196625	-0.118189	0.168971	0.476746	3.87898e-09	0.238446	0.00501675	-0.190941	0.0254154	0.167481	0.0504426	-0.0140242	0.870792	0.00868796	0.919741	-0.088	0.306515	-0.1423	0.097162	-0.512957	1.46722e-10
REG1A	blue	0.019326	0.822638	0.0402898	0.640179	0.0168341	0.8452	-0.118118	0.169228	-0.0702268	0.414809	0.0460098	0.593425	-0.0181957	0.832855	0.168667	0.0488103	-0.287493	0.000658269	-0.0544159	0.527678	0.00597131	0.944789	-0.0266813	0.756948	-0.0733951	0.394022	0.81078	3.36254e-33	0.304484	0.000297431	-0.0776232	0.367273	-0.0439148	0.61037	0.0551879	0.52183	0.0212149	0.805631	0.00853675	0.921133	-0.271997	0.00130301	-0.0594262	0.490318
FOLR1	blue	-0.0153932	0.858305	0.0819531	0.341072	0.0509816	0.55409	0.00835241	0.922831	0.0234139	0.785946	0.00922431	0.914804	-0.11962	0.163834	0.180992	0.034297	-0.265931	0.00168442	-0.0167827	0.845666	0.0876708	0.308335	0.102432	0.233619	0.0774556	0.368312	0.40899	6.97622e-07	0.234651	0.00578009	-0.0764855	0.374358	0.0197258	0.819031	-0.0561705	0.514433	-0.0535832	0.534023	0.00896864	0.917157	-0.242648	0.00427769	-0.157079	0.066786
SLC41A1	blue	0.0339365	0.69381	0.0490622	0.569126	-0.0274304	0.750346	-0.157544	0.0659723	-0.0540757	0.530266	0.0648252	0.451691	0.0492255	0.567839	0.0630323	0.464326	-0.357051	1.84454e-05	-0.359563	1.59432e-05	-0.00408898	0.962177	-0.402468	1.0859e-06	-0.154494	0.0714554	0.559802	1.14732e-12	0.462671	1.2542e-08	-0.141145	0.0999351	0.154806	0.0708775	0.196165	0.0215967	0.168971	0.0483984	0.366795	1.04069e-05	-0.044124	0.608668	0.0025545	0.976366
ALKAL2	blue	-0.0223681	0.795292	-0.00974314	0.910032	0.00531619	0.950838	-0.0352863	0.682277	0.0147942	0.863764	-0.0840538	0.328797	-0.151678	0.0768397	0.130226	0.129329	-0.365625	1.11585e-05	-0.148886	0.0824942	0.128887	0.133347	0.0147675	0.864008	-0.00451348	0.958254	0.848027	4.76751e-39	0.497833	6.03649e-10	-0.132167	0.123666	0.0844911	0.326278	0.0210725	0.80691	0.06121	0.477365	0.0380638	0.658776	-0.384074	3.59963e-06	-0.217213	0.0107837
CFTR	blue	-0.0101341	0.906438	-0.00161618	0.985046	-0.115433	0.179201	-0.108991	0.204869	-0.049378	0.566639	0.0230596	0.789109	-0.0943927	0.272568	0.169789	0.0473066	-0.466353	9.27394e-09	-0.0901644	0.294724	-0.0897928	0.296727	-0.0914411	0.287913	0.026668	0.757066	0.771448	2.7554e-28	0.41321	5.21312e-07	-0.0933008	0.278179	0.00357543	0.966924	0.102867	0.231628	0.0358117	0.677807	0.0871575	0.311187	-0.320809	0.000132321	0.0619781	0.471845
SLC30A2	blue	-0.0733937	0.394031	0.0790685	0.358393	0.0835799	0.331541	-0.054565	0.526546	0.00930966	0.914019	-0.0381135	0.658358	-0.0548684	0.524246	0.147943	0.0844798	-0.319972	0.000138092	-0.166004	0.0525383	0.0622667	0.46978	-0.0270739	0.753486	-0.120864	0.159463	0.91341	1.49926e-54	0.417921	3.748e-07	-0.100324	0.243433	0.0645807	0.453402	0.101522	0.237824	0.0958737	0.265082	0.0841944	0.327986	-0.251345	0.00304976	-0.21611	0.0112008
SLC39A5	blue	-0.0453122	0.599044	0.045019	0.601412	0.0483504	0.57475	-0.0382754	0.656999	-0.00652237	0.939703	-0.00847723	0.921681	-0.0287517	0.738746	0.182039	0.0332529	-0.297212	0.000420384	0.180885	0.0344054	0.210553	0.0135252	0.165748	0.0529091	0.177121	0.0384003	0.66883	4.19847e-19	0.18838	0.0274891	-0.193985	0.0231254	-0.125186	0.144957	-0.152754	0.0747435	-0.224819	0.00826069	-0.246995	0.00361736	-0.484983	1.90386e-09	0.122163	0.154994
SERPINA3	blue	-0.0504373	0.558335	-0.0312069	0.717345	-0.100967	0.240409	-0.073305	0.394604	-0.00843103	0.922107	-0.00548579	0.949271	-0.0203151	0.813722	0.164954	0.0540717	-0.103625	0.228189	0.0621216	0.470817	-0.00494432	0.954273	0.17575	0.0399494	0.209442	0.0140378	0.554495	2.06548e-12	0.0790184	0.358698	-0.0568748	0.509166	-0.131448	0.125741	-0.128758	0.133741	-0.0351692	0.683274	-0.12064	0.160246	-0.254095	0.00273377	-0.130921	0.127279
IFT20	blue	-0.0694547	0.419971	0.0484779	0.573741	0.0452221	0.599771	-0.0670169	0.43651	0.00456252	0.957801	0.0588802	0.494321	0.0609129	0.479509	0.112036	0.192424	-0.159414	0.062784	0.123532	0.150387	0.318716	0.000147183	0.420906	3.03288e-07	0.203965	0.0168182	0.606381	4.07718e-15	0.151854	0.0764927	-0.21555	0.0114178	-0.0431825	0.616343	-0.237447	0.00520847	-0.221069	0.00943045	-0.241523	0.00446532	-0.308116	0.000249387	-0.348244	3.04547e-05
TPST2	blue	-0.123639	0.15003	0.0600703	0.48562	0.125533	0.143838	-0.142051	0.0977551	0.0580793	0.500221	0.0165181	0.848071	-0.0442821	0.607384	0.0806416	0.34888	-0.131415	0.125837	-0.200385	0.0188835	0.206169	0.0156464	0.0974046	0.257491	-0.196065	0.0216652	0.764744	1.51428e-27	0.291403	0.000550653	-0.127212	0.138509	0.11532	0.179628	0.0619848	0.471797	0.150878	0.0784258	0.0592481	0.491622	-0.0379871	0.659421	-0.413915	4.9635e-07
LRMDA	blue	0.0245026	0.776249	-0.0277384	0.747637	0.0977884	0.255612	-0.0290904	0.735781	0.0180392	0.834272	-0.0578581	0.501858	-0.103675	0.227963	0.0307025	0.721725	-0.185431	0.0300542	-0.111711	0.193725	0.256422	0.00248978	0.249264	0.00331041	-0.235437	0.00561394	0.400482	1.24026e-06	0.23299	0.0061457	-0.0992187	0.248692	0.124339	0.147718	-0.0361554	0.674889	0.168293	0.0493197	-0.0543001	0.528558	-0.157304	0.0663909	-0.430038	1.56675e-07
UBA5	blue	-0.126449	0.140912	0.151821	0.0765584	0.109622	0.202245	0.0223445	0.795503	0.161255	0.0597698	-0.0691488	0.422026	-0.0169023	0.844581	0.00846622	0.921783	0.0252786	0.769359	0.0260314	0.762691	0.264503	0.00178786	-0.0532266	0.536752	0.10627	0.21647	0.378099	5.23202e-06	0.292571	0.000521798	-0.164651	0.0545201	-0.126621	0.140367	-0.159795	0.0621502	-0.147082	0.0863244	-0.0506739	0.556488	-0.206911	0.0152681	-0.107636	0.21059
SLC39A8	blue	-0.0445867	0.604912	0.141089	0.100071	0.206697	0.0153767	-0.135875	0.113385	0.0564414	0.512404	-0.0101089	0.906669	0.0419587	0.62638	0.0616977	0.473856	0.0484097	0.574281	-0.39797	1.46542e-06	0.130999	0.12705	-0.20739	0.0150284	-0.369731	8.72621e-06	0.472645	5.4903e-09	0.271141	0.00135158	-0.0576318	0.503535	0.198341	0.0201585	0.227776	0.0074305	0.291813	0.000540363	0.286387	0.000692058	0.168977	0.0483902	-0.408289	7.31944e-07
HAAO	blue	0.00286737	0.973472	-0.0910618	0.289925	0.0792942	0.357018	-0.123224	0.151414	-0.102079	0.235245	0.0719415	0.403481	0.00566115	0.947652	0.149783	0.0806431	-0.4302	1.54828e-07	-0.521346	6.49504e-11	0.142045	0.0977693	0.0168463	0.845089	-0.251208	0.00306631	0.584149	6.73021e-14	0.480689	2.76563e-09	-0.057609	0.503704	0.480152	2.89686e-09	0.355439	2.02407e-05	0.41507	4.57913e-07	0.308768	0.000241565	-0.00864567	0.92013	-0.499704	5.08617e-10
PDIA2	blue	-0.0214902	0.80316	0.0987754	0.250823	0.0980327	0.254421	-0.0958014	0.265444	0.00499715	0.953785	-0.023327	0.786722	-0.0345415	0.688631	0.136532	0.111635	-0.219834	0.00984659	-0.0181043	0.833682	0.138255	0.107145	0.0419631	0.626343	-0.0701767	0.415143	0.875943	1.42655e-44	0.311701	0.000209108	-0.0651841	0.449184	-0.0420048	0.626001	-0.0210295	0.807296	-0.0608632	0.479868	-0.0728422	0.397604	-0.346536	3.35079e-05	-0.119013	0.165998
AGT	blue	0.0497533	0.56369	-0.038269	0.657053	-0.106097	0.217225	-0.0407812	0.636103	-0.151905	0.0763924	-0.0908692	0.290951	-0.0717489	0.404744	-0.00275272	0.974532	-0.334474	6.477e-05	-0.162531	0.0577511	-0.0914844	0.287683	-0.0879701	0.30668	-0.128503	0.134519	0.328254	9.00354e-05	0.344453	3.76187e-05	-0.193717	0.0233198	0.101126	0.239665	0.114014	0.184642	0.0908647	0.290975	0.233189	0.00610076	-0.0827492	0.336386	-0.118406	0.168183
CYP4V2	blue	0.00913676	0.91561	0.042441	0.622416	-0.139132	0.104917	-0.143294	0.0948244	0.00583219	0.946073	0.0275572	0.749231	-0.0785799	0.36138	0.12885	0.133461	-0.406919	8.03675e-07	-0.130232	0.129312	-0.143775	0.0937109	-0.192314	0.0243598	-0.0539218	0.531439	0.619163	7.34878e-16	0.466146	9.43371e-09	0.0352899	0.682246	0.024355	0.777561	0.0643334	0.455138	0.0160846	0.852011	0.0826772	0.336808	-0.370282	8.44079e-06	0.0825896	0.337322
CCDC198	blue	-0.0633062	0.462383	0.0578474	0.501937	-0.108957	0.205012	-0.032011	0.710384	-0.0529969	0.538514	-0.0510484	0.553571	-0.0792315	0.3574	0.0982526	0.253352	-0.272077	0.00129854	0.24098	0.00455842	0.00603901	0.944164	0.1321	0.12386	0.270103	0.00141265	0.505499	2.9727e-10	0.156158	0.0684196	-0.102014	0.235542	-0.24326	0.00417863	-0.25442	0.00269843	-0.202427	0.0176799	-0.212555	0.0126433	-0.416906	4.02573e-07	0.156125	0.0684787
VASH1-AS1	blue	-0.0270266	0.753903	-0.144737	0.091512	0.174981	0.0408408	-0.17866	0.0367227	-0.0776521	0.367095	0.0469498	0.585892	0.0373509	0.664777	0.0474215	0.582128	-0.352749	2.36086e-05	-0.190029	0.0261381	0.117878	0.170105	0.191784	0.0247621	0.205545	0.0159707	0.454855	2.35277e-08	0.389213	2.59417e-06	-0.130008	0.129977	0.205123	0.0161933	0.0294141	0.732951	0.0692301	0.421479	0.0407893	0.636036	-0.256125	0.0025198	-0.322792	0.000119538
SARDH	blue	-0.129976	0.130071	0.0163343	0.849741	0.132229	0.123489	-0.137052	0.110267	0.0814031	0.344332	0.0329201	0.702541	-0.0753637	0.381426	0.0117928	0.891211	-0.245686	0.00380587	-0.373205	7.06875e-06	0.170924	0.045825	-0.0199358	0.817138	-0.25651	0.00248095	0.612287	1.86496e-15	0.501744	4.21478e-10	-0.11615	0.176497	0.298418	0.000397192	0.244483	0.00398674	0.239766	0.00477316	0.221661	0.00923666	0.0241617	0.779282	-0.420149	3.20082e-07
TMEM97	blue	-0.0764157	0.374796	0.13797	0.10788	0.151694	0.0768066	-0.120053	0.162304	0.0372593	0.66555	0.0462077	0.591835	-0.00736185	0.931959	0.168601	0.0488995	-0.0468521	0.586673	0.183033	0.0322869	0.184313	0.031078	-0.0171099	0.842696	-0.0934113	0.277608	0.742863	2.71581e-25	0.223678	0.00860224	-0.131832	0.124631	-0.236065	0.00548442	-0.0980982	0.254102	-0.17881	0.0365626	-0.235784	0.00554199	-0.441298	6.75348e-08	0.123153	0.151651
CPB1	blue	-0.03992	0.643253	0.0175136	0.839035	0.045683	0.596054	-0.0890814	0.300586	-0.0305007	0.723479	0.0148025	0.863689	-0.0473864	0.582408	0.155298	0.0699745	-0.2606	0.00210069	-0.141393	0.0993338	0.00828837	0.923421	-0.113575	0.186348	-0.169606	0.0475489	0.868707	5.08547e-43	0.368185	9.57631e-06	-0.0526979	0.540811	0.0222275	0.79655	0.0690366	0.422781	0.103572	0.228429	0.0911182	0.289626	-0.222595	0.00893772	-0.103602	0.228293
CRP	blue	-0.0226517	0.792754	0.0660231	0.443357	-0.0493242	0.567062	0.094736	0.27082	-0.0015176	0.985958	-0.00117672	0.989112	-0.0175241	0.838939	0.101961	0.235787	-0.164881	0.0541796	0.0904141	0.293384	0.00301281	0.972127	0.084132	0.328346	0.102265	0.234388	0.519424	7.84375e-11	0.188792	0.0271456	-0.0889398	0.301358	-0.146871	0.0867809	-0.0727366	0.39829	-0.115347	0.179526	-0.103481	0.228842	-0.283267	0.000796096	-0.0442736	0.607452
TBC1D24	blue	-0.0128003	0.881982	0.0529543	0.538841	0.0932577	0.278402	0.0850745	0.322937	0.183892	0.0314717	0.0498549	0.562893	-0.0606839	0.481166	0.0764737	0.374432	-0.190974	0.0253891	0.0565313	0.511731	0.0954791	0.267063	0.212122	0.0128299	-0.0371384	0.666571	0.576087	1.7666e-13	0.391925	2.1774e-06	-0.145394	0.0900344	-0.122	0.155549	-0.163257	0.0566268	-0.0527888	0.540112	-0.116122	0.1766	-0.224772	0.0082744	-0.211892	0.0129298
DAPL1	blue	0.00299607	0.972282	-0.0568584	0.509288	0.0433972	0.614589	0.017155	0.842287	0.156998	0.0669289	-0.0217005	0.801272	-0.102344	0.234025	0.0542374	0.529035	-0.319291	0.000142957	-0.167673	0.050175	0.204766	0.0163838	0.0507326	0.55603	-0.0994907	0.24739	0.659248	1.97923e-18	0.629392	1.76131e-16	-0.0987846	0.250778	0.136164	0.112614	0.0662816	0.44157	0.0720085	0.403042	0.0304847	0.723618	-0.378091	5.23486e-06	-0.27615	0.00108925
MT1M	blue	-0.0723174	0.401022	-0.101878	0.236173	0.0463054	0.591052	-0.0690292	0.422831	-0.0387283	0.653202	0.0410357	0.633996	0.00497889	0.953953	0.0727395	0.398271	-0.307475	0.000257306	-0.365086	1.15215e-05	0.22965	0.00694359	0.108112	0.208569	-0.0743503	0.387879	0.379517	4.79095e-06	0.431392	1.41825e-07	-0.0369255	0.668369	0.418369	3.63126e-07	0.136132	0.112698	0.15296	0.0743479	0.151401	0.0773856	-0.194033	0.0230911	-0.451154	3.15192e-08
IGFBP2	blue	0.0948126	0.270432	-0.0386333	0.653998	0.0467555	0.587446	-0.0477206	0.579748	-0.0391675	0.649528	0.00539548	0.950105	-0.0590524	0.493056	-0.0907861	0.291394	-0.0659353	0.443965	0.127685	0.137037	-0.0301476	0.726553	0.174488	0.0414213	-0.122542	0.153709	0.439785	7.57567e-08	0.189037	0.0269438	-0.188946	0.0270182	-0.125588	0.143659	-0.0924348	0.282684	-0.0704405	0.413387	-0.175093	0.0407105	-0.224943	0.00822421	-0.0283243	0.742492
PLA2G12A	blue	-0.118447	0.168038	0.140682	0.101064	0.00812685	0.924909	-0.157241	0.0665018	0.0671331	0.435713	0.0639145	0.458085	-0.0814828	0.343859	0.0238437	0.782113	-0.257883	0.00234686	-0.202728	0.0175084	0.0491297	0.568594	-0.44099	6.91334e-08	-0.235393	0.0056232	0.561276	9.72682e-13	0.50551	2.96975e-10	-0.246094	0.00374613	-0.0993353	0.248133	-0.0149031	0.862771	0.0261614	0.761541	0.296256	0.000439651	-0.0703828	0.413771	0.0428874	0.618757
C4B	blue	-0.00282263	0.973886	0.00629688	0.941783	-0.0388975	0.651786	-0.0108623	0.899749	0.012002	0.889294	0.000620267	0.99426	0.0539126	0.531509	0.152057	0.0760962	-0.349303	2.86953e-05	-0.34302	4.07186e-05	-0.0357035	0.678726	-0.127205	0.138532	-0.16435	0.0549703	0.411548	5.84956e-07	0.384204	3.57025e-06	-0.0742267	0.388671	0.21168	0.0130223	0.25444	0.00269628	0.284731	0.000745607	0.318462	0.000149089	-0.00387191	0.964183	-0.237079	0.00528074
C2CD4B	blue	-0.0823389	0.338796	0.0473269	0.582882	0.00931584	0.913962	-0.220651	0.00956952	-0.00513036	0.952554	0.0829456	0.335237	0.00926261	0.914452	0.097819	0.255462	-0.271089	0.00135458	-0.0250191	0.771661	0.267602	0.00157029	0.248607	0.00339674	0.0608045	0.480293	0.73274	2.5168e-24	0.400824	1.21229e-06	-0.190566	0.02571	0.0516626	0.548802	-0.0622685	0.469767	-0.105617	0.219322	-0.138645	0.10615	-0.41629	4.20373e-07	-0.286221	0.000697256
FAM174B	blue	-0.0725354	0.399599	0.107081	0.212965	-0.0246881	0.7746	0.0454974	0.597549	-0.123327	0.151069	-0.0166206	0.847139	-0.0481479	0.576355	0.0644076	0.454616	-0.165939	0.0526327	0.247797	0.00350612	0.0449041	0.602342	0.12849	0.134559	-0.0575091	0.504445	0.428287	1.78106e-07	0.248984	0.00334695	-0.29597	0.000445558	-0.19324	0.0236686	-0.140662	0.101112	-0.270967	0.00136162	-0.262318	0.00195727	-0.374887	6.37806e-06	0.106453	0.215677
MIR621	blue	0.0210787	0.806854	0.0390549	0.650469	0.108308	0.20774	-0.0573503	0.505625	-0.0310124	0.719033	-0.00185148	0.982869	-0.0417519	0.628083	0.094722	0.270892	-0.0283123	0.742597	0.0774458	0.368373	0.0101478	0.906312	-0.17719	0.0383242	-0.0284509	0.741381	0.29647	0.000435262	0.0315543	0.714334	-0.126063	0.14214	-0.149136	0.0819743	-0.00273075	0.974735	-0.163394	0.0564182	-0.0247715	0.773859	-0.111872	0.193081	0.243094	0.00420524
CHRNB1	blue	-0.0331592	0.700483	0.234665	0.0057771	-0.00928433	0.914252	-0.0896083	0.297725	-0.0133734	0.876739	-0.118995	0.166065	-0.0914331	0.287955	0.00347093	0.967891	0.0293957	0.733112	-0.0687802	0.42451	0.0999844	0.24504	-0.0362515	0.674074	-0.257511	0.00238256	0.398692	1.39698e-06	0.138082	0.107592	-0.0450044	0.60153	-0.0646474	0.452935	-0.0637292	0.459391	0.0621287	0.470767	0.0608319	0.480095	0.0377072	0.661775	-0.271929	0.00130679
C6	blue	0.0518907	0.547037	-0.0200758	0.815876	-0.0320512	0.710036	0.00151012	0.986027	-0.058584	0.496498	0.00915697	0.915424	-0.118826	0.16667	0.201644	0.0181336	-0.473968	4.91096e-09	-0.220786	0.00952434	-0.0539169	0.531477	-0.0975524	0.256766	-0.0459597	0.593827	0.764605	1.56789e-27	0.474017	4.89055e-09	-0.0496601	0.564421	0.125142	0.145099	0.123131	0.151723	0.120532	0.16062	0.17741	0.0380803	-0.273441	0.00122467	-0.103432	0.229062
CLDN10	blue	-0.0798945	0.353378	0.0176128	0.838135	-0.189062	0.0269232	-0.136308	0.11223	-0.0313165	0.716395	-0.04445	0.606021	-0.051571	0.549512	0.118481	0.167913	-0.391199	2.28229e-06	-0.0311314	0.718001	-0.0851243	0.322653	-0.058515	0.497006	-0.0257378	0.765289	0.598799	1.08692e-14	0.335426	6.15474e-05	-0.168675	0.0487989	-0.0337591	0.695331	0.0279548	0.745735	-0.00188518	0.982557	0.100826	0.241071	-0.158315	0.0646424	0.0101456	0.906332
PFN1	blue	0.0739131	0.390683	-0.178187	0.0372318	0.0257538	0.765148	-0.0472961	0.583128	-0.165491	0.0532826	-0.172496	0.0438368	-0.0386128	0.65417	-0.156598	0.0676355	0.177156	0.0383617	-0.0211573	0.806148	0.014018	0.870849	0.319126	0.000144159	0.193457	0.0235092	-0.463077	1.21333e-08	-0.256247	0.00250747	0.0930665	0.279393	0.181687	0.0336011	-0.0321846	0.708884	0.130014	0.129959	-0.0818354	0.341768	0.1285	0.134528	-0.176905	0.0386412
CERS4	blue	-0.0408879	0.635219	-0.162011	0.0585665	0.0727454	0.398233	-0.125582	0.14368	-0.0376353	0.662381	0.0421746	0.624604	-0.0116835	0.892214	0.119693	0.163574	-0.527121	3.65821e-11	-0.657399	2.65241e-18	0.288607	0.000625783	-0.000980325	0.990929	-0.124948	0.14573	0.652888	5.3711e-18	0.608787	2.97039e-15	-0.135969	0.113135	0.667795	4.9772e-19	0.414648	4.71617e-07	0.357769	1.76944e-05	0.394729	1.81375e-06	-0.0753927	0.381242	-0.614981	1.29834e-15
STXBP6	blue	-0.0124547	0.885147	0.116663	0.174578	-0.0730422	0.396306	-0.00239533	0.977838	-0.107959	0.209215	0.103733	0.227705	-0.0169355	0.84428	0.110552	0.19842	-0.366889	1.03489e-05	0.0224379	0.794667	-0.0731767	0.395434	-0.141397	0.0993242	-0.208493	0.0144883	0.550408	3.22586e-12	0.319171	0.000143826	-0.132175	0.123645	-0.119108	0.165657	-0.0436613	0.612434	-0.0475592	0.581032	0.0313018	0.716523	-0.27512	0.00113908	0.179499	0.0358338
CXCL6	blue	-0.0682775	0.427911	0.0253114	0.769067	-0.121799	0.156237	-0.041206	0.632588	-0.00164473	0.984782	0.0178385	0.83609	0.000292311	0.997295	0.110512	0.198585	-0.147134	0.0862106	-0.120945	0.159181	-0.0909089	0.290739	-0.0378813	0.66031	-0.0674147	0.433785	0.371092	8.0372e-06	0.216882	0.0109074	-0.107043	0.213129	0.015705	0.855466	0.0797117	0.354484	0.118435	0.168081	0.134687	0.116606	-0.00526033	0.951354	-0.151178	0.0778272
FJX1	blue	-0.0992486	0.248548	-0.0565241	0.511785	0.0721431	0.402161	-0.013832	0.872548	0.0950094	0.269434	-0.145016	0.0908809	-0.119556	0.164061	-0.0205677	0.811448	0.044462	0.605923	-0.163345	0.0564923	0.185548	0.0299482	0.255116	0.00262415	-0.10158	0.237553	0.377753	5.34556e-06	0.219275	0.0100401	-0.041388	0.631084	0.145398	0.0900241	0.0406229	0.637415	0.117475	0.171579	0.0238912	0.78169	-0.0144073	0.867294	-0.569724	3.71491e-13
AQP8	blue	-0.0729839	0.396684	0.0421595	0.624728	0.0882423	0.30518	-0.0999894	0.245017	-0.0207536	0.809776	-0.0138486	0.872396	-0.0609655	0.47913	0.138023	0.107742	-0.278983	0.000962394	-0.148785	0.0827047	0.111065	0.196333	-0.0517945	0.547782	-0.147934	0.084498	0.936775	2.00411e-63	0.385094	3.37459e-06	-0.093362	0.277863	0.0544047	0.527763	0.0429486	0.618255	0.0714488	0.406717	0.0529685	0.538732	-0.26926	0.00146409	-0.168227	0.0494104
TECPR1	blue	-0.0175726	0.8385	-0.0484178	0.574216	0.0873249	0.310255	-0.0832075	0.333708	0.0411225	0.633278	-0.00382573	0.96461	-0.00990252	0.908567	0.0683357	0.427517	-0.246466	0.00369246	0.0256124	0.766399	0.165937	0.0526343	0.371792	7.70352e-06	0.211168	0.013249	0.629865	1.64654e-16	0.233415	0.0060502	-0.232665	0.00621952	0.079807	0.353907	-0.0329718	0.702096	-0.112895	0.189014	-0.187912	0.0278826	-0.356382	1.91708e-05	-0.267358	0.00158652
SYCN	blue	-0.0437006	0.612114	0.00569094	0.947377	0.0586655	0.495899	-0.0934441	0.277438	-0.0309039	0.719975	0.00427403	0.960467	-0.0664965	0.440088	0.13461	0.116815	-0.265946	0.00168336	-0.0947125	0.27094	0.0396172	0.645775	-0.00887043	0.918061	-0.110058	0.200445	0.884949	1.20481e-46	0.34896	2.92545e-05	-0.0675718	0.432712	0.0125303	0.884454	0.00350958	0.967533	0.0467395	0.587574	0.0172711	0.841233	-0.274356	0.00117731	-0.126628	0.140346
REG3G	blue	-0.00665056	0.93852	0.0465269	0.589275	0.0496014	0.564882	-0.113992	0.184725	-0.02452	0.776094	-0.0104779	0.903279	-0.0159296	0.853421	0.130238	0.129293	-0.261332	0.00203847	-0.157252	0.0664823	0.0628939	0.46531	-0.0897856	0.296766	-0.183178	0.0321485	0.864453	3.7718e-42	0.37752	5.42316e-06	-0.0872761	0.310527	0.0432997	0.615385	0.0807662	0.348133	0.134451	0.117254	0.0790091	0.358755	-0.258652	0.00227468	-0.149403	0.0814231
PAIP2B	blue	-0.11323	0.187699	0.110426	0.198933	0.129112	0.132665	-0.128828	0.133527	0.0118828	0.890387	0.0634821	0.461138	-0.0156736	0.855751	0.124025	0.14875	-0.24601	0.00375836	-0.239685	0.00478784	0.221349	0.00933822	-0.163501	0.056254	-0.240205	0.00469451	0.835379	6.71338e-37	0.441916	6.44301e-08	-0.17372	0.0423384	0.122522	0.153776	0.147767	0.084853	0.0535312	0.534421	0.120351	0.161256	-0.234589	0.00579351	-0.179599	0.0357295
SLC4A4	blue	0.0409255	0.634908	-0.0312456	0.71701	-0.0939575	0.274795	-0.0999431	0.245236	-0.0462686	0.591346	0.0209477	0.808031	-0.104865	0.222643	0.134089	0.118252	-0.422418	2.72225e-07	-0.00358017	0.966881	-0.091298	0.288671	-0.130223	0.129336	0.0193404	0.822508	0.797147	2.24793e-31	0.395722	1.69946e-06	-0.121219	0.158232	-0.102855	0.231685	0.00677876	0.937337	-0.0421029	0.625194	0.0263594	0.759791	-0.363292	1.28121e-05	0.171852	0.0446416
LYPLAL1-AS1	blue	-0.128753	0.133754	0.0545289	0.52682	0.118969	0.166157	-0.0497509	0.563708	0.00570016	0.947292	-0.0323035	0.707856	-0.0725463	0.399529	0.0639539	0.457807	-0.209189	0.0141567	-0.0712246	0.408194	0.242749	0.00426113	0.090194	0.294565	-0.0899064	0.296114	0.767689	7.21428e-28	0.260626	0.00209839	-0.278205	0.000995846	0.0116642	0.892391	0.0340226	0.693072	-0.0533256	0.535994	-0.00635282	0.941267	-0.204589	0.0164789	-0.285891	0.000707715
MST1P2	blue	0.0642014	0.456065	-0.0223107	0.795805	0.0819175	0.341282	0.133875	0.118846	0.0729436	0.396945	-0.00341043	0.96845	-0.0272492	0.751942	0.0689786	0.423172	-0.100753	0.241415	0.422196	2.76587e-07	0.158934	0.0635909	0.586928	4.79619e-14	0.506266	2.76674e-10	0.406378	8.33808e-07	-0.0481844	0.576065	-0.0872259	0.310806	-0.271758	0.0013164	-0.369778	8.70183e-06	-0.361208	1.4482e-05	-0.504986	3.11876e-10	-0.458947	1.69593e-08	-0.0959601	0.264649
MYLK2	blue	-0.0997794	0.246014	0.0740397	0.38987	0.176293	0.0393295	-0.121034	0.158873	0.021887	0.7996	-0.0121437	0.887996	-0.0474556	0.581857	0.097952	0.254814	-0.219789	0.00986198	-0.140963	0.100376	0.153971	0.0724315	0.0421613	0.624713	-0.109368	0.2033	0.89329	1.00048e-48	0.37031	8.42673e-06	-0.0913505	0.288393	0.0548233	0.524588	0.0372258	0.665832	0.0818337	0.341778	0.0104375	0.90365	-0.248334	0.00343322	-0.25534	0.00260068
FUT1	blue	0.0796619	0.354785	0.0943962	0.272551	0.145152	0.090575	-0.0984387	0.252449	-0.02025	0.814307	-0.0327844	0.703709	-0.0384112	0.65586	-0.060607	0.481723	0.00200012	0.981494	0.0689033	0.42368	0.22166	0.00923688	0.0205338	0.811753	-0.259766	0.00217364	0.504137	3.37578e-10	0.225891	0.0079506	-0.182432	0.0328686	-0.113009	0.188568	-0.0900807	0.295175	-0.129304	0.132085	-0.115934	0.177306	-0.234841	0.00573971	-0.127236	0.138436
SLC38A3	blue	-0.00442525	0.959069	0.0354664	0.680743	0.0180487	0.834186	-0.0423819	0.622901	0.0327633	0.703891	0.00357963	0.966886	-0.0537078	0.533072	0.183153	0.032172	-0.247784	0.00350784	-0.0492257	0.567838	0.07434	0.387945	0.0731063	0.39589	-0.0534642	0.534934	0.898537	3.98894e-50	0.328327	8.9693e-05	-0.0792366	0.357368	-0.0386269	0.654052	-0.0186916	0.828369	0.0356404	0.679263	-0.0484248	0.574161	-0.302474	0.000327578	-0.187215	0.0284792
HEBP1	blue	-0.0420509	0.625621	0.195421	0.0221089	0.0711519	0.408675	-0.0300621	0.727298	0.0775644	0.367637	0.0737134	0.391968	0.0317251	0.712856	0.137537	0.109001	0.118462	0.167982	-0.0507165	0.556156	0.326618	9.8066e-05	0.0130326	0.879856	-0.355564	2.00961e-05	0.32583	0.000102172	0.160111	0.0616283	-0.156543	0.0677331	-0.0311183	0.718114	-0.0771125	0.370443	0.0343321	0.690422	-0.0138667	0.872231	0.0371252	0.666682	-0.303613	0.000310166
TEX11	blue	-0.0933267	0.278045	0.0359252	0.676843	0.107215	0.21239	-0.084092	0.328576	0.0179399	0.835172	0.0533042	0.536158	-0.00114953	0.989363	0.0836012	0.331417	-0.304993	0.000290213	-0.209174	0.0141636	0.179816	0.0355027	-0.0739251	0.390606	-0.188829	0.0271154	0.855757	1.84716e-40	0.457066	1.97229e-08	-0.138085	0.107582	0.105707	0.218929	0.0548331	0.524513	0.100463	0.24278	0.0847109	0.325016	-0.240104	0.00471247	-0.19475	0.0225791
MYCL	blue	0.0120459	0.888892	0.0764779	0.374406	0.116244	0.176144	0.0856393	0.319723	0.135339	0.114829	-0.0721824	0.401904	-0.191202	0.0252111	-0.0181393	0.833365	-0.0768219	0.372255	-0.0420449	0.62567	0.144296	0.0925139	0.00617422	0.942916	-0.135134	0.115385	0.347152	3.23741e-05	0.0839279	0.329525	-0.00820104	0.924225	0.0711147	0.40892	0.112888	0.189043	-0.011247	0.896218	-0.028332	0.742424	-0.0532199	0.536804	-0.0624178	0.468701
SCTR	blue	-0.038599	0.654286	-0.0601523	0.485023	-0.0481398	0.576419	-0.0616774	0.474002	0.0107073	0.901172	0.0846298	0.325481	-0.0340818	0.692564	0.137891	0.108082	-0.416233	4.22059e-07	0.0984496	0.252396	0.0722884	0.401211	0.28472	0.000745972	0.249245	0.00331292	0.681265	5.14046e-20	0.259706	0.00217894	-0.171029	0.0456892	-0.0506977	0.556303	-0.0454915	0.597597	-0.0801104	0.352074	-0.174318	0.0416226	-0.418642	3.56161e-07	-0.0863012	0.315983
KLF15	blue	-0.0779448	0.365285	-0.0384103	0.655867	0.0496848	0.564228	-0.103399	0.229213	-0.0688314	0.424164	0.027831	0.746823	-0.0878668	0.307251	0.165263	0.0536164	-0.551415	2.89175e-12	-0.334051	6.62516e-05	0.0686071	0.425679	0.00161986	0.985012	0.00651341	0.939785	0.705097	6.77665e-22	0.470592	6.52216e-09	-0.228747	0.00717453	0.259099	0.00223359	0.186647	0.0289729	0.166157	0.0523174	0.261014	0.00206528	-0.18175	0.0335389	-0.293067	0.000509967
MTDHP3	blue	-0.111678	0.193858	0.00893137	0.9175	0.0441104	0.608778	0.0296396	0.730982	0.0517632	0.548024	-0.0435699	0.613179	-0.106322	0.216247	0.103239	0.229939	-0.267403	0.00158354	-0.126565	0.140544	0.244767	0.00394338	0.0929963	0.279757	-0.168953	0.0484228	0.767798	7.01774e-28	0.415338	4.49409e-07	-0.151515	0.0771595	0.0813046	0.344919	-0.0125358	0.884403	0.0231818	0.788017	0.0127147	0.882766	-0.284977	0.000737408	-0.312311	0.000202896
SAT2	blue	0.0506971	0.556307	-0.164283	0.0550698	-0.0234482	0.78564	-0.0370753	0.667103	-0.0548745	0.5242	-0.0533045	0.536156	-0.0365473	0.671567	0.0323606	0.707364	-0.554665	2.02722e-12	-0.293029	0.000510876	0.33906	5.05753e-05	0.238469	0.00501236	0.143803	0.0936446	0.602661	6.61723e-15	0.454502	2.41963e-08	-0.29011	0.000584292	0.35621	1.93626e-05	0.124148	0.148347	0.110914	0.196943	0.111443	0.194804	-0.246495	0.00368838	-0.450693	3.26801e-08
HDLBP	blue	-0.0829802	0.335034	0.131758	0.124844	0.0619005	0.472401	0.0848331	0.324317	0.201499	0.0182184	0.0950737	0.269108	-0.0625084	0.468054	0.123341	0.151023	-0.0678133	0.431066	-0.0171141	0.842658	-0.17385	0.042182	-0.378549	5.08828e-06	-0.235134	0.00567752	0.377961	5.27699e-06	0.194416	0.0228159	-0.22741	0.00752907	-0.273105	0.00124254	0.00696097	0.935656	-0.019388	0.822078	0.233788	0.00596755	0.179362	0.0359777	0.199612	0.0193571
AC123912.4	blue	-0.135255	0.115057	0.0132445	0.877917	0.0452244	0.599753	-0.0629142	0.465165	0.0139298	0.871654	0.0280178	0.745182	-0.0365036	0.671937	0.13662	0.111402	-0.291776	0.00054129	-0.0963004	0.262951	0.146019	0.088646	0.0125924	0.883885	-0.105356	0.220474	0.86937	3.69935e-43	0.379999	4.6491e-06	-0.134088	0.118255	0.0272818	0.751654	0.0394084	0.647517	-0.00553743	0.948795	0.00257023	0.97622	-0.328463	8.90523e-05	-0.177078	0.0384488
HOMER2	blue	-0.0026656	0.975338	0.0578278	0.502082	0.00755219	0.930205	-0.034716	0.68714	0.0793721	0.356544	-0.0132926	0.877478	-0.0660481	0.443184	0.197099	0.020969	-0.341487	4.42992e-05	-0.0708925	0.410389	-0.0389793	0.651101	-0.0559485	0.5161	-0.0173664	0.840369	0.839498	1.40531e-37	0.431861	1.37001e-07	-0.139865	0.10308	-0.03311	0.700907	0.0522113	0.54456	0.00157202	0.985454	0.0304155	0.724221	-0.355299	2.04045e-05	-0.0677947	0.431193
MAP3K21	blue	-0.00247296	0.97712	0.0922565	0.283617	0.00967054	0.910699	0.0495018	0.565665	-0.0185094	0.830017	0.0258465	0.764327	-0.119078	0.165765	0.0584932	0.497167	-0.0897594	0.296908	0.373461	6.95938e-06	-0.104671	0.223503	-0.137732	0.108495	0.079591	0.355215	0.541589	8.27123e-12	0.104884	0.222556	-0.13345	0.120033	-0.49541	7.52356e-10	-0.257962	0.00233931	-0.3176	0.000155735	-0.241021	0.00455131	-0.426267	2.06288e-07	0.496525	6.79983e-10
CHID1	blue	-0.104461	0.22444	0.0155135	0.857209	0.107317	0.211951	0.105944	0.217893	0.132675	0.122218	-0.00872198	0.919428	-0.104381	0.224796	-0.157352	0.0663082	-0.185663	0.0298452	-0.0524031	0.543081	0.30005	0.000367673	0.303257	0.000315508	-0.240757	0.00459727	0.47061	6.51252e-09	0.380187	4.59487e-06	-0.202919	0.0174001	0.027633	0.748563	-0.0634489	0.461372	0.0121562	0.887881	-0.0501149	0.560856	-0.0763675	0.375098	-0.497984	5.95383e-10
REG1CP	blue	-0.0422894	0.623661	0.0734356	0.39376	0.0691595	0.421954	-0.0716214	0.405581	0.032152	0.709165	-0.0407754	0.636151	-0.0364641	0.672272	0.124844	0.146067	-0.193901	0.0231866	-0.0987377	0.251004	0.166043	0.0524817	0.0297247	0.730239	-0.0902732	0.29414	0.87075	1.89557e-43	0.300254	0.000364129	-0.123193	0.151518	0.010101	0.906742	-0.000716599	0.993369	0.0463154	0.590971	-0.00447349	0.958623	-0.275892	0.00110156	-0.232727	0.00620551
P4HB	blue	-0.0858193	0.318703	0.110315	0.19939	0.0108493	0.899868	-0.00697711	0.935507	0.0732785	0.394776	0.00562268	0.948007	0.00924899	0.914577	0.090415	0.293379	0.117445	0.17169	0.104837	0.222769	-0.199503	0.019425	0.0675404	0.432927	-0.0660171	0.443398	0.416155	4.24384e-07	0.0150116	0.861782	-0.141261	0.0996525	-0.265939	0.00168386	-0.153979	0.0724157	-0.0474235	0.582113	-0.0520955	0.545454	0.0415284	0.629925	-0.0978914	0.255109
REG1B	blue	-0.0656562	0.4459	0.0237724	0.782749	0.0923681	0.283033	-0.0598086	0.487525	0.00637107	0.941099	-0.0213332	0.804569	-0.0466762	0.58808	0.142955	0.0956169	-0.214427	0.0118646	-0.137881	0.10811	0.0814705	0.343932	-0.0729991	0.396585	-0.149479	0.0812657	0.823516	4.81726e-35	0.30659	0.000268627	-0.0485305	0.573325	0.0338956	0.69416	0.0576648	0.50329	0.0925277	0.282198	0.0662414	0.441847	-0.230141	0.00682096	-0.158654	0.0640646
MST1L	blue	0.033953	0.693668	-0.00500974	0.953668	0.066866	0.437545	-0.0832117	0.333683	0.0461236	0.592511	0.0728825	0.397342	-0.0179486	0.835093	0.0590255	0.493254	-0.190073	0.0261026	0.305006	0.000290036	0.0892655	0.299584	0.41661	4.11043e-07	0.38944	2.55648e-06	0.503891	3.45401e-10	0.00986731	0.90889	-0.0296961	0.730489	-0.239297	0.0048584	-0.318973	0.000145281	-0.232409	0.00627836	-0.366257	1.07459e-05	-0.407775	7.58115e-07	0.00537092	0.950332
FAIM	blue	-0.0615706	0.474769	0.0494514	0.566061	0.020782	0.809521	0.0371434	0.666529	0.0883676	0.304491	-0.114321	0.183451	-0.129661	0.131012	0.070114	0.415561	-0.0136397	0.874305	0.0209774	0.807764	0.0171727	0.842126	0.056649	0.510852	-0.0526583	0.541116	0.553353	2.34085e-12	0.227171	0.00759405	-0.173942	0.0420715	-0.115046	0.180672	-0.0890364	0.300832	-0.055953	0.516066	-0.0113352	0.895408	-0.1805	0.0347975	-0.232289	0.00630611
NUPR1	blue	-0.0348376	0.686102	0.0130198	0.879973	0.135472	0.114469	-0.0290876	0.735805	0.00171902	0.984094	0.0252602	0.769522	0.00992539	0.908356	0.0876348	0.308535	-0.184676	0.0307428	-0.276971	0.001051	0.0607363	0.480787	0.103848	0.227187	-0.262053	0.00197884	0.383557	3.71925e-06	0.17082	0.0459595	0.0662445	0.441826	0.186452	0.0291441	0.158468	0.0643813	0.421954	2.81422e-07	0.19974	0.0192781	0.281061	0.000878126	-0.426748	1.99215e-07
TRIM14	blue	0.0953381	0.267773	-0.0607551	0.480651	0.093076	0.279343	0.0172579	0.841354	0.0836117	0.331357	-0.118803	0.166751	0.0264009	0.759425	0.0554635	0.51975	0.171304	0.0453379	0.0667383	0.438423	-0.19615	0.021607	-0.0733543	0.394286	0.0688433	0.424084	-0.370572	8.2944e-06	-0.168713	0.0487474	0.405008	9.15042e-07	0.070131	0.415448	0.179209	0.0361385	0.0221533	0.797214	-0.138511	0.106491	-0.127196	0.138561	0.296253	0.000439702
ZNF433	blue	-0.108985	0.204893	0.09017	0.294694	0.068119	0.428987	0.00587293	0.945697	0.0363028	0.673639	-0.0059001	0.945446	-0.0803247	0.350784	0.122136	0.155085	-0.0658405	0.444622	-0.0527474	0.540431	0.0574456	0.504917	-0.0136062	0.874611	-0.219655	0.00990819	0.470938	6.3359e-09	0.242238	0.00434526	-0.00232673	0.978472	-0.0754223	0.381055	-0.0617973	0.473141	0.103072	0.230695	0.0464572	0.589834	-0.0472215	0.583723	-0.212852	0.0125168
KIF12	blue	-0.0158483	0.854161	-0.0464659	0.589764	-0.0190001	0.825581	-0.0736026	0.392682	0.0145822	0.865698	0.0258224	0.764541	-0.0749048	0.38434	0.110542	0.198458	-0.424831	2.28874e-07	0.191108	0.0252846	0.00558986	0.94831	0.376242	5.86819e-06	0.368671	9.30083e-06	0.574702	2.07978e-13	0.364562	1.18852e-05	-0.139647	0.103623	-0.117134	0.172833	-0.179676	0.0356485	-0.177288	0.0382157	-0.220982	0.00945938	-0.458799	1.71621e-08	-0.0615439	0.474961
GSTA1	blue	-0.0350891	0.683957	-0.0811325	0.345944	-0.0999156	0.245367	0.0508965	0.554753	-0.140073	0.102564	-0.0197386	0.818916	0.0331412	0.700638	0.0767742	0.372553	-0.246837	0.00363961	0.145707	0.0893356	-0.0353112	0.682064	0.053836	0.532093	-0.0173298	0.840701	0.502008	4.11337e-10	0.234551	0.00580154	-0.151364	0.0774583	-0.110565	0.198367	-0.0699627	0.41657	-0.105402	0.220271	-0.191763	0.0247784	-0.429507	1.62904e-07	0.171038	0.0456787
MEIS1	blue	0.0442772	0.607423	-0.026682	0.756942	-0.0345058	0.688936	0.0256988	0.765634	0.00837926	0.922584	-0.00567985	0.947479	-0.108482	0.207006	0.0268525	0.755439	-0.434355	1.13879e-07	-0.00188647	0.982545	-0.0939211	0.274982	-0.0347991	0.686431	0.0625215	0.467961	0.584584	6.38403e-14	0.423058	2.60028e-07	-0.199743	0.0192764	-0.125145	0.145088	-0.122716	0.153119	-0.0796349	0.354949	0.140256	0.102112	-0.150871	0.078441	-0.00864653	0.920122
AKAP7	blue	-0.0040711	0.962342	-0.0714889	0.406453	-0.0974824	0.25711	-0.0282819	0.742863	-0.0219096	0.799398	-0.0622169	0.470136	-0.111395	0.194997	0.126854	0.139635	-0.430623	1.50095e-07	-0.231888	0.00639949	0.093573	0.276773	-0.049293	0.567307	-0.0193048	0.822829	0.798156	1.66526e-31	0.44312	5.87674e-08	-0.106583	0.215112	0.177582	0.0378912	0.107978	0.209137	0.127885	0.136418	0.108227	0.208081	-0.343337	4.00123e-05	-0.157558	0.065948
SYNGR1	blue	0.0371695	0.666308	-0.111202	0.195777	-0.0763858	0.374983	-0.0591835	0.492095	0.0147197	0.864444	-0.0215676	0.802465	-0.0924896	0.282397	0.0590128	0.493346	-0.658451	2.24602e-18	-0.363915	1.23487e-05	0.0876381	0.308517	-0.0343953	0.689881	-0.00254509	0.976453	0.645728	1.60685e-17	0.643177	2.35787e-17	-0.296087	0.000443134	0.333977	6.6514e-05	0.19199	0.024605	0.152165	0.0758856	0.31996	0.00013817	-0.21924	0.0100525	-0.304447	0.00029797
NRTN	blue	-0.0442779	0.607418	-0.0179697	0.834901	0.0478778	0.578499	-0.034637	0.687815	0.159797	0.0621468	0.0566341	0.510963	-0.0382793	0.656966	0.0335818	0.696852	-0.156212	0.0683236	0.148981	0.0822975	0.234606	0.00578988	0.410565	6.26036e-07	0.055884	0.516584	0.588749	3.83424e-14	0.29129	0.000553521	-0.353238	2.2959e-05	-0.143799	0.0936539	-0.222273	0.00903976	-0.215923	0.0112728	-0.189492	0.0265715	-0.263058	0.00189832	-0.353353	2.28094e-05
LRCH1	blue	-0.00421597	0.961003	0.057082	0.507621	0.0157713	0.854863	-0.0519279	0.546749	-0.135377	0.114727	-0.0310251	0.718923	-0.0323919	0.707094	-1.23119e-05	0.999886	0.0222739	0.796135	0.0377962	0.661026	-0.280307	0.000907891	-0.396726	1.59092e-06	-0.00452738	0.958125	-0.429818	1.59232e-07	-0.211457	0.0131207	0.182734	0.0325754	-0.109931	0.200967	0.0166239	0.847109	0.0818024	0.341963	0.163486	0.0562768	0.200105	0.0190538	0.555648	1.81943e-12
PBLD	blue	-0.0338291	0.694731	0.0953958	0.267482	-0.0161959	0.851	-0.145132	0.0906202	-0.109861	0.201257	0.0661342	0.442589	-0.00874633	0.919204	0.104718	0.223294	-0.283663	0.000782136	0.239637	0.00479653	0.0141445	0.869693	0.0883388	0.304649	0.139731	0.103414	0.463777	1.14585e-08	0.111607	0.194145	-0.0278589	0.746578	-0.216299	0.0111281	-0.181977	0.0333148	-0.185808	0.0297147	-0.262719	0.00192517	-0.428993	1.69153e-07	0.330096	8.17273e-05
ADHFE1	blue	-0.0177656	0.836751	-0.0224395	0.794653	0.0725165	0.399723	-0.0111532	0.897079	0.0162814	0.850222	-0.023196	0.78789	-0.0155202	0.857148	0.150395	0.0793986	-0.487482	1.52835e-09	-0.106222	0.216679	0.135777	0.113648	0.259527	0.00219493	0.411855	5.72684e-07	0.579749	1.1435e-13	0.227993	0.00737267	-0.179516	0.035816	0.182828	0.0324847	-0.0400101	0.642503	-0.0563807	0.512858	-0.00361521	0.966557	-0.292308	0.000528181	-0.225646	0.00802059
ACADL	blue	-0.0441464	0.608486	0.066773	0.438184	0.116917	0.173637	-0.0273127	0.751382	0.0106993	0.901246	-0.00487994	0.954868	-0.109934	0.200956	0.159454	0.0627174	-0.348339	3.0293e-05	-0.162651	0.0575646	0.120227	0.161689	-0.0786398	0.361013	-0.0969355	0.259801	0.905045	5.68305e-52	0.454728	2.37663e-08	-0.178348	0.037057	0.0515421	0.549737	0.0702456	0.414684	0.034592	0.6882	0.0962384	0.26326	-0.284036	0.000769206	-0.169171	0.0481292
FUNDC2	blue	-0.0702505	0.414652	0.00303484	0.971923	-0.025025	0.771608	-0.0620583	0.47127	0.00849954	0.921476	0.038209	0.657557	-0.0415516	0.629734	-0.0157722	0.854854	-0.220128	0.00974622	-0.297574	0.000413291	0.419537	3.34299e-07	0.143097	0.0952843	-0.301475	0.00034358	0.429801	1.59427e-07	0.404295	9.602e-07	-0.233368	0.00606082	0.291656	0.000544288	0.0449318	0.602117	0.11466	0.182148	0.140932	0.100454	-0.0588252	0.494724	-0.638588	4.65717e-17
CEL	blue	-0.027422	0.750421	-0.00371906	0.965596	0.0525335	0.542076	-0.0756925	0.379346	-0.0135242	0.87536	0.00813292	0.924853	-0.0450064	0.601514	0.156024	0.0686611	-0.265604	0.00170758	-0.136231	0.112435	0.00291268	0.973053	-0.0957451	0.265726	-0.141592	0.0988547	0.886409	5.3521e-47	0.363186	1.28922e-05	-0.0674076	0.433834	0.019752	0.818795	0.0697051	0.418293	0.093066	0.279395	0.0775774	0.367557	-0.23819	0.00506528	-0.104013	0.226445
TM7SF3	blue	-0.000695903	0.993561	0.199297	0.0195532	-0.0050087	0.953678	-0.0310281	0.718897	0.0981525	0.253838	0.0388983	0.651779	-0.0360069	0.676149	0.127336	0.138122	-0.0366489	0.670708	0.00837758	0.922599	-0.086337	0.315782	-0.373511	6.93817e-06	-0.102058	0.235342	0.382313	4.02209e-06	0.198703	0.0199277	-0.00902131	0.916672	-0.218505	0.0103122	0.0295182	0.732042	-0.0791266	0.358038	0.0757935	0.378708	-0.148637	0.0830146	0.247621	0.00353027
MT1G	blue	0.0167835	0.84566	0.0463253	0.590891	0.0801227	0.352	-0.0674706	0.433404	0.0434089	0.614493	0.0492501	0.567645	-0.0253471	0.768751	0.150295	0.079601	-0.230048	0.00684388	-0.101797	0.236545	0.0966648	0.26114	0.0174013	0.840052	-0.192922	0.023904	0.798329	1.58175e-31	0.361216	1.44756e-05	0.0088943	0.917841	0.0391235	0.649896	0.0352891	0.682253	0.0776127	0.367338	-0.00554977	0.948681	-0.256036	0.00252887	-0.153369	0.0735684
CYB5A	blue	-0.0309564	0.719519	0.0750973	0.383116	0.0251146	0.770813	-0.0669104	0.437241	-0.0699693	0.416527	0.145693	0.0893671	0.0869146	0.312543	0.176602	0.0389814	-0.434473	1.12887e-07	-0.0767129	0.372935	0.178067	0.0373618	0.0245814	0.775549	-0.181508	0.033779	0.719783	3.76865e-23	0.361681	1.40861e-05	-0.139016	0.105209	0.0443254	0.607032	-0.00389891	0.963934	0.0157909	0.854684	-0.0263696	0.759701	-0.36152	1.42198e-05	-0.0632794	0.462573
SH3KBP1	blue	-0.00693401	0.935905	0.104579	0.223914	-0.0236834	0.783542	-0.17797	0.0374667	-0.204297	0.016637	-0.0482313	0.575694	0.00807676	0.92537	-0.0350575	0.684226	0.221817	0.00918626	-0.162436	0.0578992	-0.26597	0.00168166	-0.326066	0.000100926	-0.22325	0.00873343	-0.422897	2.63038e-07	-0.100413	0.243015	0.310461	0.000222302	0.158781	0.0638499	0.214059	0.0120143	0.206072	0.0156966	0.159337	0.062914	0.206171	0.0156452	0.20476	0.0163867
CCDC149	blue	0.0284259	0.7416	0.0543701	0.528027	0.039839	0.643927	-0.0765848	0.373737	-0.0283337	0.742409	0.0214275	0.803722	-0.0795253	0.355614	0.0247606	0.773956	-0.14575	0.0892418	0.00497928	0.95395	-0.110931	0.196876	-0.223611	0.00862257	-0.348352	3.02707e-05	0.437001	9.34455e-08	0.262891	0.0019115	-0.265055	0.00174723	-0.225849	0.00796272	-0.101921	0.235973	-0.0223641	0.795327	0.146907	0.0867018	0.0262927	0.760381	0.043248	0.615807
PSAT1	blue	-0.0260672	0.762374	0.152989	0.0742927	0.171872	0.0446176	-0.0437924	0.611366	0.123073	0.15192	-0.0245488	0.775838	0.00468794	0.956642	0.150902	0.0783783	0.197288	0.0208438	-0.0787718	0.360205	0.0632205	0.462991	-0.155652	0.0693322	-0.309672	0.000231097	0.354239	2.16824e-05	0.157139	0.0666805	0.188265	0.0275851	-0.0104238	0.903776	0.0304254	0.724135	0.0203055	0.813808	-0.0397761	0.644451	-0.138579	0.106318	-0.0719986	0.403106
RAB3IP	blue	0.0268068	0.755841	0.155188	0.0701762	-0.142186	0.0974322	0.0864032	0.31541	-0.0551785	0.521901	-0.085857	0.31849	-0.0771433	0.370252	0.0191221	0.824479	-0.0410974	0.633485	0.241541	0.00446222	0.0283493	0.742273	-0.0855221	0.320388	-0.088573	0.303364	0.462835	1.23752e-08	0.26215	0.00197092	-0.0975314	0.256869	-0.314531	0.000181673	-0.286418	0.000691072	-0.246378	0.00370515	-0.195886	0.0217873	-0.447847	4.08118e-08	0.191816	0.0247382
LRRC75B	blue	-0.0157543	0.855017	-0.0557673	0.517462	-0.0585929	0.496433	0.0410551	0.633835	-0.00713498	0.934051	-0.054012	0.530752	-0.115439	0.179176	0.0622224	0.470096	-0.204795	0.0163682	0.349736	2.80028e-05	-0.036035	0.67591	0.53416	1.79036e-11	0.341772	4.3611e-05	0.397191	1.54289e-06	-0.0250791	0.771128	-0.150195	0.0798022	-0.229036	0.00709988	-0.26361	0.00185542	-0.266153	0.00166886	-0.337676	5.45172e-05	-0.289569	0.000598942	-0.0866262	0.314157
EGF	blue	-0.0803354	0.350719	0.0920567	0.284666	0.0685017	0.426392	-0.11465	0.182188	0.0258291	0.764481	0.0296471	0.730917	0.0216562	0.801671	0.137163	0.109976	-0.227634	0.00746881	-0.117536	0.171355	0.0927347	0.281118	-0.102373	0.233889	-0.119614	0.163855	0.781146	2.10813e-29	0.286645	0.000684023	-0.10209	0.235194	0.0187413	0.82792	0.0241955	0.778981	0.0651788	0.449222	0.0516163	0.549162	-0.174027	0.0419697	-0.0807213	0.348402
MT-RNR1	blue	0.0912158	0.289107	-0.0831226	0.334203	-0.13571	0.11383	0.125107	0.145211	-0.0594865	0.489878	-0.0479312	0.578074	-0.0173744	0.840297	-0.0254989	0.767405	0.170622	0.0462157	0.440145	7.37153e-08	0.0138642	0.872253	0.491084	1.11007e-09	0.371906	7.65027e-06	-0.226472	0.00778698	-0.279972	0.000921409	0.0430793	0.617186	-0.235798	0.00553907	-0.389791	2.49945e-06	-0.310283	0.000224259	-0.481538	2.56994e-09	-0.277847	0.00101154	0.0518805	0.547116
LEFTY1	blue	0.0446251	0.604601	0.0390481	0.650526	0.014448	0.866923	-0.0586486	0.496023	0.0314687	0.715076	0.0511221	0.552998	-0.0321161	0.709475	0.0695079	0.419614	-0.312011	0.00020593	0.0158696	0.853968	0.00820738	0.924167	0.127215	0.138502	-0.0160356	0.852457	0.596777	1.40575e-14	0.291162	0.000556775	-0.064746	0.452245	-0.0120438	0.88891	0.0768373	0.372158	-0.0258909	0.763934	-0.0538503	0.531984	-0.260566	0.00210362	-0.0754352	0.380973
SLC2A11	blue	-0.0407483	0.636375	-0.057144	0.50716	0.123443	0.150681	-0.0238624	0.781947	0.0534001	0.535424	-0.0117189	0.891889	-0.0544336	0.527544	0.00417595	0.961373	-0.316529	0.000164364	-0.187362	0.0283524	0.333605	6.78485e-05	0.287834	0.000648159	0.194161	0.0229988	0.399226	1.34842e-06	0.265045	0.00174791	-0.334847	6.34876e-05	0.301013	0.000351225	0.114578	0.182462	-0.0828682	0.335689	0.0242827	0.778205	-0.129405	0.131783	-0.454866	2.35077e-08
AC009078.2	blue	-0.0623403	0.469254	0.0409509	0.634697	0.0643443	0.45506	-0.0654529	0.447313	0.0339059	0.694072	-0.0279826	0.745491	-0.0658731	0.444396	0.140063	0.102588	-0.243324	0.00416835	-0.0547037	0.525494	0.135806	0.113572	0.122645	0.15336	0.0676839	0.431948	0.896988	1.05109e-49	0.31922	0.000143467	-0.0905385	0.292717	0.00295815	0.972632	-0.0790302	0.358626	-0.0101036	0.906718	-0.0615759	0.474731	-0.338828	5.12153e-05	-0.214235	0.0119425
MAT1A	blue	-0.113452	0.186828	0.111594	0.194195	0.20134	0.0183122	-0.0627581	0.466275	0.0564133	0.512614	0.0145314	0.866161	-0.00492484	0.954453	0.0361018	0.675344	-0.239676	0.00478942	-0.106834	0.21403	0.216266	0.0111408	-0.0594166	0.490389	-0.194181	0.0229848	0.722573	2.13182e-23	0.547192	4.56163e-12	-0.148435	0.0834397	0.00284749	0.973656	0.000342052	0.996835	-0.020209	0.814676	0.0158541	0.854109	-0.273703	0.00121094	-0.148834	0.0826024
REG3A	blue	-0.00897125	0.917133	0.00478872	0.95571	0.0531541	0.537308	-0.0751682	0.382665	-0.00580324	0.94634	0.0541131	0.529981	0.00831824	0.923146	0.127303	0.138227	-0.244749	0.00394614	-0.153835	0.0726871	0.0122295	0.887209	-0.0736573	0.39233	-0.117964	0.169789	0.795747	3.39823e-31	0.341573	4.40889e-05	-0.06308	0.463987	0.0363689	0.673079	0.1081	0.208619	0.111471	0.19469	0.0994843	0.247421	-0.188479	0.0274059	-0.145785	0.089162
TMSB10	blue	-0.0577825	0.502417	0.0146387	0.865182	0.024701	0.774486	0.132793	0.121883	0.0561529	0.514566	-0.0868504	0.312902	-0.00662335	0.938771	-0.130793	0.127653	0.589397	3.53967e-14	0.208916	0.0142859	0.0085914	0.92063	0.0843231	0.327244	-0.144967	0.0909919	-0.640832	3.34348e-17	-0.483576	2.15286e-09	0.287186	0.000667496	-0.15366	0.0730162	-0.143833	0.0935752	-0.0370325	0.667465	-0.171575	0.0449919	0.307239	0.000260276	-0.0130158	0.88001
PSEN2	blue	-0.0172247	0.841654	-0.0156374	0.856081	0.226105	0.00788991	-0.0827962	0.336111	-0.0692067	0.421637	-0.144354	0.0923823	-0.175444	0.0403024	-0.0895373	0.29811	-0.23777	0.00514573	0.178457	0.0369403	0.125975	0.142419	0.209703	0.0139158	-0.0130195	0.879976	0.505717	2.91267e-10	0.252582	0.00290377	-0.153562	0.0732028	-0.140356	0.101864	-0.105628	0.219277	-0.130976	0.127118	-0.228133	0.00733567	-0.363605	1.25776e-05	-0.0421052	0.625175
CUZD1	blue	-0.0887218	0.302549	0.0494201	0.566307	0.0757597	0.378922	-0.107789	0.209939	-0.0265675	0.757953	-0.0128131	0.881865	-0.0353906	0.681388	0.144374	0.0923367	-0.231602	0.0064668	-0.116514	0.175134	0.108911	0.205204	-0.0488122	0.571098	-0.115845	0.177641	0.916166	1.85542e-55	0.330749	7.89604e-05	-0.0912982	0.28867	0.0171135	0.842664	0.0220903	0.797779	0.041693	0.628568	0.0256351	0.766199	-0.275057	0.00114215	-0.148009	0.0843395
SLC17A4	blue	0.0318864	0.71146	-0.047674	0.580118	-0.0867067	0.313706	-0.00394068	0.963548	-0.0173132	0.840852	-0.0360398	0.67587	-0.11918	0.165402	0.132397	0.12301	-0.4263	2.05793e-07	-0.0644721	0.454164	-0.0382923	0.656858	-6.56759e-05	0.999392	0.126603	0.140423	0.792252	9.40696e-31	0.369758	8.7123e-06	-0.106592	0.215074	0.00782459	0.927694	0.00389898	0.963933	-0.00433815	0.959874	0.0233893	0.786165	-0.366004	1.09091e-05	-0.00273466	0.974699
GNMT	blue	-0.0963161	0.262873	0.0654102	0.44761	0.14603	0.0886201	-0.0727264	0.398357	-0.025781	0.764907	-0.0181983	0.832831	-0.0553803	0.520377	0.142991	0.0955334	-0.2621	0.00197499	-0.141049	0.100168	0.209043	0.0142255	0.0724078	0.400432	-0.0599643	0.486391	0.893394	9.3991e-49	0.374682	6.45873e-06	-0.146893	0.0867321	0.101951	0.235834	0.0443217	0.607062	0.00965952	0.910801	0.00234061	0.978344	-0.287595	0.000655242	-0.278815	0.000969528
JADE1	blue	-0.144594	0.0918357	0.0120656	0.888711	-0.0480512	0.577121	-0.160016	0.0617856	-0.157921	0.06532	0.0245956	0.775422	-0.0880337	0.30633	0.159622	0.0624377	-0.4625	1.27173e-08	-0.399613	1.31413e-06	0.0837621	0.330484	-0.253001	0.00285575	-0.0916796	0.286652	0.610992	2.2169e-15	0.525824	4.16544e-11	-0.238743	0.00496104	0.258753	0.00226535	0.184129	0.0312499	0.0845279	0.326067	0.350033	2.75377e-05	-0.173145	0.0430376	-0.207548	0.0149498
RNF186	blue	-0.00977243	0.909763	0.0637906	0.458958	-0.114398	0.183156	-0.100274	0.243671	0.0496916	0.564174	0.152157	0.0759013	0.0628766	0.465432	0.117775	0.170481	-0.127072	0.138948	0.109652	0.202119	0.0981047	0.25407	0.0666243	0.439208	-0.12827	0.135234	0.63742	5.528e-17	0.146215	0.0882139	-0.0119473	0.889796	-0.113566	0.186383	-0.0313735	0.715901	-0.0941614	0.273751	-0.200627	0.0187375	-0.286288	0.000695141	0.0733557	0.394276
FAM149A	blue	-0.0340223	0.693074	0.0890899	0.30054	-0.102613	0.232788	-0.0898504	0.296416	-0.00235885	0.978175	-0.0397948	0.644295	-0.0933124	0.278119	0.115599	0.17857	-0.314545	0.000181553	0.121579	0.15699	-0.0999622	0.245146	0.0219334	0.799184	-0.0201261	0.815424	0.592396	2.43916e-14	0.297381	0.000417063	-0.198529	0.0200382	-0.180879	0.0344111	-0.117524	0.171397	-0.101739	0.236813	-0.059374	0.4907	-0.346154	3.42291e-05	0.0846699	0.325252
RPL23AP49	blue	0.068092	0.429171	-0.0185154	0.829962	0.126031	0.142242	-0.140952	0.100403	0.0260682	0.762365	-0.0359623	0.676528	-0.0597496	0.487956	0.0221589	0.797164	-0.298729	0.000391399	-0.300498	0.000359937	0.14799	0.0843788	-0.0171761	0.842095	-0.24574	0.00379783	0.749587	5.83682e-26	0.515459	1.15337e-10	-0.0753263	0.381663	0.184328	0.031064	0.149722	0.0807677	0.198052	0.0203447	0.192153	0.0244815	-0.142011	0.0978508	-0.38672	3.04298e-06
CLPS	blue	-0.02996	0.728188	0.00330331	0.96944	0.0556738	0.518166	-0.0906323	0.292216	-0.0541171	0.529951	0.0310203	0.718964	-0.0467646	0.587372	0.148238	0.0838544	-0.263447	0.00186804	-0.119711	0.163511	0.0263734	0.759667	-0.0748168	0.3849	-0.159287	0.0629974	0.86453	3.63865e-42	0.349421	2.85045e-05	-0.0538604	0.531907	0.0138361	0.87251	0.0310475	0.718728	0.0832312	0.333569	0.0599633	0.486399	-0.237336	0.00523005	-0.112628	0.19007
C11orf54	blue	-0.0150664	0.861283	0.139429	0.104168	-0.0697268	0.418148	-0.0350531	0.684264	-0.0978803	0.255163	0.075108	0.383047	-0.0295417	0.731836	0.0641732	0.456263	-0.261419	0.00203114	0.138311	0.107003	-0.19592	0.0217645	-0.285028	0.000735719	-0.106434	0.215759	0.409796	6.60071e-07	0.0959846	0.264527	-0.111018	0.196521	-0.261264	0.00204416	-0.113766	0.185602	-0.170335	0.0465882	0.0479694	0.577771	-0.147585	0.0852431	0.376192	5.88634e-06
PPP1R15A	blue	0.0517211	0.548349	0.0350572	0.684229	-0.144953	0.0910237	0.183099	0.0322242	0.0540743	0.530277	0.050524	0.557658	0.0775392	0.367793	-0.0469103	0.586207	0.235573	0.00558566	0.260368	0.00212072	0.143052	0.0953887	0.140239	0.102153	0.159488	0.0626618	-0.340254	4.73897e-05	-0.251381	0.00304547	-0.0938	0.275605	-0.192451	0.024256	-0.216781	0.0109455	-0.221992	0.00912983	-0.189854	0.026278	-0.00781436	0.927788	0.0748415	0.384743
PNLIPRP2	blue	-0.0516377	0.548996	-0.0405012	0.638424	0.0624349	0.468578	-0.0722449	0.401495	-0.0177281	0.83709	-0.00721064	0.933354	-0.0685402	0.426132	0.0936103	0.276581	-0.262471	0.00194499	-0.149278	0.081681	0.0470277	0.585269	-0.0515717	0.549507	-0.139878	0.103047	0.850791	1.52293e-39	0.323047	0.000117981	-0.088272	0.305017	0.0463969	0.590318	0.0533025	0.536171	0.0923345	0.283208	0.0831106	0.334273	-0.200697	0.018695	-0.163888	0.0556652
MT-ND4	blue	0.0570959	0.507518	-0.0579318	0.501312	-0.172595	0.0437145	0.00130905	0.987887	-0.0437958	0.611339	-0.0142127	0.86907	-0.0526715	0.541015	-0.056887	0.509075	0.12832	0.135079	0.346884	3.28621e-05	-0.25735	0.00239809	0.19272	0.0240548	0.419106	3.44672e-07	-0.560054	1.11546e-12	-0.349408	2.85261e-05	-0.0432098	0.616119	-0.232622	0.00622934	-0.21302	0.0124459	-0.282648	0.00081836	-0.194237	0.0229443	0.00243417	0.977479	0.296888	0.000426821
MT1F	blue	-0.0145709	0.865801	0.0538331	0.532115	0.0727899	0.397944	-0.0779581	0.365203	0.0569323	0.508737	-0.0399474	0.643025	-0.0735864	0.392787	0.120423	0.161004	-0.234385	0.00583733	-0.0702678	0.414536	0.206881	0.0152832	0.114953	0.181025	-0.182751	0.032559	0.791253	1.25396e-30	0.497999	5.94576e-10	-0.0874631	0.309487	0.0361035	0.675329	-0.0364751	0.672179	0.00687489	0.93645	-0.0759834	0.377512	-0.376136	5.90672e-06	-0.289756	0.000593825
C5	blue	-0.134382	0.117443	0.121919	0.155828	0.150131	0.0799325	-0.185536	0.0299597	0.0249361	0.772397	0.0218778	0.799683	0.0267613	0.756242	0.133766	0.119147	-0.240772	0.00459459	-0.306115	0.000274888	0.123023	0.152086	-0.23298	0.00614793	-0.136984	0.110444	0.613946	1.49274e-15	0.373025	7.14669e-06	-0.00685776	0.936608	0.157371	0.0662739	0.128032	0.135965	0.178978	0.0363836	0.152506	0.0752221	-0.183981	0.0313883	-0.0607281	0.480846
CELA2A	blue	-0.0451469	0.600379	0.0268042	0.755864	0.0682904	0.427824	-0.103747	0.227639	-0.0625829	0.467523	-0.00365586	0.966181	-0.0789306	0.359234	0.116002	0.17705	-0.267396	0.00158399	-0.113847	0.18529	0.0536168	0.533767	-0.0590363	0.493174	-0.153889	0.0725842	0.866832	1.24064e-42	0.347707	3.13841e-05	-0.101937	0.2359	0.0272963	0.751527	0.0400413	0.642244	0.0471861	0.584005	0.0572276	0.506538	-0.227101	0.00761332	-0.119849	0.163024
LINC00671	blue	-0.0493821	0.566607	-0.0100488	0.907222	0.0712706	0.407891	-0.0801619	0.351764	0.0497086	0.564041	0.00315633	0.9708	-0.0328261	0.70335	0.133441	0.120057	-0.328113	9.07012e-05	-0.0601315	0.485175	0.193904	0.0231839	0.178689	0.0366914	0.0932048	0.278676	0.883042	3.42091e-46	0.378435	5.12415e-06	-0.141015	0.10025	0.0335314	0.697285	-0.0902562	0.294231	-0.00937178	0.913447	-0.0776066	0.367376	-0.370913	8.12478e-06	-0.257565	0.00237728
CHN2	blue	0.179292	0.0360511	-0.0480778	0.576911	-0.0552779	0.52115	0.0100505	0.907206	-0.0763557	0.375172	0.120722	0.159956	0.0421929	0.624454	-0.0134688	0.875867	-0.340486	4.67929e-05	0.0755284	0.380383	-0.0993756	0.24794	-0.235661	0.00556745	-0.163107	0.0568584	0.312694	0.000199074	0.131013	0.12701	-0.0796218	0.355029	-0.141526	0.0990134	-0.0174058	0.840012	0.00171512	0.98413	-0.0127972	0.88201	-0.22093	0.0094766	0.441738	6.53105e-08
MYOM1	blue	-0.0302404	0.725744	0.0940744	0.274196	-0.152267	0.0756865	-0.023285	0.787096	-0.0759656	0.377623	-0.0421908	0.624471	-0.00185034	0.982879	0.0167703	0.845779	-0.304992	0.000290227	0.243183	0.00419102	-0.114952	0.181029	-0.0058805	0.945627	0.183791	0.0315662	0.254647	0.00267401	0.0990256	0.249618	-0.252319	0.00293424	-0.229133	0.00707496	-0.264453	0.00179158	-0.2656	0.0017079	-0.104126	0.225939	-0.326608	9.81214e-05	0.324459	0.000109696
PPP2R2D	blue	-0.0389994	0.650934	0.00806952	0.925437	0.124544	0.147047	0.0797866	0.35403	0.0729187	0.397107	-0.0390472	0.650533	-0.0250678	0.771229	-0.0459447	0.593948	0.0601116	0.485319	0.19326	0.0236542	0.360488	1.51053e-05	0.471198	6.19977e-09	0.110781	0.197486	0.45079	3.24338e-08	0.00712022	0.934188	-0.136834	0.11084	-0.0860221	0.317557	-0.326296	9.9724e-05	-0.244517	0.00398153	-0.381528	4.22536e-06	-0.339929	4.82362e-05	-0.327691	9.27254e-05
SERPINI2	blue	-0.0782961	0.363122	0.0485115	0.573475	0.0861635	0.316759	-0.119398	0.164622	-0.0186701	0.828563	-0.0122383	0.887128	-0.0468603	0.586608	0.133156	0.120858	-0.278554	0.000980694	-0.171733	0.0447925	0.118513	0.167799	-0.0915834	0.28716	-0.174197	0.0417668	0.93839	3.68912e-64	0.3912	2.28208e-06	-0.098891	0.250266	0.0594833	0.489901	0.0586716	0.495853	0.0883374	0.304657	0.07699	0.371206	-0.259328	0.00221287	-0.165731	0.0529336
MSRB1	blue	0.0482517	0.575532	0.103599	0.228308	0.261173	0.00205183	-0.0280316	0.745061	0.0559708	0.515933	-0.0548076	0.524707	0.0217714	0.800637	-0.0113664	0.895122	-0.010276	0.905134	0.0749971	0.383753	0.195645	0.0219532	0.292102	0.000533198	-0.110792	0.19744	0.563033	7.98006e-13	0.0456414	0.596389	0.0402346	0.640637	-0.0903837	0.293547	-0.147308	0.0858367	0.0615643	0.474814	-0.252412	0.00292344	-0.224111	0.0084711	-0.223206	0.00874723
SERPINA4	blue	-0.0993443	0.24809	0.00337647	0.968764	0.0175492	0.838711	-0.0444844	0.605742	-0.079245	0.357317	0.0754491	0.380885	0.0296536	0.73086	0.220624	0.00957857	-0.234597	0.00579164	0.134935	0.115927	0.019463	0.821402	0.16984	0.0472394	0.145819	0.0890873	0.568695	4.18284e-13	0.148751	0.0827763	-0.152542	0.075153	-0.103494	0.228782	-0.0739866	0.390211	-0.0867415	0.313511	-0.197159	0.0209291	-0.361211	1.44792e-05	0.0275666	0.749148
LINC01829	blue	-0.0414032	0.630959	0.0161121	0.851761	0.136733	0.111106	-0.0123115	0.886458	0.0418105	0.6276	-0.0124735	0.884974	-0.0189887	0.825684	0.0876867	0.308247	-0.301713	0.000339707	-0.0520873	0.545518	0.243228	0.00418379	0.105828	0.218398	-0.0456131	0.596617	0.914088	9.02181e-55	0.365329	1.13561e-05	-0.160261	0.0613818	0.00876707	0.919013	-0.0588561	0.494497	-0.027755	0.747491	-0.088954	0.301281	-0.396002	1.6685e-06	-0.210931	0.013355
SLC39A14	blue	0.0117517	0.891589	0.138216	0.107246	0.0247824	0.773762	-0.0854856	0.320595	0.0123332	0.88626	0.210384	0.0136022	0.0422735	0.623791	0.145547	0.0896914	-0.275154	0.00113738	-0.0691295	0.422155	-0.135394	0.114682	-0.41348	5.11603e-07	-0.131777	0.124789	0.443988	5.49851e-08	0.341208	4.49813e-05	-0.179739	0.0355826	-0.165077	0.0538906	0.0493765	0.56665	0.0387121	0.653338	0.202072	0.0178844	-0.101144	0.23958	0.349854	2.7817e-05
SFRP5	blue	-0.00722651	0.933207	-0.0659202	0.44407	-0.0235399	0.784822	-0.0482188	0.575793	-0.0103333	0.904607	-0.00350929	0.967536	-0.139977	0.102801	0.173818	0.0422206	-0.37303	7.1449e-06	-0.00766491	0.929166	-0.0114592	0.894271	0.135896	0.113329	0.0182348	0.832501	0.790677	1.47865e-30	0.369319	8.9456e-06	-0.0974293	0.25737	-0.0307619	0.721208	-0.00298823	0.972354	0.00672363	0.937846	-0.0506768	0.556465	-0.332657	7.13648e-05	-0.119898	0.162849
GRB10	blue	-0.0433965	0.614595	0.127629	0.137211	-0.0511136	0.553063	-0.120354	0.161246	-0.0513661	0.551102	0.0279947	0.745385	-0.121085	0.158697	0.172771	0.0434964	-0.335186	6.23442e-05	-0.26034	0.00212315	-0.203756	0.0169332	-0.214568	0.0118079	-0.165994	0.0525521	0.64954	8.99873e-18	0.544377	6.15961e-12	-0.144386	0.0923099	0.050875	0.554921	0.102081	0.235235	0.126927	0.139403	0.329455	8.45343e-05	-0.0168271	0.845263	-0.175654	0.0400594
AMY2B	blue	-0.071359	0.407308	0.0327326	0.704156	0.0878172	0.307525	-0.123343	0.151016	-0.0620109	0.47161	0.00924667	0.914598	-0.0161905	0.851049	0.114623	0.182291	-0.279993	0.000920562	-0.0883586	0.304541	0.125877	0.142732	0.0347597	0.686767	-0.023515	0.785044	0.875324	1.95341e-44	0.342124	4.27765e-05	-0.1272	0.138548	0.0356309	0.679343	-0.017735	0.837027	0.00081871	0.992424	-0.014356	0.867762	-0.28879	0.0006206	-0.151978	0.0762507
RASA3	blue	-0.082743	0.336423	-0.029252	0.734367	0.123341	0.151024	0.0617079	0.473783	-0.0487206	0.571822	-0.0386646	0.653735	0.0234865	0.785298	-0.0927429	0.281075	0.0858027	0.318797	0.131641	0.125182	-0.0135562	0.875067	0.0018929	0.982486	0.146998	0.0865061	-0.456515	2.06117e-08	-0.397469	1.51475e-06	-0.0902427	0.294304	-0.0497359	0.563826	-0.0520441	0.545851	-0.0837676	0.330453	-0.0532175	0.536822	0.215996	0.0112448	0.270579	0.00138434
PRSS3P1	blue	-0.0210937	0.80672	0.0432992	0.615389	0.0804211	0.350204	-0.0398553	0.643792	0.0313173	0.716388	-0.060947	0.479263	-0.136967	0.110489	0.0530374	0.538203	-0.248956	0.00335066	-0.105678	0.219057	0.152958	0.0743522	0.0119067	0.890168	-0.161892	0.0587553	0.838089	2.4112e-37	0.360463	1.51273e-05	-0.156812	0.0672561	0.0508119	0.555412	0.0673769	0.434044	0.0110265	0.898241	0.0135859	0.874797	-0.255586	0.00257506	-0.187028	0.0286409
GMNN	blue	-0.198817	0.0198553	0.128203	0.135437	0.167536	0.0503663	-0.0784339	0.362275	0.0657077	0.445543	-0.0188061	0.827334	-0.0281668	0.743873	0.0454967	0.597555	0.0106706	0.901509	-0.0517619	0.548034	0.248637	0.00339283	0.0772392	0.369655	-0.139456	0.104102	0.684563	2.89433e-20	0.219539	0.00994823	-0.0901089	0.295023	-0.0249928	0.771894	-0.0634234	0.461553	-0.00623501	0.942354	-0.108183	0.208266	-0.245797	0.00378947	-0.232379	0.00628519
CELA3A	blue	-0.0401696	0.641177	0.00336439	0.968876	0.0398403	0.643917	-0.0844839	0.32632	-0.057167	0.506988	0.0253072	0.769105	-0.0356855	0.678879	0.160581	0.0608591	-0.243331	0.00416723	-0.108441	0.207177	0.00948211	0.912433	-0.0679509	0.43013	-0.156264	0.0682294	0.85109	1.3446e-39	0.32997	8.22728e-05	-0.041114	0.633348	0.0057109	0.947193	0.0459498	0.593907	0.0876183	0.308627	0.0546976	0.52554	-0.224025	0.00849712	-0.111162	0.195941
ADH1C	blue	0.0442226	0.607867	-0.030343	0.724851	-0.0913918	0.288173	-0.0961741	0.26358	-0.00234362	0.978316	0.137934	0.107972	0.0704497	0.413326	0.210737	0.013442	-0.397558	1.50587e-06	0.0903839	0.293546	-0.013202	0.878307	0.0737938	0.391451	0.0565916	0.51128	0.350599	2.6672e-05	0.14473	0.0915263	-0.12479	0.146244	-0.0180163	0.83448	0.0976328	0.256373	-0.100485	0.242676	-0.0944089	0.272486	-0.334221	6.56538e-05	0.182078	0.0332151
CHAD	blue	-0.023039	0.789293	0.0116198	0.892798	-0.0250589	0.771307	0.0565517	0.511579	0.0366678	0.670548	0.0655422	0.446692	0.0290486	0.736146	0.166491	0.0518391	-0.256136	0.00251869	0.11874	0.166978	0.0809912	0.346787	0.158934	0.0635912	0.244449	0.00399204	0.628099	2.11609e-16	0.166168	0.0523022	-0.252646	0.00289637	-0.0981032	0.254078	-0.112979	0.188685	-0.176109	0.0395394	-0.15443	0.0715729	-0.33927	4.9999e-05	-0.0053121	0.950876
MT-TP	blue	0.0282962	0.742738	-0.0997695	0.246062	-0.0707493	0.411337	-0.0948818	0.270081	-0.00144787	0.986603	-0.06032	0.483804	-0.084711	0.325016	0.0978413	0.255354	0.0717015	0.405055	0.210368	0.0136096	-0.0133873	0.876612	0.331044	7.77367e-05	0.34867	2.97341e-05	-0.150392	0.0794048	-0.197661	0.0205988	0.0472514	0.583484	-0.0773951	0.368687	-0.22666	0.00773475	-0.197367	0.0207919	-0.265224	0.00173493	-0.20655	0.015451	-0.0239795	0.780904
COQ8A	blue	0.016015	0.852644	-0.0419121	0.626763	0.247349	0.00356789	-0.00131547	0.987828	-0.0449622	0.601871	-0.00504567	0.953337	-0.0722229	0.401639	0.0861895	0.316613	-0.480435	2.82692e-09	-0.0551927	0.521794	0.327501	9.3655e-05	0.260478	0.00211121	0.154489	0.0714641	0.712392	1.65015e-22	0.361235	1.44589e-05	-0.266107	0.00167208	0.167972	0.0497607	0.0625532	0.467735	-0.105771	0.218649	-0.127459	0.137739	-0.520681	6.93378e-11	-0.190797	0.025528
GAMT	blue	-0.132119	0.123805	-0.0159789	0.852973	0.0658437	0.4446	-0.0476159	0.580581	-0.0440541	0.609236	-0.0693317	0.420796	-0.10991	0.201053	0.065126	0.44959	-0.428654	1.73393e-07	-0.160475	0.0610319	0.261531	0.00202183	0.209291	0.0141087	0.0201553	0.815161	0.869403	3.63999e-43	0.532718	2.07533e-11	-0.289647	0.000596812	0.162494	0.0578081	0.0216882	0.801383	-0.00600492	0.944478	0.011138	0.897218	-0.353203	2.30056e-05	-0.401002	1.19795e-06
E2F3	blue	0.003445	0.96813	0.0705332	0.412772	-0.0548082	0.524702	-0.0546988	0.525531	-0.0474466	0.581929	-0.040005	0.642546	-0.0184406	0.830639	0.00131961	0.98779	0.223053	0.00879437	-0.0227692	0.791703	-0.144924	0.0910878	-0.330913	7.82791e-05	0.0614276	0.475798	-0.408518	7.20533e-07	-0.22743	0.00752369	0.0491692	0.568283	-0.095176	0.268591	0.0134461	0.876075	0.0419115	0.626768	0.148504	0.0832939	0.24884	0.00336595	0.310944	0.000217079
DZIP1	blue	-0.0522558	0.544217	-0.0400472	0.642195	-0.143135	0.0951948	-0.109938	0.20094	0.0337859	0.695101	0.0291077	0.735629	-0.0426781	0.620471	0.153526	0.0732698	-0.45118	3.14564e-08	-0.445617	4.85046e-08	-0.0833226	0.333037	-0.192513	0.0242099	-0.0865575	0.314543	0.556282	1.69657e-12	0.479383	3.09509e-09	-0.0438644	0.61078	0.252923	0.00286468	0.165639	0.0530669	0.325632	0.000103227	0.491106	1.10791e-09	0.200268	0.0189545	-0.343894	3.88019e-05
SLC25A15	blue	0.0385003	0.655113	0.127623	0.13723	0.117979	0.169737	-0.0445243	0.605418	0.00682427	0.936917	0.0184102	0.830914	-0.0558129	0.517119	0.148674	0.0829372	0.058593	0.496432	0.162089	0.0584446	-0.0547898	0.524842	-0.23822	0.00505946	-0.153104	0.074073	0.425159	2.23517e-07	0.0376241	0.662476	-0.105048	0.221833	-0.330084	8.1779e-05	-0.0963939	0.262486	-0.175194	0.0405923	-0.0713938	0.407079	-0.138171	0.107363	0.322595	0.000120757
CELA3B	blue	-0.0540881	0.530172	0.016321	0.849862	0.0518464	0.54738	-0.0900695	0.295235	-0.0432521	0.615773	-0.00133917	0.987609	-0.0554428	0.519906	0.141941	0.0980182	-0.26431	0.00180223	-0.116852	0.173876	0.045515	0.597408	-0.0551438	0.522163	-0.149814	0.0805793	0.885118	1.09744e-46	0.339108	5.04412e-05	-0.0761373	0.376543	0.0219789	0.798777	0.0410704	0.633709	0.0711249	0.408853	0.0532993	0.536196	-0.234172	0.0058835	-0.130778	0.127697
SLC5A9	blue	0.0714876	0.406461	-0.0824459	0.338167	-0.15901	0.0634622	-0.0102329	0.90553	-0.0212387	0.805417	-0.0283659	0.742127	-0.132481	0.122769	0.146215	0.0882133	-0.508077	2.33336e-10	-0.184951	0.0304905	-0.0344821	0.689139	-0.011121	0.897374	0.0866181	0.314203	0.57814	1.38518e-13	0.313924	0.00018726	-0.132047	0.124012	0.156336	0.0681007	0.107949	0.209259	0.0340257	0.693045	0.16388	0.0556785	-0.182691	0.032617	-0.0793091	0.356927
CTH	blue	-0.0811625	0.345766	0.26619	0.00166628	0.130364	0.128918	0.016874	0.844837	0.00107236	0.990077	0.0359213	0.676876	0.0280849	0.744593	0.135012	0.115716	0.157407	0.0662109	0.0734549	0.393636	0.0847708	0.324673	-0.15671	0.0674364	-0.239974	0.00473569	0.292303	0.000528299	0.0597869	0.487684	-0.104107	0.226024	-0.234321	0.00585126	-0.109071	0.204534	-0.100016	0.244893	-0.0271266	0.753022	-0.0703586	0.413932	0.0216228	0.80197
RBP1	blue	-0.0647222	0.452411	0.0198736	0.817698	0.03094	0.719662	-0.0198394	0.818007	0.0431645	0.61649	-0.15804	0.0651149	-0.127203	0.138537	0.0335753	0.696908	-0.0626628	0.466954	-0.242736	0.00426326	0.187614	0.0281367	0.141785	0.098391	-0.221489	0.00929247	0.569122	3.982e-13	0.388688	2.6831e-06	-0.113536	0.186499	0.179595	0.0357335	-0.0187737	0.827627	0.132062	0.123967	0.124433	0.147411	-0.0370738	0.667116	-0.617588	9.11405e-16
RNF212	blue	-0.0640295	0.457274	0.0448173	0.603044	0.103599	0.228308	0.0603244	0.483772	0.125364	0.144383	0.0102022	0.905812	-0.0578233	0.502115	0.0107153	0.901098	-0.227235	0.00757678	-0.317208	0.000158843	0.206977	0.015235	-0.0158174	0.854443	-0.275155	0.00113732	0.634552	8.39535e-17	0.430315	1.53526e-07	-0.121447	0.157446	0.206535	0.015459	0.101633	0.237307	0.222086	0.00909949	0.210236	0.0136699	0.0156581	0.855893	-0.438799	8.16177e-08
EMB	blue	0.128042	0.135932	-0.0340854	0.692534	-0.188108	0.0277174	0.0384917	0.655185	-0.0972465	0.258268	0.0227894	0.791523	0.0572884	0.506085	-0.0429442	0.618292	0.0513045	0.551581	-0.0721712	0.401977	-0.0505145	0.557732	-0.293301	0.000504478	0.0324381	0.706695	-0.444082	5.45889e-08	-0.190916	0.0254346	0.25079	0.00311739	0.156259	0.0682396	0.0873511	0.310109	0.00513429	0.952518	0.0448148	0.603065	0.0103026	0.904889	0.39597	1.672e-06
TSC22D1	blue	-0.0596763	0.488491	0.119054	0.165852	-0.105732	0.218819	-0.0387994	0.652606	-0.0996011	0.246863	0.0406491	0.637197	0.0496355	0.564615	0.0377942	0.661043	0.0728666	0.397445	0.132599	0.122433	-0.204326	0.016621	-0.1558	0.0690639	0.0075809	0.92994	-0.420548	3.11124e-07	-0.190088	0.0260906	-0.0333587	0.698768	-0.211551	0.0130789	-0.117649	0.17094	-0.0677131	0.431749	0.0959242	0.264829	0.265242	0.00173363	0.265682	0.00170203
KSR1	blue	-0.00662963	0.938713	-0.135529	0.114315	0.0186147	0.829064	-0.0793732	0.356538	-0.0664054	0.440716	-0.0144845	0.86659	-0.0162858	0.850182	0.105471	0.219967	-0.495457	7.49178e-10	-0.409573	6.70255e-07	-0.0165936	0.847384	-0.198613	0.0199848	0.11761	0.171083	0.568632	4.21328e-13	0.422598	2.68739e-07	-0.231978	0.00637843	0.318194	0.000151128	0.211397	0.0131473	0.219432	0.00998551	0.368209	9.5626e-06	-0.0677542	0.431469	-0.11514	0.180315
WDR91	blue	-0.110306	0.199427	-0.137604	0.108826	0.0718294	0.404215	-0.00819437	0.924287	0.0887734	0.302267	-0.0142842	0.868418	0.00336348	0.968884	0.133181	0.120786	-0.253953	0.00274926	-0.250477	0.00315612	0.190364	0.0258699	0.172079	0.0443564	0.303001	0.000319404	0.375067	6.30801e-06	0.233345	0.00606599	-0.109676	0.20202	0.227058	0.00762492	0.0723886	0.400557	0.185789	0.0297323	0.0993316	0.248151	-0.0757421	0.379033	-0.394936	1.78938e-06
NEDD4L	blue	0.0223084	0.795826	0.228582	0.00721754	-0.0303625	0.724681	-0.0106249	0.901928	0.0779556	0.365219	0.0530849	0.537839	0.0141446	0.869692	0.07792	0.365439	0.0987626	0.250884	0.353353	2.28093e-05	0.0355295	0.680206	0.0473486	0.582709	-0.200584	0.018763	0.527273	3.60272e-11	0.0526293	0.541339	-0.127012	0.139138	-0.404159	9.69091e-07	-0.279641	0.000934934	-0.281247	0.000870929	-0.345864	3.47862e-05	-0.407869	7.53234e-07	0.170127	0.0468608
MT-ND6	blue	0.116031	0.176943	-0.0963412	0.262748	-0.232557	0.00624442	-0.0774226	0.368516	-0.0320445	0.710094	-0.0154501	0.857786	-0.0373539	0.664752	0.00222192	0.979442	-0.215866	0.0112951	0.000137119	0.998731	-0.288726	0.000622404	0.0533682	0.535668	0.234846	0.0057385	-0.246858	0.00363672	-0.00789584	0.927037	0.0136386	0.874315	0.0645945	0.453306	-0.00646788	0.940205	0.0621602	0.470542	0.0805875	0.349205	0.0395655	0.646206	0.062797	0.465998
ACTB	blue	0.0343911	0.689918	-0.0157529	0.85503	-0.0580744	0.500258	0.0340766	0.692609	0.0280333	0.745046	-0.00586862	0.945737	0.0241357	0.779513	-0.100203	0.244004	0.481299	2.6235e-09	0.140761	0.100871	-0.171293	0.0453511	-0.0810592	0.346382	-0.097668	0.256201	-0.79818	1.6537e-31	-0.470531	6.55558e-09	0.201661	0.0181232	-0.136761	0.111031	-0.103953	0.226713	0.0848997	0.323935	0.00552587	0.948901	0.439589	7.68862e-08	0.176079	0.0395736
PDGFA	blue	0.0114228	0.894605	-0.0220972	0.797717	-0.0316825	0.713225	-0.109116	0.204349	-0.116142	0.176525	0.0413216	0.631632	-0.0552953	0.521019	0.0295684	0.731604	-0.192757	0.0240273	0.209909	0.0138201	0.021742	0.800901	0.252537	0.00290892	0.0548065	0.524715	0.358877	1.65927e-05	0.123699	0.149831	-0.17376	0.0422911	-0.204788	0.0163718	-0.22735	0.00754553	-0.151165	0.0778536	-0.142901	0.0957433	-0.136333	0.112163	-0.0790231	0.35867
TIFA	blue	-0.0300057	0.727789	0.0779244	0.365412	0.14943	0.0813672	-0.155016	0.0704919	-0.0354492	0.680889	0.089849	0.296424	0.056511	0.511883	0.0944505	0.272273	-0.0308972	0.720033	-0.402672	1.07113e-06	0.247909	0.00349072	-0.274558	0.00116708	-0.27136	0.00133898	0.45979	1.58438e-08	0.117499	0.17149	0.0146529	0.865053	0.325376	0.000104606	0.312183	0.000204185	0.196614	0.0212932	0.183028	0.0322918	-0.0185741	0.829431	-0.178867	0.0365019
TMSB4X	blue	-0.0713958	0.407066	-0.0154169	0.858089	-0.163558	0.0561678	0.0683347	0.427524	0.0228721	0.790784	0.00462773	0.957198	-0.0105841	0.902304	-0.0701704	0.415185	0.250891	0.00310495	0.0102345	0.905515	-0.102812	0.231879	0.0565174	0.511836	-0.0297787	0.729768	-0.552683	2.51879e-12	-0.247742	0.0035136	0.195951	0.0217432	0.0868193	0.313075	-0.0853463	0.321388	0.0623636	0.469088	0.0186828	0.828449	0.276626	0.00106692	-0.0485881	0.572869
MAATS1	blue	-0.0879905	0.306568	0.118776	0.166849	-0.0687224	0.4249	0.0083212	0.923118	0.0812649	0.345155	-0.0412789	0.631985	-0.0546744	0.525716	-0.00628417	0.941901	-0.197332	0.0208149	0.132749	0.122007	-0.0296549	0.730849	-0.0236472	0.783865	0.0895767	0.297896	0.471178	6.20984e-09	0.208251	0.0146053	-0.0170267	0.843451	-0.191857	0.0247063	-0.196579	0.0213169	-0.127143	0.138726	-0.101177	0.23943	-0.289724	0.000594701	0.144958	0.0910113
AC092979.1	blue	-0.0770756	0.370673	0.0597023	0.488301	0.0706162	0.412221	-0.0757442	0.379019	0.0558384	0.516927	-0.0200093	0.816475	-0.0548501	0.524385	0.103849	0.22718	-0.246278	0.00371948	-0.0752241	0.382311	0.207403	0.0150218	0.0767266	0.37285	0.0316557	0.713457	0.891	3.87483e-48	0.338017	5.35189e-05	-0.125268	0.144692	0.0175643	0.838575	-0.0861624	0.316765	-0.0155799	0.856605	-0.0480072	0.577471	-0.330304	8.08343e-05	-0.214656	0.0117725
WNK2	blue	0.0271641	0.752691	-0.0503718	0.558846	0.0222465	0.796381	0.0393537	0.647973	0.0922087	0.283868	-0.0085992	0.920558	-0.103157	0.23031	0.12968	0.130956	-0.326205	0.000100201	0.0361022	0.675341	0.0107434	0.90084	0.17648	0.0391182	0.124005	0.148818	0.780862	2.27722e-29	0.330963	7.8072e-05	-0.182533	0.0327704	-0.0683134	0.427668	-0.102602	0.232839	-0.089178	0.30006	-0.0822297	0.339439	-0.374306	6.60918e-06	-0.123197	0.151502
PRSS1	blue	-0.0160059	0.852727	0.0245306	0.776001	0.0797536	0.35423	-0.0420798	0.625384	-0.0519023	0.546947	-0.00357057	0.966969	-0.0634045	0.461687	0.108733	0.205951	-0.247943	0.00348608	-0.049022	0.569443	0.019584	0.82031	-0.0559968	0.515737	-0.140066	0.102581	0.849255	2.88006e-39	0.307108	0.000261939	-0.076325	0.375365	-0.0439505	0.610079	0.0395767	0.646113	0.023564	0.784607	0.0085508	0.921004	-0.256833	0.00244883	-0.0462513	0.591486
ST6GALNAC2	blue	-0.070958	0.409956	-0.0109449	0.898991	0.00614807	0.943157	-0.0365813	0.67128	0.15524	0.0700819	-0.140738	0.100928	-0.0503699	0.558861	0.0288563	0.737829	0.284008	0.000770161	0.132325	0.123215	-0.0699376	0.416738	0.146366	0.0878832	-0.134424	0.117327	0.360428	1.51584e-05	0.00306091	0.971682	0.109329	0.20346	-0.193151	0.0237348	-0.109603	0.202323	-0.0168372	0.845172	-0.159277	0.0630142	-0.0793858	0.356461	-0.230364	0.00676579
CNDP2	blue	-0.0496751	0.564303	0.043092	0.617082	-0.0134933	0.875643	-0.14844	0.0834286	0.0206638	0.810584	0.0297403	0.730103	0.0425979	0.621129	0.170475	0.0464058	-0.249398	0.00329312	-0.271473	0.00133253	-0.0204263	0.81272	-0.171286	0.0453607	-0.222254	0.00904585	0.487792	1.4871e-09	0.35041	2.69578e-05	0.0472268	0.58368	0.172988	0.0432292	0.263519	0.00186244	0.247844	0.00349967	0.150877	0.0784278	-0.185378	0.0301018	-0.0902372	0.294333
RAB4B	brown	0.0435798	0.613099	-0.158251	0.0647525	0.0294851	0.732331	0.0959253	0.264824	-0.0613461	0.476385	-0.121895	0.155908	0.00362089	0.966504	-0.154	0.0723772	0.0493156	0.56713	0.353704	2.23564e-05	0.177621	0.0378489	0.79395	5.74952e-31	0.442186	6.31161e-08	-0.141492	0.0990957	-0.265885	0.00168764	0.0863055	0.315959	-0.00596275	0.944868	-0.292082	0.000533693	-0.194659	0.0226435	-0.56018	1.09979e-12	-0.284908	0.000739699	-0.235773	0.00554428
SPCS2	brown	-0.117291	0.172257	0.16883	0.0485896	-0.00149753	0.986143	-0.0392507	0.648833	0.0102541	0.905335	-0.0949182	0.269896	-0.0575092	0.504445	0.0394492	0.647176	0.143045	0.0954053	-0.113561	0.186402	0.0431348	0.616732	-0.409846	6.5782e-07	-0.423874	2.45212e-07	0.23884	0.00494278	0.0946233	0.271393	0.0324838	0.706301	-0.123677	0.149903	0.03991	0.643336	-0.00310566	0.971268	0.157864	0.0654175	0.108765	0.205815	0.0333695	0.698675
SNORD99	brown	-0.00972727	0.910178	-0.107108	0.212852	-0.0526423	0.541239	0.177548	0.0379284	-0.0330493	0.701428	-0.0193018	0.822856	0.0239055	0.781563	-0.033067	0.701276	0.117804	0.170375	0.363711	1.24985e-05	0.267669	0.00156588	0.72386	1.63533e-23	0.632814	1.0793e-16	-0.0560556	0.515296	-0.265079	0.00174548	-0.0152637	0.859484	-0.0935236	0.277028	-0.356297	1.92657e-05	-0.314044	0.000186147	-0.54885	3.81718e-12	-0.342728	4.13794e-05	-0.230856	0.00664555
CBL	brown	0.0547848	0.524879	0.0640128	0.457392	-0.152529	0.0751784	0.0193323	0.822581	-0.0273399	0.751143	0.0400441	0.642221	0.0683497	0.427422	0.0101883	0.90594	0.053218	0.536818	-0.339854	4.84337e-05	-0.265217	0.00173541	-0.673028	2.09001e-19	-0.113207	0.187786	-0.282586	0.000820645	-0.0246972	0.77452	0.0518981	0.546979	0.150166	0.0798622	0.248953	0.00335106	0.198752	0.0198964	0.460478	1.49875e-08	0.299733	0.000373246	0.308268	0.000247539
SMAP1	brown	-0.0696286	0.418805	0.157336	0.0663363	-0.008879	0.917982	-0.0697679	0.417872	-0.0683905	0.427145	0.163884	0.0556724	0.0738018	0.391399	0.105176	0.221266	0.0626021	0.467386	0.0070746	0.934608	-0.182272	0.0330251	-0.449879	3.48322e-08	-0.372507	7.37611e-06	0.176895	0.0386523	0.0928968	0.280274	-0.070872	0.410525	-0.242189	0.0043534	-0.0170457	0.843279	0.0515436	0.549725	0.138149	0.107418	0.0682726	0.427945	0.34575	3.50073e-05
ATP6AP2	brown	0.000399265	0.996305	0.0406615	0.637094	-0.161981	0.0586144	-0.150657	0.0788689	0.0322911	0.707964	0.0360541	0.675748	-0.0856247	0.319806	0.0575887	0.503855	-0.106068	0.217353	-0.530704	2.54795e-11	-0.411069	6.04663e-07	-0.768112	6.47987e-28	-0.504791	3.17602e-10	-0.0841806	0.328065	0.307422	0.00025797	0.196951	0.0210677	0.177924	0.037517	0.284121	0.000766279	0.510015	1.94245e-10	0.708655	3.42076e-22	0.53116	2.43261e-11	0.0995766	0.24698
FLYWCH2	brown	0.107827	0.209775	-0.181065	0.0342238	-0.0172947	0.84102	-0.016401	0.849135	-0.0554433	0.519902	-0.0176822	0.837506	-0.0582586	0.498897	-0.0310523	0.718686	-0.0743239	0.388048	0.110045	0.200499	0.128521	0.134463	0.679794	6.62554e-20	0.124669	0.146639	0.0671204	0.4358	-0.0619105	0.47233	-0.10522	0.221072	0.0783141	0.363011	-0.105736	0.218801	-0.0460107	0.593418	-0.242705	0.00426836	-0.0391983	0.649271	-0.499537	5.16467e-10
MZT2A	brown	-0.011488	0.894007	-0.0272278	0.75213	0.144556	0.0919221	0.0738657	0.390988	0.0916237	0.286947	-0.0781814	0.363827	-0.117175	0.172684	-0.0374396	0.66403	0.34435	3.78349e-05	0.571275	3.10378e-13	0.303579	0.00031067	0.853794	4.29207e-40	0.310766	0.000218988	-0.0559271	0.516261	-0.391801	2.19499e-06	-0.189088	0.0269012	-0.288263	0.000635653	-0.407726	7.60649e-07	-0.45917	1.66567e-08	-0.690014	1.10131e-20	-0.26714	0.00160116	-0.246114	0.00374318
RECQL5	brown	0.0297613	0.72992	-0.0258958	0.76389	0.0293338	0.733653	0.0581704	0.499549	0.0579721	0.501014	-0.0609052	0.479565	0.0387626	0.652915	-0.00911778	0.915784	0.272103	0.00129709	0.465236	1.01667e-08	0.0900073	0.29557	0.604963	4.90713e-15	0.474372	4.74577e-09	-0.194434	0.0228032	-0.37713	5.55553e-06	-0.083117	0.334235	-0.209114	0.0141921	-0.240878	0.00457624	-0.349079	2.90595e-05	-0.547962	4.20008e-12	-0.245874	0.00377817	-0.10952	0.202667
LEMD2	brown	-0.0134518	0.876022	-0.101897	0.236082	0.0704207	0.413519	0.0772397	0.369652	0.0409187	0.634964	-0.159391	0.0628228	-0.212528	0.0126549	-0.096365	0.262629	0.143028	0.0954459	0.190177	0.026019	0.123971	0.14893	0.57581	1.82547e-13	0.353988	2.1996e-05	0.0295347	0.731898	-0.202803	0.0174661	-0.169614	0.0475379	-0.0286574	0.739572	-0.198282	0.0201964	-0.207872	0.0147904	-0.282518	0.000823115	-0.0471897	0.583976	-0.341905	4.32937e-05
HAUS7	brown	-0.0836599	0.331077	-0.0396735	0.645306	0.129462	0.131612	0.0698819	0.41711	0.0327994	0.70358	-0.0206958	0.810296	0.0338956	0.69416	-0.150312	0.0795654	0.184421	0.0309777	0.146	0.0886867	0.49089	1.12942e-09	0.681381	5.03821e-20	0.225651	0.00801921	-0.0927244	0.281172	-0.163313	0.0565414	0.00425139	0.960676	0.115218	0.180018	-0.177077	0.0384492	-0.155967	0.0687638	-0.44025	7.31335e-08	-0.220211	0.00971791	-0.478974	3.20565e-09
WDR90	brown	0.00719566	0.933492	0.00706089	0.934735	0.136238	0.112415	0.175738	0.0399631	0.129146	0.132563	-0.0409875	0.634394	-0.00838526	0.922528	0.0185894	0.829293	0.232094	0.00635136	0.697493	2.82365e-21	0.0223767	0.795215	0.702117	1.19181e-21	0.6547	4.05155e-18	-0.0754697	0.380754	-0.430855	1.47555e-07	-0.0437386	0.611804	-0.490888	1.12963e-09	-0.490356	1.18456e-09	-0.520977	6.73548e-11	-0.684364	2.99691e-20	-0.30318	0.000316683	0.133267	0.120545
MZT2B	brown	-0.0523542	0.543458	-0.16696	0.051174	0.0776148	0.367325	0.0270733	0.753491	0.0635635	0.460562	-0.0188181	0.827225	-0.0714575	0.40666	-0.0226292	0.792956	0.133211	0.120701	0.411698	5.78928e-07	0.207866	0.014793	0.83522	7.12483e-37	0.382232	4.04266e-06	0.0468924	0.586351	-0.27018	0.00140805	-0.14777	0.0848475	-0.129878	0.130363	-0.332147	7.33218e-05	-0.338525	5.2067e-05	-0.572351	2.73838e-13	-0.294213	0.000483576	-0.290382	0.000577057
ULK1	brown	-0.01017	0.906108	-0.091325	0.288528	0.0550064	0.523202	0.0560619	0.515249	0.138225	0.107223	0.000885714	0.991804	-0.0477693	0.579361	0.0151999	0.860066	-0.0679964	0.42982	0.185391	0.03009	-0.0466383	0.588383	0.533944	1.83048e-11	0.485838	1.76638e-09	0.197923	0.0204282	-0.044932	0.602116	-0.170484	0.0463943	-0.0715178	0.406262	-0.247812	0.00350395	-0.19068	0.0256199	-0.20644	0.0155071	-0.0745979	0.386296	-0.268799	0.00149294
ANAPC1	brown	-0.0397945	0.644298	0.159106	0.0633015	0.147513	0.0853961	0.0931685	0.278864	0.0984472	0.252408	0.0404715	0.63867	0.021052	0.807094	0.0479574	0.577866	0.373512	6.93786e-06	0.00435957	0.959676	-0.0648441	0.451559	-0.604232	5.39734e-15	-0.388881	2.65013e-06	-0.197646	0.020609	-0.11128	0.195462	0.131567	0.125396	-0.228912	0.00713199	0.0667435	0.438387	0.00898978	0.916962	0.126599	0.140438	0.133662	0.119438	0.443896	5.53733e-08
NDUFA3	brown	0.104564	0.223979	0.0189393	0.82613	0.208776	0.0143528	0.0236251	0.784062	-0.0337613	0.695312	-0.0564748	0.512154	-0.0354329	0.681028	-0.115813	0.177764	0.104295	0.225179	0.24189	0.00440332	0.53773	1.23816e-11	0.60354	5.90516e-15	0.0972984	0.258013	0.0749254	0.384208	-0.0752736	0.381997	-0.0219858	0.798715	-0.0183767	0.831217	-0.155574	0.069473	-0.136514	0.111684	-0.482449	2.37462e-09	-0.318544	0.000148476	-0.366026	1.08949e-05
DCAF7	brown	0.0777752	0.366333	0.0217077	0.801209	-0.199009	0.0197341	-0.131333	0.126075	-0.0212369	0.805433	0.0708603	0.410602	0.0511812	0.552538	0.118065	0.169423	-0.198591	0.019999	-0.404929	9.19954e-07	-0.352415	2.40612e-05	-0.678234	8.65913e-20	-0.215302	0.0115153	0.0398159	0.64412	0.209787	0.0138765	0.0679019	0.430463	0.190021	0.0261444	0.395713	1.70054e-06	0.338218	5.29404e-05	0.524732	4.64465e-11	0.195377	0.0221389	0.288546	0.000627523
TSC2	brown	0.0247833	0.773754	-0.0835643	0.331632	0.105792	0.218559	0.170826	0.0459515	0.0831105	0.334274	0.0193422	0.822492	0.0189628	0.825918	-0.0367471	0.669877	-0.0942024	0.273541	0.409977	6.51899e-07	-0.0555992	0.518727	0.527447	3.54032e-11	0.630609	1.48075e-16	-0.0488129	0.571092	-0.211495	0.0131038	-0.146313	0.0879978	-0.249924	0.00322562	-0.35153	2.53013e-05	-0.300405	0.000361542	-0.35705	1.84466e-05	-0.157365	0.0662844	0.0659695	0.443728
METTL22	brown	-0.0017066	0.984209	0.0518757	0.547153	0.153487	0.0733431	0.0718977	0.403767	0.0756561	0.379576	-0.0943109	0.272986	0.0701375	0.415404	-0.00624396	0.942272	0.389237	2.59009e-06	0.406189	8.44592e-07	0.293614	0.000497224	0.598338	1.15278e-14	0.356223	1.93472e-05	-0.203113	0.0172912	-0.468033	8.07087e-09	0.0246805	0.774667	-0.263886	0.00183426	-0.400539	1.2355e-06	-0.285159	0.000731407	-0.475614	4.27152e-09	-0.0204644	0.812378	-0.236428	0.00541058
ZNF598	brown	-0.0359771	0.676402	-0.0609486	0.479251	0.195975	0.0217265	0.131124	0.126683	0.0980996	0.254095	0.00109984	0.989823	-0.0210791	0.806851	-0.0178741	0.835767	0.180415	0.034884	0.472743	5.44529e-09	0.147145	0.0861881	0.749314	6.21841e-26	0.43281	1.27718e-07	-0.0742163	0.388737	-0.323768	0.000113681	-0.0856546	0.319636	-0.208596	0.0144389	-0.323911	0.000112843	-0.378312	5.16365e-06	-0.583235	7.51914e-14	-0.257182	0.00241447	-0.0908098	0.291268
AP005233.2	brown	-0.0853821	0.321184	-0.0257835	0.764885	-0.0620401	0.471401	0.214072	0.012009	0.135962	0.113153	-0.0777677	0.366379	0.00731252	0.932414	-0.0139053	0.871878	0.294437	0.00047858	0.56609	5.63923e-13	0.0885715	0.303372	0.564552	6.7185e-13	0.480377	2.84118e-09	-0.177705	0.0377562	-0.330445	8.02365e-05	0.111306	0.195357	-0.313848	0.000187971	-0.433487	1.21472e-07	-0.400095	1.27264e-06	-0.60077	8.44492e-15	-0.28658	0.000686041	0.0903992	0.293464
SPNS1	brown	-0.0548097	0.524691	-0.225686	0.00800914	0.0930187	0.279641	0.139525	0.103929	0.139325	0.104431	-0.0332437	0.699757	-0.0144859	0.866577	-0.108	0.209043	0.244378	0.00400289	0.322646	0.000120437	-0.0698761	0.417149	0.428573	1.74421e-07	0.365031	1.15591e-05	-0.231762	0.00642917	-0.404042	9.76745e-07	-0.0304982	0.723501	-0.212951	0.012475	-0.270457	0.00139154	-0.171351	0.0452776	-0.350935	2.61693e-05	-0.0424101	0.622669	0.0388105	0.652514
MOB1A	brown	0.00362569	0.96646	-0.0183649	0.831324	-0.159872	0.0620231	-0.0652911	0.448439	-0.0707522	0.411318	0.0307652	0.72118	0.00403733	0.962654	0.0715714	0.40591	-0.0114665	0.894204	-0.410404	6.33021e-07	-0.302754	0.000323214	-0.690452	1.01793e-20	-0.147998	0.0843625	-0.313004	0.000196037	-0.051444	0.550497	0.246536	0.00368247	0.277971	0.00100608	0.363136	1.29304e-05	0.269997	0.00141901	0.488027	1.45652e-09	0.344831	3.68393e-05	0.332877	7.05324e-05
BCS1L	brown	0.00400703	0.962934	-0.0889327	0.301397	0.301981	0.000335389	0.16499	0.0540179	0.124657	0.146678	-0.0884979	0.303776	-0.0602271	0.484479	-0.00631717	0.941596	0.279985	0.000920883	0.523872	5.05938e-11	0.448719	3.81337e-08	0.697519	2.81026e-21	0.42367	2.48839e-07	-0.00879236	0.91878	-0.242364	0.00432441	-0.0991486	0.249028	-0.301845	0.000337579	-0.417509	3.85835e-07	-0.465623	9.84867e-09	-0.669187	3.95837e-19	-0.424208	2.39397e-07	-0.172329	0.0440444
KLF16	brown	0.0299133	0.728594	0.00551478	0.949004	0.0835144	0.331922	0.0926318	0.281655	0.0990054	0.249715	-0.0441439	0.608506	0.0332276	0.699896	-0.118264	0.168699	0.267921	0.00154938	0.452146	2.91525e-08	0.355437	2.0243e-05	0.572909	2.56576e-13	0.147145	0.0861875	-0.256229	0.00250922	-0.277837	0.00101198	-0.0663962	0.440779	-0.213379	0.0122954	-0.323703	0.000114062	-0.342375	4.21906e-05	-0.54902	3.74793e-12	-0.259542	0.00219362	-0.0605527	0.482116
SUSD1	brown	0.0283064	0.742648	0.00719102	0.933535	-0.158342	0.064596	-0.103365	0.229367	-0.00456615	0.957767	0.0659183	0.444083	0.0716437	0.405435	0.0971997	0.258499	-0.0592401	0.49168	-0.248156	0.00345719	-0.345033	3.64286e-05	-0.532842	2.04921e-11	-0.41774	3.79594e-07	-0.0332595	0.699621	0.258207	0.00231619	0.00476209	0.955956	0.0668104	0.437928	0.285478	0.000720989	0.305289	0.000286096	0.360833	1.48034e-05	0.21314	0.0123953	0.205595	0.0159444
LNPK	brown	0.00590934	0.945361	0.16179	0.0589158	0.0142544	0.86869	-0.0183278	0.83166	0.0616805	0.47398	0.0206569	0.810646	-0.0584446	0.497525	0.0168628	0.844939	0.44781	4.09296e-08	0.234953	0.00571572	-0.389302	2.57929e-06	-0.488415	1.40741e-09	-0.353369	2.27888e-05	-0.315395	0.000173995	-0.158037	0.06512	0.0456314	0.59647	-0.497863	6.01971e-10	-0.140539	0.101415	-0.112315	0.191311	0.0779058	0.365526	0.297767	0.000409548	0.480408	2.83359e-09
AC004967.1	brown	-0.0531224	0.537551	-0.0507892	0.555589	0.0436414	0.612596	0.0733504	0.39431	0.0657695	0.445114	-0.0411216	0.633285	0.0616414	0.474261	0.0667638	0.438248	0.114201	0.183917	0.445222	5.00054e-08	0.270189	0.0014075	0.715035	9.78474e-23	0.595788	1.59303e-14	0.0765139	0.374181	-0.286606	0.000685227	-0.144687	0.0916257	-0.179937	0.0353766	-0.381539	4.22251e-06	-0.400315	1.25409e-06	-0.622274	4.78529e-16	-0.459702	1.59566e-08	-0.118567	0.167603
HGS	brown	-0.0358061	0.677854	-0.0887988	0.302128	0.02889	0.737534	0.114132	0.184184	0.0603176	0.483822	-0.0303834	0.724499	0.0204748	0.812285	0.0104039	0.903958	0.284791	0.000743615	0.497796	6.05662e-10	-0.114031	0.184574	0.506796	2.63239e-10	0.518633	8.47443e-11	-0.221182	0.00939336	-0.426536	2.02304e-07	-0.0901493	0.294806	-0.350815	2.6348e-05	-0.349996	2.75954e-05	-0.354755	2.10511e-05	-0.452852	2.75732e-08	-0.122942	0.15236	0.0762305	0.375958
AL450384.2	brown	0.0909107	0.29073	-0.113374	0.187135	0.0193432	0.822483	-0.0260918	0.762156	-0.0137375	0.873411	-0.0585013	0.497108	0.0388785	0.651945	0.0574518	0.504871	-0.191058	0.0253239	0.103268	0.229805	0.248933	0.00335375	0.543977	6.42683e-12	0.535186	1.61107e-11	0.202093	0.017872	0.0636911	0.45966	-0.0699197	0.416858	0.134113	0.118186	-0.140433	0.101676	-0.274824	0.00115375	-0.312936	0.000196697	-0.416364	4.18199e-07	-0.295307	0.000459567
SDR39U1	brown	-0.000189637	0.998245	-0.161992	0.0585973	0.103195	0.230137	-0.0163911	0.849225	0.0325276	0.705923	-0.0197072	0.819199	0.0530728	0.537932	0.0823388	0.338797	-0.0035901	0.966789	0.20708	0.015183	0.287428	0.00066021	0.693923	5.43501e-21	0.682037	4.49695e-20	0.00147337	0.986367	-0.200122	0.0190438	-0.0141933	0.869248	0.0813224	0.344813	-0.248512	0.00340939	-0.309163	0.000236936	-0.464746	1.05842e-08	-0.40179	1.13642e-06	-0.252573	0.00290485
CRIM1	brown	0.0459623	0.593807	0.0263725	0.759676	-0.177104	0.0384197	-0.0845755	0.325793	-0.00757762	0.92997	0.113872	0.185191	0.0328554	0.703098	0.0644873	0.454057	-0.334715	6.3939e-05	-0.230492	0.00673428	-0.409314	6.82303e-07	-0.732932	2.41529e-24	-0.151765	0.0766681	0.073081	0.396055	0.161154	0.0599315	0.0142252	0.868956	-0.073717	0.391945	0.128199	0.135449	0.161785	0.0589241	0.531324	2.39234e-11	0.240416	0.00465714	0.492135	1.0105e-09
TEPSIN	brown	-0.000251611	0.997672	-0.207083	0.0151817	0.0463652	0.590571	0.118663	0.167256	-0.0574168	0.505131	-0.0424039	0.62272	0.0831314	0.334151	-0.00151512	0.985981	0.00142226	0.98684	0.258705	0.00226972	0.23281	0.00618643	0.759765	5.17741e-27	0.717445	6.04307e-23	-0.0712616	0.40795	-0.305094	0.000288809	-0.107371	0.211723	0.0913958	0.288153	-0.221094	0.00942228	-0.27343	0.00122527	-0.472397	5.60599e-09	-0.342007	4.30519e-05	-0.268353	0.0015214
DDT	brown	-0.00956124	0.911705	0.01441	0.867269	0.242088	0.00437017	-0.00618548	0.942812	-0.0599103	0.486784	-0.0457906	0.595188	-0.0402089	0.64085	-0.0427711	0.619709	0.0921664	0.28409	0.228072	0.00735179	0.335663	6.0767e-05	0.621397	5.40314e-16	0.0323854	0.70715	0.343112	4.05119e-05	0.0383034	0.656764	-0.192468	0.0242436	-0.0661604	0.442408	-0.146261	0.088112	-0.241816	0.00441582	-0.400405	1.2466e-06	-0.285119	0.000732732	-0.470776	6.42253e-09
MIR4740	brown	-0.0236876	0.783505	-0.0444607	0.605934	0.0547099	0.525447	0.101555	0.237666	0.0208426	0.808976	-0.106134	0.217064	-0.0395642	0.646217	-0.14326	0.0949036	0.0509516	0.554324	0.339176	5.0256e-05	0.236372	0.00542188	0.623536	4.01576e-16	0.243315	0.00416985	0.0314446	0.715285	-0.0872537	0.310651	-0.103732	0.227707	-0.150157	0.0798793	-0.311065	0.00021578	-0.253822	0.00276379	-0.453036	2.71767e-08	-0.256206	0.00251152	-0.189552	0.0265229
RELB	brown	0.118241	0.168782	-0.189008	0.0269678	0.0177716	0.836696	-0.0758947	0.378071	0.109503	0.202736	0.00883797	0.91836	0.0421009	0.62521	-0.0353458	0.68177	0.0999725	0.245097	0.120596	0.160399	0.0524925	0.542392	0.533339	1.94758e-11	0.155191	0.0701701	-0.114717	0.181931	-0.185405	0.0300777	0.230659	0.00669351	0.147763	0.0848616	-0.0545922	0.526339	-0.00849423	0.921525	-0.317219	0.000158751	-0.134382	0.117441	-0.255153	0.00262025
ATG2B	brown	-0.0270635	0.753578	0.0122445	0.887072	-0.0717825	0.404523	-0.0456613	0.596229	0.0171345	0.842473	0.0874021	0.309826	-0.000192986	0.998214	0.169031	0.0483176	-0.359939	1.55975e-05	-0.382628	3.94342e-06	-0.170436	0.0464573	-0.6383	4.8591e-17	0.0214497	0.803522	0.289799	0.00059266	0.262876	0.00191268	0.0192041	0.823739	0.119998	0.162498	0.181288	0.033999	0.218222	0.010414	0.477103	3.7628e-09	0.10214	0.234962	0.301599	0.000341564
MIDN	brown	-0.0158253	0.85437	-0.0947928	0.270532	-0.0112423	0.896261	0.0806306	0.348946	-0.00273953	0.974654	-0.0189526	0.82601	-0.0168456	0.845095	-0.128278	0.135207	-0.00937636	0.913405	0.501058	4.49062e-10	0.150962	0.0782585	0.532718	2.07544e-11	0.471269	6.16292e-09	-0.121849	0.156067	-0.250521	0.00315074	-0.148246	0.0838365	-0.247291	0.00357591	-0.357527	1.79442e-05	-0.423407	2.53589e-07	-0.489787	1.2461e-09	-0.351466	2.53939e-05	0.132378	0.123062
GADD45G	brown	-0.0246168	0.775234	-0.153132	0.0740198	0.0768981	0.371779	-0.00622005	0.942492	0.0439477	0.610102	-0.017643	0.837862	-0.125034	0.145449	0.00398245	0.963162	-0.303216	0.000316127	0.0519835	0.54632	0.243849	0.00408518	0.496595	6.75686e-10	0.164238	0.0551381	0.464897	1.04538e-08	0.373876	6.78528e-06	-0.228065	0.00735368	0.0372693	0.665466	-0.136456	0.111838	-0.102789	0.231986	-0.215821	0.0113122	-0.36908	9.07515e-06	-0.378532	5.09347e-06
AL109811.2	brown	0.0782292	0.363533	-0.215916	0.0112757	0.0461805	0.592054	-0.0293895	0.733166	-0.0561648	0.514476	-0.10172	0.236901	-0.0695915	0.419054	0.0376044	0.662641	-0.379791	4.70982e-06	-0.14944	0.0813465	0.237774	0.00514503	0.559621	1.17077e-12	0.523847	5.07219e-11	0.174949	0.0408779	0.180174	0.0351317	-0.124406	0.147499	0.423275	2.55998e-07	0.0133505	0.876948	-0.0585152	0.497005	-0.0895617	0.297977	-0.271424	0.00133534	-0.518723	8.39961e-11
COMMD4	brown	-0.039132	0.649825	0.0414578	0.630508	0.163341	0.0564993	0.0338338	0.69469	0.0421994	0.6244	-0.198973	0.0197566	-0.0397086	0.645013	-0.0753815	0.381313	0.366312	1.07114e-05	0.451162	3.14997e-08	0.358947	1.65253e-05	0.78489	7.54426e-30	0.143988	0.0932188	-0.026779	0.756086	-0.278919	0.000965107	0.00488752	0.954798	-0.173152	0.043028	-0.299699	0.000373857	-0.301457	0.000343882	-0.646252	1.48453e-17	-0.264271	0.00180517	-0.373597	6.90194e-06
TRMT2A	brown	-0.0142318	0.868896	-0.00936355	0.913523	0.200011	0.0191115	0.0459112	0.594217	-0.0526821	0.540932	-0.0648568	0.45147	0.0345521	0.688541	-0.0306689	0.722016	0.108945	0.205063	0.277067	0.00104661	0.292862	0.000514828	0.776295	7.74819e-29	0.521719	6.26051e-11	-0.0661553	0.442443	-0.224568	0.00833469	-0.123473	0.150581	0.0124979	0.884751	-0.168403	0.0491698	-0.305487	0.000283369	-0.474189	4.82001e-09	-0.234146	0.00588929	-0.388041	2.7967e-06
CSNK2B	brown	-0.018276	0.832129	-0.0496109	0.564808	0.186331	0.0292507	0.0620574	0.471277	-0.037989	0.659405	-0.163377	0.0564436	-0.0810044	0.346709	-0.114743	0.181831	0.263805	0.00184048	0.254494	0.00269042	0.410827	6.14817e-07	0.648105	1.12043e-17	0.315597	0.000172239	-0.080579	0.349255	-0.236463	0.00540349	-0.119353	0.164784	-0.0407111	0.636684	-0.209389	0.0140626	-0.236381	0.00542019	-0.443747	5.60129e-08	-0.172756	0.0435143	-0.415622	4.40548e-07
WASH9P	brown	-0.0320305	0.710215	-0.144813	0.0913389	0.100828	0.241061	0.0399258	0.643205	-0.0210164	0.807414	-0.010988	0.898595	-0.0354656	0.680749	-0.101886	0.236135	-0.0139383	0.871577	0.221799	0.00919208	0.325668	0.000103036	0.658535	2.2162e-18	0.604444	5.25033e-15	-0.119639	0.163768	-0.237303	0.00523658	-0.0964818	0.262049	0.0582114	0.499246	-0.219162	0.0100799	-0.161184	0.0598836	-0.407641	7.65098e-07	-0.239512	0.0048192	-0.235781	0.00554261
ANO6	brown	-0.00941769	0.913025	0.154845	0.0708055	-0.236996	0.00529701	-0.0190299	0.825312	0.016245	0.850552	0.0698079	0.417605	0.0834682	0.33219	0.181659	0.0336293	-0.0580423	0.500495	-0.299609	0.000375448	-0.404661	9.3674e-07	-0.787014	4.17256e-30	-0.34129	4.47794e-05	0.0427003	0.620289	0.1256	0.14362	0.0504496	0.558239	-0.0753244	0.381674	0.10637	0.216035	0.295187	0.000462153	0.570389	3.43994e-13	0.404465	9.49235e-07	0.358233	1.72251e-05
APP	brown	0.0722287	0.401601	0.0565138	0.511862	-0.203838	0.0168877	-0.0886046	0.303191	0.0252876	0.769278	0.00206012	0.980939	-0.154053	0.0722765	0.0492281	0.567818	-0.189164	0.0268392	-0.202415	0.0176868	-0.514307	1.28889e-10	-0.663907	9.37824e-19	-0.242397	0.00431886	0.0449509	0.601963	0.277064	0.00104674	-0.0616152	0.474449	-0.130633	0.128126	0.102914	0.231416	0.180481	0.0348163	0.529965	2.74615e-11	0.30042	0.000361278	0.371387	7.89495e-06
RER1	brown	0.0738659	0.390987	0.0554296	0.520006	0.00254541	0.97645	-0.0023527	0.978232	-0.00284717	0.973659	0.173052	0.0431505	0.0593019	0.491228	0.00120677	0.988834	0.196884	0.0211124	0.277773	0.00101484	-0.128989	0.13304	0.344918	3.6662e-05	0.00536773	0.950362	0.02531	0.76908	-0.205027	0.0162443	0.127878	0.136441	-0.213623	0.0121938	-0.243065	0.00421001	-0.117808	0.170359	-0.317943	0.000153055	-0.0493967	0.566492	-0.106182	0.216854
CIAO3	brown	0.0288525	0.737863	0.000461587	0.995729	0.162546	0.0577274	0.103565	0.22846	0.00219707	0.979672	-0.0618763	0.472574	-0.0204933	0.812117	-0.0521274	0.545208	0.197123	0.0209534	0.559296	1.21396e-12	0.205511	0.0159885	0.834308	1.00119e-36	0.339481	4.94294e-05	-0.0778945	0.365596	-0.386809	3.02576e-06	-0.024173	0.779181	-0.24604	0.00375405	-0.370887	8.13765e-06	-0.421041	3.00384e-07	-0.706205	5.48283e-22	-0.311742	0.000208689	-0.143193	0.0950597
TMCO6	brown	-0.0743922	0.387611	-0.0167397	0.846057	0.170286	0.0466524	0.196425	0.0214206	0.0762948	0.375554	-0.0412124	0.632535	-0.0389547	0.651307	-0.0703895	0.413726	0.182566	0.0327383	0.559614	1.17171e-12	0.288945	0.000616241	0.640835	3.34203e-17	0.554337	2.10163e-12	0.00531848	0.950817	-0.405267	8.99123e-07	-0.0543904	0.527872	-0.319173	0.000143815	-0.412119	5.62309e-07	-0.468451	7.79553e-09	-0.675654	1.34297e-19	-0.450321	3.36474e-08	0.0314656	0.715103
SKP1	brown	-0.0161853	0.851096	0.0967717	0.260611	-0.115632	0.178447	-0.00759595	0.929801	0.0736082	0.392646	0.0109047	0.899359	-0.0662966	0.441466	-0.110668	0.197944	-0.0379283	0.659915	-0.125126	0.14515	0.0560435	0.515387	-0.356681	1.8844e-05	-0.47742	3.66223e-09	0.0541038	0.530052	0.146313	0.0879976	0.0745639	0.386513	-0.0229632	0.78997	0.00632565	0.941518	0.141698	0.0986006	0.202924	0.0173974	0.0795435	0.355503	0.0627573	0.466281
TBC1D17	brown	0.0380202	0.659142	-0.181	0.0342896	0.185628	0.0298768	0.0487542	0.571556	0.0276549	0.748372	-0.0428457	0.619098	-0.0850634	0.323	-0.0362129	0.674402	-0.157607	0.0658625	0.210904	0.0133667	0.190968	0.025394	0.686731	1.97562e-20	0.506142	2.79906e-10	0.100801	0.241189	-0.0213572	0.804353	-0.124323	0.14777	0.0426907	0.620367	-0.118952	0.166216	-0.209006	0.014243	-0.346496	3.35812e-05	-0.25691	0.00244121	-0.336577	5.78525e-05
NFKBIE	brown	0.072001	0.403091	-0.0999872	0.245027	-0.0344097	0.689758	-0.0625737	0.467588	-0.00389054	0.964011	0.00671654	0.937911	-0.00490845	0.954604	0.0193446	0.82247	0.143934	0.0933447	0.181447	0.0338406	0.106454	0.215673	0.54867	3.89213e-12	0.137004	0.110391	-0.0172108	0.841781	-0.212344	0.0127337	0.203485	0.0170829	0.069082	0.422475	-0.0654369	0.447424	-0.0307177	0.721593	-0.424209	2.39374e-07	-0.251644	0.00301388	-0.211526	0.0130903
APMAP	brown	0.0521166	0.545292	-0.0281631	0.743906	-0.0655664	0.446524	0.0419606	0.626364	0.0839397	0.329456	0.0110203	0.898298	-0.0417151	0.628386	0.0945418	0.271808	-0.0829124	0.335431	-0.465942	9.59318e-09	-0.175707	0.0399989	-0.504251	3.34011e-10	-0.40888	7.02923e-07	0.0300955	0.727007	0.329103	8.61127e-05	0.110286	0.199507	0.219374	0.0100055	0.23699	0.00529817	0.392852	2.05009e-06	0.500321	4.80586e-10	0.291178	0.000556376	-0.0888797	0.301687
GNAI1	brown	-0.141156	0.0999078	0.079081	0.358316	-0.192562	0.0241731	-0.00687613	0.936439	0.0466308	0.588443	-0.0482985	0.575161	-0.0520915	0.545485	-0.0333109	0.699179	-0.216242	0.01115	-0.236434	0.00540936	-0.236071	0.00548319	-0.514909	1.21617e-10	-0.224565	0.00833561	0.050461	0.558149	0.375271	6.22951e-06	-0.156812	0.0672556	-0.028446	0.741425	0.0966445	0.261241	0.15678	0.0673134	0.467865	8.18389e-09	0.234555	0.00580082	0.15099	0.0782027
RPUSD3	brown	-0.0685638	0.425972	-0.00562768	0.947961	0.185142	0.0303161	0.0557012	0.51796	0.138235	0.107197	-0.0489886	0.569706	0.0493644	0.566746	-0.0564552	0.512301	0.349171	2.89087e-05	0.384811	3.43568e-06	0.430232	1.54469e-07	0.704288	7.90369e-22	0.144722	0.0915452	0.0135244	0.875359	-0.230038	0.00684642	-0.0206786	0.810451	-0.151182	0.0778204	-0.310509	0.000221777	-0.244986	0.00391024	-0.620178	6.39266e-16	-0.33283	7.07101e-05	-0.355781	1.98468e-05
CNOT6	brown	-0.0263309	0.760043	0.160119	0.061615	-0.163607	0.0560922	0.0194256	0.821739	0.0526077	0.541505	0.00969826	0.910445	-0.0786306	0.361069	0.0176772	0.837551	0.260406	0.00211743	0.0714956	0.406408	-0.317608	0.000155666	-0.594116	1.96648e-14	-0.190383	0.0258549	-0.110846	0.197221	-0.20817	0.0146449	0.17797	0.0374666	-0.285145	0.000731867	-0.0256583	0.765993	-0.0511836	0.552519	0.107718	0.210243	0.0732019	0.395271	0.606398	4.06777e-15
BANP	brown	-0.00643492	0.94051	-0.105992	0.217683	0.00857063	0.920821	0.163414	0.0563874	0.000688311	0.993631	-0.0484461	0.573992	-0.0492517	0.567633	0.0386787	0.653617	0.218866	0.010184	0.283207	0.000798224	0.140153	0.102365	0.485424	1.83162e-09	0.237437	0.00521033	-0.153424	0.0734642	-0.362855	1.31461e-05	-0.194185	0.0229819	-0.0908006	0.291317	-0.253433	0.00280696	-0.26069	0.00209291	-0.379354	4.83991e-06	-0.150215	0.0797619	-0.10124	0.239136
ENO3	brown	0.033858	0.694482	-0.176226	0.0394055	0.210397	0.0135961	0.0156664	0.855817	-0.104032	0.226361	-0.090341	0.293776	0.0486648	0.572263	0.00442972	0.959028	-0.0525064	0.542285	0.126769	0.139901	0.28313	0.00080099	0.607532	3.50513e-15	0.519324	7.9208e-11	-0.0970685	0.259145	-0.181403	0.0338847	0.0248263	0.773372	0.17772	0.03774	-0.0548562	0.524339	-0.1689	0.0484952	-0.382415	3.99658e-06	-0.28995	0.000588588	-0.220806	0.00951774
ARHGAP42	brown	-0.0468092	0.587016	0.231193	0.00656429	-0.207584	0.014932	0.0372677	0.665479	0.0192274	0.823528	0.0341506	0.691976	0.0214816	0.803237	0.0365155	0.671837	0.218142	0.0104429	0.103441	0.229021	-0.441242	6.78242e-08	-0.574254	2.19199e-13	-0.287581	0.000655653	-0.209581	0.0139727	-0.245131	0.00388829	0.149061	0.08213	-0.325792	0.000102375	-0.044339	0.606921	-0.0064805	0.940089	0.20091	0.0185673	0.311476	0.000211452	0.56393	7.20932e-13
SORL1	brown	0.0189039	0.82645	-0.00117831	0.989097	-0.16526	0.0536207	-0.06255	0.467758	-0.0346304	0.687872	0.148982	0.0822944	0.0142573	0.868663	0.0282059	0.743531	-0.303026	0.000319022	-0.218768	0.0102187	-0.296089	0.000443099	-0.59574	1.60278e-14	-0.195112	0.0223242	0.0374599	0.663858	0.243298	0.00417249	0.0403663	0.639543	0.0921321	0.28427	0.298408	0.000397375	0.173973	0.0420349	0.321075	0.000130533	0.00672606	0.937823	0.482235	2.41918e-09
AKAP9	brown	0.0268201	0.755724	0.125904	0.142647	-0.222009	0.00912432	0.0555117	0.519386	-0.00239566	0.977835	0.126088	0.142058	0.00861619	0.920402	0.130492	0.128541	-0.199592	0.0193698	-0.160775	0.0605448	-0.314222	0.000184501	-0.652728	5.5068e-18	0.00723926	0.93309	0.108915	0.205188	0.174542	0.0413572	-0.0469637	0.585781	-0.0766281	0.373466	0.112385	0.191033	0.0385145	0.654993	0.357513	1.79588e-05	0.0402861	0.640209	0.468636	7.67676e-09
SPPL2B	brown	-0.000939671	0.991305	-0.195661	0.0219423	0.135805	0.113574	0.0807812	0.348044	-0.0444364	0.606131	-0.0924942	0.282373	-0.0715728	0.405901	-0.0550408	0.522942	-0.0536419	0.533575	0.468908	7.50526e-09	0.222897	0.0088431	0.829435	5.95309e-36	0.704432	7.69028e-22	-0.0424188	0.622598	-0.273319	0.00123116	-0.175948	0.039723	-0.100685	0.241734	-0.339376	4.97113e-05	-0.443454	5.72845e-08	-0.603328	6.07006e-15	-0.418073	3.70782e-07	-0.077801	0.366174
MIR200A	brown	0.0829494	0.335215	-0.0199551	0.816964	0.021372	0.804221	0.115645	0.178397	0.055426	0.520033	-0.0146082	0.865461	-0.0258481	0.764313	-0.057337	0.505724	0.0726785	0.398668	0.619533	6.98518e-16	0.00251192	0.976759	0.55825	1.36401e-12	0.615614	1.19179e-15	0.00142061	0.986855	-0.272347	0.00128362	-0.0827986	0.336097	-0.429299	1.65401e-07	-0.444157	5.42736e-08	-0.45514	2.29995e-08	-0.598342	1.15219e-14	-0.412866	5.33927e-07	0.184873	0.0305617
MEGF9	brown	-0.013939	0.87157	0.0968274	0.260335	-0.120209	0.161752	-0.0793878	0.356449	-0.00156268	0.985541	0.0875843	0.308815	-0.00840233	0.922371	-0.00319507	0.970441	-0.23732	0.00523331	-0.390548	2.38028e-06	-0.418372	3.63035e-07	-0.795188	4.00456e-31	-0.480117	2.90542e-09	0.0284759	0.741162	0.317613	0.000155629	-0.0441121	0.608765	0.0702613	0.41458	0.285426	0.000722695	0.355371	2.03194e-05	0.616127	1.11172e-15	0.356336	1.9222e-05	0.341635	4.39407e-05
MSRB2	brown	0.0546525	0.525882	-0.155244	0.0700731	0.0363752	0.673026	0.056211	0.51413	-0.085331	0.321475	-0.0876384	0.308515	-0.0188327	0.827093	-0.175466	0.0402763	-0.023729	0.783136	0.224981	0.0082132	0.176567	0.0390206	0.525846	4.1564e-11	-0.0145961	0.865571	-0.0103541	0.904416	-0.0412246	0.632434	0.0363318	0.673393	-0.0631199	0.463704	-0.280194	0.000912432	-0.0500148	0.561639	-0.357265	1.8218e-05	-0.212434	0.012695	-0.219137	0.0100885
CTCF	brown	-0.0121091	0.888313	0.0676812	0.431966	-0.0770591	0.370776	0.0456348	0.596442	-0.0584764	0.497291	0.133225	0.120664	-0.0242512	0.778485	0.05023	0.559955	-0.147984	0.0843913	-0.269447	0.00145254	-0.129521	0.131432	-0.750863	4.33569e-26	-0.17891	0.0364558	0.0284043	0.74179	0.123192	0.15152	0.0118423	0.890758	0.0827955	0.336115	0.260493	0.00210986	0.101185	0.239392	0.377056	5.58106e-06	0.0341268	0.69218	0.490885	1.12993e-09
ERCC5	brown	-0.0111588	0.897028	-0.016254	0.850471	0.193106	0.0237679	0.115192	0.180114	-0.0983346	0.252954	-0.141223	0.0997451	-0.0694455	0.420032	-0.126235	0.141591	0.107072	0.213005	0.462679	1.25336e-08	0.388762	2.67039e-06	0.691698	8.13491e-21	0.467679	8.31111e-09	-0.0813285	0.344777	-0.236022	0.00549315	-0.0697821	0.417777	-0.115701	0.178187	-0.299614	0.000375349	-0.41216	5.60722e-07	-0.671994	2.48428e-19	-0.506685	2.66006e-10	-0.0835161	0.331912
REX1BD	brown	-0.041248	0.632241	-0.153162	0.0739614	0.118606	0.167463	0.0599494	0.4865	0.102178	0.234788	-0.0660284	0.44332	-0.0417285	0.628276	-0.0603188	0.483813	0.0809555	0.347001	0.331864	7.44322e-05	0.349005	2.91796e-05	0.899417	2.28357e-50	0.437799	8.8009e-08	-0.0106149	0.902021	-0.241635	0.00444633	-0.0943582	0.272745	0.0071888	0.933555	-0.254553	0.00268409	-0.280043	0.000918546	-0.566956	5.1078e-13	-0.315602	0.000172197	-0.385891	3.20795e-06
CENPB	brown	0.0862485	0.31628	-0.141415	0.0992823	0.151542	0.0771073	0.0494825	0.565817	0.028034	0.745039	-0.103995	0.226524	-0.162595	0.0576513	-0.0277914	0.747171	0.0340575	0.692773	0.178096	0.0373297	0.103886	0.227013	0.508293	2.28649e-10	0.0200031	0.816532	0.0243315	0.777771	-0.0143903	0.867449	-0.0880167	0.306423	-0.0433994	0.614571	-0.186791	0.028847	-0.153521	0.0732804	-0.23693	0.00531018	-0.0262618	0.760654	-0.317972	0.00015283
EGLN2	brown	0.000947271	0.991235	-0.196282	0.0215175	-0.0232781	0.787158	0.192651	0.0241062	-0.0271607	0.752721	-0.0967569	0.260684	0.0207835	0.809507	-0.0515367	0.549778	0.0644356	0.45442	0.211453	0.0131225	0.293113	0.000508884	0.751107	4.09572e-26	0.304764	0.000293447	-0.100307	0.243511	-0.177677	0.0377868	0.0345593	0.68848	0.125534	0.143832	-0.217317	0.0107451	-0.149797	0.0806131	-0.450551	3.30477e-08	-0.211937	0.0129101	-0.424448	2.35278e-07
ATP5PO	brown	0.031464	0.715117	-0.0377995	0.660999	0.207246	0.0151002	0.022849	0.790991	-0.00741818	0.93144	-0.144142	0.0928663	-0.0959074	0.264913	-0.087664	0.308373	-0.0042713	0.960492	0.11549	0.178985	0.611706	2.01558e-15	0.528859	3.07118e-11	0.0737261	0.391887	0.133261	0.120561	0.031366	0.715966	-0.139509	0.10397	0.11435	0.183339	-0.102562	0.233024	-0.184573	0.0308377	-0.333709	6.74714e-05	-0.317805	0.000154131	-0.420921	3.02959e-07
OBSL1	brown	-0.0270792	0.75344	-0.0964844	0.262036	0.0188153	0.827251	0.10382	0.227309	0.121474	0.157352	-0.0557732	0.517418	-0.0877103	0.308117	0.030843	0.720504	-0.0748237	0.384856	0.358439	1.70204e-05	0.0576545	0.503367	0.559102	1.2405e-12	0.380287	4.56646e-06	0.314308	0.000183716	-0.0063597	0.941204	-0.225218	0.0081439	-0.271633	0.00132349	-0.338977	5.08034e-05	-0.294739	0.000471912	-0.315703	0.00017133	-0.150914	0.0783548	-0.22353	0.00864725
TMEM80	brown	-0.0194979	0.821087	-0.0807232	0.348391	0.0467899	0.58717	0.0653848	0.447787	-0.0152138	0.859939	-0.00097647	0.990964	-0.0930223	0.279622	-0.041873	0.627085	-0.252235	0.00294407	0.130084	0.129749	0.0862333	0.316366	0.544852	5.85667e-12	0.367206	1.01543e-05	0.255952	0.00253745	0.0583368	0.49832	-0.103562	0.228473	0.0734769	0.393493	-0.217004	0.0108615	-0.230318	0.00677712	-0.248677	0.00338752	-0.302503	0.000327121	-0.255803	0.00255267
ATAD3B	brown	0.0238845	0.78175	-0.0821459	0.339933	0.188367	0.0274995	0.083994	0.329143	0.0336154	0.696563	0.0105056	0.903025	0.0628095	0.46591	0.0190234	0.825371	0.161141	0.0599534	0.431677	1.38875e-07	0.216125	0.0111949	0.779893	2.95986e-29	0.599483	9.95978e-15	-0.0988207	0.250604	-0.340259	4.73773e-05	-0.00358022	0.96688	-0.154079	0.0722277	-0.329947	8.23704e-05	-0.375171	6.26762e-06	-0.591704	2.65883e-14	-0.309773	0.000229949	-0.187428	0.0282961
CDC42	brown	0.0513809	0.550987	0.0163201	0.84987	-0.198272	0.0202031	-0.161631	0.0591695	-0.123329	0.151061	0.236268	0.00544313	0.0491787	0.568208	0.077727	0.366631	-0.106674	0.214719	-0.274477	0.0011712	-0.282702	0.000816409	-0.528254	3.26424e-11	-0.309817	0.000229458	-0.0704528	0.413306	0.0897652	0.296877	0.197101	0.0209681	0.12169	0.156612	0.114443	0.182983	0.230832	0.0066514	0.373332	7.01439e-06	0.219809	0.00985511	0.229943	0.00687022
USP34	brown	-0.00972384	0.910209	0.0920864	0.28451	-0.161713	0.0590389	-0.0605035	0.482473	-0.0427709	0.619711	0.0921419	0.284218	-0.00677119	0.937407	0.102564	0.233016	-0.121602	0.156914	-0.316166	0.000167397	-0.385145	3.36361e-06	-0.826874	1.48571e-35	-0.129862	0.130413	-0.0755889	0.380001	0.10827	0.207899	-0.00727543	0.932756	0.0235475	0.784754	0.262063	0.001978	0.162502	0.0577958	0.546239	5.05157e-12	0.297447	0.000415761	0.485254	1.85914e-09
AC005041.1	brown	0.0409045	0.635081	-0.0969206	0.259875	-0.0186663	0.828598	-0.0201341	0.815351	-0.00926778	0.914404	-0.132769	0.12195	-0.141588	0.0988631	-0.115983	0.177123	0.137961	0.107902	0.316874	0.00016154	0.107317	0.211951	0.596042	1.5428e-14	0.0585664	0.496628	-0.11853	0.167735	-0.143091	0.0952974	0.0154007	0.858236	-0.136499	0.111723	-0.266767	0.00162642	-0.210738	0.0134415	-0.378077	5.23926e-06	-0.0697939	0.417699	-0.31716	0.000159225
TMEM259	brown	-0.0362053	0.674465	-0.174268	0.0416823	0.1392	0.104744	0.0695488	0.41934	0.0555652	0.518983	-0.105594	0.219427	-0.0512445	0.552046	-0.0718328	0.404193	0.0636211	0.460155	0.373075	7.12522e-06	0.167144	0.0509146	0.812964	1.66173e-33	0.667099	5.57946e-19	-0.0977229	0.255932	-0.257298	0.00240313	-0.097666	0.25621	-0.0595124	0.489688	-0.295353	0.000458593	-0.334091	6.61111e-05	-0.523039	5.49503e-11	-0.289	0.000614676	-0.210921	0.0133594
SAFB2	brown	-0.0233608	0.786419	-0.209486	0.0140168	0.0395276	0.646522	0.0805862	0.349212	-0.0664315	0.440535	-0.0854037	0.321061	-0.0636487	0.45996	-0.00948457	0.91241	-0.306893	0.0002647	0.0894173	0.29876	0.272829	0.00125736	0.661853	1.3058e-18	0.647811	1.17182e-17	0.0878849	0.307151	0.0573213	0.505841	-0.219898	0.00982476	0.238613	0.00498531	-0.0692901	0.421076	-0.240667	0.00461295	-0.317882	0.000153533	-0.4752	4.42439e-09	-0.295822	0.000448652
CPD	brown	0.0398409	0.643911	0.172957	0.0432675	-0.186015	0.0295309	0.049034	0.569348	-0.00387334	0.96417	0.148093	0.0841611	0.115236	0.179947	0.0405283	0.638199	-0.0612661	0.476961	0.10621	0.216733	-0.314073	0.00018588	-0.529944	2.75214e-11	-0.204324	0.0166223	0.0601336	0.485159	0.00548446	0.949284	-0.000329607	0.99695	-0.315389	0.000174048	-0.0505726	0.557278	-0.068342	0.427474	0.125798	0.142987	-0.0193466	0.822452	0.59695	1.37528e-14
BAZ2B	brown	-0.0328121	0.703471	0.00971485	0.910292	-0.126003	0.142331	0.0664734	0.440247	0.00988618	0.908717	0.115465	0.179079	0.039248	0.648856	0.103193	0.230146	-0.0786275	0.361088	0.148133	0.0840768	-0.349179	2.88957e-05	-0.567538	4.77809e-13	0.0416961	0.628542	0.0211476	0.806236	-0.00411804	0.961908	0.0414898	0.630244	-0.383083	3.83188e-06	-0.132404	0.122989	-0.0601887	0.484759	0.117439	0.171709	-0.0297308	0.730186	0.708888	3.2701e-22
LRRC14	brown	-0.00510468	0.952791	-0.0335372	0.697235	0.167938	0.0498084	0.0624493	0.468476	0.0692301	0.421479	-0.085713	0.319305	-0.0549306	0.523775	-0.0500447	0.561406	0.251887	0.00298503	0.419572	3.33466e-07	0.22659	0.00775425	0.678722	7.96509e-20	0.492944	9.39698e-10	-0.134957	0.115868	-0.27884	0.00096847	-0.0295456	0.731803	-0.181791	0.0334981	-0.30608	0.000275348	-0.374924	6.36359e-06	-0.546897	4.7083e-12	-0.243817	0.00409021	-0.187847	0.0279379
CDC73	brown	-0.0302746	0.725447	0.139474	0.104057	-0.0595027	0.489759	-0.00793284	0.926696	-0.0714765	0.406535	0.0583309	0.498363	0.000297559	0.997247	0.0214952	0.803115	0.159751	0.0622229	0.0999722	0.245098	-0.277116	0.00104439	-0.653528	4.86322e-18	-0.18629	0.0292862	-0.111955	0.192748	-0.0590397	0.493149	0.0157607	0.854958	-0.370003	8.58431e-06	-0.0746778	0.385786	-0.112706	0.18976	0.141235	0.0997156	0.0534926	0.534716	0.620284	6.30014e-16
KIAA1109	brown	-0.0174349	0.839748	0.0688345	0.424143	-0.182593	0.0327122	-0.0873249	0.310255	0.00345482	0.96804	0.130133	0.129604	0.0175828	0.838407	0.118577	0.167567	-0.214671	0.0117663	-0.217835	0.0105545	-0.421664	2.87314e-07	-0.728321	6.44681e-24	0.0163854	0.849276	0.039892	0.643487	0.129433	0.131698	-0.0152859	0.859282	-0.0641754	0.456248	0.126046	0.142192	0.10982	0.201426	0.442749	6.04603e-08	0.164197	0.0552004	0.536773	1.36739e-11
AC022149.1	brown	-0.0626198	0.46726	0.135636	0.114027	-0.140492	0.10153	-0.0705641	0.412566	0.0225493	0.79367	0.121475	0.15735	0.0932296	0.278547	0.00756269	0.930108	0.214723	0.0117454	-0.145823	0.0890792	-0.348665	2.97426e-05	-0.638376	4.80466e-17	-0.491913	1.03075e-09	-0.128237	0.135332	-0.0741825	0.388954	0.132111	0.123828	-0.168482	0.0490612	0.067677	0.431995	0.206359	0.0155485	0.371079	8.04365e-06	0.450916	3.21135e-08	0.295464	0.000456232
FAM229A	brown	0.0182265	0.832576	-0.111527	0.194467	-0.032809	0.703497	0.104261	0.225331	-0.0638409	0.458603	-0.0590048	0.493405	-0.0373163	0.66507	-0.00787672	0.927213	-0.109669	0.202048	0.265753	0.00169699	0.128248	0.135301	0.727639	7.44147e-24	0.639066	4.34118e-17	-0.00136998	0.987324	-0.255108	0.00262505	-0.0360566	0.675727	0.0481421	0.576401	-0.226566	0.00776078	-0.273167	0.0012392	-0.435393	1.05405e-07	-0.330898	7.8339e-05	-0.235353	0.00563154
WDR45	brown	-0.0166749	0.846646	-0.0697691	0.417865	0.0493147	0.567137	0.0710808	0.409144	-0.0526177	0.541428	-0.0799432	0.353083	-0.0418783	0.627042	-0.15287	0.0745209	-0.0415867	0.629445	0.161317	0.0596709	0.220356	0.00966863	0.60325	6.13191e-15	0.193733	0.0233083	0.0310622	0.7186	-0.156951	0.0670108	0.0607135	0.480951	0.0525375	0.542046	-0.203915	0.0168455	-0.0995221	0.247241	-0.30262	0.000325289	-0.0637174	0.459475	-0.380144	4.60748e-06
NME2	brown	-0.0372946	0.665252	-0.0890092	0.30098	0.0790282	0.358638	0.00756116	0.930122	0.112307	0.191343	-0.056607	0.511165	-0.119996	0.162504	0.0281372	0.744133	0.151898	0.0764073	0.477775	3.5529e-09	0.167856	0.0499215	0.751919	3.38592e-26	0.382146	4.06453e-06	0.0209842	0.807703	-0.310527	0.000221584	-0.168802	0.0486277	-0.237722	0.00515502	-0.34457	3.73755e-05	-0.402999	1.04784e-06	-0.549419	3.5901e-12	-0.256833	0.00244878	-0.153434	0.0734439
TJAP1	brown	-0.0104126	0.903878	-0.199535	0.0194052	0.0973672	0.257675	0.0252198	0.76988	0.0218311	0.800102	-0.117869	0.170137	-0.0898146	0.296609	-0.0697675	0.417875	-0.0202104	0.814664	0.27661	0.00106769	0.232987	0.00614631	0.626764	2.55512e-16	0.651921	6.23932e-18	0.0432742	0.615593	-0.175456	0.0402885	-0.251165	0.00307153	-0.0373293	0.66496	-0.224826	0.0082584	-0.333021	6.99949e-05	-0.39404	1.89737e-06	-0.321315	0.000128946	-0.170809	0.0459725
ENKD1	brown	-0.0971461	0.258762	0.00348842	0.967729	0.108159	0.208368	0.105872	0.218207	0.164336	0.054991	-0.0517208	0.548352	-0.117793	0.170413	-0.0177416	0.836968	0.0985876	0.251729	0.488407	1.40843e-09	0.246401	0.00370181	0.786704	4.5513e-30	0.332567	7.17063e-05	0.330665	7.93105e-05	-0.137686	0.108614	-0.208951	0.0142695	-0.313204	0.000194093	-0.439173	7.93481e-08	-0.368077	9.63867e-06	-0.561153	9.86137e-13	-0.290339	0.000578197	-0.340278	4.7327e-05
ICE2	brown	-0.165345	0.0534959	0.158669	0.0640393	0.0458832	0.594443	-0.0016233	0.98498	-0.0326751	0.704651	-0.070343	0.414036	-0.0761606	0.376397	0.13457	0.116925	0.0860814	0.317222	-0.0784669	0.362073	-0.0953582	0.267672	-0.576908	1.6032e-13	-0.154191	0.0720195	-0.0148253	0.863481	0.0981098	0.254046	0.134021	0.118441	-0.133445	0.120046	0.0563332	0.513214	-0.034377	0.690038	0.171912	0.0445671	-0.0140664	0.870406	0.383694	3.68706e-06
PRMT7	brown	0.00139902	0.987055	-0.129139	0.132584	0.199322	0.0195378	0.116792	0.174099	0.0334336	0.698125	-0.112006	0.192546	-0.117561	0.171262	-0.200439	0.0188511	0.205471	0.0160095	0.555073	1.93843e-12	0.393876	1.91776e-06	0.768889	5.31701e-28	0.308385	0.000246136	-0.161941	0.0586777	-0.382762	3.91029e-06	-0.0715014	0.406371	-0.231212	0.00655968	-0.394374	1.85642e-06	-0.402763	1.0646e-06	-0.718803	4.59692e-23	-0.37125	7.96095e-06	-0.0849962	0.323384
CTXN1	brown	-0.0317535	0.71261	-0.0252078	0.769987	-0.0247556	0.774001	0.100908	0.240686	0.0751924	0.382512	-0.107218	0.212379	-0.119916	0.162785	-0.0615302	0.47506	0.261337	0.00203804	0.350414	2.69519e-05	0.146327	0.0879684	0.685088	2.63945e-20	0.15297	0.0743293	-0.0317828	0.712357	-0.300487	0.000360129	-0.0733384	0.394388	-0.170958	0.045781	-0.311583	0.000210333	-0.255104	0.00262538	-0.404141	9.70222e-07	-0.0083795	0.922581	-0.398534	1.4117e-06
MRPL38	brown	-0.0560676	0.515205	-0.186744	0.0288875	0.0499449	0.562187	0.0460684	0.592954	0.078851	0.359721	-0.0906636	0.292048	-0.049407	0.566411	-0.0314133	0.715556	0.177556	0.0379194	0.392392	2.1124e-06	0.230755	0.00666993	0.787499	3.641e-30	0.58654	5.02922e-14	-0.0647566	0.452171	-0.312141	0.000204611	-0.121658	0.156722	-0.0936739	0.276253	-0.276596	0.00106833	-0.385063	3.38121e-06	-0.57337	2.43128e-13	-0.354862	2.0923e-05	-0.247593	0.00353401
TMEM115	brown	0.0407831	0.636087	-0.166839	0.0513451	-0.00684821	0.936696	-0.0495478	0.565303	-0.0900309	0.295443	0.0380929	0.658532	0.0106953	0.901282	-0.0278511	0.746646	-0.227012	0.00763772	0.13314	0.120903	0.0178417	0.83606	0.520805	6.85017e-11	0.106547	0.215269	0.165477	0.0533027	0.0696339	0.418769	-0.219368	0.0100078	0.0229794	0.789825	-0.0718009	0.404403	-0.0414069	0.630928	-0.159558	0.062544	-0.0717226	0.404917	-0.340025	4.79848e-05
2020-09-10	brown	-0.0562497	0.51384	0.0894047	0.298829	-0.0831121	0.334264	0.0127233	0.882687	-0.00335177	0.968992	0.0733196	0.39451	0.0310921	0.718341	0.056642	0.510903	0.158492	0.0643405	0.0842701	0.327549	-0.35029	2.71417e-05	-0.605805	4.39631e-15	-0.120866	0.159456	-0.169661	0.0474755	-0.0829654	0.335121	-0.0312422	0.717039	-0.369672	8.75728e-06	-0.129007	0.132983	-0.0787123	0.360569	0.265993	0.00168008	0.253876	0.00275775	0.525553	4.27973e-11
SFI1	brown	0.0252944	0.769218	-0.107428	0.211479	0.0819176	0.341281	0.0228626	0.790869	-0.0946627	0.271193	-0.0783384	0.362862	0.00273635	0.974684	-0.107133	0.212744	0.0544947	0.52708	0.317254	0.000158472	0.265352	0.00172571	0.680733	5.636e-20	0.627089	2.44072e-16	-0.205844	0.0158147	-0.349801	2.79003e-05	-0.0953177	0.267876	0.0604091	0.483158	-0.181617	0.0336703	-0.391963	2.17208e-06	-0.528645	3.13829e-11	-0.389251	2.58784e-06	-0.0991808	0.248873
SNHG17	brown	0.0131847	0.878465	-0.0476339	0.580437	0.169547	0.0476271	0.105735	0.218808	-0.00268367	0.975171	-0.0964794	0.262061	0.00569856	0.947307	-0.0722346	0.401563	0.172713	0.0435675	0.415027	4.59295e-07	0.566338	5.48181e-13	0.666741	5.91554e-19	0.362639	1.33146e-05	-0.124188	0.148214	-0.296043	0.000444047	-0.190448	0.0258039	-0.118711	0.167083	-0.325881	0.000101903	-0.442243	6.28414e-08	-0.588721	3.84788e-14	-0.392451	2.10437e-06	-0.190587	0.0256932
PTOV1	brown	-0.0480295	0.577294	-0.156874	0.0671466	0.106214	0.216713	0.119687	0.163595	0.0275642	0.749169	-0.146936	0.0866401	-0.124872	0.145975	-0.0906926	0.291894	0.105886	0.218145	0.354891	2.08875e-05	0.379327	4.84792e-06	0.781606	1.85978e-29	0.475412	4.34556e-09	0.0157345	0.855197	-0.11042	0.198961	-0.141999	0.0978783	-0.0929799	0.279842	-0.298646	0.00039294	-0.338005	5.35552e-05	-0.485392	1.83688e-09	-0.244047	0.00405431	-0.455182	2.2924e-08
ATG4B	brown	-0.00828009	0.923497	-0.223702	0.00859489	0.0880201	0.306404	0.152645	0.0749542	0.0944111	0.272475	-0.107158	0.212637	-0.0559962	0.515741	-0.00235236	0.978235	0.112705	0.189764	0.495041	7.77922e-10	0.206122	0.0156704	0.835806	5.72106e-37	0.696137	3.62499e-21	-0.109592	0.202371	-0.313607	0.000190243	-0.0979046	0.255045	-0.17248	0.0438559	-0.385132	3.36645e-06	-0.412443	5.49826e-07	-0.639365	4.15372e-17	-0.37931	4.85301e-06	-0.152259	0.0757016
VAMP3	brown	0.0473816	0.582447	0.115711	0.178146	-0.0667681	0.438218	-0.0292432	0.734445	0.0959734	0.264583	0.258904	0.00225143	0.0847055	0.325048	0.0254021	0.768263	-0.0291733	0.735055	-0.173178	0.042997	-0.322673	0.000120272	-0.474916	4.53233e-09	-0.377843	5.31568e-06	-0.0991461	0.24904	0.152534	0.0751689	0.165476	0.0533042	-0.04873	0.571747	0.0568193	0.50958	0.279275	0.000950127	0.368258	9.53466e-06	0.328313	8.97595e-05	0.189481	0.0265803
ING5	brown	-0.0380054	0.659267	-0.20844	0.0145141	0.172798	0.0434635	0.162774	0.0573735	0.025953	0.763384	-0.0564125	0.51262	-0.07731	0.369216	0.022858	0.79091	-0.285637	0.000715857	0.0961956	0.263473	0.388702	2.68062e-06	0.487169	1.57109e-09	0.543624	6.67205e-12	0.222675	0.00891264	0.117866	0.170149	-0.386461	3.09372e-06	0.143741	0.0937878	-0.0602296	0.484462	-0.327305	9.46152e-05	-0.25948	0.00219914	-0.442299	6.25749e-08	-0.248096	0.00346541
ABCD4	brown	0.00948828	0.912376	-0.165823	0.0528002	0.124512	0.14715	0.158184	0.0648663	0.0236394	0.783935	0.0257157	0.765485	0.054241	0.529008	0.0933341	0.278007	0.0303185	0.725064	0.426237	2.06748e-07	0.260439	0.00211458	0.645658	1.62395e-17	0.625467	3.06592e-16	-0.0695764	0.419155	-0.321802	0.000125768	-0.150616	0.0789513	-0.138945	0.105389	-0.300727	0.000356038	-0.392828	2.05329e-06	-0.533546	1.90678e-11	-0.354432	2.14446e-05	-0.0442189	0.607897
ACLY	brown	0.00686841	0.93651	0.0246306	0.775111	-0.157862	0.0654215	-0.117756	0.170547	-0.00499819	0.953775	0.0149156	0.862657	-0.0943103	0.272989	0.0914119	0.288067	-0.262676	0.00192858	-0.397488	1.51287e-06	-0.252056	0.00296505	-0.705028	6.86642e-22	-0.182939	0.0323778	0.0438642	0.610782	0.536031	1.47653e-11	-0.0510475	0.553577	0.122936	0.152379	0.259467	0.00220032	0.225489	0.0080656	0.60051	8.73126e-15	0.218784	0.0102129	0.217937	0.0105173
RHOT2	brown	0.00863914	0.92019	-0.167982	0.0497476	0.151378	0.077431	0.119071	0.165792	0.0313775	0.715867	-0.065932	0.443988	-0.0364983	0.671982	-0.0227944	0.791478	0.0521526	0.545013	0.421812	2.84285e-07	0.137739	0.108475	0.839181	1.58766e-37	0.693366	6.01406e-21	-0.0956955	0.265975	-0.332526	7.1862e-05	-0.0443254	0.607032	-0.108656	0.206273	-0.301486	0.000343412	-0.361933	1.3879e-05	-0.566513	5.37278e-13	-0.280731	0.000891057	-0.175765	0.0399318
IFT27	brown	-0.0879523	0.306778	0.0278215	0.746907	0.109294	0.203607	-0.009947	0.908158	-0.0567715	0.509936	-0.127768	0.13678	-0.0498092	0.563251	-0.0144835	0.866599	0.143194	0.0950589	0.392271	2.12907e-06	0.263905	0.00183286	0.625271	3.15146e-16	0.313537	0.000190909	-0.0542521	0.528924	-0.196727	0.0212172	-0.183535	0.0318087	-0.210274	0.0136525	-0.358319	1.71397e-05	-0.322814	0.000119405	-0.486899	1.609e-09	-0.221435	0.00931025	-0.245935	0.00376924
ZNF213-AS1	brown	-0.060039	0.485847	0.0124662	0.885041	0.127259	0.138363	0.0697332	0.418105	-0.0192396	0.823418	-0.122053	0.15537	-0.0372737	0.665429	0.00702788	0.935039	-0.0548872	0.524104	0.340219	4.74799e-05	0.273054	0.00124527	0.682255	4.32952e-20	0.594243	1.93537e-14	0.0441765	0.608241	-0.119381	0.164685	-0.017453	0.839584	-0.0494063	0.566416	-0.268387	0.00151921	-0.367863	9.7629e-06	-0.518388	8.67955e-11	-0.419772	3.28768e-07	-0.189677	0.0264214
ACAP3	brown	-0.0183874	0.83112	-0.147847	0.0846833	0.115648	0.178384	0.0813534	0.344628	0.0422074	0.624334	-0.00775216	0.928361	-0.0264785	0.758739	-0.0185738	0.829434	0.0891533	0.300195	0.25808	0.00232821	-0.016617	0.847172	0.727457	7.73054e-24	0.516353	1.05781e-10	-0.101773	0.236658	-0.0905305	0.29276	-0.0736347	0.392475	-0.082229	0.339443	-0.282556	0.000821724	-0.191353	0.0250945	-0.322674	0.00012027	-0.0534469	0.535066	-0.391255	2.27404e-06
ARPC1B	brown	0.0718938	0.403793	-0.154149	0.0720982	-0.0786131	0.361177	0.0236988	0.783405	0.0791359	0.357982	-0.0757764	0.378816	-0.0222935	0.795959	-0.0302019	0.72608	0.150225	0.0797425	0.21484	0.0116985	-0.0832582	0.333412	0.563727	7.37698e-13	0.246586	0.00367532	-0.211368	0.0131599	-0.28057	0.000897413	0.100751	0.241423	0.00503725	0.953414	-0.141501	0.0990745	-0.00793775	0.926651	-0.33888	5.10711e-05	-0.0540397	0.53054	-0.170158	0.04682
MRPS11	brown	-0.0454225	0.598154	0.0854362	0.320876	0.124457	0.147332	0.0433263	0.615167	-0.0406136	0.637492	-0.237287	0.00523962	-0.111655	0.193952	-0.0224555	0.794509	0.277679	0.00101901	0.233361	0.00606238	0.270238	0.00140459	0.47292	5.36489e-09	-0.240382	0.00466309	0.124963	0.145681	-0.0522328	0.544394	-0.0199909	0.816642	-0.0788867	0.359502	-0.179775	0.035545	-0.164553	0.0546672	-0.413771	5.01346e-07	-0.212457	0.0126854	-0.330691	7.92028e-05
RP2	brown	-0.00723658	0.933114	0.0782419	0.363455	-0.185985	0.0295576	-0.115523	0.178857	-0.155265	0.0700354	0.12944	0.131678	0.0444692	0.605865	0.091685	0.286623	-0.0205004	0.812053	-0.13436	0.117503	-0.497079	6.4657e-10	-0.716387	7.47073e-23	-0.232291	0.00630552	-0.193694	0.0233369	-0.0321731	0.708983	0.2356	0.0055801	-0.0995307	0.2472	0.0733501	0.394313	0.206809	0.0153199	0.342071	4.29007e-05	0.238203	0.00506267	0.651583	6.57347e-18
NSUN5P1	brown	-0.032037	0.710158	-0.135647	0.113999	0.0950306	0.269327	0.210354	0.0136157	0.0397899	0.644336	-0.0759845	0.377505	0.0340268	0.693036	-0.0445294	0.605377	0.0667305	0.438477	0.38339	3.75853e-06	0.330833	7.86107e-05	0.800922	7.25343e-32	0.760035	4.84729e-27	-0.0864083	0.315381	-0.306303	0.000272384	-0.06735	0.434228	-0.0429068	0.618598	-0.318466	0.000149062	-0.407219	7.87441e-07	-0.594435	1.88912e-14	-0.41647	4.15116e-07	-0.217944	0.0105145
DPH7	brown	-0.00801722	0.925919	-0.162125	0.0583873	0.110483	0.198701	0.149823	0.0805597	0.0188758	0.826704	-0.0924805	0.282445	0.0460067	0.59345	-0.0457747	0.595316	0.103882	0.227034	0.283396	0.000791519	0.375109	6.29171e-06	0.760676	4.14439e-27	0.590532	3.07578e-14	-0.0275137	0.749613	-0.174595	0.0412943	-0.0930722	0.279363	0.0238484	0.782071	-0.268417	0.00151724	-0.319075	0.000144531	-0.514087	1.31636e-10	-0.356802	1.87128e-05	-0.39613	1.65456e-06
TSN	brown	-0.0120321	0.889018	0.0509926	0.554005	0.0339564	0.693639	-0.110739	0.197657	-0.00433054	0.959944	0.077422	0.36852	-0.0105788	0.902352	0.0904361	0.293266	0.0830496	0.334629	-0.0732361	0.39505	-0.06815	0.428777	-0.48663	1.6475e-09	-0.375404	6.17865e-06	-0.0810785	0.346266	0.124502	0.147184	0.0552943	0.521026	-0.107526	0.211058	0.0818336	0.341778	0.0519658	0.546456	0.223124	0.00877241	0.105908	0.218052	0.226125	0.00788444
SERF2	brown	0.0344779	0.689175	-0.0283407	0.742348	0.0596519	0.488669	-0.0133557	0.8769	-0.163238	0.0566572	-0.0836982	0.330855	-0.0256499	0.766067	-0.0663712	0.440952	-0.000228477	0.997886	0.238884	0.0049347	0.220543	0.00960576	0.564849	6.49501e-13	0.0801003	0.352135	0.0078565	0.9274	-0.118623	0.167402	-0.0572108	0.506662	-0.0293037	0.733916	-0.200087	0.0190651	-0.0874452	0.309587	-0.38324	3.79412e-06	-0.149872	0.0804609	-0.247803	0.00350529
NUDT22	brown	-0.0271101	0.753167	-0.110009	0.200645	0.153514	0.0732934	0.0419216	0.626686	0.0791092	0.358144	-0.0654388	0.447411	-0.0688254	0.424205	-0.0580739	0.500261	0.169035	0.0483127	0.451043	3.17961e-08	0.159103	0.0633063	0.860054	2.79033e-41	0.34398	3.86173e-05	0.0103473	0.904479	-0.288314	0.00063418	-0.0714332	0.40682	-0.139178	0.104799	-0.340263	4.73658e-05	-0.364351	1.20346e-05	-0.616134	1.11074e-15	-0.297706	0.000410723	-0.272831	0.00125723
YWHAZP4	brown	-0.0521974	0.544667	0.176045	0.0396123	0.019483	0.821221	-0.0223455	0.795494	-0.00416883	0.961439	0.0764232	0.374749	0.0199395	0.817105	0.0162156	0.85082	0.319478	0.000141602	0.0869501	0.312345	-0.287952	0.000644718	-0.611738	2.00703e-15	-0.37567	6.07846e-06	-0.139188	0.104776	-0.15746	0.0661188	0.0526424	0.541238	-0.331413	7.62333e-05	-0.0261672	0.76149	-0.0162092	0.850878	0.125229	0.144816	0.183848	0.0315127	0.561016	1.00139e-12
PTPN11	brown	0.0475758	0.580899	0.086713	0.313671	-0.112905	0.188976	-0.0680415	0.429513	-0.0401434	0.641395	0.035057	0.684231	-0.0258713	0.764107	0.0781429	0.364065	-0.0963984	0.262463	-0.278588	0.000979233	-0.268061	0.00154024	-0.761352	3.51072e-27	-0.165441	0.0533559	-0.00310835	0.971243	0.210366	0.0136106	-0.0433016	0.61537	-0.0299057	0.728661	0.130791	0.127659	0.117432	0.171737	0.494014	8.53498e-10	0.174178	0.0417896	0.418386	3.6268e-07
NDUFA11	brown	-0.0172664	0.841276	-0.132119	0.123805	0.169748	0.0473607	-0.0254777	0.767593	0.00581461	0.946235	-0.131422	0.125817	-0.052876	0.539442	-0.0933778	0.277781	0.131807	0.124701	0.397906	1.47164e-06	0.332459	7.21187e-05	0.905571	3.978e-52	0.317562	0.000156029	-0.0170975	0.842809	-0.248964	0.00334966	-0.0917565	0.286246	-0.0797605	0.354189	-0.347611	3.15548e-05	-0.28854	0.000627691	-0.582647	8.07295e-14	-0.260642	0.00209702	-0.405587	8.79848e-07
RPS19BP1	brown	0.00563147	0.947926	0.00500691	0.953695	0.151601	0.0769901	0.00513852	0.952479	-0.0762002	0.376148	-0.129057	0.132833	-0.0998272	0.245787	-0.0172429	0.841489	0.0965182	0.261868	0.139709	0.103468	0.397743	1.48762e-06	0.697169	2.99794e-21	0.0451604	0.60027	0.203934	0.0168349	-0.0534959	0.534691	-0.194104	0.0230398	0.0936017	0.276625	-0.103878	0.22705	-0.173416	0.0427072	-0.394222	1.87495e-06	-0.230576	0.00671373	-0.567826	4.62245e-13
MAMDC4	brown	0.0251471	0.770525	-0.0471508	0.584287	0.0690998	0.422355	0.0371666	0.666333	0.0595559	0.48937	0.0277661	0.747394	0.132924	0.121511	0.068472	0.426593	0.073843	0.391134	0.408012	7.45944e-07	-0.0551734	0.521939	0.549461	3.57355e-12	0.499466	5.1986e-10	-0.0402906	0.640172	-0.233637	0.00600083	-0.121657	0.156723	-0.254949	0.00264179	-0.226615	0.00774721	-0.279424	0.00094393	-0.423919	2.44425e-07	-0.185991	0.0295522	-0.0583182	0.498457
PHKG2	brown	0.00617289	0.942928	-0.0564196	0.512567	0.0939602	0.274781	0.15418	0.0720402	0.0457313	0.595665	-0.120242	0.161639	-0.011175	0.896878	-0.0793666	0.356578	0.336749	5.73167e-05	0.592929	2.28181e-14	0.279016	0.000961013	0.85405	3.84769e-40	0.505314	3.0248e-10	-0.210168	0.0137011	-0.454781	2.36657e-08	0.0177979	0.836458	-0.261002	0.00206632	-0.434329	1.14106e-07	-0.42811	1.80414e-07	-0.753311	2.439e-26	-0.334339	6.52402e-05	-0.173222	0.0429435
LTO1	brown	0.00905255	0.916385	0.0558146	0.517106	0.134946	0.115897	0.128321	0.135077	-0.0301737	0.726326	-0.159733	0.0622535	-0.0904813	0.293024	-0.0556495	0.518349	0.20327	0.0172028	0.495697	7.33027e-10	0.291482	0.000548662	0.657354	2.67134e-18	0.612115	1.90843e-15	-0.00680161	0.937126	-0.293178	0.000507361	-0.104858	0.222675	-0.208898	0.0142945	-0.397879	1.4743e-06	-0.484062	2.06358e-09	-0.628291	2.05903e-16	-0.453097	2.70448e-08	-0.0535312	0.534421
DICER1-AS1	brown	-0.096022	0.26434	-0.00297835	0.972445	0.0708795	0.410475	0.18045	0.0348481	0.146538	0.0875058	-0.0754445	0.380914	-0.0308661	0.720303	-0.0258657	0.764157	0.0513998	0.55084	0.37028	8.44215e-06	0.313794	0.00018848	0.653217	5.10404e-18	0.491123	1.10621e-09	0.0834457	0.332321	-0.0298706	0.728967	-0.0605202	0.482352	-0.130134	0.129602	-0.3573	1.81812e-05	-0.359342	1.615e-05	-0.541546	8.30815e-12	-0.451322	3.11062e-08	-0.265105	0.00174357
PIK3C3	brown	-0.0387944	0.652648	0.0952269	0.268334	-0.0565465	0.511618	-0.247595	0.00353373	-0.0834211	0.332464	0.0558102	0.517139	0.0436879	0.612217	0.0571216	0.507327	-0.257075	0.00242494	-0.546656	4.83148e-12	-0.140742	0.100918	-0.622377	4.71787e-16	-0.410123	6.45378e-07	0.144289	0.09253	0.294113	0.000485837	0.0422735	0.623791	0.281256	0.000870574	0.281149	0.000874706	0.389481	2.54973e-06	0.609119	2.8427e-15	0.313409	0.000192125	0.00221688	0.979488
FAM160B2	brown	0.0135852	0.874802	-0.212813	0.0125333	0.071615	0.405623	0.0648465	0.451542	0.0309623	0.719468	-0.0361245	0.675151	0.0391723	0.649488	-0.0504308	0.558386	-0.0344881	0.689088	0.327987	9.13021e-05	0.0588038	0.494882	0.65868	2.16606e-18	0.664916	7.96469e-19	-0.117883	0.170085	-0.24488	0.00392621	-0.176212	0.0394216	-0.0719292	0.403561	-0.269167	0.00146991	-0.27366	0.00121321	-0.375668	6.07937e-06	-0.194453	0.0227897	-0.142992	0.0955296
YWHAB	brown	0.0719959	0.403124	0.00338168	0.968716	-0.0267884	0.756003	0.0361496	0.674938	-0.0219308	0.799208	0.00158604	0.985325	-0.0168467	0.845085	0.0112913	0.895811	0.142502	0.0966827	-0.102521	0.23321	-0.224406	0.00838285	-0.588849	3.78755e-14	-0.195242	0.022233	-0.26764	0.00156778	0.0172537	0.841391	0.173696	0.0423677	-0.0455319	0.597272	0.0827193	0.336562	0.0828659	0.335703	0.217013	0.0108581	0.0717467	0.404758	0.457958	1.83621e-08
FAN1	brown	-0.0264257	0.759205	0.0963654	0.262627	0.0379698	0.659567	0.00681564	0.936997	0.0387309	0.65318	0.138636	0.106172	0.0274026	0.750591	0.1532	0.0738892	-0.0604916	0.48256	0.0133853	0.87663	-0.24848	0.00341373	-0.557667	1.45526e-12	-0.0424975	0.621952	0.0604528	0.482841	0.101609	0.237418	0.0331828	0.70028	-0.252003	0.00297132	0.0211603	0.806121	-0.0301968	0.726124	0.186383	0.0292046	0.0265915	0.757741	0.556597	1.6385e-12
SNORD60	brown	-0.0495943	0.564938	-0.0302426	0.725725	0.113174	0.187916	0.168306	0.0493019	0.123678	0.149901	-0.207457	0.0149952	-0.136045	0.11293	-0.127596	0.137313	0.197014	0.0210256	0.438179	8.5523e-08	0.477094	3.76561e-09	0.709765	2.75801e-22	0.547277	4.52038e-12	-0.0919767	0.285086	-0.306172	0.000274129	-0.129808	0.130573	-0.1633	0.0565614	-0.353534	2.25742e-05	-0.403042	1.04484e-06	-0.619966	6.58138e-16	-0.371787	7.70562e-06	-0.198107	0.020309
EIF4E	brown	-0.0169868	0.843814	0.197056	0.0209977	-0.103065	0.230727	-0.116095	0.176701	-0.0137077	0.873683	0.0616433	0.474247	0.0214232	0.803761	0.00825749	0.923705	0.40504	9.13021e-07	0.099264	0.248474	-0.167082	0.0510021	-0.495418	7.51802e-10	-0.485882	1.75951e-09	-0.167509	0.050404	-0.104438	0.224542	0.0782697	0.363284	-0.334684	6.40457e-05	-0.148224	0.0838848	-0.0425399	0.621605	0.0387985	0.652614	0.122806	0.152817	0.384785	3.44137e-06
CCDC84	brown	0.0121227	0.888188	-0.129827	0.130516	0.0521716	0.544867	0.0856696	0.319551	0.0113027	0.895706	-0.127471	0.137701	-0.0328568	0.703086	-0.0306419	0.722251	0.0801444	0.351869	0.328826	8.73754e-05	0.293961	0.00048928	0.767774	7.06098e-28	0.725401	1.18818e-23	-0.125138	0.145112	-0.260131	0.0021414	-0.0822704	0.339199	0.00154587	0.985696	-0.301435	0.00034424	-0.399966	1.28365e-06	-0.516514	1.0414e-10	-0.344853	3.67953e-05	-0.285639	0.000715779
ISYNA1	brown	-0.146961	0.0865859	-0.0644573	0.454268	-0.00161205	0.985084	0.0510888	0.553256	0.113594	0.186273	-0.0148924	0.862869	-0.0277092	0.747894	0.0980211	0.254477	-0.0573998	0.505257	0.159695	0.062316	0.167337	0.0506432	0.559634	1.16899e-12	0.278791	0.000970541	0.461653	1.36249e-08	0.146308	0.0880093	-0.158261	0.0647358	-0.044602	0.604788	-0.222625	0.00892833	-0.200709	0.0186877	-0.264002	0.00182551	-0.238794	0.00495141	-0.455485	2.23769e-08
RPAP2	brown	-0.126545	0.140608	0.233784	0.00596855	-0.0825087	0.337797	-0.0595267	0.489583	0.0247347	0.774187	0.0844973	0.326243	-0.0328634	0.703029	-0.0132796	0.877597	0.0987551	0.25092	-0.259022	0.00224063	-0.0898825	0.296243	-0.525214	4.42697e-11	-0.278987	0.000962235	0.0415378	0.629848	0.101992	0.235646	0.148826	0.0826207	0.0220503	0.798138	0.0727923	0.397928	0.153009	0.0742538	0.337363	5.5449e-05	0.191489	0.0249888	0.0746147	0.386189
RAB7A	brown	-0.00357932	0.966888	0.143205	0.0950312	-0.130119	0.129645	0.011944	0.889826	0.0655793	0.446434	0.106617	0.214965	-0.00972429	0.910205	0.0559146	0.516354	0.171528	0.0450516	-0.170092	0.0469071	-0.413797	5.00442e-07	-0.524153	4.92004e-11	-0.121086	0.158692	-0.310216	0.000224997	0.0243632	0.777489	0.109711	0.201875	-0.0769307	0.371576	0.0359914	0.67628	0.231601	0.00646697	0.383315	3.77624e-06	0.372735	7.27434e-06	0.214377	0.0118849
DGKZ	brown	0.0532531	0.536549	-0.200287	0.018943	0.135256	0.115054	0.0677727	0.431343	0.0482907	0.575223	-0.087089	0.311569	-0.00468805	0.956641	-0.0768478	0.372093	0.0796015	0.355151	0.20198	0.0179379	0.208462	0.0145033	0.74854	7.43958e-26	0.426877	1.97359e-07	-0.074779	0.385141	-0.145067	0.0907671	-0.073076	0.396087	0.108336	0.20762	-0.140625	0.101204	-0.225059	0.00819037	-0.450097	3.42445e-08	-0.280561	0.00089777	-0.358636	1.68268e-05
DYNLT3	brown	0.0361729	0.674741	0.0421254	0.625009	-0.249177	0.00332178	-0.111728	0.193657	-0.0825893	0.337324	0.0850559	0.323043	0.0296489	0.730901	-0.0412968	0.631837	0.145743	0.0892554	0.0751221	0.382958	-0.427583	1.87484e-07	-0.438643	8.2587e-08	-0.324879	0.00010734	-0.23965	0.00479404	-0.06821	0.42837	0.224433	0.00837491	-0.288629	0.000625159	-0.138927	0.105435	0.0600448	0.485805	0.194043	0.0230835	0.353316	2.28577e-05	0.380766	4.43178e-06
GALK1	brown	-0.0459233	0.594121	-0.086709	0.313693	0.105194	0.221185	0.00947462	0.912501	0.11549	0.178983	-0.0358548	0.677441	0.0113965	0.894846	-0.0392852	0.648545	0.191471	0.0250031	0.177225	0.0382856	0.253862	0.00275938	0.702228	1.16711e-21	0.0720862	0.402533	0.161933	0.0586905	-0.21288	0.0125052	-0.0758271	0.378496	-0.0152657	0.859466	-0.140964	0.100375	-0.0953141	0.267894	-0.392235	2.13401e-06	-0.0674906	0.433267	-0.507188	2.53734e-10
TRIOBP	brown	0.080606	0.349094	0.0184396	0.830648	0.0447807	0.60334	0.0303963	0.724387	-0.187547	0.0281937	-0.0668954	0.437344	-0.00768569	0.928974	-0.105937	0.217924	0.158069	0.0650642	0.56517	6.26234e-13	0.136551	0.111585	0.634061	9.01495e-17	0.186541	0.0290651	-0.0513638	0.55112	-0.316902	0.000161307	-0.161302	0.0596954	-0.311578	0.000210386	-0.40853	7.19975e-07	-0.398182	1.44503e-06	-0.556082	1.73428e-12	-0.281954	0.00084401	-0.0787519	0.360327
TAF6L	brown	-0.0108931	0.899466	-0.160448	0.0610762	0.189718	0.0263877	0.0393499	0.648005	0.0237621	0.782841	-0.138567	0.106348	-0.107305	0.212003	-0.135851	0.113452	-0.0590627	0.492981	0.111889	0.193011	0.211165	0.01325	0.710654	2.31953e-22	0.238107	0.0050811	0.214346	0.0118973	-0.0151532	0.860491	-0.0886895	0.302726	0.104117	0.225976	-0.101815	0.236464	-0.14149	0.0991009	-0.31749	0.0001566	-0.20824	0.0146106	-0.501816	4.18689e-10
CAMSAP2	brown	0.00385872	0.964305	0.137711	0.108547	-0.148108	0.0841301	0.041719	0.628354	0.0228682	0.790819	0.0348316	0.686154	-0.057299	0.506006	0.00481208	0.955495	-0.0151397	0.860614	-0.12108	0.158715	-0.361057	1.46109e-05	-0.699765	1.85224e-21	-0.220244	0.00970663	-0.124021	0.148763	0.11385	0.185278	-0.0662209	0.441989	-0.240504	0.00464166	-0.00737178	0.931868	0.073208	0.395232	0.487312	1.55141e-09	0.424664	2.31652e-07	0.353171	2.30476e-05
WASH2P	brown	0.0572348	0.506484	-0.147245	0.0859716	0.0477194	0.579757	0.156185	0.0683718	-0.076322	0.375383	-0.0683234	0.4276	0.0252694	0.76944	-0.0382008	0.657626	0.0208649	0.808775	0.384782	3.44199e-06	0.168764	0.0486785	0.754755	1.73134e-26	0.550038	3.35759e-12	-0.0654317	0.44746	-0.292082	0.000533711	-0.0261953	0.761241	-0.0897257	0.29709	-0.288246	0.000636139	-0.316932	0.000161063	-0.506565	2.6903e-10	-0.225589	0.00803695	-0.229321	0.00702714
MTPN	brown	-0.0175261	0.838921	0.108391	0.207387	-0.130692	0.127951	-0.0351022	0.683845	-0.0272701	0.751758	0.0725102	0.399764	0.0401293	0.641513	0.0439659	0.609954	0.0575376	0.504234	-0.309011	0.000238709	-0.342134	4.27531e-05	-0.76962	4.40986e-28	-0.249225	0.00331552	-0.294885	0.000468707	0.0555823	0.518855	0.0590877	0.492797	0.0711326	0.408802	0.235282	0.00564638	0.208813	0.0143351	0.508457	2.25122e-10	0.361364	1.43503e-05	0.403374	1.02176e-06
RABL6	brown	0.024947	0.772301	-0.16493	0.0541075	0.138673	0.106079	0.0438745	0.610698	0.152764	0.0747243	-0.1132	0.187816	-0.0826931	0.336715	-0.120126	0.162047	0.190188	0.0260106	0.44968	3.53792e-08	0.134449	0.117259	0.764472	1.62096e-27	0.25429	0.00271253	0.0603583	0.483526	-0.128908	0.133285	-0.225916	0.0079436	-0.207147	0.0151496	-0.273808	0.00120549	-0.357629	1.78383e-05	-0.545209	5.63839e-12	-0.237109	0.00527482	-0.291337	0.000552327
TXNRD2	brown	-0.0484895	0.573649	-0.0270139	0.754015	0.205029	0.016243	0.0443581	0.606767	0.00565095	0.947746	-0.0884258	0.304171	0.000671489	0.993786	-0.0765751	0.373798	0.223803	0.00856402	0.425344	2.20549e-07	0.296391	0.000436877	0.727408	7.81022e-24	0.125299	0.144591	0.121963	0.155675	-0.15536	0.0698628	-0.138927	0.105433	-0.18536	0.030118	-0.321669	0.000126626	-0.307963	0.000251263	-0.603673	5.80454e-15	-0.357982	1.74771e-05	-0.288829	0.000619507
ANXA7	brown	0.0363431	0.673297	0.0701413	0.415379	-0.0838524	0.329962	-0.0953029	0.26795	-0.0858454	0.318556	0.0311458	0.717875	-0.0234228	0.785867	0.0384152	0.655826	-0.11542	0.179248	-0.276233	0.00108535	-0.271428	0.0013351	-0.62607	2.81721e-16	-0.19217	0.0244685	-0.0824952	0.337877	0.337612	5.47053e-05	0.139031	0.105171	0.0531724	0.537168	0.119018	0.165981	0.168788	0.0486458	0.393828	1.92381e-06	0.0989074	0.250187	0.318173	0.000151285
MDFI	brown	-0.065925	0.444036	-0.0683625	0.427335	0.0518622	0.547257	0.0826658	0.336875	0.0390392	0.650601	-0.0737673	0.391622	-0.116807	0.174046	-0.159107	0.0632999	0.380388	4.53782e-06	0.418827	3.5155e-07	0.0711843	0.408461	0.563756	7.35279e-13	0.154694	0.0710841	-0.221135	0.00940875	-0.376925	5.62628e-06	-0.0832522	0.333447	-0.277551	0.00102475	-0.344157	3.82398e-05	-0.299945	0.000369509	-0.37667	5.71553e-06	0.106855	0.213937	-0.227855	0.0074094
RNY3P16	brown	0.111562	0.194326	-0.0191439	0.824283	0.000280627	0.997403	0.161417	0.0595105	0.121494	0.157284	-0.158946	0.06357	-0.131979	0.124206	-0.186555	0.0290537	0.138434	0.106688	0.34515	3.61931e-05	0.170574	0.0462781	0.590812	2.97071e-14	0.3134	0.000192209	-0.0915103	0.287546	-0.279038	0.000960103	-0.0822196	0.339498	-0.147826	0.0847268	-0.301096	0.000349853	-0.24226	0.0043416	-0.430446	1.52057e-07	-0.151887	0.0764282	-0.209241	0.0141319
ATP5F1D	brown	-0.020841	0.808991	-0.106952	0.21352	0.238304	0.00504355	0.0591333	0.492463	-0.00111005	0.989728	-0.136011	0.113023	-0.10178	0.236624	-0.101817	0.236456	0.102107	0.235112	0.41002	6.49961e-07	0.485868	1.76175e-09	0.904091	1.07995e-51	0.351719	2.50322e-05	0.111167	0.19592	-0.167933	0.0498153	-0.19322	0.0236838	-0.0775549	0.367696	-0.303796	0.000307454	-0.371091	8.03778e-06	-0.638258	4.88896e-17	-0.412811	5.35947e-07	-0.386664	3.05393e-06
IMPAD1	brown	-0.0500341	0.561489	0.152627	0.0749887	-0.060356	0.483543	-0.0937461	0.275881	-0.011523	0.893685	-0.0294266	0.732842	-0.0970229	0.25937	-0.0165436	0.847838	0.0872267	0.310802	-0.212049	0.0128616	-0.297221	0.000420204	-0.752979	2.63817e-26	-0.349568	2.82703e-05	-0.0741659	0.38906	0.137821	0.108265	-0.0338681	0.694396	-0.162135	0.0583709	0.0389468	0.651373	0.130921	0.127279	0.506518	2.70213e-10	0.43309	1.25104e-07	0.31848	0.000148953
MIR25	brown	0.0330047	0.701813	-0.0970399	0.259286	-0.00657067	0.939257	0.105404	0.22026	0.0971142	0.25892	-0.123734	0.149713	-0.0527309	0.540558	0.00536807	0.950359	0.106889	0.213792	0.336682	5.75242e-05	0.300135	0.000366199	0.669597	3.69896e-19	0.615924	1.14282e-15	-0.0625514	0.467747	-0.246586	0.00367529	-0.151969	0.0762669	-0.0279714	0.74559	-0.293658	0.000496213	-0.3683	9.51046e-06	-0.510343	1.88299e-10	-0.35517	2.05557e-05	-0.221763	0.00920351
AC005288.1	brown	0.0075755	0.92999	0.151578	0.0770357	-0.0946971	0.271018	-0.117968	0.169777	-0.0197542	0.818775	0.084769	0.324684	-0.0541175	0.529947	0.102312	0.234173	-0.00266287	0.975363	-0.206063	0.0157009	-0.244197	0.00403084	-0.660021	1.75008e-18	-0.162929	0.0571327	-0.178017	0.0374158	0.0654596	0.447266	-0.000402428	0.996276	0.00645298	0.940343	0.209852	0.0138467	0.0672191	0.435124	0.408979	6.98144e-07	0.227931	0.0073892	0.40657	8.22981e-07
WDFY1	brown	-0.0365497	0.671547	0.113072	0.188317	-0.061543	0.474967	0.046613	0.588586	0.067453	0.433524	0.0710697	0.409218	0.0455186	0.597379	0.108369	0.20748	0.298895	0.000388345	-0.0817937	0.342015	-0.391072	2.30107e-06	-0.705251	6.5805e-22	-0.27831	0.000991274	-0.298846	0.000389244	-0.154585	0.0712869	0.227013	0.00763729	-0.244761	0.00394425	0.070512	0.412912	0.162882	0.0572048	0.328918	8.69519e-05	0.44251	6.15753e-08	0.463815	1.14229e-08
DST	brown	-0.020128	0.815407	0.0716315	0.405515	-0.28942	0.000603019	-0.0640937	0.456822	0.027006	0.754085	0.0570063	0.508185	-0.0629895	0.46463	0.0232537	0.787375	-0.0867272	0.313591	-0.120407	0.16106	-0.493265	9.1299e-10	-0.636707	6.13606e-17	-0.101684	0.237068	0.0110244	0.898261	0.153939	0.0724916	-0.0852626	0.321864	-0.214402	0.0118746	0.00389482	0.963972	0.085924	0.318111	0.463424	1.17944e-08	0.286516	0.000688038	0.398936	1.37457e-06
FAHD2A	brown	-0.048055	0.577092	0.00940042	0.913184	0.233186	0.00610161	0.0737104	0.391988	0.114994	0.180868	-0.0242695	0.778322	0.0436452	0.612566	0.0129306	0.88079	0.177131	0.0383892	0.2935	0.000499854	0.319994	0.000137933	0.656392	3.10803e-18	0.189171	0.0268332	0.156248	0.0682585	-0.251065	0.00308374	-0.0789933	0.358851	-0.131827	0.124646	-0.304347	0.000299406	-0.206152	0.0156553	-0.413042	5.27415e-07	-0.0964922	0.261997	-0.419042	3.46229e-07
ABHD17A	brown	-0.00785861	0.92738	-0.268894	0.00148697	0.126477	0.140824	0.04078	0.636112	0.0014374	0.9867	-0.0959415	0.264743	-0.0410351	0.634001	-0.0890157	0.300944	-0.0391977	0.649276	0.285858	0.000708745	0.304376	0.000298992	0.875844	1.49995e-44	0.567194	4.9699e-13	-0.0897891	0.296747	-0.234537	0.00580459	-0.17446	0.0414539	0.0854917	0.320561	-0.218856	0.0101876	-0.284239	0.00076224	-0.498218	5.82788e-10	-0.300022	0.000368164	-0.329549	8.41181e-05
CDC5L	brown	-0.0900284	0.295457	0.135359	0.114775	0.0365168	0.671826	-0.0844202	0.326685	-0.00697689	0.935509	0.0981829	0.25369	-0.101815	0.236462	0.0644069	0.454621	-0.0387093	0.653361	-0.343135	4.04611e-05	-0.124477	0.147267	-0.726645	9.16605e-24	-0.380945	4.3825e-06	0.0755318	0.380361	0.231814	0.00641678	-0.0416353	0.629044	0.0374802	0.663687	0.231087	0.00658967	0.178623	0.0367618	0.498142	5.86812e-10	0.24892	0.00335536	0.235529	0.00559484
INO80B	brown	-0.034364	0.690149	-0.0685871	0.425815	0.117753	0.17056	0.168041	0.049666	0.0896194	0.297665	-0.0192604	0.823231	0.05667	0.510694	-0.0678523	0.430801	0.235909	0.00551626	0.521188	6.59667e-11	0.42911	1.67711e-07	0.8538	4.28146e-40	0.489449	1.28403e-09	-0.0637652	0.459138	-0.376591	5.74351e-06	-0.0463308	0.590848	-0.191249	0.025175	-0.425675	2.15334e-07	-0.458911	1.70083e-08	-0.708021	3.86662e-22	-0.384534	3.49653e-06	-0.273446	0.00122443
GPX1	brown	0.00554582	0.948717	-0.0762317	0.37595	0.059242	0.491667	0.0183557	0.831407	0.120908	0.15931	-0.0161948	0.85101	0.0190329	0.825285	0.0123487	0.886117	0.179104	0.0362501	0.242103	0.00436776	-0.000858657	0.992055	0.579854	1.12918e-13	0.243149	0.00419639	-0.13885	0.105629	-0.32304	0.000118026	0.0513065	0.551565	-0.0917921	0.286058	-0.235107	0.00568319	0.025711	0.765526	-0.345836	3.48405e-05	-0.0138729	0.872173	-0.272914	0.00125276
COPS9	brown	-0.026657	0.757163	-0.112589	0.190224	0.145514	0.0897657	-0.00013101	0.998788	0.0315068	0.714746	-0.0739829	0.390235	-0.114618	0.18231	-0.06737	0.434091	0.0543922	0.527858	0.133037	0.121192	0.505873	2.87044e-10	0.671211	2.83048e-19	-0.069207	0.421634	0.22563	0.00802524	0.0259211	0.763666	-0.179105	0.0362489	0.0882133	0.30534	-0.16309	0.0568846	-0.133293	0.120473	-0.383693	3.68743e-06	-0.240452	0.0046507	-0.559487	1.18841e-12
SNX4	brown	-0.034262	0.691022	0.0148909	0.862882	-0.189464	0.0265941	-0.0859397	0.318022	-0.0288966	0.737477	0.117921	0.169946	-0.0414607	0.630484	0.0698433	0.417368	-0.201597	0.018161	-0.0771505	0.370207	-0.356168	1.94088e-05	-0.548174	4.10541e-12	-0.0560386	0.515424	0.222229	0.00905393	0.282903	0.000809121	-0.0743227	0.388056	-0.110646	0.198035	0.0350541	0.684255	-0.0155074	0.857264	0.260063	0.00214737	-0.0728326	0.397666	0.470292	6.68752e-09
ASPSCR1	brown	-0.0315495	0.714376	-0.0942642	0.273225	0.165926	0.0526505	0.0586879	0.495734	0.0535611	0.534192	-0.0996669	0.24655	-0.0269083	0.754946	-0.0561913	0.514278	0.194658	0.0226441	0.423548	2.51034e-07	0.299644	0.000374825	0.845928	1.11754e-38	0.295738	0.000450421	-0.0168026	0.845486	-0.226573	0.007759	-0.148641	0.0830073	-0.141103	0.100037	-0.291904	0.000538087	-0.366023	1.08972e-05	-0.59757	1.27111e-14	-0.300513	0.000359683	-0.367668	9.87775e-06
NPIPP1	brown	-0.064702	0.452552	-0.0644301	0.454459	0.106805	0.214156	-0.0152168	0.859912	-0.086332	0.31581	-0.0989116	0.250166	0.0347906	0.686504	-0.0756902	0.37936	-0.0447803	0.603343	0.248978	0.00334779	0.301912	0.000336495	0.688125	1.54302e-20	0.472386	5.61142e-09	-0.00512337	0.952619	-0.141322	0.0995051	-0.0622445	0.469939	-0.0200236	0.816347	-0.319043	0.000144764	-0.260329	0.0021241	-0.385541	3.28011e-06	-0.214152	0.0119765	-0.364029	1.22664e-05
DHPS	brown	-0.0673541	0.4342	-0.0745587	0.386546	0.23522	0.00565945	0.0826097	0.337205	0.033705	0.695795	-0.154513	0.0714199	-0.0578623	0.501827	-0.112911	0.188954	0.131614	0.125259	0.390973	2.31584e-06	0.398511	1.41388e-06	0.70227	1.15802e-21	0.421198	2.97042e-07	-0.00220319	0.979615	-0.14671	0.0871304	-0.143311	0.094786	-0.0908526	0.29104	-0.345581	3.53365e-05	-0.413176	5.22533e-07	-0.565604	5.9606e-13	-0.389758	2.50468e-06	-0.248562	0.00340272
EVA1B	brown	-0.0145653	0.865853	-0.185745	0.0297714	-0.0652559	0.448684	0.0027444	0.974609	0.0105482	0.902633	-0.0738392	0.391159	-0.103555	0.228509	-0.101558	0.237653	0.086042	0.317444	0.192132	0.0244971	0.0869517	0.312336	0.753068	2.58308e-26	0.245698	0.00380409	-0.153642	0.0730511	-0.272741	0.00126209	-0.119878	0.162922	0.0416318	0.629073	-0.167201	0.0508349	-0.0919192	0.285389	-0.262639	0.00193151	0.148712	0.0828582	-0.491313	1.08756e-09
TGOLN2	brown	0.0806848	0.348621	-0.00962239	0.911142	-0.11022	0.199777	0.0605015	0.482488	-0.0192823	0.823032	0.0722099	0.401724	-0.0692294	0.421484	0.0189654	0.825894	-0.290199	0.000581917	-0.13782	0.108266	-0.345519	3.546e-05	-0.642504	2.60706e-17	-0.0659302	0.444	0.025844	0.764349	0.199353	0.0195184	-0.18195	0.0333409	-0.0552025	0.52172	0.188108	0.0277177	-0.000709474	0.993435	0.382933	3.86827e-06	0.0677888	0.431233	0.522264	5.93288e-11
HNRNPH2	brown	-0.0239423	0.781235	0.0810338	0.346533	-0.107892	0.209499	-0.158798	0.06382	-0.051095	0.553209	0.0712057	0.408319	-0.0259864	0.763089	0.0833847	0.332675	-0.265764	0.00169623	-0.420764	3.06368e-07	-0.146754	0.0870345	-0.744694	1.79537e-25	-0.287102	0.000670044	0.0740019	0.390113	0.352055	2.45594e-05	0.0845632	0.325864	0.176009	0.0396528	0.22692	0.00766283	0.224593	0.00832733	0.52502	4.51363e-11	0.112288	0.191419	0.272547	0.00127266
CCDC159	brown	-0.00778804	0.928031	-0.141337	0.0994693	0.204086	0.0167517	0.0426235	0.620919	-0.0611094	0.478091	-0.059409	0.490444	-0.00529755	0.95101	-0.145315	0.0902099	-0.140867	0.100612	0.278726	0.000973312	0.378776	5.01682e-06	0.803913	2.91008e-32	0.468525	7.74809e-09	0.0239923	0.78079	-0.0954071	0.267425	-0.155034	0.0704584	0.0499382	0.56224	-0.238699	0.00496928	-0.244585	0.00397115	-0.490792	1.13937e-09	-0.356588	1.89452e-05	-0.337522	5.49738e-05
ERGIC2	brown	-0.150982	0.0782184	0.281377	0.000865911	-0.027315	0.751363	-0.0240336	0.780422	0.156307	0.0681541	0.0348582	0.685926	0.048268	0.575402	0.091203	0.289175	0.392418	2.10884e-06	-0.122478	0.153923	0.0750487	0.383424	-0.427647	1.86611e-07	-0.424098	2.41291e-07	0.0256805	0.765796	-0.000374387	0.996536	0.126164	0.141819	-0.169278	0.0479865	-0.0249096	0.772633	0.117	0.17333	0.214273	0.011927	0.315626	0.000171987	-0.0728872	0.397311
MST1	brown	-0.00872452	0.919404	-0.0539339	0.531347	0.104147	0.225844	0.0475898	0.580789	0.00786747	0.927299	-0.0167834	0.845661	0.0999487	0.24521	0.0175018	0.839142	0.00272701	0.97477	0.414483	4.77059e-07	0.0657508	0.445244	0.698121	2.514e-21	0.598941	1.0674e-14	0.165585	0.0531458	-0.183656	0.0316942	-0.10207	0.235287	-0.22764	0.00746704	-0.312798	0.00019805	-0.305405	0.000284497	-0.512521	1.52986e-10	-0.316531	0.000164351	-0.167725	0.0501031
CDC42EP5	brown	0.0481139	0.576625	-0.0895474	0.298055	0.0994735	0.247473	0.107433	0.211458	0.0228006	0.791423	0.0142448	0.868778	-0.00926775	0.914405	-0.144513	0.0920194	0.105524	0.219733	0.532346	2.15564e-11	0.251457	0.00303633	0.596594	1.43871e-14	0.348679	2.97195e-05	-0.079823	0.35381	-0.297054	0.00042351	-0.0727246	0.398368	-0.271106	0.00135361	-0.282798	0.000812926	-0.374763	6.42649e-06	-0.610099	2.49666e-15	-0.340283	4.73154e-05	0.094783	0.270582
SARS2	brown	-0.12739	0.137955	0.05496	0.523553	0.208094	0.014682	0.134135	0.118123	0.137501	0.109093	-0.0644711	0.454171	-0.0155741	0.856657	-0.0139415	0.871547	0.31638	0.000165607	0.417153	3.95647e-07	0.321179	0.000129843	0.744394	1.92169e-25	0.351252	2.5704e-05	-0.0194385	0.821623	-0.258344	0.00230335	0.0522762	0.544059	-0.178912	0.0364533	-0.339941	4.82046e-05	-0.350785	2.63924e-05	-0.583278	7.48011e-14	-0.25017	0.00319453	-0.304324	0.00029974
DMAP1	brown	0.00425982	0.960598	-0.230354	0.00676822	0.0414761	0.630357	0.0488464	0.570828	0.00843784	0.922044	-0.0987681	0.250858	-0.0772055	0.369865	-0.0367155	0.670145	-0.124726	0.146452	0.0586059	0.496337	0.360852	1.47875e-05	0.739717	5.48536e-25	0.550058	3.35024e-12	0.123849	0.149333	0.0327492	0.704013	-0.102607	0.232817	0.239523	0.00481724	-0.109923	0.201002	-0.161026	0.0601379	-0.322322	0.000122463	-0.322394	0.000122011	-0.582654	8.06531e-14
MUS81	brown	0.0134043	0.876456	-0.082408	0.338389	0.097488	0.257082	0.194443	0.0227972	0.0219395	0.79913	-0.0850954	0.322818	0.0420105	0.625954	-0.106695	0.214631	0.239328	0.00485271	0.559429	1.19611e-12	0.163839	0.0557401	0.750918	4.28024e-26	0.558845	1.27667e-12	-0.221458	0.00930285	-0.452516	2.8316e-08	0.00486423	0.955013	-0.25298	0.00285814	-0.42646	2.0342e-07	-0.474722	4.6072e-09	-0.660773	1.55219e-18	-0.285545	0.000718828	-0.0518673	0.547218
RFNG	brown	-0.0529759	0.538675	-0.122949	0.152336	0.0840338	0.328913	0.0547637	0.525039	0.0762768	0.375667	-0.0154976	0.857353	0.0268673	0.755307	-0.00195524	0.981909	0.11713	0.172848	0.316401	0.000165426	0.185082	0.0303703	0.809647	4.8297e-33	0.409088	6.92949e-07	-0.0120181	0.889147	-0.249538	0.00327497	-0.165977	0.0525771	-0.0962217	0.263343	-0.264854	0.00176194	-0.218089	0.0104619	-0.41622	4.22453e-07	-0.0648539	0.45149	-0.456357	2.08733e-08
PAGR1	brown	-0.0398833	0.643559	-0.175237	0.0405426	0.0607056	0.481009	-0.0197738	0.818599	0.0778929	0.365606	-0.0264244	0.759217	-0.0861498	0.316836	0.0518012	0.547729	0.0289847	0.736706	0.366027	1.08948e-05	-0.0327752	0.703789	0.683403	3.54535e-20	0.25098	0.00309416	0.0508345	0.555236	-0.207808	0.0148215	-0.0126543	0.883319	-0.171742	0.0447806	-0.270055	0.00141553	-0.271407	0.00133633	-0.44186	6.47047e-08	-0.176101	0.0395478	-0.171659	0.0448862
D2HGDH	brown	-0.0531685	0.537198	-0.0928612	0.28046	0.164882	0.0541784	0.147999	0.0843595	0.145178	0.0905174	-0.0308255	0.720656	-0.0170558	0.843187	-0.0256988	0.765634	0.0578664	0.501797	0.518539	8.55229e-11	0.203344	0.0171618	0.785997	5.54533e-30	0.671848	2.54555e-19	-0.00796862	0.926367	-0.261943	0.00198782	-0.124887	0.145928	-0.225882	0.00795317	-0.376382	5.81784e-06	-0.444237	5.39411e-08	-0.649682	8.80527e-18	-0.430801	1.4814e-07	-0.0518905	0.547038
C11orf58	brown	-0.0658681	0.44443	0.004575	0.957685	-0.113813	0.185422	0.00507582	0.953058	0.00589085	0.945531	0.0366412	0.670773	-0.00787222	0.927255	0.00883432	0.918393	-0.182413	0.0328869	-0.408595	7.16742e-07	-0.177124	0.0383977	-0.676369	1.18961e-19	-0.245852	0.00378145	0.0375511	0.66309	0.216984	0.0108689	0.186775	0.0288611	0.164122	0.0553124	0.227708	0.00744885	0.23824	0.00505569	0.517458	9.5022e-11	0.261667	0.00201055	0.195487	0.0220631
CCDC107	brown	-0.070953	0.409989	-0.0269184	0.754857	0.0410293	0.634049	0.0472222	0.583718	0.0688938	0.423743	0.0341364	0.692097	-0.0336129	0.696585	-0.0411513	0.63304	0.165477	0.0533035	0.380628	4.47014e-06	0.197268	0.0208574	0.63598	6.82283e-17	0.277489	0.00102751	-0.0144089	0.867279	-0.272333	0.00128441	-0.244288	0.00401685	-0.16827	0.049351	-0.331754	7.48684e-05	-0.382398	4.00069e-06	-0.469329	7.24667e-09	-0.206402	0.0155269	-0.206072	0.0156962
FEM1B	brown	-0.0207284	0.810003	0.0158807	0.853867	-0.20651	0.0154717	-0.0871136	0.311432	-0.0262905	0.7604	0.0458516	0.594697	-0.0633663	0.461958	0.119001	0.16604	-0.220954	0.00946853	-0.563103	7.91693e-13	-0.388884	2.64946e-06	-0.814735	9.31691e-34	-0.422204	2.76434e-07	-0.0128306	0.881705	0.272677	0.0012656	0.131492	0.125614	0.243705	0.00410789	0.370081	8.54373e-06	0.425372	2.20102e-07	0.761185	3.65736e-27	0.522197	5.97201e-11	0.167133	0.0509303
RB1	brown	0.0157224	0.855307	0.0306541	0.722145	-0.0147847	0.863851	-0.061981	0.471824	0.00106924	0.990106	0.0145516	0.865977	-0.0108636	0.899737	0.121218	0.158237	-0.0111907	0.896734	-0.243111	0.00420248	-0.275964	0.0010981	-0.641045	3.23953e-17	-0.136296	0.112262	-0.0849714	0.323525	0.18552	0.0299733	0.105564	0.219556	0.0174023	0.840043	0.22053	0.00961031	0.158729	0.0639368	0.375385	6.18609e-06	0.108989	0.204878	0.337902	5.38536e-05
PNPLA2	brown	0.000564929	0.994773	-0.113867	0.185211	0.00519275	0.951978	0.147742	0.0849075	0.0169873	0.843809	0.0339727	0.693499	0.0335176	0.697403	-0.124848	0.146055	-0.026464	0.758867	0.484976	1.90506e-09	0.167717	0.0501133	0.710171	2.54839e-22	0.574336	2.17112e-13	-0.0174252	0.839836	-0.213528	0.0122334	-0.105799	0.218527	-0.163214	0.0566941	-0.361743	1.40344e-05	-0.412544	5.45977e-07	-0.600624	8.60427e-15	-0.482879	2.28744e-09	-0.0273067	0.751435
ACSF3	brown	0.00446047	0.958744	-0.0665466	0.439742	0.237077	0.00528111	0.166598	0.0516864	-0.0196271	0.819922	-0.0784721	0.362041	-0.0969596	0.259682	-0.0704789	0.413132	0.198143	0.0202859	0.48192	2.48623e-09	0.380387	4.53788e-06	0.685613	2.40671e-20	0.337421	5.52752e-05	-0.130717	0.127876	-0.420855	3.04394e-07	-0.164886	0.0541714	-0.167378	0.0505864	-0.279491	0.000941136	-0.396992	1.56324e-06	-0.657351	2.67229e-18	-0.368315	9.50213e-06	-0.0504967	0.55787
MRPL53	brown	0.0721486	0.402125	-0.123385	0.150875	0.0825228	0.337714	0.0673812	0.434014	-0.00111177	0.989713	-0.157545	0.0659705	-0.069293	0.421056	-0.116179	0.176386	0.0919921	0.285005	0.358803	1.66647e-05	0.298119	0.00040283	0.775178	1.04093e-28	0.375096	6.29666e-06	0.000487477	0.995489	-0.219775	0.00986696	-0.143612	0.0940873	-0.0700025	0.416305	-0.296223	0.000440318	-0.398918	1.37625e-06	-0.51619	1.07465e-10	-0.270424	0.00139349	-0.364619	1.1845e-05
WDR74	brown	-0.0485054	0.573523	0.0177699	0.836712	0.245312	0.00386135	0.112	0.192569	0.0671549	0.435564	-0.135225	0.115138	-0.0224982	0.794127	-0.0752401	0.382209	0.402458	1.08664e-06	0.419399	3.37577e-07	0.57978	1.13922e-13	0.753987	2.07826e-26	0.234243	0.00586814	-0.0612984	0.476728	-0.304304	0.000300022	-0.0618266	0.472931	-0.123721	0.149758	-0.33626	5.88477e-05	-0.452956	2.73494e-08	-0.672482	2.28993e-19	-0.402343	1.09504e-06	-0.389071	2.61787e-06
OSGEP	brown	-0.0559862	0.515817	-0.170648	0.0461811	0.177652	0.0378144	0.0516589	0.548831	-0.0395052	0.646709	-0.00383027	0.964568	0.00564932	0.947761	-0.0764669	0.374475	0.0293686	0.733349	0.262412	0.00194975	0.427881	1.83459e-07	0.608459	3.10202e-15	0.532471	2.12836e-11	-0.138181	0.107336	-0.214659	0.0117711	-0.0227451	0.791919	0.0419763	0.626235	-0.219337	0.0100186	-0.253507	0.00279873	-0.511672	1.65916e-10	-0.392651	2.07716e-06	-0.107993	0.209071
UBE2M	brown	0.0457011	0.595908	-0.0444395	0.606106	0.108079	0.208707	0.134727	0.116496	0.0428931	0.61871	-0.177393	0.0380997	-0.114413	0.183097	-0.141854	0.0982251	0.340746	4.61325e-05	0.32462	0.000108787	0.396375	1.62808e-06	0.697056	3.06078e-21	0.255741	0.00255903	-0.164177	0.0552294	-0.176405	0.0392027	-0.0413442	0.631446	-0.0756411	0.37967	-0.238948	0.00492276	-0.304214	0.000301331	-0.500265	4.83071e-10	-0.212704	0.0125799	-0.433386	1.22384e-07
EME2	brown	0.00259889	0.975955	-0.0332886	0.69937	0.114815	0.181554	0.0700536	0.415964	0.0342315	0.691283	-0.0347484	0.686864	0.0756846	0.379396	0.0231784	0.788047	0.0600048	0.486096	0.452664	2.79861e-08	0.108801	0.205666	0.711501	1.96543e-22	0.703802	8.66856e-22	-0.058371	0.498068	-0.275246	0.00113284	0.0357167	0.678614	-0.171657	0.0448885	-0.321016	0.000130929	-0.355267	2.04416e-05	-0.581258	9.54305e-14	-0.369915	8.63019e-06	-0.0383356	0.656494
KLHDC4	brown	0.0107754	0.900547	-0.124889	0.145919	0.223524	0.00864936	0.133746	0.119205	0.0653243	0.448208	-0.135556	0.114244	-0.0525204	0.542178	-0.103667	0.228003	0.192047	0.024562	0.453428	2.63471e-08	0.470729	6.44794e-09	0.798716	1.40898e-31	0.510473	1.85981e-10	-0.0382189	0.657473	-0.286023	0.000703499	-0.130491	0.128544	-0.10501	0.221999	-0.292958	0.000512542	-0.431575	1.39929e-07	-0.703879	8.54204e-22	-0.514387	1.27897e-10	-0.199984	0.0191278
ELOB	brown	0.0583962	0.497882	0.0922077	0.283873	0.194683	0.022626	0.137196	0.109888	-0.0142125	0.869072	-0.0999041	0.245421	-0.0959944	0.264478	-0.113312	0.187377	0.227356	0.00754381	0.546046	5.15695e-12	0.227466	0.00751395	0.609189	2.81661e-15	0.125094	0.145256	-0.0795811	0.355275	-0.279699	0.00093258	0.00429346	0.960287	-0.365944	1.09485e-05	-0.432255	1.33074e-07	-0.334375	6.51142e-05	-0.614607	1.36557e-15	-0.246776	0.00364824	-0.0267668	0.756194
RPS6KA4	brown	0.0181325	0.833427	0.000409953	0.996207	0.133472	0.119968	0.169798	0.047295	0.146362	0.0878909	-0.0678207	0.431015	-0.0620186	0.471555	-0.093896	0.275111	0.460028	1.55425e-08	0.616987	9.89189e-16	0.0638355	0.458642	0.598693	1.1018e-14	0.262536	0.00193973	-0.205259	0.0161211	-0.399619	1.31357e-06	-0.0259105	0.76376	-0.389138	2.60664e-06	-0.406671	8.17346e-07	-0.43648	9.71735e-08	-0.65429	4.31904e-18	-0.243576	0.00412822	0.0734118	0.393914
ZNF593	brown	-0.0345775	0.688323	0.0264118	0.759328	0.104916	0.222416	0.0909862	0.290327	0.0868966	0.312643	-0.0198995	0.817465	0.0042856	0.96036	-0.082174	0.339768	0.336736	5.73557e-05	0.454027	2.51257e-08	0.407863	7.53562e-07	0.804778	2.22767e-32	0.126002	0.142333	0.020613	0.81104	-0.253312	0.00282054	-0.0260114	0.762867	-0.203368	0.0171484	-0.367063	1.02415e-05	-0.354649	2.11793e-05	-0.675918	1.2843e-19	-0.352078	2.45271e-05	-0.388904	2.64607e-06
NDUFB8	brown	0.0182872	0.832027	-0.0696015	0.418987	0.17688	0.0386691	-0.0215238	0.802857	-0.0899008	0.296144	-0.127748	0.136843	-0.0364721	0.672204	-0.172831	0.0434221	-0.00016467	0.998476	0.102052	0.235368	0.468216	7.9493e-09	0.590236	3.19067e-14	0.116843	0.173911	0.0859807	0.31779	0.0292224	0.734627	0.0163817	0.84931	0.133723	0.119268	-0.240369	0.00466541	-0.0701241	0.415494	-0.363428	1.27091e-05	-0.285331	0.000725776	-0.432101	1.34593e-07
C11orf98	brown	-0.0182769	0.83212	0.00513981	0.952467	0.153855	0.0726486	-0.00432913	0.959957	0.00469714	0.956557	-0.128981	0.133064	-0.0410771	0.633654	-0.0914816	0.287698	0.298603	0.000393742	0.483307	2.20391e-09	0.163647	0.0560317	0.69761	2.76332e-21	0.128023	0.135991	-0.082338	0.338801	-0.337251	5.57841e-05	0.0826847	0.336764	-0.257597	0.00237426	-0.387308	2.9309e-06	-0.323377	0.000115996	-0.611022	2.20817e-15	-0.246634	0.00366852	-0.147543	0.085331
AC026471.4	brown	-0.0032761	0.969692	-0.0466389	0.588379	0.0454793	0.597695	0.108529	0.206806	0.0408369	0.635642	-0.183648	0.0317012	-0.096368	0.262614	-0.0460432	0.593156	0.0309321	0.71973	0.336783	5.72121e-05	0.29907	0.000385141	0.628854	1.9012e-16	0.603397	6.01576e-15	-0.123967	0.148942	-0.172196	0.0442103	-0.0827523	0.336368	-0.0363634	0.673126	-0.291756	0.000541773	-0.404406	9.53061e-07	-0.451673	3.02601e-08	-0.351266	2.56828e-05	-0.190605	0.0256791
INTS11	brown	0.067272	0.434762	-0.0868452	0.312931	0.115506	0.178924	0.0309967	0.71917	0.0111614	0.897004	0.0323713	0.707271	0.00494086	0.954305	-0.0204994	0.812062	0.156523	0.0677684	0.348513	2.99982e-05	0.16243	0.057908	0.784748	7.8453e-30	0.422982	2.6144e-07	-0.0458698	0.594551	-0.257766	0.00235799	-0.0138081	0.872766	-0.0984771	0.252263	-0.330898	7.83387e-05	-0.262798	0.00191886	-0.497833	6.03647e-10	-0.195792	0.0218519	-0.344772	3.69602e-05
GHITM	brown	0.0749533	0.384031	0.116769	0.174187	-0.0203062	0.813802	-0.0915538	0.287316	-0.0643207	0.455227	-0.0186624	0.828633	-0.029737	0.730132	-0.00107765	0.990028	-0.0411004	0.633461	-0.211207	0.0132314	-0.13786	0.108162	-0.515444	1.15496e-10	-0.328506	8.88534e-05	0.000836728	0.992258	0.193906	0.0231828	0.219084	0.0101072	0.0575838	0.503891	0.129337	0.131987	0.177608	0.0378623	0.231689	0.00644626	-0.0462802	0.591253	0.327445	9.39262e-05
ATP6V0C	brown	-0.00302908	0.971976	-0.119336	0.164844	0.0258601	0.764206	0.0134374	0.876153	0.0431873	0.616303	-0.00894109	0.917411	-0.0755305	0.38037	0.00793963	0.926634	0.0694844	0.419772	0.404209	9.65834e-07	-0.163352	0.056482	0.582495	8.22154e-14	0.366266	1.07404e-05	-0.0693989	0.420345	-0.289629	0.000597291	-0.0593615	0.490792	-0.231715	0.00644011	-0.26348	0.00186545	-0.234355	0.00584386	-0.410984	6.08213e-07	-0.127798	0.136688	0.0121782	0.887679
CINP	brown	-0.138231	0.107208	0.0831304	0.334157	0.312751	0.000198513	0.0338839	0.69426	0.146008	0.088669	-0.0220002	0.798586	-0.0184925	0.830169	-0.0113322	0.895436	0.342199	4.25996e-05	0.302603	0.000325559	0.476681	3.90084e-09	0.461473	1.38252e-08	-0.135244	0.115087	0.146426	0.0877498	-0.0562444	0.51388	-0.0471383	0.584387	-0.231395	0.00651607	-0.277372	0.00103278	-0.190162	0.0260314	-0.459666	1.60029e-08	-0.196415	0.021427	-0.350946	2.61534e-05
ANKRD50	brown	-0.00111872	0.989648	0.115035	0.180714	-0.219698	0.00989341	0.0206513	0.810696	0.109741	0.201752	0.064473	0.454158	-0.0357012	0.678745	0.0425962	0.621142	0.136189	0.112548	-0.05203	0.54596	-0.453305	2.66039e-08	-0.657796	2.4913e-18	-0.296678	0.000431041	-0.0792029	0.357573	-0.0772886	0.369349	0.0460261	0.593294	-0.262625	0.00193261	0.0303034	0.725196	0.0583764	0.498028	0.360765	1.48626e-05	0.368594	9.34392e-06	0.439975	7.46733e-08
MGAT2	brown	-0.0507726	0.555718	-0.114098	0.184315	0.0146992	0.864631	0.0497548	0.563678	0.138872	0.105573	0.0861687	0.31673	-0.0256185	0.766346	0.0284084	0.741754	0.138049	0.107676	0.343534	3.95795e-05	-0.151027	0.0781289	0.302019	0.000334785	0.209134	0.0141827	-0.103977	0.226605	-0.292565	0.000521945	-0.0918083	0.285973	-0.259277	0.00221741	-0.224499	0.00835517	-0.245744	0.00379733	-0.316253	0.000166661	-0.102698	0.232403	0.214496	0.0118368
RNF145	brown	-0.0535404	0.534351	0.0420132	0.625932	-0.212488	0.012672	-0.0134581	0.875965	0.00968756	0.910543	0.050329	0.559181	-0.0143419	0.867891	-0.0037228	0.965562	-0.0181922	0.832887	-0.207609	0.01492	-0.361955	1.3861e-05	-0.554528	2.05808e-12	-0.057959	0.501111	-0.30515	0.000288025	0.00046426	0.995704	0.0525377	0.542044	0.0329796	0.702028	0.11326	0.187581	0.0973158	0.257928	0.386003	3.18514e-06	0.270132	0.00141092	0.338938	5.09107e-05
PPIP5K2	brown	-0.0273353	0.751184	0.0913478	0.288407	-0.0227363	0.791998	-0.0416808	0.628669	-0.00798127	0.92625	0.109563	0.20249	0.0834015	0.332578	0.0459671	0.593769	-0.0595431	0.489464	-0.176945	0.0385963	-0.188161	0.0276725	-0.674775	1.55811e-19	-0.0788282	0.35986	-0.0847362	0.324872	0.00221539	0.979502	0.0829693	0.335098	-0.0647659	0.452105	0.0802562	0.351195	0.0879239	0.306936	0.341673	4.38488e-05	0.148449	0.0834089	0.52228	5.92358e-11
HAGH	brown	0.00954686	0.911837	0.0902525	0.294251	0.125617	0.143568	0.0367245	0.670068	-0.0497148	0.563992	-0.0433051	0.615341	-0.000618312	0.994279	-0.110088	0.200322	-0.041792	0.627752	0.233213	0.00609543	0.200306	0.0189318	0.493872	8.6449e-10	-0.0596334	0.488804	0.208731	0.0143743	0.0858297	0.318644	-0.0524843	0.542455	-0.0890416	0.300803	-0.231894	0.00639808	-0.0610069	0.47883	-0.378593	5.0742e-06	-0.26302	0.00190133	-0.239355	0.00484781
MALSU1	brown	0.0188135	0.827267	0.0303299	0.724966	0.119316	0.164915	0.0982097	0.25356	0.182169	0.0331253	-0.0303675	0.724638	-0.0534388	0.535128	-0.0347219	0.68709	0.389039	2.62328e-06	0.403136	1.03826e-06	0.424911	2.27556e-07	0.649622	8.88658e-18	0.0205107	0.811961	-0.0145574	0.865925	-0.223303	0.0087172	-0.0380634	0.65878	-0.225159	0.00816127	-0.390951	2.31914e-06	-0.324438	0.000109812	-0.5821	8.62333e-14	-0.299743	0.00037307	-0.375826	6.02042e-06
PPP1R14BP3	brown	-0.0706993	0.411669	0.104109	0.226011	0.136238	0.112416	0.0538305	0.532135	0.0866876	0.313813	-0.0923515	0.283119	-0.0623904	0.468897	-0.0445982	0.604819	0.547637	4.34913e-12	0.478745	3.26944e-09	0.309712	0.000230638	0.634756	8.1509e-17	0.155274	0.0700181	0.058909	0.494108	-0.316127	0.000167725	-0.0993293	0.248162	-0.345109	3.62764e-05	-0.42129	2.95098e-07	-0.367874	9.75664e-06	-0.571757	2.93472e-13	-0.123131	0.151726	-0.366134	1.08252e-05
DNAJC4	brown	-0.0713902	0.407103	-0.110995	0.196617	0.201608	0.0181547	0.0294575	0.732572	-0.00760779	0.929692	-0.0111474	0.897132	-0.0373006	0.665202	-0.0529833	0.538618	-0.0818832	0.341485	0.20518	0.016163	0.436422	9.75911e-08	0.782624	1.40864e-29	0.387944	2.81414e-06	0.203132	0.0172805	-0.103979	0.226597	-0.259915	0.00216043	0.095598	0.266465	-0.165578	0.0531565	-0.265982	0.00168081	-0.4522	2.90284e-08	-0.319772	0.0001395	-0.455408	2.25145e-08
PGM2	brown	0.0862442	0.316304	0.0508854	0.554839	-0.104382	0.224794	-0.0743121	0.388124	0.0580893	0.500148	0.0623646	0.469081	0.0364077	0.67275	0.0823104	0.338964	0.228592	0.00721489	-0.0600573	0.485714	-0.254951	0.00264158	-0.580285	1.07245e-13	-0.347298	3.21114e-05	-0.261074	0.00206015	-0.109176	0.204097	0.0778698	0.365748	-0.164648	0.0545258	0.0727931	0.397923	0.0992683	0.248454	0.243237	0.00418237	0.250137	0.00319874	0.399538	1.32067e-06
SYTL1	brown	-0.0586824	0.495774	-0.0331312	0.700724	0.0797363	0.354335	0.142868	0.0958212	0.0405764	0.6378	-0.0378301	0.660741	-0.0127306	0.88262	-0.0315323	0.714525	0.2402	0.00469539	0.45419	2.4803e-08	0.206781	0.0153341	0.734207	1.83424e-24	0.48282	2.29933e-09	-0.0524333	0.542848	-0.350215	2.72568e-05	-0.0523371	0.54359	-0.127397	0.137934	-0.329937	8.24162e-05	-0.456908	1.99739e-08	-0.630746	1.45194e-16	-0.352075	2.45312e-05	-0.196242	0.0215446
CAPN15	brown	0.0178324	0.836145	-0.119499	0.164263	0.118436	0.168077	0.107281	0.21211	0.0309562	0.719521	-0.0152865	0.859277	-0.0134141	0.876367	-0.00683896	0.936782	0.0757766	0.378815	0.570173	3.527e-13	0.0641831	0.456194	0.733716	2.03985e-24	0.551363	2.90822e-12	-0.0393682	0.647852	-0.348425	3.01469e-05	-0.116404	0.175547	-0.277111	0.00104463	-0.367286	1.01062e-05	-0.450466	3.32683e-08	-0.65297	5.30368e-18	-0.396988	1.56361e-06	0.104071	0.226185
STUB1	brown	-0.0177426	0.836959	-0.115353	0.179502	0.154663	0.0711423	0.0806644	0.348743	0.130613	0.128185	-0.079246	0.357311	-0.110826	0.197303	-0.0444357	0.606137	0.0773391	0.369035	0.360677	1.49397e-05	0.160679	0.0607001	0.791876	1.04839e-30	0.23274	0.00620256	0.0529857	0.5386	-0.133781	0.119106	-0.124099	0.148507	-0.101534	0.237766	-0.257642	0.00236993	-0.292318	0.000527914	-0.495208	7.66209e-10	-0.230638	0.00669861	-0.32429	0.000110658
TSNARE1	brown	0.0115835	0.893131	0.0617757	0.473296	0.217726	0.0105941	0.0807546	0.348203	0.0840736	0.328683	-0.0792965	0.357004	-0.0743593	0.387821	-0.0160133	0.85266	0.191817	0.0247375	0.522652	5.7094e-11	0.228119	0.00733938	0.595777	1.59539e-14	0.383468	3.74017e-06	0.0375649	0.662974	-0.280944	0.000882681	-0.0927111	0.281241	-0.306185	0.000273949	-0.388133	2.78029e-06	-0.425522	2.17734e-07	-0.614301	1.42301e-15	-0.364769	1.174e-05	-0.00195326	0.981927
ASNSD1	brown	0.0374673	0.663796	-0.0571536	0.507088	0.0509838	0.554073	-0.111781	0.193444	-0.0802435	0.351272	0.101517	0.237844	0.0043379	0.959876	0.128055	0.135893	-0.34709	3.24872e-05	-0.567901	4.58299e-13	0.055891	0.516532	-0.580964	9.88567e-14	-0.413409	5.14155e-07	0.121286	0.158	0.375963	5.96996e-06	-0.055779	0.517374	0.383095	3.82912e-06	0.395493	1.72523e-06	0.343871	3.88508e-05	0.600025	9.29251e-15	0.218373	0.0103595	-0.042096	0.62525
MVB12A	brown	-0.0721859	0.401881	-0.00756719	0.930066	0.181465	0.0338219	0.0413911	0.631059	0.0293574	0.733447	-0.068533	0.426181	-0.0487928	0.571251	-0.0449925	0.601627	0.280749	0.000890323	0.594006	1.99395e-14	0.292207	0.000530645	0.815739	6.69523e-34	0.265503	0.00171485	-0.0237854	0.782633	-0.368906	9.17049e-06	-0.122894	0.152521	-0.348798	2.95223e-05	-0.447886	4.06891e-08	-0.401786	1.13674e-06	-0.672168	2.41333e-19	-0.242188	0.0043535	-0.190826	0.0255051
NDUFA13	brown	-0.0334425	0.698049	-0.0322532	0.708291	0.185816	0.0297082	-0.000934824	0.99135	-0.0288113	0.738224	-0.116156	0.176473	0.0115165	0.893745	-0.0925092	0.282295	0.188249	0.0275987	0.335834	6.02115e-05	0.434152	1.15612e-07	0.791056	1.32676e-30	0.141932	0.0980386	0.00524176	0.951525	-0.128957	0.133135	-0.0122562	0.886965	-0.0575766	0.503944	-0.282839	0.000811442	-0.193643	0.0233735	-0.585479	5.7251e-14	-0.319069	0.000144571	-0.42223	2.75922e-07
NCOA4	brown	0.0710638	0.409256	0.0131355	0.878915	-0.166165	0.0523063	-0.0722614	0.401388	-0.0596671	0.488558	0.1096	0.202336	0.0161758	0.851182	0.116616	0.174756	-0.363283	1.28186e-05	-0.482121	2.44319e-09	-0.23219	0.00632896	-0.79512	4.08592e-31	-0.269182	0.00146897	0.085048	0.323088	0.345157	3.61785e-05	0.0253569	0.768664	0.239146	0.00488617	0.349449	2.84606e-05	0.340315	4.72306e-05	0.602536	6.72548e-15	0.166201	0.0522542	0.366873	1.03585e-05
EIF2B5	brown	-0.0856139	0.319867	0.0139022	0.871906	0.109042	0.204656	0.101208	0.239283	0.10629	0.216385	-0.147395	0.0856494	-0.0153085	0.859076	0.00103355	0.990436	0.299902	0.000370266	0.238837	0.00494342	0.401699	1.1434e-06	0.534831	1.67098e-11	0.418261	3.65897e-07	-0.165165	0.0537599	-0.224794	0.00826808	-0.0712855	0.407793	0.0256475	0.766089	-0.18167	0.0336178	-0.329837	8.28509e-05	-0.460955	1.44194e-08	-0.301879	0.00033703	-0.297393	0.000416817
SLC30A1	brown	-0.00576618	0.946682	0.210471	0.0135624	-0.0882263	0.305268	0.0578747	0.501735	0.0950423	0.269267	0.0412193	0.632478	0.0177193	0.83717	-0.0203051	0.813811	0.026261	0.76066	-0.0248709	0.772976	-0.259762	0.00217392	-0.600946	8.25581e-15	-0.242476	0.00430589	-0.0163868	0.849264	0.0013318	0.987677	0.115352	0.179506	-0.264195	0.00181093	0.0225032	0.794082	0.0407385	0.636456	0.282513	0.000823289	0.262187	0.00196792	0.427718	1.85643e-07
USP8	brown	-0.0107012	0.901228	0.172212	0.0441908	-0.0773501	0.368967	-0.0429919	0.617901	-0.0568776	0.509145	0.0793263	0.356823	0.0291183	0.735536	0.0872633	0.310598	0.0383719	0.656189	-0.11741	0.171818	-0.34287	4.1057e-05	-0.767194	8.17926e-28	-0.409565	6.70644e-07	-0.0544471	0.527441	0.0655962	0.446317	0.149804	0.0805985	-0.153606	0.0731195	0.166828	0.0513601	0.130387	0.128851	0.309192	0.000236602	0.151655	0.076884	0.573866	2.29407e-13
FAM20B	brown	-0.0162017	0.850946	0.0562808	0.513607	-0.07246	0.400091	-0.0207984	0.809373	-0.054667	0.525772	0.0790521	0.358493	-0.0344723	0.689223	-0.157335	0.0663371	-0.116151	0.176492	-0.0802087	0.351482	-0.177486	0.037997	-0.595293	1.69576e-14	-0.177287	0.0382161	-0.067162	0.435515	0.165166	0.0537585	-0.297232	0.000419983	-0.159762	0.0622061	0.0556845	0.518085	-0.0583764	0.498028	0.378647	5.05725e-06	0.208707	0.0143855	0.355666	1.99779e-05
TM9SF2	brown	0.00765166	0.929288	0.12595	0.142498	-0.0712346	0.408129	-0.0152567	0.859549	-0.0354047	0.681268	0.0250969	0.770971	-0.044791	0.603257	0.0923279	0.283243	-0.0446487	0.604409	-0.0259574	0.763345	-0.323137	0.00011744	-0.623295	4.15288e-16	-0.281139	0.000875112	0.118486	0.167895	0.207378	0.0150343	-0.00330954	0.969383	-0.218811	0.0102035	0.0467471	0.587512	-0.0123175	0.886403	0.245946	0.0037677	0.0396085	0.645848	0.472278	5.66234e-09
DDTL	brown	0.0265455	0.758147	-0.0750033	0.383713	0.071008	0.409625	0.158849	0.0637344	-0.121413	0.157562	-0.0131485	0.878796	0.0507366	0.555999	0.0584938	0.497163	-0.0116949	0.89211	0.42619	2.07452e-07	0.228031	0.00736248	0.600759	8.45664e-15	0.548864	3.81137e-12	0.0821976	0.339628	-0.258007	0.00233506	-0.230526	0.00672589	-0.191707	0.0248213	-0.296527	0.000434096	-0.408899	7.02012e-07	-0.518215	8.82717e-11	-0.393685	1.94183e-06	-0.0271686	0.752652
COQ4	brown	-0.0317208	0.712893	-0.0919606	0.285171	0.116418	0.175494	0.0607533	0.480664	0.0299233	0.728508	-0.101011	0.240203	-0.0749226	0.384227	-0.0153433	0.85876	0.0265007	0.758543	0.458704	1.72941e-08	0.328466	8.90428e-05	0.805392	1.84163e-32	0.406207	8.43573e-07	0.227292	0.00756118	-0.144419	0.0922341	-0.162304	0.0581063	-0.166018	0.0525175	-0.361655	1.41077e-05	-0.405391	8.91609e-07	-0.607948	3.31804e-15	-0.447819	4.09028e-08	-0.274125	0.00118912
CUL3	brown	0.0738247	0.391252	0.150156	0.0798817	-0.00630775	0.941683	-0.0882949	0.304891	-0.0454506	0.597927	0.113179	0.187897	-0.000558571	0.994831	0.0356492	0.679188	0.0940516	0.274313	0.0730263	0.396409	-0.103259	0.229846	-0.528539	3.17176e-11	-0.240094	0.00471434	-0.0866811	0.31385	-0.0188597	0.826849	-0.0582684	0.498824	-0.218909	0.0101687	0.0424279	0.622524	-0.11099	0.196634	0.042664	0.620587	-0.104968	0.222186	0.554112	2.15423e-12
SPSB3	brown	0.0359619	0.676531	-0.0310486	0.718719	0.0654897	0.447057	0.0988538	0.250445	0.0640955	0.45681	-0.0485951	0.572813	-0.0693116	0.420932	-0.0438356	0.611014	0.164709	0.0544347	0.460867	1.4522e-08	0.0711191	0.408891	0.708769	3.34587e-22	0.34419	3.81715e-05	-0.0125382	0.884382	-0.398528	1.41229e-06	-0.0774464	0.368369	-0.231989	0.00637584	-0.344655	3.72017e-05	-0.35811	1.73479e-05	-0.534978	1.646e-11	-0.193628	0.0233847	-0.137017	0.110359
MBP	brown	-0.0164999	0.848236	0.105831	0.218386	-0.0989665	0.249902	-0.172655	0.0436393	-0.0790312	0.35862	0.0586931	0.495695	0.0618096	0.473053	0.117995	0.169675	-0.215023	0.0116255	-0.513045	1.45496e-10	-0.056438	0.512429	-0.632198	1.17924e-16	-0.424356	2.36843e-07	0.193537	0.023451	0.335404	6.16211e-05	0.0337629	0.695298	0.339926	4.82453e-05	0.393108	2.01628e-06	0.311053	0.000215907	0.477792	3.54767e-09	0.0766368	0.373412	0.0744197	0.387435
[truncated: 4,337 more rows]

## Sheet: Modules-traits relationships
Modules	Overall survival time	Overall survival status	Age	Gender	Grade	Stage	T	N
[truncated: 14 more rows]
